# Supplementary material for: Concurrent Disruption of the Ras/MAPK and NF-κB Pathways Induces Circadian Deregulation and Hepatocarcinogenesis
Source: Oxford University Press journal article supplement (doi:10.1158/1541-7786.mcr-21-0479), 2021-11-22
Supplement: mcr-21-0479_supp1.docx [file mcr-21-0479_supp1.docx]

**List of primers used for genotyping (5’-3’)**

| Cre forward | GCG CGG TCT GGC AGT AAA AAC TAT C |
| --- | --- |
| Cre reverse | TTG ATA GCT GGC TGG TGG GTG ATG |
| Shp2 forward | ACG TCA TGA TCC GCT GTC AG |
| Shp2 reverse | ATG GGA GGG ACA GTG CAG TG |
| Ikkβ forward | CCT TGT CCT ATA GAA GCA CAA C |
| Ikkβ reverse | GTC ATT TCC ACA GCC CTG TGA. |

**List of primers used for qPCR**

| **Primer name** | **Sequence (5’-3’)** |
| --- | --- |
| Col1a1 fwd | ATGGATTCCCGTTCGAGTACG |
| Col1a1 rev | TCAGCTGGATAGCGACATCG |
| Tgfb fwd | AGATTAAAATCAAGTGTGGAGCAAC |
| Tgfb rev | GTCCTTCCTAAAGTCAATGTACAGC |
| Ccl8 fwd | GTAGACCCCACACAGAAGTGG |
| Ccl8 rev | TTCCAGCTTTGGCTGTCTCTT |
| Ccl2 fwd | CCCAATGAGTAGGCTGGAGA |
| Ccl2 rev | TCTGGACCCATTCCTTCTTG |
| Ccr2 fwd | GGGCTGTGAGGCTCATCTTT |
| Ccr2 rev | TGCATGGCCTGGTCTAAGTG |
| Afp fwd | ATCGACCTCACCGGGAAGAT |
| Afp rev | GAGTTCACAGGGCTTGCTTCA |
| Igf2 fwd | GGGTCTTCCAACGGACTGG |
| Igf2 rev | CATTGGTACCACAAGGCCGAAG |
| Per2 fwd | CAGCTGCCCTCCCGGGATCT |
| Per2 rev | TCCTGGACATTGCATTGC |
| Per3 fwd | CCCTACGGTTGCTATCTTCAG |
| Per3 rev | CTTTCGTTTGTGCTTCTGCC |
| Cry1 fwd | CGCAGGTGTCGGTTATGAGC |
| Cry1 rev | ATAGACGCAGCGGATGGTGTCG |
| **Primer name** | **Sequence (5’-3’)** |
| Cry2 fwd | GGTTCCTACTGCAATCTCTGG |
| Cry2 rev | GTCATATTCAAAGGTCAAACGGG |
| Bmal1 fwd | GCCCCACCGACCTACTCT |
| Bmal1 rev | CTTTGTCTGTGTCCATACTTTCTTG |
| Clock1 fwd | CATCAACTCAGCAGAGTCAACA |
| Clock1 rev | AGGCTGGGAAATCACCATCG |
| Dbp1 fwd | GGAACTGAAGCCTCAACCAAT C |
| Dbp1 rev | TCCGGCTCCAGTACTTCTCA |

| Aacs fwd | CGTGTGGTCGGCTATCTACC |
| --- | --- |
| Aacs rev | GCGGTCCAGGACACCATTTA |
| Fabp1 fwd | AGGGGGTGTCAGAAATCGTG |
| Fabp1 rev | CCCCCAGGGTGAACTCATTG |
| B-actin fwd | GGCACCACACCTTCTACAATG |
| B-actin rev | GGGGTGTTGAAGGTCTCAAAC |
| IL-6 fwd | ttccatccagttgccttctt |
| IL-6 rev | atttccacgatttcccagag |
| Tnfa fwd | gcctcttctcattcctgctt |
| Tnfa rev | cacttggtggtttgctacga |
| HGF fwd | AAATGAGAATGGTTCTTGGTG |
| HGF rev | CTGGCCTCTTCTATGGCT |
| PDGF-B fwd | TGTTCCAGATCTCGCGGAAC |
| PDGF-B rev | GCGGCCACACCAGGAAG |
| PDGF-D fwd | GACACTTTTGCGACTCCGC |
| PDGF-D rev | TGTGAGGTGATTGCTCTCATCTC |

**Antibodies used for Western Blotting**

| **Antibody name** | **Manufacturer** | **Catalog Number; RRID** |
| --- | --- | --- |
| Shp2 | Santa Cruz Biotechnologies | Sc-280; RRID:AB_632401 |
| Ikkβ | Cell Signaling Technology | 8943; RRID:AB_11024092 |
| ERK1/2 | Cell Signaling Technology | 4695; RRID:AB_390779 |
| p-ERK1/2 | Cell Signaling Technology | 4370; RRID:AB_2315112 |
| β-actin | Sigma | A5316; RRID:AB_476743 |
| p-IκBα | Cell Signaling Technology | 2859; RRID:AB_561111 |
| p-p65 | Cell Signaling Technology | 3033; RRID:AB_331284 |
| P65 | Cell Signaling Technology | 8242; RRID:AB_10859369 |
| Gapdh | Cell Signaling Technology | 5174; RRID:AB_10622025 |
| p-Akt Ser473 | Cell Signaling Technology | 9272; RRID:AB_329827 |
| Akt | Cell Signaling Technology | 9271; RRID:AB_329825 |
| p-Stat3 | Cell Signaling Technology | 9145; RRID:AB_2491009 |
| Stat3 | Cell Signaling Technology | 9139; RRID:AB_331757 |

**Antibody panels used for flow cytometric analysis**

| **Fluorophore** | **Panel 1 (liver lymphocytes)** | **Panel 2 (liver myeloid cells)** | **Panel 3 (splenic lymphocytes)** | **Panel 4 (splenic myeloid cells)** | **Panel 5 (lymph nodes)** |
| --- | --- | --- | --- | --- | --- |
| Aqua | L/D | L/D |  |  |  |
| FITC | DX5 | Ly6C |  | LY6C |  |
| PE | NK1.1 | CD68 | NK1.1 | CD11c | NK1.1 |
| Percp-Cy5.5 | CD45 | CD45 |  | CD3/CD19 |  |
| Pacific Blue | TCRb | F4/80 | TCRb | F4/80 | TCRb |
| APC | Foxp3 | MHC II | Foxp3 | MHCII | Foxp3 |
| PE-Cy7 | CD8 |  | CD8 |  | CD8 |
| APC-Cy7 | CD19 |  | CD19 | Ly6G | CD19 |
| BV605 | CD4 | CD11b | CD4 | CD11b | CD4 |
| BV711 |  | TCR b/B220 |  |  |  |

**Pathway abbreviations**

| **Abbreviated** | **Original** | **Abbreviated** | **Original** |
| --- | --- | --- | --- |
| AA | AMINO_ACIDS | OLIGOPEP | OLIGOPEPTIDE |
| BIND | BINDING | TG | TRIACYLGLYCEROL |
| KETONE | KETBONE_BODY | FA | FATTY_ACID |
| N | AND | PROTEOSOM_  CATAB | PROTEASOMAL_PROTEIN_  CATABOLIC_PROCESS |
| DERIV | DERIVATIVES | PROTEOSOM_  UBIQ_DEPEND_  CATAB | REGULATION_OF_PROTEASOMAL_UBIQUITIN_  DEPENDENT_PROTEIN_  CATABOLIC_PROCESS |
| REAC | REACTOME | CHRO | CHROMATID |
| LIPOPROT | LIPOPROTEINS | PRESNT | PRESENT_OF_PEPTIDE_  ANTIGEN |
| RECPT | RECEPTORS | ENRGY | ENERGY_DERIVATIVES |
| CASC | CASCADES | PHOSPHO_METAB | PHOSPHORUS_METAB_  PROCESS |
| A1- | CLASS_A1_ | TOPOL_INCORRCT_PROT | TOPOLOGICALLY_  INCORRECT_PROTEIN |
| FCg | FC_GAMMA | TRANSMBR_  TRANS_SMLL_  MOLC | TRANSMEMBRANE_  TRANSPORT_OF_SMALL_  MOLECULE |
| MEDIAT | MEDIATED | GASTRIN_CREB_VIA_PKC_MAPK | GASTRIN_CREB_SIGNAL  _PATH_VIA_PKN_AND_  MAPK |
| MOVE | MOVEMENT | PRECURS_METABLT_N_ENRGY | GENERATION_OF_  PRECURSOR_METABOLITES_AND_ENERGY |
| COMP | COMPLEX | POS_REG_OF_NF_KAPPAB | POSITIVE_REGULATION_  OF_I_KAPPAB_KINASE_NF_KAPPAB_SIGNAL |
| RIBONUCLEOPRO | RIBONUCLEOPROTEIN | MACROMOLEC_METAB | MULTICELLULAR_ORGANISMAL_MACROMOLECULAR_METABOLIC_PROCESS |
| SPLIC | SPLICING | REG_OF_NF_KAPPAB | REG_OF_I_KAPPAB_KINASE_NF_KAPPAB_SIGNL |
| TRANSESTER. | TRANSESTERIFICATION | ORG_CYCLIC_METAB | ORGANIC_CYCLIC_  COMPOUND_CATAB |
| BIOGEN | BIOGENESIS | ORG_HYDROXY_BIOSYN | ORGANIC_HYDROXY_COMPOUND_BIOSYNTHETIC_PROCESS |
| TRANSMBR | TRANSMEMBRANE | NITRGN_COM_METAB | NITROGEN_COMPOUND_  METAB_PROC |
| TRAN | TRANSPORTER | INTERFRN_A_B_SIGNL | INTERFERON_ALPHA_  BETA_SIGNL |
| OLIGOPEP | OLIGOPEPTIDE |  |  |
