# Supplementary material for: Concurrent Disruption of the Ras/MAPK and NF-κB Pathways Induces Circadian Deregulation and Hepatocarcinogenesis
Source: Oxford University Press journal article supplement (doi:10.1158/1541-7786.mcr-21-0479), 2021-11-22
Supplement: mcr-21-0479_supp2.xlsx [file mcr-21-0479_supp2.xlsx]

## Sheet: WT vs DKO liver up GO
NAME	GS<br> follow link to MSigDB	GS DETAILS	SIZE	ES	NES	NOM p-val	FDR q-val	FWER p-val	RANK AT MAX	LEADING EDGE
GO_IMMUNE_SYSTEM_PROCESS	GO_IMMUNE_SYSTEM_PROCESS	Details ...	369	0.217817	4.51176	0	0	0	1146	tags=67%, list=49%, signal=111%
GO_REGULATION_OF_IMMUNE_SYSTEM_PROCESS	GO_REGULATION_OF_IMMUNE_SYSTEM_PROCESS	Details ...	258	0.250829	4.47592	0	0	0	1031	tags=66%, list=44%, signal=105%
GO_BIOLOGICAL_ADHESION	GO_BIOLOGICAL_ADHESION	Details ...	182	0.283462	4.29136	0	0	0	1475	tags=89%, list=63%, signal=221%
GO_MOVEMENT_OF_CELL_OR_SUBCELLULAR_COMPONENT	GO_MOVEMENT_OF_CELL_OR_SUBCELLULAR_COMPONENT	Details ...	215	0.236215	3.86206	0	0	0	1450	tags=83%, list=62%, signal=198%
GO_REGULATION_OF_CYTOKINE_PRODUCTION	GO_REGULATION_OF_CYTOKINE_PRODUCTION	Details ...	117	0.307076	3.83336	0	0	0	1100	tags=76%, list=47%, signal=136%
GO_REGULATION_OF_IMMUNE_RESPONSE	GO_REGULATION_OF_IMMUNE_RESPONSE	Details ...	171	0.257442	3.80976	0	0	0	1100	tags=71%, list=47%, signal=123%
GO_LOCOMOTION	GO_LOCOMOTION	Details ...	208	0.234535	3.77597	0	0	0	1450	tags=83%, list=62%, signal=198%
GO_POSITIVE_REGULATION_OF_CYTOKINE_PRODUCTION	GO_POSITIVE_REGULATION_OF_CYTOKINE_PRODUCTION	Details ...	85	0.352089	3.773	0	0	0	1053	tags=79%, list=45%, signal=138%
GO_IMMUNE_RESPONSE	GO_IMMUNE_RESPONSE	Details ...	210	0.236656	3.7682	0	0	0	1036	tags=66%, list=44%, signal=107%
GO_MITOTIC_NUCLEAR_DIVISION	GO_MITOTIC_NUCLEAR_DIVISION	Details ...	62	0.405709	3.76656	0	0	0	700	tags=69%, list=30%, signal=96%
GO_LEUKOCYTE_MIGRATION	GO_LEUKOCYTE_MIGRATION	Details ...	74	0.372852	3.75376	0	0	0	928	tags=76%, list=40%, signal=121%
GO_POSITIVE_REGULATION_OF_IMMUNE_SYSTEM_PROCESS	GO_POSITIVE_REGULATION_OF_IMMUNE_SYSTEM_PROCESS	Details ...	189	0.24384	3.7481	0	0	0	1100	tags=69%, list=47%, signal=120%
GO_SISTER_CHROMATID_SEGREGATION	GO_SISTER_CHROMATID_SEGREGATION	Details ...	34	0.54047	3.68371	0	0	0	682	tags=82%, list=29%, signal=114%
GO_LEUKOCYTE_ACTIVATION	GO_LEUKOCYTE_ACTIVATION	Details ...	92	0.326453	3.66738	0	0	0	998	tags=74%, list=43%, signal=124%
GO_DEFENSE_RESPONSE	GO_DEFENSE_RESPONSE	Details ...	231	0.217996	3.64968	0	0	0	1113	tags=67%, list=47%, signal=115%
GO_ORGANELLE_FISSION	GO_ORGANELLE_FISSION	Details ...	76	0.357765	3.63788	0	0	0	700	tags=64%, list=30%, signal=89%
GO_CHROMOSOME_SEGREGATION	GO_CHROMOSOME_SEGREGATION	Details ...	45	0.462257	3.62444	0	0	0	865	tags=82%, list=37%, signal=128%
GO_MITOTIC_SISTER_CHROMATID_SEGREGATION	GO_MITOTIC_SISTER_CHROMATID_SEGREGATION	Details ...	23	0.613221	3.55012	0	0	0	615	tags=87%, list=26%, signal=117%
GO_REGULATION_OF_CELL_ACTIVATION	GO_REGULATION_OF_CELL_ACTIVATION	Details ...	96	0.314591	3.50779	0	0	0	1076	tags=76%, list=46%, signal=135%
GO_NUCLEAR_CHROMOSOME_SEGREGATION	GO_NUCLEAR_CHROMOSOME_SEGREGATION	Details ...	39	0.485392	3.4835	0	0	0	865	tags=85%, list=37%, signal=132%
GO_LEUKOCYTE_CHEMOTAXIS	GO_LEUKOCYTE_CHEMOTAXIS		36	0.485342	3.46455	0	0	0	964	tags=89%, list=41%, signal=148%
GO_CELL_MOTILITY	GO_CELL_MOTILITY		161	0.237303	3.39447	0	0	0	1303	tags=78%, list=55%, signal=162%
GO_CELL_ACTIVATION	GO_CELL_ACTIVATION		118	0.274782	3.37388	0	0	0	998	tags=69%, list=43%, signal=113%
GO_EXTRACELLULAR_STRUCTURE_ORGANIZATION	GO_EXTRACELLULAR_STRUCTURE_ORGANIZATION		84	0.323448	3.36883	0	0	0	1447	tags=93%, list=62%, signal=233%
GO_POSITIVE_REGULATION_OF_MULTICELLULAR_ORGANISMAL_PROCESS	GO_POSITIVE_REGULATION_OF_MULTICELLULAR_ORGANISMAL_PROCESS		250	0.193148	3.33031	0	0	0	1444	tags=79%, list=61%, signal=183%
GO_POSITIVE_REGULATION_OF_RESPONSE_TO_STIMULUS	GO_POSITIVE_REGULATION_OF_RESPONSE_TO_STIMULUS		322	0.167907	3.25129	0	0	0	1212	tags=66%, list=52%, signal=118%
GO_POSITIVE_REGULATION_OF_CELL_ACTIVATION	GO_POSITIVE_REGULATION_OF_CELL_ACTIVATION		62	0.351621	3.22737	0	0	0	1013	tags=77%, list=43%, signal=133%
GO_MITOTIC_SPINDLE_ORGANIZATION	GO_MITOTIC_SPINDLE_ORGANIZATION		17	0.631817	3.17168	0	0	0	598	tags=88%, list=25%, signal=118%
GO_NEGATIVE_REGULATION_OF_IMMUNE_SYSTEM_PROCESS	GO_NEGATIVE_REGULATION_OF_IMMUNE_SYSTEM_PROCESS		70	0.32235	3.14159	0	0	0	1076	tags=77%, list=46%, signal=138%
GO_POSITIVE_REGULATION_OF_IMMUNE_RESPONSE	GO_POSITIVE_REGULATION_OF_IMMUNE_RESPONSE		113	0.251141	3.12082	0	0	0	1100	tags=71%, list=47%, signal=127%
GO_REGULATION_OF_CELL_ADHESION	GO_REGULATION_OF_CELL_ADHESION		126	0.242389	3.09997	0	0	0	1268	tags=77%, list=54%, signal=158%
GO_RESPONSE_TO_EXTERNAL_STIMULUS	GO_RESPONSE_TO_EXTERNAL_STIMULUS		310	0.159093	3.07765	0	0	0	1485	tags=77%, list=63%, signal=182%
GO_CELL_DIVISION	GO_CELL_DIVISION		69	0.319534	3.06885	0	0	0	700	tags=61%, list=30%, signal=84%
GO_REGULATION_OF_CELL_CELL_ADHESION	GO_REGULATION_OF_CELL_CELL_ADHESION		74	0.301731	3.0503	0	0	0	1058	tags=74%, list=45%, signal=131%
GO_CELL_CELL_ADHESION	GO_CELL_CELL_ADHESION		100	0.263897	3.04684	0	0	0	1472	tags=88%, list=63%, signal=226%
GO_POSITIVE_REGULATION_OF_CELL_CELL_ADHESION	GO_POSITIVE_REGULATION_OF_CELL_CELL_ADHESION		50	0.36832	3.03623	0	0	0	1031	tags=80%, list=44%, signal=140%
GO_REGULATION_OF_MICROTUBULE_POLYMERIZATION_OR_DEPOLYMERIZATION	GO_REGULATION_OF_MICROTUBULE_POLYMERIZATION_OR_DEPOLYMERIZATION		31	0.464742	3.03385	0	0	0	740	tags=77%, list=32%, signal=112%
GO_SINGLE_ORGANISM_CELL_ADHESION	GO_SINGLE_ORGANISM_CELL_ADHESION		93	0.27041	2.98934	0	0	0	1510	tags=90%, list=64%, signal=243%
GO_LEUKOCYTE_CELL_CELL_ADHESION	GO_LEUKOCYTE_CELL_CELL_ADHESION		55	0.342053	2.98448	0	0	0	965	tags=75%, list=41%, signal=124%
GO_REGULATION_OF_CHROMOSOME_SEGREGATION	GO_REGULATION_OF_CHROMOSOME_SEGREGATION		15	0.62769	2.97928	0	0	0	413	tags=80%, list=18%, signal=96%
GO_POSITIVE_REGULATION_OF_CELLULAR_COMPONENT_ORGANIZATION	GO_POSITIVE_REGULATION_OF_CELLULAR_COMPONENT_ORGANIZATION		183	0.193735	2.94494	0	0	0	1440	tags=79%, list=61%, signal=189%
GO_INFLAMMATORY_RESPONSE	GO_INFLAMMATORY_RESPONSE		108	0.250017	2.94433	0	0	0	1113	tags=71%, list=47%, signal=129%
GO_REGULATION_OF_CELL_DIFFERENTIATION	GO_REGULATION_OF_CELL_DIFFERENTIATION		222	0.173176	2.92558	0	0	0	1450	tags=77%, list=62%, signal=183%
GO_REGULATION_OF_TRANSPORT	GO_REGULATION_OF_TRANSPORT		269	0.162364	2.91458	0	0	0	1477	tags=77%, list=63%, signal=185%
GO_REGULATION_OF_CYTOSKELETON_ORGANIZATION	GO_REGULATION_OF_CYTOSKELETON_ORGANIZATION		93	0.262876	2.90695	0	0	0	1426	tags=86%, list=61%, signal=210%
GO_POSITIVE_REGULATION_OF_TRANSPORT	GO_POSITIVE_REGULATION_OF_TRANSPORT		159	0.198712	2.89149	0	6.34e-05	0.002	1469	tags=81%, list=63%, signal=202%
GO_REGULATION_OF_LEUKOCYTE_MIGRATION	GO_REGULATION_OF_LEUKOCYTE_MIGRATION		49	0.343619	2.87822	0	9.25e-05	0.003	982	tags=76%, list=42%, signal=127%
GO_MYELOID_LEUKOCYTE_ACTIVATION	GO_MYELOID_LEUKOCYTE_ACTIVATION		33	0.430342	2.86294	0	0.00012	0.004	995	tags=85%, list=42%, signal=145%
GO_REGULATION_OF_ORGANELLE_ORGANIZATION	GO_REGULATION_OF_ORGANELLE_ORGANIZATION		163	0.198919	2.86102	0	0.000117	0.004	1437	tags=80%, list=61%, signal=191%
GO_POSITIVE_REGULATION_OF_CELL_ADHESION	GO_POSITIVE_REGULATION_OF_CELL_ADHESION		74	0.293102	2.85445	0	0.000143	0.005	1268	tags=82%, list=54%, signal=174%
GO_MYELOID_LEUKOCYTE_MIGRATION	GO_MYELOID_LEUKOCYTE_MIGRATION		25	0.474059	2.83232	0	0.00014	0.005	964	tags=88%, list=41%, signal=148%
GO_REGULATION_OF_MULTICELLULAR_ORGANISMAL_DEVELOPMENT	GO_REGULATION_OF_MULTICELLULAR_ORGANISMAL_DEVELOPMENT		249	0.166782	2.82507	0	0.000137	0.005	1450	tags=77%, list=62%, signal=179%
GO_LYMPHOCYTE_ACTIVATION	GO_LYMPHOCYTE_ACTIVATION		74	0.286256	2.82423	0	0.000135	0.005	998	tags=70%, list=43%, signal=118%
GO_NEGATIVE_REGULATION_OF_MULTICELLULAR_ORGANISMAL_PROCESS	GO_NEGATIVE_REGULATION_OF_MULTICELLULAR_ORGANISMAL_PROCESS		169	0.193572	2.79946	0	0.000185	0.007	1300	tags=73%, list=55%, signal=153%
GO_REGULATION_OF_CELLULAR_LOCALIZATION	GO_REGULATION_OF_CELLULAR_LOCALIZATION		179	0.18426	2.79438	0	0.000208	0.008	1462	tags=79%, list=62%, signal=194%
GO_ENDOCYTOSIS	GO_ENDOCYTOSIS		101	0.237558	2.78636	0	0.000229	0.009	1418	tags=83%, list=60%, signal=201%
GO_REGULATION_OF_DEFENSE_RESPONSE	GO_REGULATION_OF_DEFENSE_RESPONSE		149	0.20488	2.78472	0	0.000225	0.009	1014	tags=62%, list=43%, signal=103%
GO_SISTER_CHROMATID_COHESION	GO_SISTER_CHROMATID_COHESION		17	0.56565	2.78017	0	0.000222	0.009	476	tags=76%, list=20%, signal=95%
GO_MITOTIC_CELL_CYCLE	GO_MITOTIC_CELL_CYCLE		117	0.220027	2.76729	0	0.000218	0.009	1234	tags=74%, list=53%, signal=147%
GO_REGULATION_OF_PROTEIN_LOCALIZATION	GO_REGULATION_OF_PROTEIN_LOCALIZATION		136	0.207106	2.74675	0	0.000356	0.015	1440	tags=81%, list=61%, signal=197%
GO_CELL_CYCLE	GO_CELL_CYCLE		174	0.1892	2.72331	0	0.000468	0.02	1180	tags=68%, list=50%, signal=126%
GO_REGULATION_OF_LEUKOCYTE_PROLIFERATION	GO_REGULATION_OF_LEUKOCYTE_PROLIFERATION		48	0.339928	2.70796	0	0.000531	0.023	1076	tags=79%, list=46%, signal=143%
GO_IMMUNE_EFFECTOR_PROCESS	GO_IMMUNE_EFFECTOR_PROCESS		98	0.235066	2.70624	0	0.000522	0.023	1291	tags=78%, list=55%, signal=165%
GO_REGULATION_OF_MICROTUBULE_BASED_PROCESS	GO_REGULATION_OF_MICROTUBULE_BASED_PROCESS		36	0.384756	2.69925	0	0.000514	0.023	740	tags=69%, list=32%, signal=100%
GO_POSITIVE_REGULATION_OF_IMMUNE_EFFECTOR_PROCESS	GO_POSITIVE_REGULATION_OF_IMMUNE_EFFECTOR_PROCESS		29	0.417064	2.69331	0	0.000551	0.025	975	tags=83%, list=42%, signal=140%
GO_REGULATION_OF_CELLULAR_COMPONENT_MOVEMENT	GO_REGULATION_OF_CELLULAR_COMPONENT_MOVEMENT		167	0.187916	2.69272	0	0.000542	0.025	1431	tags=78%, list=61%, signal=187%
GO_RESPONSE_TO_WOUNDING	GO_RESPONSE_TO_WOUNDING		124	0.213289	2.68494	0	0.000556	0.026	1475	tags=83%, list=63%, signal=212%
GO_POSITIVE_REGULATION_OF_DEFENSE_RESPONSE	GO_POSITIVE_REGULATION_OF_DEFENSE_RESPONSE		81	0.261721	2.68413	0	0.000569	0.027	1000	tags=68%, list=43%, signal=114%
GO_LEUKOCYTE_DIFFERENTIATION	GO_LEUKOCYTE_DIFFERENTIATION		66	0.279354	2.67689	0	0.000582	0.028	998	tags=70%, list=43%, signal=118%
GO_CELL_DEVELOPMENT	GO_CELL_DEVELOPMENT		180	0.176322	2.66125	0	0.000593	0.029	1456	tags=78%, list=62%, signal=190%
GO_INTRACELLULAR_SIGNAL_TRANSDUCTION	GO_INTRACELLULAR_SIGNAL_TRANSDUCTION		242	0.154776	2.64763	0	0.000624	0.031	1468	tags=76%, list=63%, signal=183%
GO_REGULATION_OF_PROTEIN_COMPLEX_DISASSEMBLY	GO_REGULATION_OF_PROTEIN_COMPLEX_DISASSEMBLY		37	0.370145	2.64763	0	0.000616	0.031	857	tags=73%, list=36%, signal=113%
GO_IMMUNE_RESPONSE_REGULATING_CELL_SURFACE_RECEPTOR_SIGNALING_PATHWAY	GO_IMMUNE_RESPONSE_REGULATING_CELL_SURFACE_RECEPTOR_SIGNALING_PATHWAY		51	0.305847	2.63313	0	0.000687	0.034	1092	tags=76%, list=47%, signal=140%
GO_CELL_CYCLE_PROCESS	GO_CELL_CYCLE_PROCESS		151	0.188855	2.63136	0	0.000678	0.034	1279	tags=72%, list=54%, signal=148%
GO_REGULATION_OF_HOMOTYPIC_CELL_CELL_ADHESION	GO_REGULATION_OF_HOMOTYPIC_CELL_CELL_ADHESION		60	0.289714	2.62833	0	0.000669	0.034	1058	tags=73%, list=45%, signal=130%
GO_POSITIVE_REGULATION_OF_MOLECULAR_FUNCTION	GO_POSITIVE_REGULATION_OF_MOLECULAR_FUNCTION		281	0.14546	2.62355	0	0.000679	0.034	1428	tags=74%, list=61%, signal=166%
GO_POSITIVE_REGULATION_OF_RESPONSE_TO_EXTERNAL_STIMULUS	GO_POSITIVE_REGULATION_OF_RESPONSE_TO_EXTERNAL_STIMULUS		65	0.282375	2.61998	0	0.000689	0.035	1016	tags=71%, list=43%, signal=121%
GO_CELL_CHEMOTAXIS	GO_CELL_CHEMOTAXIS		50	0.317493	2.61904	0	0.00068	0.035	913	tags=70%, list=39%, signal=112%
GO_MICROTUBULE_BASED_PROCESS	GO_MICROTUBULE_BASED_PROCESS		63	0.276913	2.60625	0	0.000815	0.042	298	tags=40%, list=13%, signal=44%
GO_RESPONSE_TO_BACTERIUM	GO_RESPONSE_TO_BACTERIUM		97	0.231279	2.59489	0	0.000894	0.047	1076	tags=68%, list=46%, signal=120%
GO_INNATE_IMMUNE_RESPONSE	GO_INNATE_IMMUNE_RESPONSE		123	0.204443	2.59163	0	0.000901	0.048	1014	tags=63%, list=43%, signal=104%
GO_REGULATION_OF_LEUKOCYTE_MEDIATED_IMMUNITY	GO_REGULATION_OF_LEUKOCYTE_MEDIATED_IMMUNITY		37	0.364684	2.58607	0	0.000908	0.049	1060	tags=81%, list=45%, signal=145%
GO_TAXIS	GO_TAXIS		98	0.226086	2.58346	0	0.000915	0.05	1431	tags=83%, list=61%, signal=203%
GO_DIVALENT_INORGANIC_CATION_HOMEOSTASIS	GO_DIVALENT_INORGANIC_CATION_HOMEOSTASIS		54	0.298863	2.57022	0	0.00100529	0.056	1444	tags=91%, list=61%, signal=230%
GO_GRANULOCYTE_MIGRATION	GO_GRANULOCYTE_MIGRATION		21	0.472098	2.55699	0	0.00105931	0.06	913	tags=86%, list=39%, signal=139%
GO_IMMUNE_SYSTEM_DEVELOPMENT	GO_IMMUNE_SYSTEM_DEVELOPMENT		112	0.209845	2.54457	0	0.0011123	0.064	1165	tags=70%, list=50%, signal=132%
GO_NEGATIVE_REGULATION_OF_PROTEIN_COMPLEX_DISASSEMBLY	GO_NEGATIVE_REGULATION_OF_PROTEIN_COMPLEX_DISASSEMBLY		29	0.397734	2.52063	0	0.00129379	0.076	615	tags=66%, list=26%, signal=88%
GO_REGULATION_OF_IMMUNE_EFFECTOR_PROCESS	GO_REGULATION_OF_IMMUNE_EFFECTOR_PROCESS		80	0.239242	2.50444	0	0.00147329	0.086	1100	tags=70%, list=47%, signal=127%
GO_WOUND_HEALING	GO_WOUND_HEALING		104	0.218891	2.49287	0	0.00148824	0.088	1472	tags=84%, list=63%, signal=214%
GO_POSITIVE_REGULATION_OF_INFLAMMATORY_RESPONSE	GO_POSITIVE_REGULATION_OF_INFLAMMATORY_RESPONSE		27	0.400769	2.49161	0	0.00155168	0.093	982	tags=81%, list=42%, signal=138%
GO_REGULATION_OF_CYTOKINE_SECRETION	GO_REGULATION_OF_CYTOKINE_SECRETION		38	0.337343	2.48514	0	0.0016438	0.1	1197	tags=84%, list=51%, signal=169%
GO_REGULATION_OF_INTERLEUKIN_6_PRODUCTION	GO_REGULATION_OF_INTERLEUKIN_6_PRODUCTION		35	0.351912	2.47844	0	0.00171922	0.105	728	tags=66%, list=31%, signal=94%
GO_RESPONSE_TO_BIOTIC_STIMULUS	GO_RESPONSE_TO_BIOTIC_STIMULUS		146	0.179221	2.47715	0	0.00176377	0.108	1100	tags=64%, list=47%, signal=112%
GO_SMALL_GTPASE_MEDIATED_SIGNAL_TRANSDUCTION	GO_SMALL_GTPASE_MEDIATED_SIGNAL_TRANSDUCTION		58	0.279521	2.47201	0	0.00182056	0.113	1464	tags=90%, list=62%, signal=232%
GO_REGULATION_OF_TUMOR_NECROSIS_FACTOR_SUPERFAMILY_CYTOKINE_PRODUCTION	GO_REGULATION_OF_TUMOR_NECROSIS_FACTOR_SUPERFAMILY_CYTOKINE_PRODUCTION		35	0.354073	2.46551	0	0.00183179	0.115	723	tags=66%, list=31%, signal=94%
GO_POSITIVE_REGULATION_OF_LEUKOCYTE_MIGRATION	GO_POSITIVE_REGULATION_OF_LEUKOCYTE_MIGRATION		39	0.336132	2.45711	0	0.0019314	0.121	728	tags=64%, list=31%, signal=91%
GO_POSITIVE_REGULATION_OF_LEUKOCYTE_PROLIFERATION	GO_POSITIVE_REGULATION_OF_LEUKOCYTE_PROLIFERATION		31	0.375513	2.45157	0	0.00194021	0.123	871	tags=74%, list=37%, signal=116%
GO_REGULATION_OF_ACTIN_FILAMENT_BASED_PROCESS	GO_REGULATION_OF_ACTIN_FILAMENT_BASED_PROCESS		60	0.262587	2.44391	0	0.00202239	0.129	1394	tags=85%, list=59%, signal=204%
GO_LYMPHOCYTE_DIFFERENTIATION	GO_LYMPHOCYTE_DIFFERENTIATION		45	0.31388	2.43529	0	0.00220302	0.141	998	tags=73%, list=43%, signal=125%
GO_RESPONSE_TO_TUMOR_NECROSIS_FACTOR	GO_RESPONSE_TO_TUMOR_NECROSIS_FACTOR		34	0.348137	2.42352	0	0.00243683	0.152	1058	tags=79%, list=45%, signal=142%
GO_NEGATIVE_REGULATION_OF_CELLULAR_COMPONENT_ORGANIZATION	GO_NEGATIVE_REGULATION_OF_CELLULAR_COMPONENT_ORGANIZATION		105	0.203911	2.41992	0.00204499	0.00252652	0.157	615	tags=46%, list=26%, signal=59%
GO_REGULATION_OF_PROTEIN_SECRETION	GO_REGULATION_OF_PROTEIN_SECRETION		72	0.247657	2.41915	0	0.00251586	0.158	1392	tags=83%, list=59%, signal=198%
GO_POSITIVE_REGULATION_OF_DEVELOPMENTAL_PROCESS	GO_POSITIVE_REGULATION_OF_DEVELOPMENTAL_PROCESS		187	0.156397	2.40812	0	0.00271293	0.171	1444	tags=76%, list=61%, signal=182%
GO_POSITIVE_REGULATION_OF_CATALYTIC_ACTIVITY	GO_POSITIVE_REGULATION_OF_CATALYTIC_ACTIVITY		243	0.138211	2.37771	0	0.00335548	0.207	1428	tags=73%, list=61%, signal=168%
GO_REGULATION_OF_INTRACELLULAR_SIGNAL_TRANSDUCTION	GO_REGULATION_OF_INTRACELLULAR_SIGNAL_TRANSDUCTION		274	0.128828	2.37271	0	0.00341779	0.213	1300	tags=67%, list=55%, signal=132%
GO_REGULATION_OF_CELL_PROLIFERATION	GO_REGULATION_OF_CELL_PROLIFERATION		238	0.140105	2.36928	0	0.00347928	0.219	1272	tags=67%, list=54%, signal=131%
GO_CELL_SUBSTRATE_ADHESION	GO_CELL_SUBSTRATE_ADHESION		36	0.333237	2.36912	0	0.00344677	0.219	1120	tags=81%, list=48%, signal=152%
GO_ANTIGEN_PROCESSING_AND_PRESENTATION_OF_PEPTIDE_ANTIGEN	GO_ANTIGEN_PROCESSING_AND_PRESENTATION_OF_PEPTIDE_ANTIGEN		24	0.397375	2.36651	0	0.00346726	0.222	1130	tags=88%, list=48%, signal=167%
GO_REGULATION_OF_T_CELL_PROLIFERATION	GO_REGULATION_OF_T_CELL_PROLIFERATION		31	0.360185	2.36618	0	0.00344818	0.223	1058	tags=81%, list=45%, signal=145%
GO_POSITIVE_REGULATION_OF_TUMOR_NECROSIS_FACTOR_SUPERFAMILY_CYTOKINE_PRODUCTION	GO_POSITIVE_REGULATION_OF_TUMOR_NECROSIS_FACTOR_SUPERFAMILY_CYTOKINE_PRODUCTION		25	0.392802	2.34966	0	0.0037918	0.248	871	tags=76%, list=37%, signal=120%
GO_RESPONSE_TO_MOLECULE_OF_BACTERIAL_ORIGIN	GO_RESPONSE_TO_MOLECULE_OF_BACTERIAL_ORIGIN		79	0.232685	2.34763	0	0.00377051	0.249	1076	tags=68%, list=46%, signal=122%
GO_REGULATION_OF_METAL_ION_TRANSPORT	GO_REGULATION_OF_METAL_ION_TRANSPORT		60	0.260519	2.34537	0	0.00381261	0.255	1477	tags=88%, list=63%, signal=232%
GO_ACTIVATION_OF_IMMUNE_RESPONSE	GO_ACTIVATION_OF_IMMUNE_RESPONSE		97	0.209863	2.34272	0	0.00386705	0.261	1100	tags=67%, list=47%, signal=121%
GO_VESICLE_MEDIATED_TRANSPORT	GO_VESICLE_MEDIATED_TRANSPORT		176	0.157459	2.33965	0.00189394	0.00391966	0.267	1418	tags=75%, list=60%, signal=175%
GO_NEGATIVE_REGULATION_OF_RESPONSE_TO_EXTERNAL_STIMULUS	GO_NEGATIVE_REGULATION_OF_RESPONSE_TO_EXTERNAL_STIMULUS		62	0.256752	2.33816	0	0.00395924	0.272	1192	tags=76%, list=51%, signal=150%
GO_DEFENSE_RESPONSE_TO_OTHER_ORGANISM	GO_DEFENSE_RESPONSE_TO_OTHER_ORGANISM		77	0.226841	2.33771	0.00204918	0.00392511	0.272	1100	tags=69%, list=47%, signal=125%
GO_DEFENSE_RESPONSE_TO_BACTERIUM	GO_DEFENSE_RESPONSE_TO_BACTERIUM		35	0.344278	2.33288	0	0.00406063	0.281	1014	tags=77%, list=43%, signal=134%
GO_CELLULAR_CHEMICAL_HOMEOSTASIS	GO_CELLULAR_CHEMICAL_HOMEOSTASIS		99	0.201144	2.32892	0.00199203	0.00412247	0.284	1444	tags=81%, list=61%, signal=201%
GO_REGULATION_OF_CYTOSOLIC_CALCIUM_ION_CONCENTRATION	GO_REGULATION_OF_CYTOSOLIC_CALCIUM_ION_CONCENTRATION		32	0.35109	2.32779	0.00208333	0.00412399	0.286	1167	tags=84%, list=50%, signal=165%
GO_RESPONSE_TO_CYTOKINE	GO_RESPONSE_TO_CYTOKINE		132	0.175637	2.32546	0	0.00417362	0.292	1353	tags=74%, list=58%, signal=165%
GO_PHAGOCYTOSIS	GO_PHAGOCYTOSIS		43	0.298814	2.32498	0.00379507	0.00413912	0.292	1276	tags=84%, list=54%, signal=180%
GO_CELL_ACTIVATION_INVOLVED_IN_IMMUNE_RESPONSE	GO_CELL_ACTIVATION_INVOLVED_IN_IMMUNE_RESPONSE		33	0.338137	2.30667	0.0019802	0.00461381	0.329	995	tags=76%, list=42%, signal=130%
GO_REGULATION_OF_NUCLEAR_DIVISION	GO_REGULATION_OF_NUCLEAR_DIVISION		24	0.400459	2.304	0	0.00463339	0.332	438	tags=58%, list=19%, signal=71%
GO_POSITIVE_REGULATION_OF_PHOSPHORUS_METABOLIC_PROCESS	GO_POSITIVE_REGULATION_OF_PHOSPHORUS_METABOLIC_PROCESS		172	0.157522	2.29833	0.00204499	0.00481332	0.343	1035	tags=59%, list=44%, signal=97%
GO_POSITIVE_REGULATION_OF_LYMPHOCYTE_DIFFERENTIATION	GO_POSITIVE_REGULATION_OF_LYMPHOCYTE_DIFFERENTIATION		20	0.438058	2.29738	0	0.00479749	0.343	975	tags=85%, list=42%, signal=144%
GO_POSITIVE_REGULATION_OF_HYDROLASE_ACTIVITY	GO_POSITIVE_REGULATION_OF_HYDROLASE_ACTIVITY		152	0.162772	2.29088	0.00193424	0.00490344	0.352	1418	tags=76%, list=60%, signal=179%
GO_PROTEIN_COMPLEX_SUBUNIT_ORGANIZATION	GO_PROTEIN_COMPLEX_SUBUNIT_ORGANIZATION		205	0.146153	2.28504	0	0.00500874	0.357	1736	tags=87%, list=74%, signal=306%
GO_REGULATION_OF_ANATOMICAL_STRUCTURE_MORPHOGENESIS	GO_REGULATION_OF_ANATOMICAL_STRUCTURE_MORPHOGENESIS		159	0.160275	2.27718	0	0.00530401	0.379	1435	tags=76%, list=61%, signal=182%
GO_TISSUE_DEVELOPMENT	GO_TISSUE_DEVELOPMENT		246	0.130201	2.26631	0.00197239	0.00567062	0.398	1472	tags=74%, list=63%, signal=179%
GO_REGULATION_OF_ANATOMICAL_STRUCTURE_SIZE	GO_REGULATION_OF_ANATOMICAL_STRUCTURE_SIZE		87	0.210181	2.26593	0.00590551	0.00567044	0.401	1359	tags=78%, list=58%, signal=179%
GO_RESPONSE_TO_ABIOTIC_STIMULUS	GO_RESPONSE_TO_ABIOTIC_STIMULUS		171	0.155219	2.26297	0	0.00571214	0.405	1350	tags=72%, list=57%, signal=157%
GO_RESPONSE_TO_MECHANICAL_STIMULUS	GO_RESPONSE_TO_MECHANICAL_STIMULUS		36	0.319252	2.25154	0	0.00603272	0.425	1348	tags=89%, list=57%, signal=206%
GO_POSITIVE_REGULATION_OF_LEUKOCYTE_CHEMOTAXIS	GO_POSITIVE_REGULATION_OF_LEUKOCYTE_CHEMOTAXIS		29	0.344218	2.24045	0.00207039	0.00646709	0.449	982	tags=76%, list=42%, signal=129%
GO_POSITIVE_REGULATION_OF_CYTOSKELETON_ORGANIZATION	GO_POSITIVE_REGULATION_OF_CYTOSKELETON_ORGANIZATION		34	0.318267	2.23777	0.00205339	0.00649326	0.452	989	tags=74%, list=42%, signal=125%
GO_REGULATION_OF_CELLULAR_COMPONENT_SIZE	GO_REGULATION_OF_CELLULAR_COMPONENT_SIZE		61	0.245106	2.23546	0	0.00651882	0.455	1517	tags=89%, list=65%, signal=244%
GO_POSITIVE_REGULATION_OF_T_CELL_PROLIFERATION	GO_POSITIVE_REGULATION_OF_T_CELL_PROLIFERATION		22	0.405143	2.23252	0	0.00655464	0.46	871	tags=77%, list=37%, signal=122%
GO_REGULATION_OF_PRODUCTION_OF_MOLECULAR_MEDIATOR_OF_IMMUNE_RESPONSE	GO_REGULATION_OF_PRODUCTION_OF_MOLECULAR_MEDIATOR_OF_IMMUNE_RESPONSE		20	0.428179	2.2275	0	0.00670563	0.466	998	tags=85%, list=43%, signal=147%
GO_NEGATIVE_REGULATION_OF_CELL_ACTIVATION	GO_NEGATIVE_REGULATION_OF_CELL_ACTIVATION		41	0.295125	2.22481	0.00210526	0.00675075	0.471	1208	tags=80%, list=51%, signal=163%
GO_POSITIVE_REGULATION_OF_INTERLEUKIN_6_PRODUCTION	GO_POSITIVE_REGULATION_OF_INTERLEUKIN_6_PRODUCTION		23	0.388985	2.22176	0.00194932	0.00685605	0.479	728	tags=70%, list=31%, signal=100%
GO_NEGATIVE_REGULATION_OF_IMMUNE_EFFECTOR_PROCESS	GO_NEGATIVE_REGULATION_OF_IMMUNE_EFFECTOR_PROCESS		24	0.372849	2.21654	0.00198807	0.00713301	0.499	600	tags=63%, list=26%, signal=83%
GO_CELLULAR_RESPONSE_TO_ORGANIC_SUBSTANCE	GO_CELLULAR_RESPONSE_TO_ORGANIC_SUBSTANCE		311	0.11439	2.21215	0.00409836	0.00728264	0.508	1510	tags=74%, list=64%, signal=181%
GO_REGULATION_OF_SEQUENCE_SPECIFIC_DNA_BINDING_TRANSCRIPTION_FACTOR_ACTIVITY	GO_REGULATION_OF_SEQUENCE_SPECIFIC_DNA_BINDING_TRANSCRIPTION_FACTOR_ACTIVITY		62	0.243191	2.2108	0	0.0073201	0.509	1223	tags=76%, list=52%, signal=154%
GO_REGULATION_OF_PHOSPHORUS_METABOLIC_PROCESS	GO_REGULATION_OF_PHOSPHORUS_METABOLIC_PROCESS		253	0.123816	2.20506	0	0.00756817	0.52	844	tags=47%, list=36%, signal=66%
GO_MICROTUBULE_CYTOSKELETON_ORGANIZATION	GO_MICROTUBULE_CYTOSKELETON_ORGANIZATION		50	0.270548	2.20071	0.00186916	0.00776091	0.534	880	tags=64%, list=37%, signal=100%
GO_POSITIVE_REGULATION_OF_RESPONSE_TO_WOUNDING	GO_POSITIVE_REGULATION_OF_RESPONSE_TO_WOUNDING		39	0.300885	2.20038	0.00203252	0.00773754	0.536	990	tags=72%, list=42%, signal=122%
GO_POSITIVE_REGULATION_OF_ORGANELLE_ORGANIZATION	GO_POSITIVE_REGULATION_OF_ORGANELLE_ORGANIZATION		84	0.208901	2.19791	0.00195695	0.00783226	0.542	728	tags=51%, list=31%, signal=72%
GO_REGULATION_OF_RESPONSE_TO_EXTERNAL_STIMULUS	GO_REGULATION_OF_RESPONSE_TO_EXTERNAL_STIMULUS		170	0.148841	2.19695	0.00199601	0.00780853	0.545	1056	tags=59%, list=45%, signal=99%
GO_REGULATION_OF_HEMOPOIESIS	GO_REGULATION_OF_HEMOPOIESIS		59	0.24162	2.19632	0.00630252	0.00781248	0.546	998	tags=66%, list=43%, signal=112%
GO_REGULATION_OF_INNATE_IMMUNE_RESPONSE	GO_REGULATION_OF_INNATE_IMMUNE_RESPONSE		73	0.222526	2.18886	0.0020202	0.00820154	0.563	715	tags=52%, list=30%, signal=73%
GO_CYTOKINESIS	GO_CYTOKINESIS		21	0.395666	2.18607	0	0.00828876	0.569	420	tags=57%, list=18%, signal=69%
GO_REGULATION_OF_B_CELL_PROLIFERATION	GO_REGULATION_OF_B_CELL_PROLIFERATION		17	0.434476	2.18503	0	0.00829999	0.569	1058	tags=88%, list=45%, signal=159%
GO_ANTIGEN_RECEPTOR_MEDIATED_SIGNALING_PATHWAY	GO_ANTIGEN_RECEPTOR_MEDIATED_SIGNALING_PATHWAY		29	0.33946	2.18337	0	0.00835791	0.577	1074	tags=79%, list=46%, signal=144%
GO_CELLULAR_RESPONSE_TO_BIOTIC_STIMULUS	GO_CELLULAR_RESPONSE_TO_BIOTIC_STIMULUS		42	0.285054	2.17616	0.0019305	0.00880683	0.594	907	tags=67%, list=39%, signal=107%
GO_REGULATION_OF_INTRINSIC_APOPTOTIC_SIGNALING_PATHWAY	GO_REGULATION_OF_INTRINSIC_APOPTOTIC_SIGNALING_PATHWAY		17	0.427133	2.17424	0.00189394	0.00883333	0.596	937	tags=82%, list=40%, signal=136%
GO_CHROMOSOME_ORGANIZATION	GO_CHROMOSOME_ORGANIZATION		100	0.189235	2.17304	0.00403226	0.00883151	0.599	865	tags=55%, list=37%, signal=83%
GO_NEUROGENESIS	GO_NEUROGENESIS		170	0.146049	2.17072	0.00209644	0.00891034	0.606	1435	tags=75%, list=61%, signal=178%
GO_NEGATIVE_REGULATION_OF_RESPONSE_TO_STIMULUS	GO_NEGATIVE_REGULATION_OF_RESPONSE_TO_STIMULUS		216	0.131445	2.16771	0.00204499	0.00903552	0.617	1208	tags=63%, list=51%, signal=119%
GO_ION_HOMEOSTASIS	GO_ION_HOMEOSTASIS		98	0.188363	2.16004	0.00212766	0.00935574	0.635	1444	tags=80%, list=61%, signal=198%
GO_REGULATION_OF_CELL_DIVISION	GO_REGULATION_OF_CELL_DIVISION		37	0.304314	2.15556	0	0.0095486	0.647	438	tags=49%, list=19%, signal=59%
GO_ION_TRANSPORT	GO_ION_TRANSPORT		175	0.139851	2.15381	0	0.00963097	0.653	1493	tags=77%, list=64%, signal=195%
GO_REGULATION_OF_SECRETION	GO_REGULATION_OF_SECRETION		116	0.17898	2.15288	0	0.0096512	0.657	1401	tags=77%, list=60%, signal=181%
GO_REGULATION_OF_HOMEOSTATIC_PROCESS	GO_REGULATION_OF_HOMEOSTATIC_PROCESS		74	0.213067	2.15146	0.00404858	0.00971359	0.66	1450	tags=82%, list=62%, signal=209%
GO_REGULATION_OF_CELL_DEATH	GO_REGULATION_OF_CELL_DEATH		238	0.124366	2.1479	0.00205761	0.00985444	0.669	1394	tags=71%, list=59%, signal=156%
GO_REGULATION_OF_RESPONSE_TO_STRESS	GO_REGULATION_OF_RESPONSE_TO_STRESS		224	0.130162	2.1475	0.0019802	0.00981187	0.669	1211	tags=63%, list=52%, signal=118%
GO_REGULATION_OF_B_CELL_ACTIVATION	GO_REGULATION_OF_B_CELL_ACTIVATION		29	0.338597	2.14506	0	0.00996824	0.679	1076	tags=79%, list=46%, signal=145%
GO_POSITIVE_REGULATION_OF_B_CELL_ACTIVATION	GO_POSITIVE_REGULATION_OF_B_CELL_ACTIVATION		17	0.415121	2.13985	0.00198807	0.0102079	0.691	965	tags=82%, list=41%, signal=139%
GO_POSITIVE_REGULATION_OF_ESTABLISHMENT_OF_PROTEIN_LOCALIZATION	GO_POSITIVE_REGULATION_OF_ESTABLISHMENT_OF_PROTEIN_LOCALIZATION		77	0.210097	2.13768	0.00598802	0.0102827	0.696	1260	tags=74%, list=54%, signal=155%
GO_NEGATIVE_REGULATION_OF_ORGANELLE_ORGANIZATION	GO_NEGATIVE_REGULATION_OF_ORGANELLE_ORGANIZATION		53	0.252789	2.13103	0.00408998	0.0107577	0.712	615	tags=51%, list=26%, signal=67%
GO_MULTICELLULAR_ORGANISMAL_MACROMOLECULE_METABOLIC_PROCESS	GO_MULTICELLULAR_ORGANISMAL_MACROMOLECULE_METABOLIC_PROCESS		26	0.349467	2.12739	0.00193798	0.0109875	0.723	1084	tags=81%, list=46%, signal=148%
GO_NEGATIVE_REGULATION_OF_RESPONSE_TO_WOUNDING	GO_NEGATIVE_REGULATION_OF_RESPONSE_TO_WOUNDING		41	0.277353	2.12688	0	0.0109904	0.726	1249	tags=80%, list=53%, signal=169%
GO_POSITIVE_REGULATION_OF_CELL_DIFFERENTIATION	GO_POSITIVE_REGULATION_OF_CELL_DIFFERENTIATION		137	0.160363	2.12528	0.00413223	0.0109929	0.729	1444	tags=77%, list=61%, signal=187%
GO_REGULATION_OF_HYDROLASE_ACTIVITY	GO_REGULATION_OF_HYDROLASE_ACTIVITY		205	0.133735	2.12509	0.00404858	0.0109459	0.73	1419	tags=73%, list=60%, signal=168%
GO_REGULATION_OF_CYTOKINE_PRODUCTION_INVOLVED_IN_IMMUNE_RESPONSE	GO_REGULATION_OF_CYTOKINE_PRODUCTION_INVOLVED_IN_IMMUNE_RESPONSE		15	0.444035	2.11875	0.00394477	0.0113432	0.745	998	tags=87%, list=43%, signal=150%
GO_POSITIVE_REGULATION_OF_PROTEIN_METABOLIC_PROCESS	GO_POSITIVE_REGULATION_OF_PROTEIN_METABOLIC_PROCESS		231	0.126817	2.11774	0	0.0113431	0.747	1428	tags=72%, list=61%, signal=166%
GO_POSITIVE_REGULATION_OF_SEQUENCE_SPECIFIC_DNA_BINDING_TRANSCRIPTION_FACTOR_ACTIVITY	GO_POSITIVE_REGULATION_OF_SEQUENCE_SPECIFIC_DNA_BINDING_TRANSCRIPTION_FACTOR_ACTIVITY		41	0.285991	2.1174	0.00198807	0.0113023	0.747	1000	tags=71%, list=43%, signal=121%
GO_CYTOSKELETON_ORGANIZATION	GO_CYTOSKELETON_ORGANIZATION		140	0.155875	2.11047	0.00212314	0.0116502	0.764	1550	tags=81%, list=66%, signal=223%
GO_CELLULAR_HOMEOSTASIS	GO_CELLULAR_HOMEOSTASIS		111	0.177619	2.10459	0.00373134	0.0120246	0.782	1167	tags=67%, list=50%, signal=126%
GO_REGULATION_OF_PHAGOCYTOSIS	GO_REGULATION_OF_PHAGOCYTOSIS		25	0.348463	2.10441	0.00598802	0.0119818	0.782	974	tags=76%, list=41%, signal=128%
GO_POSITIVE_REGULATION_OF_CHEMOTAXIS	GO_POSITIVE_REGULATION_OF_CHEMOTAXIS		35	0.300105	2.10426	0.00208768	0.0119317	0.782	982	tags=71%, list=42%, signal=121%
GO_REGULATION_OF_CALCIUM_ION_TRANSPORT	GO_REGULATION_OF_CALCIUM_ION_TRANSPORT		37	0.297543	2.103	0	0.0119619	0.784	1469	tags=92%, list=63%, signal=242%
GO_MULTICELLULAR_ORGANISM_METABOLIC_PROCESS	GO_MULTICELLULAR_ORGANISM_METABOLIC_PROCESS		32	0.323564	2.10062	0.00396825	0.012161	0.789	1084	tags=78%, list=46%, signal=143%
GO_REGULATION_OF_GTPASE_ACTIVITY	GO_REGULATION_OF_GTPASE_ACTIVITY		109	0.181093	2.10039	0.00414079	0.0120941	0.789	1403	tags=77%, list=60%, signal=183%
GO_POSITIVE_REGULATION_OF_TRANSFERASE_ACTIVITY	GO_POSITIVE_REGULATION_OF_TRANSFERASE_ACTIVITY		100	0.182082	2.09368	0.003861	0.0126923	0.809	975	tags=59%, list=42%, signal=97%
GO_POSITIVE_REGULATION_OF_CYTOKINE_SECRETION	GO_POSITIVE_REGULATION_OF_CYTOKINE_SECRETION		28	0.340887	2.0901	0.00647948	0.0129659	0.821	1053	tags=79%, list=45%, signal=141%
GO_NEGATIVE_REGULATION_OF_CELL_ADHESION	GO_NEGATIVE_REGULATION_OF_CELL_ADHESION		47	0.256235	2.08493	0.00210084	0.013358	0.836	1058	tags=70%, list=45%, signal=125%
GO_POSITIVE_REGULATION_OF_NF_KAPPAB_TRANSCRIPTION_FACTOR_ACTIVITY	GO_POSITIVE_REGULATION_OF_NF_KAPPAB_TRANSCRIPTION_FACTOR_ACTIVITY		33	0.305243	2.08318	0.00213675	0.0134633	0.838	1000	tags=73%, list=43%, signal=125%
GO_ANTIGEN_PROCESSING_AND_PRESENTATION	GO_ANTIGEN_PROCESSING_AND_PRESENTATION		33	0.305936	2.07576	0.00200401	0.01396	0.849	1283	tags=85%, list=55%, signal=184%
GO_NEGATIVE_REGULATION_OF_IMMUNE_RESPONSE	GO_NEGATIVE_REGULATION_OF_IMMUNE_RESPONSE		28	0.330973	2.0754	0.00583658	0.0139008	0.85	1076	tags=79%, list=46%, signal=143%
GO_REGULATION_OF_LEUKOCYTE_CHEMOTAXIS	GO_REGULATION_OF_LEUKOCYTE_CHEMOTAXIS		30	0.318752	2.07433	0.00604839	0.0139184	0.854	982	tags=73%, list=42%, signal=124%
GO_POSITIVE_REGULATION_OF_CELL_DIVISION	GO_POSITIVE_REGULATION_OF_CELL_DIVISION		18	0.415212	2.07378	0.00205761	0.0138823	0.854	336	tags=56%, list=14%, signal=64%
GO_POSITIVE_REGULATION_OF_PROTEIN_SECRETION	GO_POSITIVE_REGULATION_OF_PROTEIN_SECRETION		44	0.260535	2.06269	0	0.0147271	0.867	1053	tags=70%, list=45%, signal=125%
GO_NEGATIVE_REGULATION_OF_CYTOKINE_PRODUCTION	GO_NEGATIVE_REGULATION_OF_CYTOKINE_PRODUCTION		48	0.251232	2.05933	0.00407332	0.0149108	0.87	1280	tags=79%, list=55%, signal=170%
GO_REGULATION_OF_RESPONSE_TO_WOUNDING	GO_REGULATION_OF_RESPONSE_TO_WOUNDING		99	0.174951	2.0537	0.00414938	0.0155001	0.878	1076	tags=63%, list=46%, signal=111%
GO_NEGATIVE_REGULATION_OF_SECRETION	GO_NEGATIVE_REGULATION_OF_SECRETION		34	0.295389	2.05112	0.00622407	0.0156636	0.881	1111	tags=76%, list=47%, signal=143%
GO_REGULATION_OF_LEUKOCYTE_DIFFERENTIATION	GO_REGULATION_OF_LEUKOCYTE_DIFFERENTIATION		48	0.246232	2.0493	0.0104167	0.0157068	0.881	998	tags=67%, list=43%, signal=114%
GO_MACROPHAGE_ACTIVATION	GO_MACROPHAGE_ACTIVATION		15	0.438234	2.04639	0.00195695	0.0159089	0.883	855	tags=80%, list=36%, signal=125%
GO_G_PROTEIN_COUPLED_RECEPTOR_SIGNALING_PATHWAY	GO_G_PROTEIN_COUPLED_RECEPTOR_SIGNALING_PATHWAY		76	0.2036	2.04265	0.0123711	0.0162395	0.896	834	tags=55%, list=36%, signal=83%
GO_DNA_PACKAGING	GO_DNA_PACKAGING		23	0.353829	2.04254	0.00406504	0.0161795	0.896	1116	tags=83%, list=48%, signal=156%
GO_POSITIVE_REGULATION_OF_CELL_CYCLE_PROCESS	GO_POSITIVE_REGULATION_OF_CELL_CYCLE_PROCESS		36	0.287438	2.04165	0.00581395	0.0162055	0.899	965	tags=69%, list=41%, signal=116%
GO_CELL_MATRIX_ADHESION	GO_CELL_MATRIX_ADHESION		25	0.343091	2.04141	0.00591716	0.0161464	0.899	1550	tags=100%, list=66%, signal=291%
GO_POSITIVE_REGULATION_OF_CELL_PROLIFERATION	GO_POSITIVE_REGULATION_OF_CELL_PROLIFERATION		139	0.14636	2.03716	0.00623701	0.0165871	0.906	723	tags=45%, list=31%, signal=61%
GO_POSITIVE_REGULATION_OF_LOCOMOTION	GO_POSITIVE_REGULATION_OF_LOCOMOTION		96	0.178675	2.03649	0	0.0165891	0.906	1431	tags=78%, list=61%, signal=192%
GO_NEGATIVE_REGULATION_OF_CYTOSKELETON_ORGANIZATION	GO_NEGATIVE_REGULATION_OF_CYTOSKELETON_ORGANIZATION		39	0.280774	2.03436	0.0020202	0.0166753	0.91	615	tags=54%, list=26%, signal=72%
GO_REGULATION_OF_CHEMOTAXIS	GO_REGULATION_OF_CHEMOTAXIS		48	0.253188	2.02165	0	0.0179867	0.922	982	tags=67%, list=42%, signal=112%
GO_CELL_PROLIFERATION	GO_CELL_PROLIFERATION		105	0.171955	2.02019	0.00195312	0.0180254	0.924	1201	tags=68%, list=51%, signal=132%
GO_POSITIVE_REGULATION_OF_INTERFERON_GAMMA_PRODUCTION	GO_POSITIVE_REGULATION_OF_INTERFERON_GAMMA_PRODUCTION		17	0.410831	2.01978	0.00613497	0.0179925	0.924	975	tags=82%, list=42%, signal=140%
GO_REGULATION_OF_ION_TRANSPORT	GO_REGULATION_OF_ION_TRANSPORT		96	0.17997	2.01487	0	0.0184151	0.929	1477	tags=80%, list=63%, signal=207%
GO_CELL_CYCLE_G2_M_PHASE_TRANSITION	GO_CELL_CYCLE_G2_M_PHASE_TRANSITION		23	0.353492	2.01445	0.0020202	0.0183402	0.929	198	tags=43%, list=8%, signal=47%
GO_POSITIVE_REGULATION_OF_LEUKOCYTE_DIFFERENTIATION	GO_POSITIVE_REGULATION_OF_LEUKOCYTE_DIFFERENTIATION		32	0.30122	2.00219	0.003861	0.0195735	0.941	989	tags=72%, list=42%, signal=122%
GO_PLATELET_ACTIVATION	GO_PLATELET_ACTIVATION		35	0.27918	1.99663	0.00379507	0.020249	0.95	1500	tags=91%, list=64%, signal=249%
GO_CELL_PROJECTION_ORGANIZATION	GO_CELL_PROJECTION_ORGANIZATION		111	0.166302	1.99078	0.00982318	0.0209003	0.956	1425	tags=77%, list=61%, signal=186%
GO_REGULATED_EXOCYTOSIS	GO_REGULATED_EXOCYTOSIS		41	0.263334	1.98859	0.00193424	0.0211567	0.959	995	tags=68%, list=42%, signal=116%
GO_REGULATION_OF_INTERFERON_GAMMA_PRODUCTION	GO_REGULATION_OF_INTERFERON_GAMMA_PRODUCTION		24	0.33778	1.98367	0.00386847	0.0216928	0.967	975	tags=75%, list=42%, signal=127%
GO_VASCULATURE_DEVELOPMENT	GO_VASCULATURE_DEVELOPMENT		88	0.182019	1.98366	0.0119522	0.0216048	0.968	1402	tags=77%, list=60%, signal=185%
GO_RESPONSE_TO_LIPID	GO_RESPONSE_TO_LIPID		161	0.138875	1.97249	0.00617284	0.0230285	0.978	1212	tags=65%, list=52%, signal=124%
GO_B_CELL_ACTIVATION	GO_B_CELL_ACTIVATION		27	0.323663	1.97184	0.00769231	0.0230477	0.98	1074	tags=78%, list=46%, signal=142%
GO_POSITIVE_REGULATION_OF_MITOTIC_CELL_CYCLE	GO_POSITIVE_REGULATION_OF_MITOTIC_CELL_CYCLE		22	0.353514	1.96153	0.008	0.0243314	0.984	1418	tags=95%, list=60%, signal=239%
GO_CATION_TRANSPORT	GO_CATION_TRANSPORT		106	0.16355	1.95217	0.00614754	0.0257061	0.988	1493	tags=79%, list=64%, signal=208%
GO_REGULATION_OF_PROTEIN_MODIFICATION_PROCESS	GO_REGULATION_OF_PROTEIN_MODIFICATION_PROCESS		263	0.108552	1.95034	0.00792079	0.0258491	0.988	844	tags=46%, list=36%, signal=63%
GO_ACTIVATION_OF_INNATE_IMMUNE_RESPONSE	GO_ACTIVATION_OF_INNATE_IMMUNE_RESPONSE		53	0.22852	1.95011	0.010101	0.0257575	0.988	715	tags=53%, list=30%, signal=74%
GO_REGULATION_OF_CELLULAR_COMPONENT_BIOGENESIS	GO_REGULATION_OF_CELLULAR_COMPONENT_BIOGENESIS		116	0.155574	1.94771	0.0121212	0.0259445	0.989	1433	tags=76%, list=61%, signal=185%
GO_RESPONSE_TO_ENDOGENOUS_STIMULUS	GO_RESPONSE_TO_ENDOGENOUS_STIMULUS		237	0.114907	1.93903	0.00191205	0.0271649	0.992	1510	tags=75%, list=64%, signal=188%
GO_PROTEIN_COMPLEX_BIOGENESIS	GO_PROTEIN_COMPLEX_BIOGENESIS		144	0.137843	1.93381	0.0117417	0.0278322	0.995	1766	tags=88%, list=75%, signal=334%
GO_INTEGRIN_MEDIATED_SIGNALING_PATHWAY	GO_INTEGRIN_MEDIATED_SIGNALING_PATHWAY		27	0.310227	1.92441	0.0174419	0.0289787	0.995	1540	tags=96%, list=66%, signal=277%
GO_ESTABLISHMENT_OF_LOCALIZATION_IN_CELL	GO_ESTABLISHMENT_OF_LOCALIZATION_IN_CELL		171	0.129834	1.92278	0.00613497	0.029079	0.995	1776	tags=88%, list=76%, signal=334%
GO_SECRETION	GO_SECRETION		93	0.171886	1.91827	0.0115607	0.0295042	0.995	1000	tags=59%, list=43%, signal=99%
GO_REGULATION_OF_BODY_FLUID_LEVELS	GO_REGULATION_OF_BODY_FLUID_LEVELS		100	0.169235	1.91783	0.00199601	0.0294693	0.995	1450	tags=78%, list=62%, signal=195%
GO_REGULATION_OF_TISSUE_REMODELING	GO_REGULATION_OF_TISSUE_REMODELING		15	0.410602	1.91766	0.00782779	0.0293588	0.995	1076	tags=87%, list=46%, signal=159%
GO_REGULATION_OF_TRANSMEMBRANE_TRANSPORT	GO_REGULATION_OF_TRANSMEMBRANE_TRANSPORT		63	0.208329	1.91692	0.00641026	0.0293057	0.995	1461	tags=83%, list=62%, signal=213%
GO_POSITIVE_REGULATION_OF_INNATE_IMMUNE_RESPONSE	GO_POSITIVE_REGULATION_OF_INNATE_IMMUNE_RESPONSE		56	0.223292	1.91558	0.011976	0.0294197	0.995	787	tags=55%, list=34%, signal=81%
GO_POSITIVE_REGULATION_OF_PROTEIN_MODIFICATION_PROCESS	GO_POSITIVE_REGULATION_OF_PROTEIN_MODIFICATION_PROCESS		177	0.129126	1.91089	0.0156556	0.03	0.995	1284	tags=67%, list=55%, signal=136%
GO_NEGATIVE_REGULATION_OF_DEFENSE_RESPONSE	GO_NEGATIVE_REGULATION_OF_DEFENSE_RESPONSE		32	0.284003	1.90997	0.00798403	0.0300227	0.995	1249	tags=81%, list=53%, signal=171%
GO_MICROTUBULE_BASED_MOVEMENT	GO_MICROTUBULE_BASED_MOVEMENT		16	0.394297	1.90684	0.0165289	0.030522	0.996	547	tags=63%, list=23%, signal=81%
GO_NEGATIVE_REGULATION_OF_DEVELOPMENTAL_PROCESS	GO_NEGATIVE_REGULATION_OF_DEVELOPMENTAL_PROCESS		120	0.150748	1.89858	0.0121457	0.031756	0.997	1385	tags=73%, list=59%, signal=170%
GO_DEFENSE_RESPONSE_TO_VIRUS	GO_DEFENSE_RESPONSE_TO_VIRUS		29	0.296338	1.89678	0.0101626	0.0319356	0.997	1174	tags=79%, list=50%, signal=157%
GO_REGULATION_OF_CELL_MORPHOGENESIS	GO_REGULATION_OF_CELL_MORPHOGENESIS		87	0.176567	1.89388	0.0180361	0.032229	0.997	1435	tags=78%, list=61%, signal=194%
GO_CIRCULATORY_SYSTEM_DEVELOPMENT	GO_CIRCULATORY_SYSTEM_DEVELOPMENT		126	0.149272	1.89182	0.00790514	0.03249	0.998	1419	tags=75%, list=60%, signal=178%
GO_RESPONSE_TO_ALKALOID	GO_RESPONSE_TO_ALKALOID		15	0.397971	1.89108	0.0141988	0.0324499	0.998	1262	tags=93%, list=54%, signal=201%
GO_POSITIVE_REGULATION_OF_CELL_COMMUNICATION	GO_POSITIVE_REGULATION_OF_CELL_COMMUNICATION		234	0.110424	1.88923	0.00803213	0.0326076	0.998	1361	tags=68%, list=58%, signal=146%
GO_REGULATION_OF_SYSTEM_PROCESS	GO_REGULATION_OF_SYSTEM_PROCESS		76	0.187593	1.87734	0.00595238	0.034647	0.998	1272	tags=72%, list=54%, signal=153%
GO_MUCOPOLYSACCHARIDE_METABOLIC_PROCESS	GO_MUCOPOLYSACCHARIDE_METABOLIC_PROCESS		17	0.369319	1.87145	0.0059761	0.0357305	0.998	1348	tags=94%, list=57%, signal=219%
GO_DIVALENT_INORGANIC_CATION_TRANSPORT	GO_DIVALENT_INORGANIC_CATION_TRANSPORT		39	0.249881	1.86781	0.0127119	0.0363866	0.998	1469	tags=87%, list=63%, signal=229%
GO_REGULATION_OF_EXTRINSIC_APOPTOTIC_SIGNALING_PATHWAY	GO_REGULATION_OF_EXTRINSIC_APOPTOTIC_SIGNALING_PATHWAY		30	0.28746	1.86644	0.0100402	0.036518	0.998	898	tags=67%, list=38%, signal=107%
GO_RESPONSE_TO_OXYGEN_CONTAINING_COMPOUND	GO_RESPONSE_TO_OXYGEN_CONTAINING_COMPOUND		253	0.106765	1.86352	0.00793651	0.0369748	0.998	1418	tags=70%, list=60%, signal=158%
GO_CELLULAR_RESPONSE_TO_CYTOKINE_STIMULUS	GO_CELLULAR_RESPONSE_TO_CYTOKINE_STIMULUS		115	0.155159	1.8626	0.0133588	0.0369632	0.998	1143	tags=63%, list=49%, signal=118%
GO_REGULATION_OF_CALCIUM_ION_IMPORT	GO_REGULATION_OF_CALCIUM_ION_IMPORT		21	0.337426	1.86197	0.00589391	0.0369236	0.998	1450	tags=95%, list=62%, signal=247%
GO_FC_GAMMA_RECEPTOR_SIGNALING_PATHWAY	GO_FC_GAMMA_RECEPTOR_SIGNALING_PATHWAY		18	0.370815	1.85857	0.00607288	0.0374577	0.998	1483	tags=100%, list=63%, signal=269%
GO_NEGATIVE_REGULATION_OF_LOCOMOTION	GO_NEGATIVE_REGULATION_OF_LOCOMOTION		58	0.205541	1.85716	0.0101626	0.0376391	0.998	1431	tags=81%, list=61%, signal=202%
GO_CELLULAR_RESPONSE_TO_MECHANICAL_STIMULUS	GO_CELLULAR_RESPONSE_TO_MECHANICAL_STIMULUS		17	0.378656	1.85698	0.0159681	0.0375578	0.998	1050	tags=82%, list=45%, signal=148%
GO_DNA_CONFORMATION_CHANGE	GO_DNA_CONFORMATION_CHANGE		30	0.294708	1.85686	0.0184426	0.0374478	0.998	1116	tags=77%, list=48%, signal=144%
GO_NEGATIVE_REGULATION_OF_CELL_DEATH	GO_NEGATIVE_REGULATION_OF_CELL_DEATH		131	0.146577	1.8522	0.0172414	0.0382964	0.998	857	tags=50%, list=36%, signal=75%
GO_REGULATION_OF_INFLAMMATORY_RESPONSE	GO_REGULATION_OF_INFLAMMATORY_RESPONSE		70	0.187596	1.85139	0.0159363	0.0382894	0.998	1014	tags=61%, list=43%, signal=105%
GO_REGULATION_OF_PROTEIN_POLYMERIZATION	GO_REGULATION_OF_PROTEIN_POLYMERIZATION		34	0.263054	1.84054	0.0113208	0.0403542	0.999	1393	tags=85%, list=59%, signal=207%
GO_REGULATION_OF_ADAPTIVE_IMMUNE_RESPONSE	GO_REGULATION_OF_ADAPTIVE_IMMUNE_RESPONSE		25	0.304554	1.8373	0.0124481	0.0409737	0.999	1076	tags=76%, list=46%, signal=139%
GO_REGULATION_OF_FIBROBLAST_PROLIFERATION	GO_REGULATION_OF_FIBROBLAST_PROLIFERATION		20	0.341581	1.82453	0.0161943	0.0437185	1	1317	tags=90%, list=56%, signal=203%
GO_REGULATION_OF_RESPONSE_TO_CYTOKINE_STIMULUS	GO_REGULATION_OF_RESPONSE_TO_CYTOKINE_STIMULUS		30	0.276992	1.82	0.00387597	0.0445968	1	844	tags=63%, list=36%, signal=98%
GO_NEGATIVE_REGULATION_OF_APOPTOTIC_SIGNALING_PATHWAY	GO_NEGATIVE_REGULATION_OF_APOPTOTIC_SIGNALING_PATHWAY		34	0.267909	1.81689	0.0217822	0.0449848	1	484	tags=47%, list=21%, signal=58%
GO_REGULATION_OF_INTRACELLULAR_TRANSPORT	GO_REGULATION_OF_INTRACELLULAR_TRANSPORT		80	0.175507	1.81606	0.0157791	0.0449595	1	1450	tags=79%, list=62%, signal=199%
GO_CELL_CYCLE_PHASE_TRANSITION	GO_CELL_CYCLE_PHASE_TRANSITION		45	0.230781	1.81276	0.0200803	0.0456615	1	198	tags=31%, list=8%, signal=33%
GO_EXOCYTOSIS	GO_EXOCYTOSIS		52	0.21519	1.80862	0.0296443	0.0464965	1	995	tags=63%, list=42%, signal=108%
GO_SECOND_MESSENGER_MEDIATED_SIGNALING	GO_SECOND_MESSENGER_MEDIATED_SIGNALING		26	0.295336	1.80715	0.0196464	0.046639	1	1300	tags=85%, list=55%, signal=187%
GO_POSITIVE_REGULATION_OF_INTRACELLULAR_SIGNAL_TRANSDUCTION	GO_POSITIVE_REGULATION_OF_INTRACELLULAR_SIGNAL_TRANSDUCTION		155	0.127926	1.79767	0.0178926	0.0488942	1	1203	tags=63%, list=51%, signal=121%
GO_POSITIVE_REGULATION_OF_SECRETION	GO_POSITIVE_REGULATION_OF_SECRETION		68	0.185862	1.79607	0.0222222	0.0491231	1	1060	tags=63%, list=45%, signal=112%
GO_T_CELL_DIFFERENTIATION	GO_T_CELL_DIFFERENTIATION		27	0.29569	1.79497	0.0167715	0.0492464	1	965	tags=70%, list=41%, signal=118%
GO_ACTIN_FILAMENT_BASED_PROCESS	GO_ACTIN_FILAMENT_BASED_PROCESS		91	0.158778	1.79354	0.0151515	0.0493979	1	1550	tags=81%, list=66%, signal=230%
GO_SECRETION_BY_CELL	GO_SECRETION_BY_CELL		79	0.174487	1.79349	0.0104384	0.0492122	1	1000	tags=59%, list=43%, signal=100%
GO_REPRODUCTION	GO_REPRODUCTION		132	0.13847	1.78421	0.0118343	0.0514779	1	1382	tags=72%, list=59%, signal=165%
GO_REGULATION_OF_ACTIN_FILAMENT_LENGTH	GO_REGULATION_OF_ACTIN_FILAMENT_LENGTH		30	0.276503	1.78319	0.0143149	0.0515801	1	1393	tags=87%, list=59%, signal=210%
GO_NEGATIVE_REGULATION_OF_CYSTEINE_TYPE_ENDOPEPTIDASE_ACTIVITY	GO_NEGATIVE_REGULATION_OF_CYSTEINE_TYPE_ENDOPEPTIDASE_ACTIVITY		16	0.365888	1.77955	0.0217391	0.0524218	1	760	tags=69%, list=32%, signal=101%
GO_RESPONSE_TO_HEAT	GO_RESPONSE_TO_HEAT		21	0.320544	1.77908	0.0313808	0.0523859	1	483	tags=52%, list=21%, signal=65%
GO_REGULATION_OF_MAPK_CASCADE	GO_REGULATION_OF_MAPK_CASCADE		128	0.135121	1.77735	0.0168776	0.052722	1	818	tags=48%, list=35%, signal=69%
GO_METAL_ION_TRANSPORT	GO_METAL_ION_TRANSPORT		79	0.173405	1.77526	0.0178571	0.0531653	1	1478	tags=80%, list=63%, signal=208%
GO_PROTEIN_PHOSPHORYLATION	GO_PROTEIN_PHOSPHORYLATION		142	0.130355	1.77373	0.0178571	0.0533876	1	1150	tags=61%, list=49%, signal=113%
GO_MEMBRANE_ORGANIZATION	GO_MEMBRANE_ORGANIZATION		101	0.150899	1.77268	0.0238095	0.0535409	1	1357	tags=72%, list=58%, signal=164%
GO_REGULATION_OF_RECEPTOR_ACTIVITY	GO_REGULATION_OF_RECEPTOR_ACTIVITY		20	0.333591	1.77235	0.0166667	0.0534296	1	1453	tags=95%, list=62%, signal=247%
GO_REGULATION_OF_LYMPHOCYTE_MEDIATED_IMMUNITY	GO_REGULATION_OF_LYMPHOCYTE_MEDIATED_IMMUNITY		20	0.337199	1.76818	0.0252101	0.0545118	1	975	tags=75%, list=42%, signal=127%
GO_REGULATION_OF_CELL_DEVELOPMENT	GO_REGULATION_OF_CELL_DEVELOPMENT		109	0.147559	1.76803	0.010142	0.054346	1	1435	tags=75%, list=61%, signal=184%
GO_REGULATION_OF_TRANSFERASE_ACTIVITY	GO_REGULATION_OF_TRANSFERASE_ACTIVITY		143	0.13059	1.7635	0.0212766	0.0555084	1	844	tags=48%, list=36%, signal=71%
GO_CELL_CELL_SIGNALING	GO_CELL_CELL_SIGNALING		74	0.179669	1.76327	0.0168421	0.0553452	1	1050	tags=62%, list=45%, signal=109%
GO_REGULATION_OF_CELL_CYCLE_PROCESS	GO_REGULATION_OF_CELL_CYCLE_PROCESS		70	0.179268	1.7594	0.0143737	0.05637	1	664	tags=46%, list=28%, signal=62%
GO_G_PROTEIN_COUPLED_RECEPTOR_SIGNALING_PATHWAY_COUPLED_TO_CYCLIC_NUCLEOTIDE_SECOND_MESSENGER	GO_G_PROTEIN_COUPLED_RECEPTOR_SIGNALING_PATHWAY_COUPLED_TO_CYCLIC_NUCLEOTIDE_SECOND_MESSENGER		19	0.343427	1.75918	0.0224949	0.0562045	1	1300	tags=89%, list=55%, signal=199%
GO_REGULATION_OF_MUSCLE_SYSTEM_PROCESS	GO_REGULATION_OF_MUSCLE_SYSTEM_PROCESS		31	0.264692	1.75683	0.020284	0.0567176	1	1355	tags=84%, list=58%, signal=196%
GO_MULTI_MULTICELLULAR_ORGANISM_PROCESS	GO_MULTI_MULTICELLULAR_ORGANISM_PROCESS		26	0.2904	1.75596	0.0286299	0.0567917	1	589	tags=54%, list=25%, signal=71%
GO_EXTRACELLULAR_MATRIX_DISASSEMBLY	GO_EXTRACELLULAR_MATRIX_DISASSEMBLY		25	0.295687	1.75363	0.0178218	0.057207	1	627	tags=56%, list=27%, signal=76%
GO_POSITIVE_REGULATION_OF_CYTOKINE_BIOSYNTHETIC_PROCESS	GO_POSITIVE_REGULATION_OF_CYTOKINE_BIOSYNTHETIC_PROCESS		18	0.346161	1.75358	0.020284	0.0570114	1	1410	tags=94%, list=60%, signal=235%
GO_PHOSPHATE_CONTAINING_COMPOUND_METABOLIC_PROCESS	GO_PHOSPHATE_CONTAINING_COMPOUND_METABOLIC_PROCESS		294	0.0947678	1.75167	0.0175781	0.0573099	1	1769	tags=84%, list=75%, signal=297%
GO_POSITIVE_REGULATION_OF_HEMOPOIESIS	GO_POSITIVE_REGULATION_OF_HEMOPOIESIS		36	0.248847	1.75076	0.0196078	0.0573992	1	989	tags=67%, list=42%, signal=113%
GO_CELL_DEATH	GO_CELL_DEATH		172	0.117209	1.74457	0.0157791	0.0589345	1	1464	tags=73%, list=62%, signal=180%
GO_MODULATION_OF_SYNAPTIC_TRANSMISSION	GO_MODULATION_OF_SYNAPTIC_TRANSMISSION		29	0.272174	1.73681	0.0157791	0.0612417	1	1311	tags=83%, list=56%, signal=185%
GO_REGULATION_OF_LYMPHOCYTE_DIFFERENTIATION	GO_REGULATION_OF_LYMPHOCYTE_DIFFERENTIATION		32	0.265652	1.73634	0.0344828	0.0612078	1	998	tags=69%, list=43%, signal=118%
GO_POSITIVE_REGULATION_OF_MAPK_CASCADE	GO_POSITIVE_REGULATION_OF_MAPK_CASCADE		93	0.152941	1.7314	0.0236686	0.0626492	1	765	tags=47%, list=33%, signal=67%
GO_NEGATIVE_REGULATION_OF_PEPTIDASE_ACTIVITY	GO_NEGATIVE_REGULATION_OF_PEPTIDASE_ACTIVITY		40	0.229809	1.73027	0.0251451	0.0628312	1	760	tags=55%, list=32%, signal=80%
GO_CALCIUM_ION_TRANSPORT	GO_CALCIUM_ION_TRANSPORT		33	0.256326	1.72849	0.0179641	0.0632017	1	1469	tags=88%, list=63%, signal=231%
GO_SKELETAL_SYSTEM_DEVELOPMENT	GO_SKELETAL_SYSTEM_DEVELOPMENT		65	0.188706	1.72808	0.0266667	0.0631266	1	688	tags=48%, list=29%, signal=66%
GO_CALCIUM_ION_TRANSMEMBRANE_TRANSPORT	GO_CALCIUM_ION_TRANSMEMBRANE_TRANSPORT		17	0.346859	1.72529	0.0301811	0.0638828	1	986	tags=76%, list=42%, signal=131%
GO_RAS_PROTEIN_SIGNAL_TRANSDUCTION	GO_RAS_PROTEIN_SIGNAL_TRANSDUCTION		28	0.275616	1.71489	0.0205607	0.0670256	1	1456	tags=89%, list=62%, signal=232%
GO_CIRCULATORY_SYSTEM_PROCESS	GO_CIRCULATORY_SYSTEM_PROCESS		69	0.177455	1.71431	0.0244898	0.0669961	1	1262	tags=71%, list=54%, signal=149%
GO_REGULATION_OF_BLOOD_PRESSURE	GO_REGULATION_OF_BLOOD_PRESSURE		35	0.247434	1.71015	0.0308008	0.0681644	1	1238	tags=77%, list=53%, signal=161%
GO_ENDOTHELIUM_DEVELOPMENT	GO_ENDOTHELIUM_DEVELOPMENT		23	0.295409	1.70286	0.023622	0.0704464	1	1456	tags=91%, list=62%, signal=238%
GO_REGULATION_OF_REGULATED_SECRETORY_PATHWAY	GO_REGULATION_OF_REGULATED_SECRETORY_PATHWAY		21	0.30628	1.69944	0.0334646	0.0714371	1	628	tags=57%, list=27%, signal=77%
GO_REGULATION_OF_TRANSPORTER_ACTIVITY	GO_REGULATION_OF_TRANSPORTER_ACTIVITY		31	0.255085	1.69791	0.0250482	0.071773	1	1453	tags=87%, list=62%, signal=225%
GO_REGULATION_OF_CELL_SIZE	GO_REGULATION_OF_CELL_SIZE		28	0.272291	1.69592	0.0264766	0.072194	1	1296	tags=82%, list=55%, signal=181%
GO_REGULATION_OF_VESICLE_MEDIATED_TRANSPORT	GO_REGULATION_OF_VESICLE_MEDIATED_TRANSPORT		82	0.1631	1.69371	0.0320641	0.0728989	1	1462	tags=78%, list=62%, signal=200%
GO_RESPONSE_TO_VIRUS	GO_RESPONSE_TO_VIRUS		40	0.228466	1.69009	0.0293542	0.0740896	1	1174	tags=73%, list=50%, signal=143%
GO_REGULATION_OF_SEQUESTERING_OF_CALCIUM_ION	GO_REGULATION_OF_SEQUESTERING_OF_CALCIUM_ION		18	0.328994	1.68879	0.0345528	0.0743682	1	1450	tags=94%, list=62%, signal=245%
GO_CELLULAR_COMPONENT_MORPHOGENESIS	GO_CELLULAR_COMPONENT_MORPHOGENESIS		118	0.13684	1.6761	0.0401606	0.0788975	1	1425	tags=74%, list=61%, signal=178%
GO_REGULATION_OF_CYTOKINE_BIOSYNTHETIC_PROCESS	GO_REGULATION_OF_CYTOKINE_BIOSYNTHETIC_PROCESS		25	0.278864	1.67457	0.031068	0.0792697	1	760	tags=60%, list=32%, signal=88%
GO_REGULATION_OF_ENDOCYTOSIS	GO_REGULATION_OF_ENDOCYTOSIS		50	0.201201	1.67453	0.026694	0.0790262	1	1462	tags=82%, list=62%, signal=213%
GO_REGULATION_OF_CHEMOKINE_PRODUCTION	GO_REGULATION_OF_CHEMOKINE_PRODUCTION		20	0.316839	1.67333	0.0294737	0.079238	1	905	tags=70%, list=39%, signal=113%
GO_REGULATION_OF_PROTEIN_COMPLEX_ASSEMBLY	GO_REGULATION_OF_PROTEIN_COMPLEX_ASSEMBLY		63	0.179931	1.66924	0.0265306	0.080577	1	1265	tags=71%, list=54%, signal=151%
GO_LYMPHOCYTE_ACTIVATION_INVOLVED_IN_IMMUNE_RESPONSE	GO_LYMPHOCYTE_ACTIVATION_INVOLVED_IN_IMMUNE_RESPONSE		20	0.31366	1.66819	0.0257937	0.0807902	1	795	tags=65%, list=34%, signal=97%
GO_PEPTIDYL_SERINE_MODIFICATION	GO_PEPTIDYL_SERINE_MODIFICATION		28	0.266626	1.66744	0.0426357	0.0808262	1	1393	tags=86%, list=59%, signal=208%
GO_REGULATION_OF_CHROMOSOME_ORGANIZATION	GO_REGULATION_OF_CHROMOSOME_ORGANIZATION		28	0.263362	1.66712	0.0366089	0.0807184	1	562	tags=50%, list=24%, signal=65%
GO_NEGATIVE_REGULATION_OF_EXTRINSIC_APOPTOTIC_SIGNALING_PATHWAY	GO_NEGATIVE_REGULATION_OF_EXTRINSIC_APOPTOTIC_SIGNALING_PATHWAY		24	0.296472	1.66481	0.0410959	0.08129	1	484	tags=50%, list=21%, signal=62%
GO_REGULATION_OF_NEURON_PROJECTION_DEVELOPMENT	GO_REGULATION_OF_NEURON_PROJECTION_DEVELOPMENT		65	0.177957	1.65937	0.0306122	0.0831439	1	1435	tags=78%, list=61%, signal=196%
GO_T_CELL_RECEPTOR_SIGNALING_PATHWAY	GO_T_CELL_RECEPTOR_SIGNALING_PATHWAY		20	0.313402	1.65614	0.0262097	0.0843266	1	913	tags=70%, list=39%, signal=114%
GO_CELLULAR_RESPONSE_TO_ENDOGENOUS_STIMULUS	GO_CELLULAR_RESPONSE_TO_ENDOGENOUS_STIMULUS		164	0.114469	1.64583	0.0257426	0.0883496	1	1510	tags=75%, list=64%, signal=195%
GO_REGULATION_OF_CELL_PROJECTION_ORGANIZATION	GO_REGULATION_OF_CELL_PROJECTION_ORGANIZATION		85	0.154454	1.6393	0.0425101	0.0909863	1	1445	tags=76%, list=62%, signal=192%
GO_CALCIUM_MEDIATED_SIGNALING	GO_CALCIUM_MEDIATED_SIGNALING		17	0.339188	1.63805	0.0436433	0.0912205	1	1142	tags=82%, list=49%, signal=159%
GO_POSITIVE_REGULATION_OF_CHEMOKINE_PRODUCTION	GO_POSITIVE_REGULATION_OF_CHEMOKINE_PRODUCTION		15	0.358737	1.63724	0.0425101	0.0912718	1	1197	tags=87%, list=51%, signal=176%
GO_NEGATIVE_REGULATION_OF_PROTEOLYSIS	GO_NEGATIVE_REGULATION_OF_PROTEOLYSIS		52	0.199544	1.63705	0.0336634	0.0910944	1	760	tags=52%, list=32%, signal=75%
GO_REGULATION_OF_CELL_SHAPE	GO_REGULATION_OF_CELL_SHAPE		30	0.242537	1.63427	0.0447154	0.0920304	1	1550	tags=90%, list=66%, signal=261%
GO_EPITHELIUM_DEVELOPMENT	GO_EPITHELIUM_DEVELOPMENT		145	0.117867	1.63293	0.0444874	0.0923152	1	1472	tags=74%, list=63%, signal=186%
GO_REGULATION_OF_NEURON_DIFFERENTIATION	GO_REGULATION_OF_NEURON_DIFFERENTIATION		77	0.159893	1.62984	0.0301811	0.0934345	1	1435	tags=77%, list=61%, signal=191%
GO_POSITIVE_REGULATION_OF_INTRACELLULAR_TRANSPORT	GO_POSITIVE_REGULATION_OF_INTRACELLULAR_TRANSPORT		47	0.200079	1.62185	0.0634921	0.0965206	1	1437	tags=81%, list=61%, signal=204%
GO_CELL_MORPHOGENESIS_INVOLVED_IN_DIFFERENTIATION	GO_CELL_MORPHOGENESIS_INVOLVED_IN_DIFFERENTIATION		75	0.161637	1.62018	0.0352941	0.097009	1	1510	tags=80%, list=64%, signal=217%
GO_REGULATION_OF_INTERLEUKIN_8_PRODUCTION	GO_REGULATION_OF_INTERLEUKIN_8_PRODUCTION		17	0.325309	1.61967	0.0581395	0.096968	1	760	tags=65%, list=32%, signal=95%
GO_NEGATIVE_REGULATION_OF_NEURON_APOPTOTIC_PROCESS	GO_NEGATIVE_REGULATION_OF_NEURON_APOPTOTIC_PROCESS		23	0.282599	1.61924	0.0438247	0.0968896	1	567	tags=52%, list=24%, signal=68%
GO_POSITIVE_REGULATION_OF_ENDOCYTOSIS	GO_POSITIVE_REGULATION_OF_ENDOCYTOSIS		34	0.237124	1.6192	0.0402299	0.0966122	1	1453	tags=85%, list=62%, signal=221%
GO_REGULATION_OF_MULTI_ORGANISM_PROCESS	GO_REGULATION_OF_MULTI_ORGANISM_PROCESS		59	0.176178	1.60576	0.0315582	0.102319	1	1108	tags=64%, list=47%, signal=119%
GO_NEGATIVE_REGULATION_OF_INFLAMMATORY_RESPONSE	GO_NEGATIVE_REGULATION_OF_INFLAMMATORY_RESPONSE		25	0.270512	1.60503	0.0291262	0.102397	1	1249	tags=80%, list=53%, signal=169%
GO_REGULATION_OF_T_CELL_DIFFERENTIATION	GO_REGULATION_OF_T_CELL_DIFFERENTIATION		23	0.272857	1.59594	0.0324544	0.106596	1	998	tags=70%, list=43%, signal=120%
GO_POSITIVE_REGULATION_OF_BLOOD_CIRCULATION	GO_POSITIVE_REGULATION_OF_BLOOD_CIRCULATION		16	0.33512	1.59494	0.0501002	0.106812	1	1272	tags=88%, list=54%, signal=190%
GO_NEGATIVE_REGULATION_OF_LEUKOCYTE_MEDIATED_IMMUNITY	GO_NEGATIVE_REGULATION_OF_LEUKOCYTE_MEDIATED_IMMUNITY		16	0.326758	1.59097	0.036965	0.1085	1	998	tags=75%, list=43%, signal=130%
GO_ADAPTIVE_IMMUNE_RESPONSE	GO_ADAPTIVE_IMMUNE_RESPONSE		55	0.182809	1.58998	0.046371	0.108776	1	1074	tags=64%, list=46%, signal=115%
GO_NEGATIVE_REGULATION_OF_HYDROLASE_ACTIVITY	GO_NEGATIVE_REGULATION_OF_HYDROLASE_ACTIVITY		58	0.180349	1.58878	0.0338645	0.109104	1	760	tags=50%, list=32%, signal=72%
GO_VASCULAR_PROCESS_IN_CIRCULATORY_SYSTEM	GO_VASCULAR_PROCESS_IN_CIRCULATORY_SYSTEM		31	0.237613	1.58078	0.0478927	0.113025	1	1342	tags=81%, list=57%, signal=186%
GO_RESPONSE_TO_NITROGEN_COMPOUND	GO_RESPONSE_TO_NITROGEN_COMPOUND		149	0.115135	1.58025	0.0502901	0.11296	1	1495	tags=74%, list=64%, signal=192%
GO_PHOSPHORYLATION	GO_PHOSPHORYLATION		178	0.101781	1.57787	0.0464217	0.113892	1	1150	tags=58%, list=49%, signal=106%
GO_POSITIVE_REGULATION_OF_CELL_CYCLE	GO_POSITIVE_REGULATION_OF_CELL_CYCLE		48	0.193804	1.57752	0.0420168	0.113737	1	287	tags=31%, list=12%, signal=35%
GO_REGULATION_OF_STRESS_ACTIVATED_PROTEIN_KINASE_SIGNALING_CASCADE	GO_REGULATION_OF_STRESS_ACTIVATED_PROTEIN_KINASE_SIGNALING_CASCADE		31	0.241093	1.57728	0.0533597	0.113529	1	728	tags=55%, list=31%, signal=78%
GO_CELL_CYCLE_CHECKPOINT	GO_CELL_CYCLE_CHECKPOINT		31	0.241608	1.5769	0.0419847	0.113326	1	1257	tags=77%, list=54%, signal=164%
GO_REGULATION_OF_NERVOUS_SYSTEM_DEVELOPMENT	GO_REGULATION_OF_NERVOUS_SYSTEM_DEVELOPMENT		98	0.13912	1.57074	0.0583333	0.116275	1	1435	tags=74%, list=61%, signal=184%
GO_CELLULAR_RESPONSE_TO_ABIOTIC_STIMULUS	GO_CELLULAR_RESPONSE_TO_ABIOTIC_STIMULUS		41	0.20875	1.56704	0.0621469	0.117908	1	1350	tags=78%, list=57%, signal=180%
GO_RECEPTOR_MEDIATED_ENDOCYTOSIS	GO_RECEPTOR_MEDIATED_ENDOCYTOSIS		39	0.21228	1.56536	0.0542169	0.118415	1	1315	tags=77%, list=56%, signal=172%
GO_POSITIVE_REGULATION_OF_PHAGOCYTOSIS	GO_POSITIVE_REGULATION_OF_PHAGOCYTOSIS		18	0.309347	1.56522	0.0451745	0.118113	1	974	tags=72%, list=41%, signal=122%
GO_ANGIOGENESIS	GO_ANGIOGENESIS		63	0.168907	1.56331	0.0521042	0.118775	1	1402	tags=76%, list=60%, signal=184%
GO_REGULATION_OF_RESPONSE_TO_BIOTIC_STIMULUS	GO_REGULATION_OF_RESPONSE_TO_BIOTIC_STIMULUS		33	0.231311	1.56161	0.0549898	0.11946	1	1100	tags=70%, list=47%, signal=129%
GO_SPHINGOLIPID_METABOLIC_PROCESS	GO_SPHINGOLIPID_METABOLIC_PROCESS		21	0.289807	1.55968	0.0374753	0.120177	1	1449	tags=90%, list=62%, signal=234%
GO_NEGATIVE_REGULATION_OF_PROTEIN_MODIFICATION_PROCESS	GO_NEGATIVE_REGULATION_OF_PROTEIN_MODIFICATION_PROCESS		100	0.13105	1.55726	0.0547945	0.121147	1	761	tags=45%, list=32%, signal=64%
GO_NEGATIVE_REGULATION_OF_TRANSPORT	GO_NEGATIVE_REGULATION_OF_TRANSPORT		70	0.160855	1.55722	0.0464646	0.120817	1	1142	tags=64%, list=49%, signal=121%
GO_CELL_JUNCTION_ORGANIZATION	GO_CELL_JUNCTION_ORGANIZATION		34	0.22505	1.55532	0.0635593	0.121541	1	1550	tags=88%, list=66%, signal=256%
GO_REGULATION_OF_APOPTOTIC_SIGNALING_PATHWAY	GO_REGULATION_OF_APOPTOTIC_SIGNALING_PATHWAY		53	0.182727	1.55085	0.045977	0.123568	1	953	tags=58%, list=41%, signal=96%
GO_REGULATION_OF_AXONOGENESIS	GO_REGULATION_OF_AXONOGENESIS		26	0.258166	1.55058	0.0759494	0.123388	1	1296	tags=81%, list=55%, signal=178%
GO_ENDOTHELIAL_CELL_DIFFERENTIATION	GO_ENDOTHELIAL_CELL_DIFFERENTIATION		16	0.319147	1.54815	0.0728347	0.124353	1	1456	tags=94%, list=62%, signal=245%
GO_NEGATIVE_REGULATION_OF_CATALYTIC_ACTIVITY	GO_NEGATIVE_REGULATION_OF_CATALYTIC_ACTIVITY		118	0.122741	1.54124	0.0529412	0.127812	1	760	tags=44%, list=32%, signal=62%
GO_BLOOD_VESSEL_MORPHOGENESIS	GO_BLOOD_VESSEL_MORPHOGENESIS		75	0.154058	1.53946	0.073922	0.128475	1	1402	tags=75%, list=60%, signal=179%
GO_POSITIVE_REGULATION_OF_KINASE_ACTIVITY	GO_POSITIVE_REGULATION_OF_KINASE_ACTIVITY		88	0.146641	1.53895	0.0516899	0.128403	1	975	tags=56%, list=42%, signal=92%
GO_CELLULAR_RESPONSE_TO_OXYGEN_CONTAINING_COMPOUND	GO_CELLULAR_RESPONSE_TO_OXYGEN_CONTAINING_COMPOUND		153	0.108494	1.53893	0.0587084	0.128069	1	1495	tags=74%, list=64%, signal=190%
GO_POSITIVE_REGULATION_OF_HOMEOSTATIC_PROCESS	GO_POSITIVE_REGULATION_OF_HOMEOSTATIC_PROCESS		33	0.223235	1.5372	0.0549242	0.128646	1	1261	tags=76%, list=54%, signal=161%
GO_REGULATION_OF_EXOCYTOSIS	GO_REGULATION_OF_EXOCYTOSIS		27	0.253547	1.5358	0.054878	0.129128	1	628	tags=52%, list=27%, signal=70%
GO_ADENYLATE_CYCLASE_MODULATING_G_PROTEIN_COUPLED_RECEPTOR_SIGNALING_PATHWAY	GO_ADENYLATE_CYCLASE_MODULATING_G_PROTEIN_COUPLED_RECEPTOR_SIGNALING_PATHWAY		16	0.323113	1.53232	0.0631164	0.130903	1	1300	tags=88%, list=55%, signal=195%
GO_ORGANELLE_LOCALIZATION	GO_ORGANELLE_LOCALIZATION		43	0.201937	1.52691	0.0667939	0.13369	1	298	tags=33%, list=13%, signal=37%
GO_MITOTIC_CELL_CYCLE_CHECKPOINT	GO_MITOTIC_CELL_CYCLE_CHECKPOINT		20	0.285825	1.52343	0.0691824	0.135615	1	1212	tags=80%, list=52%, signal=164%
GO_FC_RECEPTOR_SIGNALING_PATHWAY	GO_FC_RECEPTOR_SIGNALING_PATHWAY		29	0.234272	1.52219	0.0491803	0.136027	1	1156	tags=72%, list=49%, signal=141%
GO_TRANSMEMBRANE_RECEPTOR_PROTEIN_TYROSINE_KINASE_SIGNALING_PATHWAY	GO_TRANSMEMBRANE_RECEPTOR_PROTEIN_TYROSINE_KINASE_SIGNALING_PATHWAY		88	0.141814	1.51713	0.0618763	0.1386	1	1146	tags=63%, list=49%, signal=118%
GO_CELLULAR_RESPONSE_TO_RADIATION	GO_CELLULAR_RESPONSE_TO_RADIATION		15	0.323732	1.51392	0.0677618	0.140139	1	496	tags=53%, list=21%, signal=67%
GO_NEGATIVE_REGULATION_OF_PROTEIN_SECRETION	GO_NEGATIVE_REGULATION_OF_PROTEIN_SECRETION		22	0.270148	1.50919	0.0663984	0.142842	1	1185	tags=77%, list=50%, signal=155%
GO_REGULATION_OF_CATION_TRANSMEMBRANE_TRANSPORT	GO_REGULATION_OF_CATION_TRANSMEMBRANE_TRANSPORT		36	0.213956	1.50899	0.0810811	0.142621	1	1461	tags=83%, list=62%, signal=217%
GO_HEMOSTASIS	GO_HEMOSTASIS		63	0.164211	1.50607	0.0610236	0.144063	1	1450	tags=78%, list=62%, signal=198%
GO_PLASMA_MEMBRANE_ORGANIZATION	GO_PLASMA_MEMBRANE_ORGANIZATION		31	0.231139	1.50544	0.0763209	0.144064	1	1357	tags=81%, list=58%, signal=189%
GO_PATTERN_RECOGNITION_RECEPTOR_SIGNALING_PATHWAY	GO_PATTERN_RECOGNITION_RECEPTOR_SIGNALING_PATHWAY		38	0.205628	1.50479	0.0606654	0.144101	1	698	tags=50%, list=30%, signal=70%
GO_MACROMOLECULAR_COMPLEX_ASSEMBLY	GO_MACROMOLECULAR_COMPLEX_ASSEMBLY		164	0.104273	1.50276	0.0658683	0.145021	1	2062	tags=98%, list=88%, signal=745%
GO_REGULATION_OF_CYCLIN_DEPENDENT_PROTEIN_KINASE_ACTIVITY	GO_REGULATION_OF_CYCLIN_DEPENDENT_PROTEIN_KINASE_ACTIVITY		16	0.308426	1.50122	0.0644491	0.145645	1	307	tags=44%, list=13%, signal=50%
GO_RESPONSE_TO_TEMPERATURE_STIMULUS	GO_RESPONSE_TO_TEMPERATURE_STIMULUS		37	0.212474	1.49291	0.0873984	0.150623	1	1031	tags=65%, list=44%, signal=114%
GO_NEURON_MIGRATION	GO_NEURON_MIGRATION		15	0.314588	1.49171	0.0661323	0.150951	1	1300	tags=87%, list=55%, signal=193%
GO_NEURON_PROJECTION_MORPHOGENESIS	GO_NEURON_PROJECTION_MORPHOGENESIS		54	0.174465	1.48973	0.0618557	0.152043	1	1425	tags=78%, list=61%, signal=193%
GO_REGULATION_OF_COAGULATION	GO_REGULATION_OF_COAGULATION		33	0.219648	1.48658	0.0752475	0.153841	1	1127	tags=70%, list=48%, signal=132%
GO_REGULATION_OF_NEURON_DEATH	GO_REGULATION_OF_NEURON_DEATH		35	0.212488	1.48435	0.0797546	0.155033	1	1453	tags=83%, list=62%, signal=214%
GO_CYTOKINE_MEDIATED_SIGNALING_PATHWAY	GO_CYTOKINE_MEDIATED_SIGNALING_PATHWAY		83	0.141307	1.48376	0.0758755	0.155105	1	1348	tags=71%, list=57%, signal=161%
GO_NEGATIVE_REGULATION_OF_LEUKOCYTE_PROLIFERATION	GO_NEGATIVE_REGULATION_OF_LEUKOCYTE_PROLIFERATION		16	0.306497	1.48371	0.0947776	0.154731	1	1192	tags=81%, list=51%, signal=164%
GO_RESPONSE_TO_VITAMIN	GO_RESPONSE_TO_VITAMIN		21	0.267788	1.48023	0.083499	0.156777	1	1053	tags=71%, list=45%, signal=128%
GO_REGULATION_OF_BLOOD_CIRCULATION	GO_REGULATION_OF_BLOOD_CIRCULATION		44	0.188644	1.47954	0.068	0.156745	1	1272	tags=73%, list=54%, signal=156%
GO_REGULATION_OF_VASCULATURE_DEVELOPMENT	GO_REGULATION_OF_VASCULATURE_DEVELOPMENT		55	0.172842	1.47608	0.0752896	0.158776	1	1353	tags=75%, list=58%, signal=172%
GO_POSITIVE_REGULATION_OF_CELLULAR_COMPONENT_BIOGENESIS	GO_POSITIVE_REGULATION_OF_CELLULAR_COMPONENT_BIOGENESIS		67	0.154881	1.4759	0.0806452	0.158488	1	1433	tags=76%, list=61%, signal=190%
GO_MULTI_ORGANISM_REPRODUCTIVE_PROCESS	GO_MULTI_ORGANISM_REPRODUCTIVE_PROCESS		77	0.144721	1.4718	0.0726915	0.161121	1	1256	tags=68%, list=53%, signal=140%
GO_MEMBRANE_LIPID_METABOLIC_PROCESS	GO_MEMBRANE_LIPID_METABOLIC_PROCESS		23	0.254511	1.47098	0.0695825	0.161264	1	1449	tags=87%, list=62%, signal=225%
GO_REGULATION_OF_CALCIUM_ION_TRANSMEMBRANE_TRANSPORT	GO_REGULATION_OF_CALCIUM_ION_TRANSMEMBRANE_TRANSPORT		19	0.279022	1.4709	0.0785855	0.16091	1	1450	tags=89%, list=62%, signal=232%
GO_REGULATION_OF_CELL_SUBSTRATE_ADHESION	GO_REGULATION_OF_CELL_SUBSTRATE_ADHESION		28	0.231466	1.47055	0.0817996	0.16076	1	1223	tags=75%, list=52%, signal=155%
GO_REGULATION_OF_OSSIFICATION	GO_REGULATION_OF_OSSIFICATION		27	0.239185	1.46667	0.0898204	0.163174	1	1444	tags=85%, list=61%, signal=219%
GO_COGNITION	GO_COGNITION		27	0.234924	1.4666	0.0951417	0.162819	1	1193	tags=74%, list=51%, signal=149%
GO_REGULATION_OF_EXTENT_OF_CELL_GROWTH	GO_REGULATION_OF_EXTENT_OF_CELL_GROWTH		18	0.283119	1.46628	0.0968379	0.16261	1	1296	tags=83%, list=55%, signal=185%
GO_NEGATIVE_REGULATION_OF_VASCULATURE_DEVELOPMENT	GO_NEGATIVE_REGULATION_OF_VASCULATURE_DEVELOPMENT		20	0.277835	1.46611	0.0979592	0.162305	1	1348	tags=85%, list=57%, signal=198%
GO_REGULATION_OF_MITOTIC_CELL_CYCLE	GO_REGULATION_OF_MITOTIC_CELL_CYCLE		61	0.159669	1.46324	0.0783939	0.163946	1	1212	tags=67%, list=52%, signal=135%
GO_ENDOMEMBRANE_SYSTEM_ORGANIZATION	GO_ENDOMEMBRANE_SYSTEM_ORGANIZATION		56	0.16623	1.46054	0.0916179	0.165323	1	1379	tags=75%, list=59%, signal=177%
GO_MESENCHYME_DEVELOPMENT	GO_MESENCHYME_DEVELOPMENT		30	0.226345	1.46016	0.0840336	0.165147	1	1431	tags=83%, list=61%, signal=211%
GO_PROTEIN_LOCALIZATION	GO_PROTEIN_LOCALIZATION		190	0.0963953	1.45749	0.0720165	0.166695	1	1311	tags=65%, list=56%, signal=135%
GO_REGULATION_OF_CELL_MORPHOGENESIS_INVOLVED_IN_DIFFERENTIATION	GO_REGULATION_OF_CELL_MORPHOGENESIS_INVOLVED_IN_DIFFERENTIATION		51	0.176565	1.45205	0.0851927	0.170194	1	1435	tags=78%, list=61%, signal=197%
GO_RESPONSE_TO_IONIZING_RADIATION	GO_RESPONSE_TO_IONIZING_RADIATION		21	0.263388	1.44959	0.0752896	0.171628	1	616	tags=52%, list=26%, signal=70%
GO_SYSTEM_PROCESS	GO_SYSTEM_PROCESS		160	0.100171	1.44744	0.0933852	0.172789	1	1262	tags=63%, list=54%, signal=127%
GO_REGULATION_OF_DNA_METABOLIC_PROCESS	GO_REGULATION_OF_DNA_METABOLIC_PROCESS		39	0.20414	1.44629	0.090535	0.173172	1	1394	tags=79%, list=59%, signal=192%
GO_POSITIVE_REGULATION_OF_DNA_METABOLIC_PROCESS	GO_POSITIVE_REGULATION_OF_DNA_METABOLIC_PROCESS		26	0.240675	1.44384	0.0936255	0.174569	1	1156	tags=73%, list=49%, signal=142%
GO_HOMEOSTATIC_PROCESS	GO_HOMEOSTATIC_PROCESS		219	0.0867194	1.44382	0.0949495	0.17415	1	1176	tags=58%, list=50%, signal=105%
GO_CELLULAR_RESPONSE_TO_FATTY_ACID	GO_CELLULAR_RESPONSE_TO_FATTY_ACID		17	0.291745	1.44278	0.0763209	0.174488	1	562	tags=53%, list=24%, signal=69%
GO_NEGATIVE_REGULATION_OF_NEURON_DEATH	GO_NEGATIVE_REGULATION_OF_NEURON_DEATH		25	0.240654	1.44151	0.0854369	0.175036	1	567	tags=48%, list=24%, signal=63%
GO_REGULATION_OF_PEPTIDYL_SERINE_PHOSPHORYLATION	GO_REGULATION_OF_PEPTIDYL_SERINE_PHOSPHORYLATION		17	0.28632	1.43953	0.0903491	0.176054	1	989	tags=71%, list=42%, signal=121%
GO_CELLULAR_RESPONSE_TO_NITROGEN_COMPOUND	GO_CELLULAR_RESPONSE_TO_NITROGEN_COMPOUND		89	0.131907	1.4376	0.0835073	0.177017	1	1495	tags=76%, list=64%, signal=202%
GO_REGULATION_OF_PROTEIN_SERINE_THREONINE_KINASE_ACTIVITY	GO_REGULATION_OF_PROTEIN_SERINE_THREONINE_KINASE_ACTIVITY		91	0.128708	1.43636	0.0936864	0.177543	1	818	tags=47%, list=35%, signal=70%
GO_REGULATION_OF_MUSCLE_CONTRACTION	GO_REGULATION_OF_MUSCLE_CONTRACTION		23	0.251033	1.43478	0.107296	0.178312	1	1355	tags=83%, list=58%, signal=193%
GO_REGULATION_OF_CELLULAR_PROTEIN_LOCALIZATION	GO_REGULATION_OF_CELLULAR_PROTEIN_LOCALIZATION		69	0.144145	1.43366	0.0831722	0.178721	1	1440	tags=75%, list=61%, signal=189%
GO_CELLULAR_RESPONSE_TO_EXTERNAL_STIMULUS	GO_CELLULAR_RESPONSE_TO_EXTERNAL_STIMULUS		58	0.15838	1.43336	0.0989474	0.178522	1	1539	tags=81%, list=66%, signal=229%
GO_INTERSPECIES_INTERACTION_BETWEEN_ORGANISMS	GO_INTERSPECIES_INTERACTION_BETWEEN_ORGANISMS		58	0.160548	1.43116	0.0813954	0.179792	1	1615	tags=84%, list=69%, signal=264%
GO_LEUKOCYTE_MEDIATED_IMMUNITY	GO_LEUKOCYTE_MEDIATED_IMMUNITY		35	0.207473	1.42763	0.11575	0.182202	1	995	tags=63%, list=42%, signal=107%
GO_RESPONSE_TO_INTERLEUKIN_1	GO_RESPONSE_TO_INTERLEUKIN_1		18	0.280162	1.42169	0.113131	0.186429	1	1042	tags=72%, list=44%, signal=129%
GO_CELL_PART_MORPHOGENESIS	GO_CELL_PART_MORPHOGENESIS		70	0.139696	1.41376	0.114563	0.192108	1	1425	tags=74%, list=61%, signal=183%
GO_INTERACTION_WITH_HOST	GO_INTERACTION_WITH_HOST		20	0.262543	1.41271	0.10241	0.192399	1	1501	tags=90%, list=64%, signal=247%
GO_NEGATIVE_REGULATION_OF_CELL_PROLIFERATION	GO_NEGATIVE_REGULATION_OF_CELL_PROLIFERATION		93	0.125537	1.41207	0.114471	0.192464	1	1256	tags=66%, list=53%, signal=135%
GO_ACTIN_FILAMENT_ORGANIZATION	GO_ACTIN_FILAMENT_ORGANIZATION		39	0.19228	1.4112	0.113462	0.192749	1	1602	tags=87%, list=68%, signal=270%
GO_ANATOMICAL_STRUCTURE_FORMATION_INVOLVED_IN_MORPHOGENESIS	GO_ANATOMICAL_STRUCTURE_FORMATION_INVOLVED_IN_MORPHOGENESIS		135	0.106679	1.41096	0.098081	0.192514	1	1450	tags=72%, list=62%, signal=177%
GO_REGULATION_OF_JNK_CASCADE	GO_REGULATION_OF_JNK_CASCADE		26	0.230537	1.41049	0.0918164	0.192452	1	728	tags=54%, list=31%, signal=77%
GO_NEGATIVE_REGULATION_OF_MOLECULAR_FUNCTION	GO_NEGATIVE_REGULATION_OF_MOLECULAR_FUNCTION		160	0.096995	1.40988	0.11691	0.192432	1	770	tags=42%, list=33%, signal=58%
GO_CELL_CYCLE_G1_S_PHASE_TRANSITION	GO_CELL_CYCLE_G1_S_PHASE_TRANSITION		23	0.241964	1.40494	0.102273	0.195753	1	1274	tags=78%, list=54%, signal=169%
GO_REGULATION_OF_CELL_CYCLE_PHASE_TRANSITION	GO_REGULATION_OF_CELL_CYCLE_PHASE_TRANSITION		41	0.188398	1.4043	0.0942184	0.195854	1	767	tags=51%, list=33%, signal=75%
GO_NEURON_PROJECTION_DEVELOPMENT	GO_NEURON_PROJECTION_DEVELOPMENT		68	0.14693	1.40241	0.0888889	0.196926	1	1425	tags=75%, list=61%, signal=185%
GO_REGULATION_OF_INTERLEUKIN_1_PRODUCTION	GO_REGULATION_OF_INTERLEUKIN_1_PRODUCTION		16	0.29331	1.39903	0.128692	0.199322	1	1076	tags=75%, list=46%, signal=137%
GO_POSITIVE_REGULATION_OF_TRANSMEMBRANE_TRANSPORT	GO_POSITIVE_REGULATION_OF_TRANSMEMBRANE_TRANSPORT		18	0.267287	1.39163	0.10998	0.205085	1	1072	tags=72%, list=46%, signal=132%
GO_DNA_REPAIR	GO_DNA_REPAIR		38	0.191547	1.38888	0.124756	0.206987	1	298	tags=32%, list=13%, signal=36%
GO_NEGATIVE_REGULATION_OF_PROTEIN_METABOLIC_PROCESS	GO_NEGATIVE_REGULATION_OF_PROTEIN_METABOLIC_PROCESS		167	0.0954295	1.38825	0.109462	0.206997	1	761	tags=41%, list=32%, signal=57%
GO_NEGATIVE_REGULATION_OF_HOMOTYPIC_CELL_CELL_ADHESION	GO_NEGATIVE_REGULATION_OF_HOMOTYPIC_CELL_CELL_ADHESION		22	0.247987	1.38448	0.150407	0.209794	1	1450	tags=86%, list=62%, signal=224%
GO_NEGATIVE_REGULATION_OF_CELL_PROJECTION_ORGANIZATION	GO_NEGATIVE_REGULATION_OF_CELL_PROJECTION_ORGANIZATION		25	0.232596	1.38276	0.135524	0.210733	1	1431	tags=84%, list=61%, signal=213%
GO_DEVELOPMENTAL_MATURATION	GO_DEVELOPMENTAL_MATURATION		32	0.204987	1.38158	0.11245	0.211253	1	1432	tags=81%, list=61%, signal=205%
GO_CELL_JUNCTION_ASSEMBLY	GO_CELL_JUNCTION_ASSEMBLY		26	0.226562	1.38136	0.126953	0.210926	1	1550	tags=88%, list=66%, signal=257%
GO_CYTOKINE_PRODUCTION	GO_CYTOKINE_PRODUCTION		29	0.216592	1.38084	0.112266	0.210928	1	1197	tags=72%, list=51%, signal=146%
GO_NEGATIVE_REGULATION_OF_CELL_CELL_ADHESION	GO_NEGATIVE_REGULATION_OF_CELL_CELL_ADHESION		29	0.212235	1.38038	0.110403	0.210815	1	1450	tags=83%, list=62%, signal=214%
GO_CELLULAR_RESPONSE_TO_LIPID	GO_CELLULAR_RESPONSE_TO_LIPID		81	0.133363	1.37884	0.0907372	0.211583	1	1262	tags=67%, list=54%, signal=139%
GO_RESPONSE_TO_OXYGEN_LEVELS	GO_RESPONSE_TO_OXYGEN_LEVELS		63	0.147546	1.37502	0.1417	0.214357	1	1339	tags=71%, list=57%, signal=162%
GO_REGULATION_OF_SMOOTH_MUSCLE_CELL_PROLIFERATION	GO_REGULATION_OF_SMOOTH_MUSCLE_CELL_PROLIFERATION		19	0.263926	1.37315	0.126252	0.215458	1	1238	tags=79%, list=53%, signal=166%
GO_NEGATIVE_REGULATION_OF_HOMEOSTATIC_PROCESS	GO_NEGATIVE_REGULATION_OF_HOMEOSTATIC_PROCESS		18	0.274773	1.37215	0.122605	0.215768	1	1185	tags=78%, list=50%, signal=156%
GO_NEGATIVE_REGULATION_OF_MULTI_ORGANISM_PROCESS	GO_NEGATIVE_REGULATION_OF_MULTI_ORGANISM_PROCESS		20	0.250086	1.36943	0.112621	0.217594	1	356	tags=40%, list=15%, signal=47%
GO_REGULATION_OF_KINASE_ACTIVITY	GO_REGULATION_OF_KINASE_ACTIVITY		133	0.104696	1.36661	0.117521	0.219411	1	844	tags=46%, list=36%, signal=68%
GO_GLIOGENESIS	GO_GLIOGENESIS		21	0.245442	1.36629	0.118474	0.219158	1	1105	tags=71%, list=47%, signal=134%
GO_NEGATIVE_REGULATION_OF_CELL_COMMUNICATION	GO_NEGATIVE_REGULATION_OF_CELL_COMMUNICATION		170	0.0917355	1.36615	0.123529	0.218769	1	1208	tags=60%, list=51%, signal=115%
GO_ENZYME_LINKED_RECEPTOR_PROTEIN_SIGNALING_PATHWAY	GO_ENZYME_LINKED_RECEPTOR_PROTEIN_SIGNALING_PATHWAY		118	0.110215	1.36417	0.109731	0.220071	1	1166	tags=60%, list=50%, signal=114%
GO_REGULATION_OF_ION_HOMEOSTASIS	GO_REGULATION_OF_ION_HOMEOSTASIS		32	0.197215	1.36182	0.126214	0.221648	1	1450	tags=81%, list=62%, signal=210%
GO_ACTIVATION_OF_PROTEIN_KINASE_ACTIVITY	GO_ACTIVATION_OF_PROTEIN_KINASE_ACTIVITY		52	0.164634	1.3583	0.110204	0.22451	1	795	tags=50%, list=34%, signal=74%
GO_PROTEIN_OLIGOMERIZATION	GO_PROTEIN_OLIGOMERIZATION		58	0.153094	1.35829	0.115312	0.224006	1	1794	tags=91%, list=76%, signal=378%
GO_REGULATION_OF_NEURON_APOPTOTIC_PROCESS	GO_REGULATION_OF_NEURON_APOPTOTIC_PROCESS		27	0.22069	1.35738	0.129098	0.224308	1	1313	tags=78%, list=56%, signal=174%
GO_PROTEIN_LOCALIZATION_TO_CELL_PERIPHERY	GO_PROTEIN_LOCALIZATION_TO_CELL_PERIPHERY		22	0.242086	1.35065	0.133333	0.229696	1	1357	tags=82%, list=58%, signal=192%
GO_NEGATIVE_REGULATION_OF_ESTABLISHMENT_OF_PROTEIN_LOCALIZATION	GO_NEGATIVE_REGULATION_OF_ESTABLISHMENT_OF_PROTEIN_LOCALIZATION		31	0.210005	1.34641	0.139293	0.23312	1	1103	tags=68%, list=47%, signal=126%
GO_AMINOGLYCAN_METABOLIC_PROCESS	GO_AMINOGLYCAN_METABOLIC_PROCESS		30	0.208542	1.34572	0.138211	0.233191	1	1394	tags=80%, list=59%, signal=194%
GO_PLATELET_DEGRANULATION	GO_PLATELET_DEGRANULATION		29	0.211893	1.34407	0.1409	0.234276	1	965	tags=62%, list=41%, signal=104%
GO_NEURON_DEVELOPMENT	GO_NEURON_DEVELOPMENT		82	0.128883	1.3417	0.133858	0.235794	1	1425	tags=73%, list=61%, signal=180%
GO_POSITIVE_REGULATION_OF_CALCIUM_ION_TRANSPORT	GO_POSITIVE_REGULATION_OF_CALCIUM_ION_TRANSPORT		18	0.267287	1.34148	0.147177	0.23549	1	1072	tags=72%, list=46%, signal=132%
GO_REGULATION_OF_PEPTIDASE_ACTIVITY	GO_REGULATION_OF_PEPTIDASE_ACTIVITY		62	0.147532	1.34106	0.126294	0.235344	1	760	tags=47%, list=32%, signal=67%
GO_REGULATION_OF_DNA_REPLICATION	GO_REGULATION_OF_DNA_REPLICATION		18	0.26123	1.33494	0.151394	0.240452	1	1347	tags=83%, list=57%, signal=194%
GO_REGULATION_OF_PROTEOLYSIS	GO_REGULATION_OF_PROTEOLYSIS		102	0.114356	1.33488	0.144531	0.239977	1	732	tags=42%, list=31%, signal=59%
GO_REGULATION_OF_OSTEOBLAST_DIFFERENTIATION	GO_REGULATION_OF_OSTEOBLAST_DIFFERENTIATION		17	0.268882	1.32882	0.129666	0.24527	1	1444	tags=88%, list=61%, signal=228%
GO_REGULATION_OF_NEUROTRANSMITTER_LEVELS	GO_REGULATION_OF_NEUROTRANSMITTER_LEVELS		16	0.272191	1.32572	0.147117	0.247848	1	685	tags=56%, list=29%, signal=79%
GO_HUMORAL_IMMUNE_RESPONSE	GO_HUMORAL_IMMUNE_RESPONSE		25	0.226414	1.32362	0.161677	0.249375	1	694	tags=52%, list=30%, signal=73%
GO_POSITIVE_REGULATION_OF_CELL_SUBSTRATE_ADHESION	GO_POSITIVE_REGULATION_OF_CELL_SUBSTRATE_ADHESION		15	0.280497	1.32085	0.150097	0.251555	1	1223	tags=80%, list=52%, signal=166%
GO_REACTIVE_OXYGEN_SPECIES_METABOLIC_PROCESS	GO_REACTIVE_OXYGEN_SPECIES_METABOLIC_PROCESS		19	0.249328	1.32019	0.147436	0.251643	1	1272	tags=79%, list=54%, signal=171%
GO_CELL_PROJECTION_ASSEMBLY	GO_CELL_PROJECTION_ASSEMBLY		35	0.191625	1.31866	0.128459	0.252532	1	1300	tags=74%, list=55%, signal=164%
GO_PROTEIN_AUTOPHOSPHORYLATION	GO_PROTEIN_AUTOPHOSPHORYLATION		41	0.174791	1.31807	0.15098	0.252549	1	1142	tags=66%, list=49%, signal=126%
GO_POSITIVE_REGULATION_OF_OSSIFICATION	GO_POSITIVE_REGULATION_OF_OSSIFICATION		17	0.26974	1.31731	0.154135	0.252729	1	1442	tags=88%, list=61%, signal=227%
GO_MYELOID_LEUKOCYTE_DIFFERENTIATION	GO_MYELOID_LEUKOCYTE_DIFFERENTIATION		25	0.216737	1.31706	0.157058	0.252416	1	1280	tags=76%, list=55%, signal=165%
GO_RESPONSE_TO_ORGANIC_CYCLIC_COMPOUND	GO_RESPONSE_TO_ORGANIC_CYCLIC_COMPOUND		153	0.0912323	1.30862	0.149495	0.26024	1	1272	tags=63%, list=54%, signal=128%
GO_REGULATION_OF_GRANULOCYTE_CHEMOTAXIS	GO_REGULATION_OF_GRANULOCYTE_CHEMOTAXIS		16	0.27069	1.30483	0.151394	0.263363	1	982	tags=69%, list=42%, signal=117%
GO_AMEBOIDAL_TYPE_CELL_MIGRATION	GO_AMEBOIDAL_TYPE_CELL_MIGRATION		25	0.223435	1.30481	0.161228	0.262819	1	607	tags=48%, list=26%, signal=64%
GO_AGING	GO_AGING		51	0.159082	1.30354	0.158	0.263571	1	1291	tags=71%, list=55%, signal=153%
GO_APOPTOTIC_SIGNALING_PATHWAY	GO_APOPTOTIC_SIGNALING_PATHWAY		49	0.160203	1.29803	0.150943	0.268519	1	1212	tags=67%, list=52%, signal=136%
GO_REGULATION_OF_LEUKOCYTE_APOPTOTIC_PROCESS	GO_REGULATION_OF_LEUKOCYTE_APOPTOTIC_PROCESS		18	0.243062	1.29482	0.153226	0.271246	1	998	tags=67%, list=43%, signal=115%
GO_HEMATOPOIETIC_PROGENITOR_CELL_DIFFERENTIATION	GO_HEMATOPOIETIC_PROGENITOR_CELL_DIFFERENTIATION		20	0.240636	1.29335	0.15735	0.272147	1	965	tags=65%, list=41%, signal=109%
GO_DNA_REPLICATION	GO_DNA_REPLICATION		22	0.231885	1.28833	0.166667	0.276885	1	1274	tags=77%, list=54%, signal=167%
GO_EPITHELIAL_CELL_DEVELOPMENT	GO_EPITHELIAL_CELL_DEVELOPMENT		32	0.194624	1.2876	0.160417	0.277061	1	1456	tags=81%, list=62%, signal=211%
GO_POSITIVE_REGULATION_OF_GROWTH	GO_POSITIVE_REGULATION_OF_GROWTH		37	0.180991	1.28581	0.163636	0.278366	1	723	tags=49%, list=31%, signal=69%
GO_NEGATIVE_REGULATION_OF_CELL_DIFFERENTIATION	GO_NEGATIVE_REGULATION_OF_CELL_DIFFERENTIATION		74	0.131986	1.28502	0.196755	0.278538	1	1444	tags=74%, list=61%, signal=187%
GO_REGULATION_OF_PEPTIDE_TRANSPORT	GO_REGULATION_OF_PEPTIDE_TRANSPORT		41	0.169738	1.28356	0.164122	0.279404	1	1440	tags=78%, list=61%, signal=198%
GO_NEGATIVE_REGULATION_OF_INTRACELLULAR_TRANSPORT	GO_NEGATIVE_REGULATION_OF_INTRACELLULAR_TRANSPORT		20	0.245103	1.27769	0.179916	0.285117	1	1072	tags=70%, list=46%, signal=128%
GO_MEIOTIC_CELL_CYCLE	GO_MEIOTIC_CELL_CYCLE		20	0.233162	1.27571	0.176125	0.28671	1	865	tags=60%, list=37%, signal=94%
GO_TOLL_LIKE_RECEPTOR_SIGNALING_PATHWAY	GO_TOLL_LIKE_RECEPTOR_SIGNALING_PATHWAY		33	0.189816	1.27424	0.173387	0.287761	1	698	tags=48%, list=30%, signal=68%
GO_POSITIVE_REGULATION_OF_VASCULATURE_DEVELOPMENT	GO_POSITIVE_REGULATION_OF_VASCULATURE_DEVELOPMENT		30	0.192465	1.27198	0.18	0.289482	1	1353	tags=77%, list=58%, signal=179%
GO_REGULATION_OF_PEPTIDYL_TYROSINE_PHOSPHORYLATION	GO_REGULATION_OF_PEPTIDYL_TYROSINE_PHOSPHORYLATION		45	0.162928	1.27012	0.164384	0.290986	1	1450	tags=78%, list=62%, signal=199%
GO_MOVEMENT_IN_ENVIRONMENT_OF_OTHER_ORGANISM_INVOLVED_IN_SYMBIOTIC_INTERACTION	GO_MOVEMENT_IN_ENVIRONMENT_OF_OTHER_ORGANISM_INVOLVED_IN_SYMBIOTIC_INTERACTION		16	0.265652	1.26737	0.183206	0.293439	1	1434	tags=88%, list=61%, signal=223%
GO_RENAL_SYSTEM_PROCESS	GO_RENAL_SYSTEM_PROCESS		21	0.229889	1.26657	0.1917	0.293658	1	1253	tags=76%, list=53%, signal=162%
GO_CELL_CELL_JUNCTION_ASSEMBLY	GO_CELL_CELL_JUNCTION_ASSEMBLY		15	0.273439	1.26509	0.165703	0.294592	1	1396	tags=87%, list=59%, signal=212%
GO_POSITIVE_REGULATION_OF_PEPTIDE_SECRETION	GO_POSITIVE_REGULATION_OF_PEPTIDE_SECRETION		16	0.263079	1.26326	0.169524	0.295926	1	1440	tags=88%, list=61%, signal=225%
GO_VACUOLAR_TRANSPORT	GO_VACUOLAR_TRANSPORT		22	0.225084	1.2597	0.196	0.299326	1	1610	tags=91%, list=69%, signal=287%
GO_POSITIVE_REGULATION_OF_PROTEIN_COMPLEX_ASSEMBLY	GO_POSITIVE_REGULATION_OF_PROTEIN_COMPLEX_ASSEMBLY		33	0.182303	1.2591	0.176125	0.299342	1	1000	tags=61%, list=43%, signal=104%
GO_NEGATIVE_REGULATION_OF_DEVELOPMENTAL_GROWTH	GO_NEGATIVE_REGULATION_OF_DEVELOPMENTAL_GROWTH		22	0.222426	1.25889	0.200795	0.298931	1	1296	tags=77%, list=55%, signal=171%
GO_CELLULAR_TRANSITION_METAL_ION_HOMEOSTASIS	GO_CELLULAR_TRANSITION_METAL_ION_HOMEOSTASIS		16	0.263079	1.25843	0.177062	0.298817	1	1440	tags=88%, list=61%, signal=225%
GO_LIPOSACCHARIDE_METABOLIC_PROCESS	GO_LIPOSACCHARIDE_METABOLIC_PROCESS		15	0.268095	1.25795	0.177645	0.298681	1	1565	tags=93%, list=67%, signal=278%
GO_REGULATION_OF_PROTEIN_KINASE_B_SIGNALING	GO_REGULATION_OF_PROTEIN_KINASE_B_SIGNALING		23	0.219916	1.25221	0.205323	0.304529	1	1019	tags=65%, list=43%, signal=114%
GO_MALE_GAMETE_GENERATION	GO_MALE_GAMETE_GENERATION		32	0.185935	1.25092	0.201172	0.305294	1	1256	tags=72%, list=53%, signal=152%
GO_NEGATIVE_REGULATION_OF_CELL_MORPHOGENESIS_INVOLVED_IN_DIFFERENTIATION	GO_NEGATIVE_REGULATION_OF_CELL_MORPHOGENESIS_INVOLVED_IN_DIFFERENTIATION		19	0.237305	1.25066	0.19057	0.304993	1	1300	tags=79%, list=55%, signal=175%
GO_CELLULAR_RESPONSE_TO_KETONE	GO_CELLULAR_RESPONSE_TO_KETONE		19	0.237238	1.2475	0.188377	0.307951	1	1053	tags=68%, list=45%, signal=123%
GO_RESPONSE_TO_ETHANOL	GO_RESPONSE_TO_ETHANOL		19	0.239	1.24545	0.192913	0.309702	1	431	tags=42%, list=18%, signal=51%
GO_NEGATIVE_REGULATION_OF_WOUND_HEALING	GO_NEGATIVE_REGULATION_OF_WOUND_HEALING		18	0.241488	1.23935	0.216	0.315847	1	1393	tags=83%, list=59%, signal=203%
GO_REGULATION_OF_CYSTEINE_TYPE_ENDOPEPTIDASE_ACTIVITY	GO_REGULATION_OF_CYSTEINE_TYPE_ENDOPEPTIDASE_ACTIVITY		38	0.171132	1.23875	0.207739	0.315939	1	1272	tags=71%, list=54%, signal=153%
GO_NEGATIVE_REGULATION_OF_SEQUENCE_SPECIFIC_DNA_BINDING_TRANSCRIPTION_FACTOR_ACTIVITY	GO_NEGATIVE_REGULATION_OF_SEQUENCE_SPECIFIC_DNA_BINDING_TRANSCRIPTION_FACTOR_ACTIVITY		20	0.23067	1.23367	0.210526	0.321108	1	1223	tags=75%, list=52%, signal=155%
GO_RESPONSE_TO_RADIATION	GO_RESPONSE_TO_RADIATION		56	0.13971	1.22568	0.214433	0.330051	1	1314	tags=70%, list=56%, signal=154%
GO_REGULATION_OF_PROTEASOMAL_UBIQUITIN_DEPENDENT_PROTEIN_CATABOLIC_PROCESS	GO_REGULATION_OF_PROTEASOMAL_UBIQUITIN_DEPENDENT_PROTEIN_CATABOLIC_PROCESS		16	0.246569	1.22193	0.212982	0.333862	1	598	tags=50%, list=25%, signal=67%
GO_REGULATION_OF_REACTIVE_OXYGEN_SPECIES_METABOLIC_PROCESS	GO_REGULATION_OF_REACTIVE_OXYGEN_SPECIES_METABOLIC_PROCESS		30	0.191573	1.22168	0.213251	0.333514	1	1042	tags=63%, list=44%, signal=112%
GO_REGULATION_OF_WOUND_HEALING	GO_REGULATION_OF_WOUND_HEALING		39	0.164285	1.22156	0.212551	0.333033	1	1185	tags=67%, list=50%, signal=132%
GO_SINGLE_ORGANISM_CELLULAR_LOCALIZATION	GO_SINGLE_ORGANISM_CELLULAR_LOCALIZATION		92	0.108522	1.21434	0.226121	0.340871	1	1311	tags=66%, list=56%, signal=144%
GO_REGULATION_OF_MYELOID_CELL_DIFFERENTIATION	GO_REGULATION_OF_MYELOID_CELL_DIFFERENTIATION		30	0.186799	1.21355	0.208661	0.341162	1	740	tags=50%, list=32%, signal=72%
GO_CELLULAR_COMPONENT_DISASSEMBLY	GO_CELLULAR_COMPONENT_DISASSEMBLY		73	0.122975	1.2135	0.21501	0.340541	1	652	tags=40%, list=28%, signal=53%
GO_NEGATIVE_REGULATION_OF_PHOSPHORUS_METABOLIC_PROCESS	GO_NEGATIVE_REGULATION_OF_PHOSPHORUS_METABOLIC_PROCESS		93	0.10993	1.21251	0.217221	0.340982	1	761	tags=43%, list=32%, signal=61%
GO_POSITIVE_REGULATION_OF_CELL_DEVELOPMENT	GO_POSITIVE_REGULATION_OF_CELL_DEVELOPMENT		67	0.125011	1.20504	0.228632	0.349506	1	1396	tags=72%, list=59%, signal=172%
GO_REGULATION_OF_PEPTIDE_SECRETION	GO_REGULATION_OF_PEPTIDE_SECRETION		33	0.176648	1.20473	0.202783	0.349159	1	1440	tags=79%, list=61%, signal=201%
GO_ANION_TRANSPORT	GO_ANION_TRANSPORT		83	0.114758	1.2041	0.204633	0.349296	1	1493	tags=75%, list=64%, signal=198%
GO_ACTIN_FILAMENT_BASED_MOVEMENT	GO_ACTIN_FILAMENT_BASED_MOVEMENT		16	0.254074	1.20366	0.237805	0.349184	1	1461	tags=88%, list=62%, signal=230%
GO_INORGANIC_ANION_TRANSPORT	GO_INORGANIC_ANION_TRANSPORT		18	0.236719	1.1982	0.206287	0.355285	1	1665	tags=94%, list=71%, signal=322%
GO_DIGESTION	GO_DIGESTION		18	0.231712	1.19738	0.217565	0.355538	1	894	tags=61%, list=38%, signal=98%
GO_RESPONSE_TO_HORMONE	GO_RESPONSE_TO_HORMONE		142	0.0873035	1.19653	0.229541	0.355945	1	1493	tags=72%, list=64%, signal=185%
GO_POSITIVE_REGULATION_OF_I_KAPPAB_KINASE_NF_KAPPAB_SIGNALING	GO_POSITIVE_REGULATION_OF_I_KAPPAB_KINASE_NF_KAPPAB_SIGNALING		38	0.164252	1.19638	0.216963	0.355449	1	670	tags=45%, list=29%, signal=62%
GO_NEGATIVE_REGULATION_OF_PHOSPHORYLATION	GO_NEGATIVE_REGULATION_OF_PHOSPHORYLATION		78	0.115193	1.19354	0.21978	0.358258	1	761	tags=44%, list=32%, signal=62%
GO_SIGNAL_TRANSDUCTION_BY_P53_CLASS_MEDIATOR	GO_SIGNAL_TRANSDUCTION_BY_P53_CLASS_MEDIATOR		22	0.212655	1.19301	0.229675	0.358245	1	1212	tags=73%, list=52%, signal=149%
GO_NEGATIVE_REGULATION_OF_PROTEIN_MODIFICATION_BY_SMALL_PROTEIN_CONJUGATION_OR_REMOVAL	GO_NEGATIVE_REGULATION_OF_PROTEIN_MODIFICATION_BY_SMALL_PROTEIN_CONJUGATION_OR_REMOVAL		17	0.238878	1.19204	0.240557	0.358798	1	409	tags=41%, list=17%, signal=50%
GO_CENTRAL_NERVOUS_SYSTEM_DEVELOPMENT	GO_CENTRAL_NERVOUS_SYSTEM_DEVELOPMENT		98	0.103283	1.19139	0.243354	0.358985	1	1300	tags=65%, list=55%, signal=140%
GO_REGULATION_OF_MEMBRANE_POTENTIAL	GO_REGULATION_OF_MEMBRANE_POTENTIAL		38	0.164798	1.18575	0.238289	0.365534	1	1472	tags=79%, list=63%, signal=208%
GO_MULTICELLULAR_ORGANISM_REPRODUCTION	GO_MULTICELLULAR_ORGANISM_REPRODUCTION		70	0.122902	1.18477	0.25	0.36607	1	1262	tags=66%, list=54%, signal=138%
GO_REGULATION_OF_CELL_CYCLE	GO_REGULATION_OF_CELL_CYCLE		117	0.0934271	1.18342	0.247485	0.367043	1	212	tags=18%, list=9%, signal=19%
GO_RESPONSE_TO_INTERFERON_GAMMA	GO_RESPONSE_TO_INTERFERON_GAMMA		31	0.179487	1.18309	0.235294	0.366724	1	795	tags=52%, list=34%, signal=77%
GO_REGULATION_OF_SYNAPSE_STRUCTURE_OR_ACTIVITY	GO_REGULATION_OF_SYNAPSE_STRUCTURE_OR_ACTIVITY		24	0.203385	1.18213	0.245726	0.367255	1	1483	tags=83%, list=63%, signal=224%
GO_CELLULAR_RESPONSE_TO_ACID_CHEMICAL	GO_CELLULAR_RESPONSE_TO_ACID_CHEMICAL		44	0.154869	1.18137	0.251004	0.367534	1	496	tags=36%, list=21%, signal=45%
GO_PHOSPHOLIPID_METABOLIC_PROCESS	GO_PHOSPHOLIPID_METABOLIC_PROCESS		59	0.132306	1.18107	0.248954	0.367237	1	1487	tags=76%, list=63%, signal=203%
GO_AMINOGLYCAN_CATABOLIC_PROCESS	GO_AMINOGLYCAN_CATABOLIC_PROCESS		16	0.239601	1.175	0.239623	0.374371	1	1348	tags=81%, list=57%, signal=189%
GO_CELL_MORPHOGENESIS_INVOLVED_IN_NEURON_DIFFERENTIATION	GO_CELL_MORPHOGENESIS_INVOLVED_IN_NEURON_DIFFERENTIATION		48	0.145652	1.17453	0.246602	0.374317	1	1425	tags=75%, list=61%, signal=187%
GO_MONOVALENT_INORGANIC_CATION_HOMEOSTASIS	GO_MONOVALENT_INORGANIC_CATION_HOMEOSTASIS		20	0.221993	1.17334	0.24812	0.375187	1	1478	tags=85%, list=63%, signal=227%
GO_REGULATION_OF_DEFENSE_RESPONSE_TO_VIRUS	GO_REGULATION_OF_DEFENSE_RESPONSE_TO_VIRUS		24	0.199799	1.17224	0.242248	0.375849	1	1100	tags=67%, list=47%, signal=124%
GO_DNA_METABOLIC_PROCESS	GO_DNA_METABOLIC_PROCESS		60	0.134557	1.1722	0.264228	0.375206	1	239	tags=23%, list=10%, signal=25%
GO_NEGATIVE_REGULATION_OF_COAGULATION	GO_NEGATIVE_REGULATION_OF_COAGULATION		17	0.231509	1.169	0.260521	0.378671	1	1393	tags=82%, list=59%, signal=201%
GO_ESTABLISHMENT_OF_PROTEIN_LOCALIZATION	GO_ESTABLISHMENT_OF_PROTEIN_LOCALIZATION		149	0.0841505	1.16841	0.248566	0.378765	1	1311	tags=64%, list=56%, signal=135%
GO_CELLULAR_RESPONSE_TO_AMINO_ACID_STIMULUS	GO_CELLULAR_RESPONSE_TO_AMINO_ACID_STIMULUS		16	0.239494	1.16648	0.246548	0.380584	1	1495	tags=88%, list=64%, signal=239%
GO_POSITIVE_REGULATION_OF_ERK1_AND_ERK2_CASCADE	GO_POSITIVE_REGULATION_OF_ERK1_AND_ERK2_CASCADE		46	0.148963	1.16565	0.273092	0.380833	1	728	tags=46%, list=31%, signal=65%
GO_GOLGI_VESICLE_TRANSPORT	GO_GOLGI_VESICLE_TRANSPORT		31	0.18106	1.16509	0.260521	0.380869	1	1776	tags=94%, list=76%, signal=379%
GO_VASCULAR_ENDOTHELIAL_GROWTH_FACTOR_RECEPTOR_SIGNALING_PATHWAY	GO_VASCULAR_ENDOTHELIAL_GROWTH_FACTOR_RECEPTOR_SIGNALING_PATHWAY		19	0.221645	1.16282	0.266798	0.383155	1	595	tags=47%, list=25%, signal=63%
GO_POSITIVE_REGULATION_OF_ION_TRANSPORT	GO_POSITIVE_REGULATION_OF_ION_TRANSPORT		41	0.157167	1.16243	0.29249	0.382976	1	1469	tags=78%, list=63%, signal=205%
GO_MEIOTIC_CELL_CYCLE_PROCESS	GO_MEIOTIC_CELL_CYCLE_PROCESS		17	0.231963	1.16129	0.26226	0.383691	1	287	tags=35%, list=12%, signal=40%
GO_NEGATIVE_REGULATION_OF_CELL_CYCLE_PHASE_TRANSITION	GO_NEGATIVE_REGULATION_OF_CELL_CYCLE_PHASE_TRANSITION		20	0.215206	1.15614	0.277567	0.389738	1	1259	tags=75%, list=54%, signal=160%
GO_NEURON_PROJECTION_GUIDANCE	GO_NEURON_PROJECTION_GUIDANCE		28	0.183559	1.15374	0.278586	0.392213	1	1418	tags=79%, list=60%, signal=196%
GO_TUMOR_NECROSIS_FACTOR_MEDIATED_SIGNALING_PATHWAY	GO_TUMOR_NECROSIS_FACTOR_MEDIATED_SIGNALING_PATHWAY		16	0.241745	1.1536	0.264033	0.39165	1	1343	tags=81%, list=57%, signal=189%
GO_AMMONIUM_ION_METABOLIC_PROCESS	GO_AMMONIUM_ION_METABOLIC_PROCESS		29	0.175982	1.15259	0.273504	0.392159	1	1696	tags=90%, list=72%, signal=319%
GO_NEGATIVE_REGULATION_OF_PROTEIN_BINDING	GO_NEGATIVE_REGULATION_OF_PROTEIN_BINDING		15	0.254579	1.15205	0.262327	0.392117	1	1440	tags=87%, list=61%, signal=223%
GO_REGULATION_OF_SMALL_GTPASE_MEDIATED_SIGNAL_TRANSDUCTION	GO_REGULATION_OF_SMALL_GTPASE_MEDIATED_SIGNAL_TRANSDUCTION		58	0.129378	1.15182	0.264228	0.3917	1	1403	tags=72%, list=60%, signal=175%
GO_CELLULAR_RESPONSE_TO_REACTIVE_OXYGEN_SPECIES	GO_CELLULAR_RESPONSE_TO_REACTIVE_OXYGEN_SPECIES		17	0.231509	1.14933	0.262948	0.394143	1	1393	tags=82%, list=59%, signal=201%
GO_POSITIVE_REGULATION_OF_PROTEIN_KINASE_B_SIGNALING	GO_POSITIVE_REGULATION_OF_PROTEIN_KINASE_B_SIGNALING		15	0.246178	1.14681	0.284294	0.396799	1	990	tags=67%, list=42%, signal=115%
GO_REGULATION_OF_CALCIUM_ION_TRANSPORT_INTO_CYTOSOL	GO_REGULATION_OF_CALCIUM_ION_TRANSPORT_INTO_CYTOSOL		15	0.250293	1.14599	0.26616	0.397152	1	1450	tags=87%, list=62%, signal=225%
GO_REGULATION_OF_CYTOPLASMIC_TRANSPORT	GO_REGULATION_OF_CYTOPLASMIC_TRANSPORT		57	0.131008	1.14415	0.285714	0.398798	1	1223	tags=65%, list=52%, signal=132%
GO_ESTABLISHMENT_OF_PROTEIN_LOCALIZATION_TO_PLASMA_MEMBRANE	GO_ESTABLISHMENT_OF_PROTEIN_LOCALIZATION_TO_PLASMA_MEMBRANE		15	0.242778	1.14344	0.282565	0.398976	1	1311	tags=80%, list=56%, signal=180%
GO_PALLIUM_DEVELOPMENT	GO_PALLIUM_DEVELOPMENT		17	0.227597	1.14315	0.283401	0.398577	1	1264	tags=76%, list=54%, signal=164%
GO_RESPONSE_TO_REACTIVE_OXYGEN_SPECIES	GO_RESPONSE_TO_REACTIVE_OXYGEN_SPECIES		39	0.151992	1.14299	0.258383	0.39804	1	1394	tags=74%, list=59%, signal=180%
GO_REGULATION_OF_MUSCLE_TISSUE_DEVELOPMENT	GO_REGULATION_OF_MUSCLE_TISSUE_DEVELOPMENT		15	0.241492	1.14203	0.292818	0.398597	1	1314	tags=80%, list=56%, signal=181%
GO_CELLULAR_RESPONSE_TO_OXIDATIVE_STRESS	GO_CELLULAR_RESPONSE_TO_OXIDATIVE_STRESS		33	0.166215	1.13864	0.285714	0.402442	1	1393	tags=76%, list=59%, signal=184%
GO_RESPONSE_TO_FATTY_ACID	GO_RESPONSE_TO_FATTY_ACID		26	0.185351	1.13833	0.27833	0.402055	1	562	tags=42%, list=24%, signal=55%
GO_REGULATION_OF_SYSTEMIC_ARTERIAL_BLOOD_PRESSURE	GO_REGULATION_OF_SYSTEMIC_ARTERIAL_BLOOD_PRESSURE		22	0.201477	1.137	0.27112	0.403071	1	1238	tags=73%, list=53%, signal=152%
GO_GAMETE_GENERATION	GO_GAMETE_GENERATION		41	0.1502	1.13476	0.294821	0.405298	1	1256	tags=68%, list=53%, signal=144%
GO_REGULATION_OF_REPRODUCTIVE_PROCESS	GO_REGULATION_OF_REPRODUCTIVE_PROCESS		15	0.240577	1.1343	0.262626	0.405211	1	690	tags=53%, list=29%, signal=75%
GO_NEGATIVE_REGULATION_OF_INTRACELLULAR_SIGNAL_TRANSDUCTION	GO_NEGATIVE_REGULATION_OF_INTRACELLULAR_SIGNAL_TRANSDUCTION		71	0.115299	1.13095	0.294479	0.408963	1	927	tags=51%, list=39%, signal=81%
GO_NEGATIVE_REGULATION_OF_CELL_DEVELOPMENT	GO_NEGATIVE_REGULATION_OF_CELL_DEVELOPMENT		38	0.155799	1.13013	0.315895	0.409261	1	1431	tags=76%, list=61%, signal=192%
GO_MUSCLE_SYSTEM_PROCESS	GO_MUSCLE_SYSTEM_PROCESS		39	0.157799	1.12997	0.301969	0.408742	1	1501	tags=79%, list=64%, signal=217%
GO_POSITIVE_REGULATION_OF_CELLULAR_PROTEIN_LOCALIZATION	GO_POSITIVE_REGULATION_OF_CELLULAR_PROTEIN_LOCALIZATION		43	0.145397	1.12876	0.308617	0.409627	1	1302	tags=70%, list=55%, signal=154%
GO_POSITIVE_REGULATION_OF_CELL_GROWTH	GO_POSITIVE_REGULATION_OF_CELL_GROWTH		20	0.210052	1.12704	0.290514	0.411143	1	684	tags=50%, list=29%, signal=70%
GO_NEGATIVE_REGULATION_OF_NEURON_DIFFERENTIATION	GO_NEGATIVE_REGULATION_OF_NEURON_DIFFERENTIATION		25	0.192165	1.12691	0.294466	0.410542	1	1431	tags=80%, list=61%, signal=203%
GO_ESTABLISHMENT_OR_MAINTENANCE_OF_CELL_POLARITY	GO_ESTABLISHMENT_OR_MAINTENANCE_OF_CELL_POLARITY		21	0.206008	1.12319	0.299603	0.414981	1	1644	tags=90%, list=70%, signal=299%
GO_ORGANELLE_ASSEMBLY	GO_ORGANELLE_ASSEMBLY		45	0.141931	1.12183	0.289206	0.416067	1	1394	tags=73%, list=59%, signal=177%
GO_REGULATION_OF_EPITHELIAL_CELL_MIGRATION	GO_REGULATION_OF_EPITHELIAL_CELL_MIGRATION		34	0.160964	1.11623	0.293173	0.422829	1	1353	tags=74%, list=58%, signal=171%
GO_STEM_CELL_DIFFERENTIATION	GO_STEM_CELL_DIFFERENTIATION		31	0.166511	1.11459	0.30572	0.424245	1	1431	tags=77%, list=61%, signal=196%
GO_MESENCHYMAL_CELL_DIFFERENTIATION	GO_MESENCHYMAL_CELL_DIFFERENTIATION		25	0.192165	1.11199	0.330677	0.427041	1	1431	tags=80%, list=61%, signal=203%
GO_REGULATION_OF_ACTIN_FILAMENT_BUNDLE_ASSEMBLY	GO_REGULATION_OF_ACTIN_FILAMENT_BUNDLE_ASSEMBLY		17	0.228253	1.11173	0.310757	0.426618	1	710	tags=53%, list=30%, signal=75%
GO_INORGANIC_ION_TRANSMEMBRANE_TRANSPORT	GO_INORGANIC_ION_TRANSMEMBRANE_TRANSPORT		64	0.118515	1.11168	0.282474	0.425943	1	1526	tags=77%, list=65%, signal=213%
GO_CHEMICAL_HOMEOSTASIS	GO_CHEMICAL_HOMEOSTASIS		150	0.0791386	1.10829	0.320641	0.429728	1	1453	tags=69%, list=62%, signal=170%
GO_REGULATION_OF_DEPHOSPHORYLATION	GO_REGULATION_OF_DEPHOSPHORYLATION		22	0.202845	1.10816	0.31134	0.429127	1	1555	tags=86%, list=66%, signal=253%
GO_POSITIVE_REGULATION_OF_MULTI_ORGANISM_PROCESS	GO_POSITIVE_REGULATION_OF_MULTI_ORGANISM_PROCESS		22	0.201321	1.1042	0.313008	0.433719	1	598	tags=45%, list=25%, signal=60%
GO_LYMPHOCYTE_MEDIATED_IMMUNITY	GO_LYMPHOCYTE_MEDIATED_IMMUNITY		28	0.177956	1.10267	0.315094	0.435125	1	844	tags=54%, list=36%, signal=83%
GO_REGULATION_OF_PROTEASOMAL_PROTEIN_CATABOLIC_PROCESS	GO_REGULATION_OF_PROTEASOMAL_PROTEIN_CATABOLIC_PROCESS		18	0.215021	1.1012	0.293103	0.43634	1	672	tags=50%, list=29%, signal=70%
GO_REGULATION_OF_TOLL_LIKE_RECEPTOR_SIGNALING_PATHWAY	GO_REGULATION_OF_TOLL_LIKE_RECEPTOR_SIGNALING_PATHWAY		17	0.221768	1.09949	0.317814	0.437859	1	587	tags=47%, list=25%, signal=62%
GO_CELL_MATURATION	GO_CELL_MATURATION		20	0.204124	1.09484	0.317308	0.443717	1	1050	tags=65%, list=45%, signal=117%
GO_POSITIVE_REGULATION_OF_PEPTIDYL_TYROSINE_PHOSPHORYLATION	GO_POSITIVE_REGULATION_OF_PEPTIDYL_TYROSINE_PHOSPHORYLATION		33	0.161333	1.09422	0.321083	0.443906	1	1262	tags=70%, list=54%, signal=149%
GO_NEURON_DIFFERENTIATION	GO_NEURON_DIFFERENTIATION		98	0.0956009	1.08951	0.349301	0.449807	1	1485	tags=72%, list=63%, signal=189%
GO_POSITIVE_REGULATION_OF_REACTIVE_OXYGEN_SPECIES_METABOLIC_PROCESS	GO_POSITIVE_REGULATION_OF_REACTIVE_OXYGEN_SPECIES_METABOLIC_PROCESS		20	0.207646	1.08849	0.334653	0.450334	1	1394	tags=80%, list=59%, signal=195%
GO_REGULATION_OF_ALPHA_BETA_T_CELL_ACTIVATION	GO_REGULATION_OF_ALPHA_BETA_T_CELL_ACTIVATION		17	0.223206	1.08638	0.333333	0.452501	1	998	tags=65%, list=43%, signal=112%
GO_POSITIVE_REGULATION_OF_CELL_DEATH	GO_POSITIVE_REGULATION_OF_CELL_DEATH		106	0.0915541	1.08504	0.344	0.453583	1	1300	tags=64%, list=55%, signal=137%
GO_DEVELOPMENTAL_PROCESS_INVOLVED_IN_REPRODUCTION	GO_DEVELOPMENTAL_PROCESS_INVOLVED_IN_REPRODUCTION		58	0.12087	1.08075	0.340164	0.458818	1	1382	tags=71%, list=59%, signal=168%
GO_NEGATIVE_REGULATION_OF_MITOTIC_CELL_CYCLE	GO_NEGATIVE_REGULATION_OF_MITOTIC_CELL_CYCLE		26	0.177665	1.08068	0.321569	0.458114	1	1212	tags=69%, list=52%, signal=142%
GO_REGULATION_OF_MYELOID_LEUKOCYTE_DIFFERENTIATION	GO_REGULATION_OF_MYELOID_LEUKOCYTE_DIFFERENTIATION		18	0.214163	1.07969	0.340681	0.458781	1	674	tags=50%, list=29%, signal=70%
GO_REGULATION_OF_SIGNAL_TRANSDUCTION_BY_P53_CLASS_MEDIATOR	GO_REGULATION_OF_SIGNAL_TRANSDUCTION_BY_P53_CLASS_MEDIATOR		16	0.226522	1.07968	0.342967	0.458006	1	1085	tags=69%, list=46%, signal=127%
GO_GLIAL_CELL_DIFFERENTIATION	GO_GLIAL_CELL_DIFFERENTIATION		18	0.209871	1.07959	0.340771	0.457342	1	684	tags=50%, list=29%, signal=70%
GO_CELLULAR_GLUCOSE_HOMEOSTASIS	GO_CELLULAR_GLUCOSE_HOMEOSTASIS		21	0.199439	1.07816	0.350598	0.458581	1	653	tags=48%, list=28%, signal=65%
GO_POSITIVE_REGULATION_OF_CELL_MORPHOGENESIS_INVOLVED_IN_DIFFERENTIATION	GO_POSITIVE_REGULATION_OF_CELL_MORPHOGENESIS_INVOLVED_IN_DIFFERENTIATION		29	0.16309	1.07122	0.351297	0.468091	1	1483	tags=79%, list=63%, signal=213%
GO_REGULATION_OF_PROTEIN_TARGETING	GO_REGULATION_OF_PROTEIN_TARGETING		37	0.146631	1.0701	0.325153	0.468889	1	1437	tags=76%, list=61%, signal=192%
GO_CARBOHYDRATE_DERIVATIVE_CATABOLIC_PROCESS	GO_CARBOHYDRATE_DERIVATIVE_CATABOLIC_PROCESS		31	0.162738	1.06812	0.358025	0.47104	1	1364	tags=74%, list=58%, signal=175%
GO_REGULATION_OF_NUCLEOCYTOPLASMIC_TRANSPORT	GO_REGULATION_OF_NUCLEOCYTOPLASMIC_TRANSPORT		31	0.158213	1.0633	0.348249	0.477328	1	1223	tags=68%, list=52%, signal=140%
GO_POSITIVE_REGULATION_OF_PROTEIN_SERINE_THREONINE_KINASE_ACTIVITY	GO_POSITIVE_REGULATION_OF_PROTEIN_SERINE_THREONINE_KINASE_ACTIVITY		54	0.126013	1.06323	0.349693	0.476651	1	710	tags=43%, list=30%, signal=60%
GO_NEGATIVE_REGULATION_OF_CATABOLIC_PROCESS	GO_NEGATIVE_REGULATION_OF_CATABOLIC_PROCESS		27	0.171685	1.05581	0.373333	0.486869	1	818	tags=52%, list=35%, signal=79%
GO_POSITIVE_REGULATION_OF_PROTEIN_MODIFICATION_BY_SMALL_PROTEIN_CONJUGATION_OR_REMOVAL	GO_POSITIVE_REGULATION_OF_PROTEIN_MODIFICATION_BY_SMALL_PROTEIN_CONJUGATION_OR_REMOVAL		15	0.226832	1.05177	0.386847	0.491835	1	409	tags=40%, list=17%, signal=48%
GO_POSITIVE_REGULATION_OF_MITOCHONDRION_ORGANIZATION	GO_POSITIVE_REGULATION_OF_MITOCHONDRION_ORGANIZATION		17	0.212633	1.0512	0.380952	0.491857	1	1437	tags=82%, list=61%, signal=211%
GO_PROTEOLYSIS	GO_PROTEOLYSIS		130	0.0808559	1.05086	0.36747	0.491535	1	1680	tags=79%, list=72%, signal=263%
GO_MUSCLE_CELL_DIFFERENTIATION	GO_MUSCLE_CELL_DIFFERENTIATION		29	0.166555	1.04972	0.396694	0.492366	1	1394	tags=76%, list=59%, signal=184%
GO_ALCOHOL_BIOSYNTHETIC_PROCESS	GO_ALCOHOL_BIOSYNTHETIC_PROCESS		21	0.194139	1.04962	0.368317	0.491687	1	1448	tags=81%, list=62%, signal=209%
GO_PROTEIN_DNA_COMPLEX_SUBUNIT_ORGANIZATION	GO_PROTEIN_DNA_COMPLEX_SUBUNIT_ORGANIZATION		23	0.178195	1.04619	0.373016	0.496127	1	1116	tags=65%, list=48%, signal=123%
GO_PROTEIN_STABILIZATION	GO_PROTEIN_STABILIZATION		16	0.220304	1.04569	0.383367	0.496042	1	1393	tags=81%, list=59%, signal=198%
GO_REGULATION_OF_CAMP_METABOLIC_PROCESS	GO_REGULATION_OF_CAMP_METABOLIC_PROCESS		15	0.224775	1.04448	0.350202	0.497048	1	1353	tags=80%, list=58%, signal=188%
GO_SKELETAL_SYSTEM_MORPHOGENESIS	GO_SKELETAL_SYSTEM_MORPHOGENESIS		20	0.193385	1.04399	0.38193	0.496999	1	488	tags=40%, list=21%, signal=50%
GO_MUSCLE_CELL_DEVELOPMENT	GO_MUSCLE_CELL_DEVELOPMENT		16	0.219876	1.04319	0.419422	0.497231	1	1394	tags=81%, list=59%, signal=199%
GO_POSITIVE_REGULATION_OF_DEVELOPMENTAL_GROWTH	GO_POSITIVE_REGULATION_OF_DEVELOPMENTAL_GROWTH		28	0.166256	1.03569	0.409182	0.50738	1	368	tags=32%, list=16%, signal=38%
GO_REGENERATION	GO_REGENERATION		38	0.144042	1.03354	0.4	0.509764	1	1211	tags=66%, list=52%, signal=134%
GO_EPITHELIAL_CELL_DIFFERENTIATION	GO_EPITHELIAL_CELL_DIFFERENTIATION		80	0.101102	1.03181	0.386555	0.511517	1	1472	tags=73%, list=63%, signal=188%
GO_POSITIVE_REGULATION_OF_STRESS_ACTIVATED_PROTEIN_KINASE_SIGNALING_CASCADE	GO_POSITIVE_REGULATION_OF_STRESS_ACTIVATED_PROTEIN_KINASE_SIGNALING_CASCADE		20	0.191151	1.02828	0.397338	0.516278	1	728	tags=50%, list=31%, signal=72%
GO_REGULATION_OF_PROTEIN_IMPORT	GO_REGULATION_OF_PROTEIN_IMPORT		28	0.159175	1.02644	0.41556	0.518194	1	1223	tags=68%, list=52%, signal=140%
GO_DNA_INTEGRITY_CHECKPOINT	GO_DNA_INTEGRITY_CHECKPOINT		24	0.17434	1.02644	0.429158	0.517346	1	1257	tags=71%, list=54%, signal=151%
GO_MITOTIC_DNA_INTEGRITY_CHECKPOINT	GO_MITOTIC_DNA_INTEGRITY_CHECKPOINT		15	0.218117	1.02197	0.407708	0.523434	1	1212	tags=73%, list=52%, signal=151%
GO_POSITIVE_REGULATION_OF_WOUND_HEALING	GO_POSITIVE_REGULATION_OF_WOUND_HEALING		16	0.209691	1.01958	0.422	0.526262	1	684	tags=50%, list=29%, signal=70%
GO_FATTY_ACID_DERIVATIVE_METABOLIC_PROCESS	GO_FATTY_ACID_DERIVATIVE_METABOLIC_PROCESS		16	0.215695	1.01699	0.419028	0.52938	1	1257	tags=75%, list=54%, signal=160%
GO_AMINO_ACID_TRANSPORT	GO_AMINO_ACID_TRANSPORT		20	0.187457	1.01463	0.42348	0.532211	1	1441	tags=80%, list=61%, signal=205%
GO_SIGNAL_TRANSDUCTION_BY_PROTEIN_PHOSPHORYLATION	GO_SIGNAL_TRANSDUCTION_BY_PROTEIN_PHOSPHORYLATION		51	0.12352	1.01393	0.429719	0.532517	1	1741	tags=86%, list=74%, signal=326%
GO_REGULATION_OF_CELL_GROWTH	GO_REGULATION_OF_CELL_GROWTH		67	0.107396	1.01152	0.413793	0.53534	1	1296	tags=66%, list=55%, signal=142%
GO_POSITIVE_REGULATION_OF_NUCLEOTIDE_METABOLIC_PROCESS	GO_POSITIVE_REGULATION_OF_NUCLEOTIDE_METABOLIC_PROCESS		16	0.207011	1.00593	0.436709	0.543367	1	1424	tags=81%, list=61%, signal=205%
GO_NUCLEUS_ORGANIZATION	GO_NUCLEUS_ORGANIZATION		18	0.198808	1.00489	0.432099	0.544081	1	188	tags=28%, list=8%, signal=30%
GO_RESPONSE_TO_HYDROGEN_PEROXIDE	GO_RESPONSE_TO_HYDROGEN_PEROXIDE		22	0.180294	1.00469	0.447853	0.543533	1	1394	tags=77%, list=59%, signal=188%
GO_REGULATION_OF_TRANSCRIPTION_FACTOR_IMPORT_INTO_NUCLEUS	GO_REGULATION_OF_TRANSCRIPTION_FACTOR_IMPORT_INTO_NUCLEUS		15	0.213402	1.00395	0.459048	0.54386	1	1223	tags=73%, list=52%, signal=152%
GO_POSITIVE_REGULATION_OF_NERVOUS_SYSTEM_DEVELOPMENT	GO_POSITIVE_REGULATION_OF_NERVOUS_SYSTEM_DEVELOPMENT		60	0.111713	1.0013	0.441057	0.547071	1	1387	tags=70%, list=59%, signal=167%
GO_ACTIVATION_OF_MAPK_ACTIVITY	GO_ACTIVATION_OF_MAPK_ACTIVITY		27	0.160483	1.00121	0.432596	0.546358	1	844	tags=52%, list=36%, signal=80%
GO_PROTEIN_SECRETION	GO_PROTEIN_SECRETION		23	0.173763	0.999318	0.463511	0.548555	1	1943	tags=100%, list=83%, signal=574%
GO_CELLULAR_RESPONSE_TO_DNA_DAMAGE_STIMULUS	GO_CELLULAR_RESPONSE_TO_DNA_DAMAGE_STIMULUS		76	0.0983367	0.997275	0.439834	0.550934	1	239	tags=20%, list=10%, signal=21%
GO_POSITIVE_REGULATION_OF_CYTOPLASMIC_TRANSPORT	GO_POSITIVE_REGULATION_OF_CYTOPLASMIC_TRANSPORT		33	0.147444	0.994895	0.462777	0.553818	1	1223	tags=67%, list=52%, signal=137%
GO_NEGATIVE_REGULATION_OF_NERVOUS_SYSTEM_DEVELOPMENT	GO_NEGATIVE_REGULATION_OF_NERVOUS_SYSTEM_DEVELOPMENT		36	0.142541	0.993237	0.462926	0.555565	1	1300	tags=69%, list=55%, signal=153%
GO_CELLULAR_RESPONSE_TO_EXTRACELLULAR_STIMULUS	GO_CELLULAR_RESPONSE_TO_EXTRACELLULAR_STIMULUS		42	0.132202	0.992605	0.479744	0.555674	1	1539	tags=79%, list=66%, signal=224%
GO_REGULATION_OF_HORMONE_SECRETION	GO_REGULATION_OF_HORMONE_SECRETION		36	0.138408	0.991677	0.457426	0.556237	1	1440	tags=75%, list=61%, signal=191%
GO_REGULATION_OF_PROTEIN_LOCALIZATION_TO_NUCLEUS	GO_REGULATION_OF_PROTEIN_LOCALIZATION_TO_NUCLEUS		34	0.143678	0.991233	0.462777	0.556073	1	1393	tags=74%, list=59%, signal=178%
GO_REGULATION_OF_CYCLIC_NUCLEOTIDE_METABOLIC_PROCESS	GO_REGULATION_OF_CYCLIC_NUCLEOTIDE_METABOLIC_PROCESS		19	0.184064	0.986738	0.457831	0.562448	1	1424	tags=79%, list=61%, signal=199%
GO_EYE_MORPHOGENESIS	GO_EYE_MORPHOGENESIS		18	0.191512	0.986717	0.411523	0.561589	1	205	tags=28%, list=9%, signal=30%
GO_POSITIVE_REGULATION_OF_NEURON_DIFFERENTIATION	GO_POSITIVE_REGULATION_OF_NEURON_DIFFERENTIATION		48	0.120435	0.98254	0.469388	0.567198	1	1483	tags=75%, list=63%, signal=199%
GO_NEGATIVE_REGULATION_OF_CELLULAR_CATABOLIC_PROCESS	GO_NEGATIVE_REGULATION_OF_CELLULAR_CATABOLIC_PROCESS		21	0.176581	0.978943	0.444215	0.572247	1	818	tags=52%, list=35%, signal=80%
GO_ION_TRANSMEMBRANE_TRANSPORT	GO_ION_TRANSMEMBRANE_TRANSPORT		104	0.0821336	0.97411	0.477642	0.578927	1	1666	tags=79%, list=71%, signal=259%
GO_NEUROLOGICAL_SYSTEM_PROCESS	GO_NEUROLOGICAL_SYSTEM_PROCESS		70	0.0989214	0.974089	0.447471	0.578048	1	1216	tags=61%, list=52%, signal=124%
GO_REGULATION_OF_CELLULAR_RESPONSE_TO_STRESS	GO_REGULATION_OF_CELLULAR_RESPONSE_TO_STRESS		82	0.0928573	0.965261	0.5	0.591132	1	1478	tags=72%, list=63%, signal=187%
GO_OSSIFICATION	GO_OSSIFICATION		54	0.112742	0.960802	0.492408	0.597336	1	610	tags=37%, list=26%, signal=49%
GO_ANION_TRANSMEMBRANE_TRANSPORT	GO_ANION_TRANSMEMBRANE_TRANSPORT		42	0.125614	0.95995	0.509542	0.597758	1	1666	tags=83%, list=71%, signal=282%
GO_HEAD_DEVELOPMENT	GO_HEAD_DEVELOPMENT		78	0.0925223	0.957798	0.480167	0.600278	1	1264	tags=63%, list=54%, signal=132%
GO_RESPONSE_TO_OXIDATIVE_STRESS	GO_RESPONSE_TO_OXIDATIVE_STRESS		67	0.100002	0.952368	0.514911	0.608111	1	1418	tags=70%, list=60%, signal=172%
GO_CELLULAR_RESPONSE_TO_ALCOHOL	GO_CELLULAR_RESPONSE_TO_ALCOHOL		25	0.157469	0.938456	0.505071	0.62973	1	1042	tags=60%, list=44%, signal=107%
GO_ORGAN_REGENERATION	GO_ORGAN_REGENERATION		28	0.146613	0.928142	0.518027	0.645459	1	749	tags=46%, list=32%, signal=67%
GO_KIDNEY_EPITHELIUM_DEVELOPMENT	GO_KIDNEY_EPITHELIUM_DEVELOPMENT		18	0.182022	0.923023	0.565041	0.652979	1	488	tags=39%, list=21%, signal=49%
GO_UNSATURATED_FATTY_ACID_METABOLIC_PROCESS	GO_UNSATURATED_FATTY_ACID_METABOLIC_PROCESS		18	0.179924	0.922339	0.555102	0.653038	1	1406	tags=78%, list=60%, signal=192%
GO_REGULATION_OF_I_KAPPAB_KINASE_NF_KAPPAB_SIGNALING	GO_REGULATION_OF_I_KAPPAB_KINASE_NF_KAPPAB_SIGNALING		48	0.114058	0.920462	0.546748	0.655178	1	715	tags=42%, list=30%, signal=59%
GO_CEREBRAL_CORTEX_DEVELOPMENT	GO_CEREBRAL_CORTEX_DEVELOPMENT		15	0.195828	0.917847	0.556237	0.658509	1	1264	tags=73%, list=54%, signal=158%
GO_NEGATIVE_REGULATION_OF_MAPK_CASCADE	GO_NEGATIVE_REGULATION_OF_MAPK_CASCADE		31	0.138499	0.916997	0.541922	0.658869	1	587	tags=39%, list=25%, signal=51%
GO_POSITIVE_REGULATION_OF_EXOCYTOSIS	GO_POSITIVE_REGULATION_OF_EXOCYTOSIS		15	0.202086	0.915885	0.53229	0.659758	1	1719	tags=93%, list=73%, signal=346%
GO_OVULATION_CYCLE	GO_OVULATION_CYCLE		17	0.180836	0.908915	0.540918	0.670445	1	1373	tags=76%, list=58%, signal=183%
GO_POSITIVE_REGULATION_OF_TYPE_I_INTERFERON_PRODUCTION	GO_POSITIVE_REGULATION_OF_TYPE_I_INTERFERON_PRODUCTION		15	0.193199	0.902023	0.593429	0.68091	1	644	tags=47%, list=27%, signal=64%
GO_LONG_CHAIN_FATTY_ACID_METABOLIC_PROCESS	GO_LONG_CHAIN_FATTY_ACID_METABOLIC_PROCESS		16	0.185785	0.901567	0.574427	0.680588	1	593	tags=44%, list=25%, signal=58%
GO_RESPONSE_TO_AMINO_ACID	GO_RESPONSE_TO_AMINO_ACID		27	0.142276	0.901154	0.581673	0.680269	1	1495	tags=78%, list=64%, signal=212%
GO_NUCLEOSIDE_TRIPHOSPHATE_METABOLIC_PROCESS	GO_NUCLEOSIDE_TRIPHOSPHATE_METABOLIC_PROCESS		27	0.144382	0.895568	0.58642	0.688471	1	1751	tags=89%, list=75%, signal=346%
GO_RESPONSE_TO_DRUG	GO_RESPONSE_TO_DRUG		71	0.0923936	0.893849	0.571146	0.690226	1	1376	tags=68%, list=59%, signal=158%
GO_BEHAVIOR	GO_BEHAVIOR		45	0.112452	0.889649	0.597222	0.696163	1	1201	tags=62%, list=51%, signal=125%
GO_MORPHOGENESIS_OF_AN_EPITHELIUM	GO_MORPHOGENESIS_OF_AN_EPITHELIUM		61	0.0966976	0.887874	0.578431	0.698095	1	1433	tags=70%, list=61%, signal=176%
GO_REGULATION_OF_PHOSPHATASE_ACTIVITY	GO_REGULATION_OF_PHOSPHATASE_ACTIVITY		16	0.18675	0.886436	0.586279	0.699469	1	1031	tags=63%, list=44%, signal=111%
GO_NUCLEOSIDE_MONOPHOSPHATE_METABOLIC_PROCESS	GO_NUCLEOSIDE_MONOPHOSPHATE_METABOLIC_PROCESS		33	0.134511	0.883516	0.576375	0.703412	1	1751	tags=88%, list=75%, signal=341%
GO_NEGATIVE_REGULATION_OF_HEMOPOIESIS	GO_NEGATIVE_REGULATION_OF_HEMOPOIESIS		19	0.167793	0.883362	0.612903	0.702588	1	844	tags=53%, list=36%, signal=82%
GO_REGULATION_OF_CELLULAR_PROTEIN_CATABOLIC_PROCESS	GO_REGULATION_OF_CELLULAR_PROTEIN_CATABOLIC_PROCESS		28	0.143658	0.881829	0.588349	0.704083	1	672	tags=43%, list=29%, signal=59%
GO_SINGLE_ORGANISM_BEHAVIOR	GO_SINGLE_ORGANISM_BEHAVIOR		33	0.129668	0.880868	0.584493	0.70452	1	1193	tags=64%, list=51%, signal=128%
GO_REGULATION_OF_EMBRYONIC_DEVELOPMENT	GO_REGULATION_OF_EMBRYONIC_DEVELOPMENT		18	0.171388	0.877681	0.602339	0.708732	1	1165	tags=67%, list=50%, signal=131%
GO_REGULATION_OF_RAS_PROTEIN_SIGNAL_TRANSDUCTION	GO_REGULATION_OF_RAS_PROTEIN_SIGNAL_TRANSDUCTION		36	0.121299	0.876572	0.584179	0.709562	1	1610	tags=81%, list=69%, signal=252%
GO_LIPID_MODIFICATION	GO_LIPID_MODIFICATION		35	0.127058	0.873378	0.619342	0.713876	1	1181	tags=63%, list=50%, signal=125%
GO_ALCOHOL_METABOLIC_PROCESS	GO_ALCOHOL_METABOLIC_PROCESS		63	0.0941892	0.873339	0.595041	0.71287	1	1610	tags=78%, list=69%, signal=241%
GO_PROTEIN_LOCALIZATION_TO_MEMBRANE	GO_PROTEIN_LOCALIZATION_TO_MEMBRANE		44	0.112492	0.871959	0.608108	0.714081	1	1821	tags=89%, list=78%, signal=388%
GO_POSITIVE_REGULATION_OF_CELLULAR_PROTEIN_CATABOLIC_PROCESS	GO_POSITIVE_REGULATION_OF_CELLULAR_PROTEIN_CATABOLIC_PROCESS		19	0.167296	0.871702	0.608268	0.713391	1	598	tags=42%, list=25%, signal=56%
GO_TRANSITION_METAL_ION_HOMEOSTASIS	GO_TRANSITION_METAL_ION_HOMEOSTASIS		23	0.151248	0.866451	0.63	0.720936	1	1587	tags=83%, list=68%, signal=252%
GO_DETECTION_OF_STIMULUS	GO_DETECTION_OF_STIMULUS		24	0.149885	0.866251	0.621782	0.720198	1	1216	tags=67%, list=52%, signal=137%
GO_RESPONSE_TO_STEROID_HORMONE	GO_RESPONSE_TO_STEROID_HORMONE		74	0.0853598	0.861061	0.629032	0.727917	1	1201	tags=59%, list=51%, signal=118%
GO_NITROGEN_COMPOUND_TRANSPORT	GO_NITROGEN_COMPOUND_TRANSPORT		62	0.0925831	0.860473	0.639583	0.727699	1	1946	tags=92%, list=83%, signal=523%
GO_RESPONSE_TO_ALCOHOL	GO_RESPONSE_TO_ALCOHOL		65	0.0911284	0.859938	0.654	0.727465	1	1272	tags=63%, list=54%, signal=134%
GO_TISSUE_MORPHOGENESIS	GO_TISSUE_MORPHOGENESIS		78	0.0843782	0.857601	0.640151	0.730091	1	1433	tags=69%, list=61%, signal=172%
GO_REGULATION_OF_NUCLEOTIDE_METABOLIC_PROCESS	GO_REGULATION_OF_NUCLEOTIDE_METABOLIC_PROCESS		27	0.138494	0.855029	0.657744	0.733326	1	982	tags=56%, list=42%, signal=94%
GO_VIRAL_LIFE_CYCLE	GO_VIRAL_LIFE_CYCLE		24	0.146586	0.85479	0.656	0.732649	1	1615	tags=83%, list=69%, signal=264%
GO_TISSUE_MIGRATION	GO_TISSUE_MIGRATION		16	0.179781	0.854057	0.63253	0.732776	1	607	tags=44%, list=26%, signal=59%
GO_NEGATIVE_REGULATION_OF_PROTEIN_COMPLEX_ASSEMBLY	GO_NEGATIVE_REGULATION_OF_PROTEIN_COMPLEX_ASSEMBLY		17	0.172256	0.853067	0.627615	0.73336	1	1393	tags=76%, list=59%, signal=187%
GO_REGULATION_OF_INTRACELLULAR_PROTEIN_TRANSPORT	GO_REGULATION_OF_INTRACELLULAR_PROTEIN_TRANSPORT		46	0.107052	0.852343	0.648855	0.733427	1	1437	tags=72%, list=61%, signal=181%
GO_POSITIVE_REGULATION_OF_INTRACELLULAR_PROTEIN_TRANSPORT	GO_POSITIVE_REGULATION_OF_INTRACELLULAR_PROTEIN_TRANSPORT		31	0.131232	0.851432	0.644269	0.73376	1	1437	tags=74%, list=61%, signal=189%
GO_CELLULAR_PROTEIN_COMPLEX_ASSEMBLY	GO_CELLULAR_PROTEIN_COMPLEX_ASSEMBLY		35	0.120944	0.850425	0.649694	0.734315	1	1866	tags=91%, list=79%, signal=439%
GO_NEGATIVE_REGULATION_OF_CELL_CYCLE_PROCESS	GO_NEGATIVE_REGULATION_OF_CELL_CYCLE_PROCESS		27	0.139068	0.850103	0.6417	0.733787	1	198	tags=22%, list=8%, signal=24%
GO_CELLULAR_RESPONSE_TO_STARVATION	GO_CELLULAR_RESPONSE_TO_STARVATION		25	0.145674	0.848261	0.649903	0.735591	1	1539	tags=80%, list=66%, signal=230%
GO_POLYOL_METABOLIC_PROCESS	GO_POLYOL_METABOLIC_PROCESS		15	0.181855	0.847271	0.641326	0.736133	1	827	tags=53%, list=35%, signal=82%
GO_SEXUAL_REPRODUCTION	GO_SEXUAL_REPRODUCTION		56	0.0943344	0.845705	0.643299	0.737513	1	1418	tags=70%, list=60%, signal=172%
GO_POSITIVE_REGULATION_OF_MAP_KINASE_ACTIVITY	GO_POSITIVE_REGULATION_OF_MAP_KINASE_ACTIVITY		42	0.110106	0.844746	0.662162	0.737929	1	975	tags=52%, list=42%, signal=88%
GO_CHROMATIN_ORGANIZATION	GO_CHROMATIN_ORGANIZATION		51	0.0983551	0.842556	0.660886	0.740444	1	2029	tags=96%, list=86%, signal=692%
GO_REGULATION_OF_CELL_MATRIX_ADHESION	GO_REGULATION_OF_CELL_MATRIX_ADHESION		16	0.174635	0.841214	0.657201	0.741483	1	1206	tags=69%, list=51%, signal=140%
GO_INTERFERON_GAMMA_MEDIATED_SIGNALING_PATHWAY	GO_INTERFERON_GAMMA_MEDIATED_SIGNALING_PATHWAY		20	0.156357	0.83854	0.653144	0.744772	1	1983	tags=100%, list=84%, signal=638%
GO_MONOVALENT_INORGANIC_CATION_TRANSPORT	GO_MONOVALENT_INORGANIC_CATION_TRANSPORT		52	0.0974605	0.837376	0.66474	0.745564	1	1175	tags=60%, list=50%, signal=117%
GO_REGULATION_OF_ERK1_AND_ERK2_CASCADE	GO_REGULATION_OF_ERK1_AND_ERK2_CASCADE		61	0.0899955	0.834734	0.650103	0.748779	1	640	tags=36%, list=27%, signal=48%
GO_REGULATION_OF_CANONICAL_WNT_SIGNALING_PATHWAY	GO_REGULATION_OF_CANONICAL_WNT_SIGNALING_PATHWAY		17	0.167638	0.833633	0.657025	0.749452	1	1680	tags=88%, list=72%, signal=308%
GO_PROTEIN_MODIFICATION_BY_SMALL_PROTEIN_CONJUGATION_OR_REMOVAL	GO_PROTEIN_MODIFICATION_BY_SMALL_PROTEIN_CONJUGATION_OR_REMOVAL		61	0.0915653	0.832099	0.662745	0.750839	1	213	tags=18%, list=9%, signal=19%
GO_NEGATIVE_REGULATION_OF_CELL_CYCLE_G1_S_PHASE_TRANSITION	GO_NEGATIVE_REGULATION_OF_CELL_CYCLE_G1_S_PHASE_TRANSITION		17	0.17049	0.829442	0.656118	0.75403	1	1259	tags=71%, list=54%, signal=151%
GO_ORGANIC_ANION_TRANSPORT	GO_ORGANIC_ANION_TRANSPORT		65	0.0892618	0.828811	0.689243	0.75391	1	1493	tags=72%, list=64%, signal=193%
GO_REGULATION_OF_PLASMA_LIPOPROTEIN_PARTICLE_LEVELS	GO_REGULATION_OF_PLASMA_LIPOPROTEIN_PARTICLE_LEVELS		16	0.171312	0.82609	0.662577	0.757324	1	1067	tags=63%, list=45%, signal=114%
GO_MONOCARBOXYLIC_ACID_TRANSPORT	GO_MONOCARBOXYLIC_ACID_TRANSPORT		24	0.139917	0.824852	0.692144	0.758108	1	1337	tags=71%, list=57%, signal=163%
GO_PROTEASOMAL_PROTEIN_CATABOLIC_PROCESS	GO_PROTEASOMAL_PROTEIN_CATABOLIC_PROCESS		22	0.148167	0.824777	0.67562	0.757173	1	188	tags=23%, list=8%, signal=24%
GO_ADAPTIVE_IMMUNE_RESPONSE_BASED_ON_SOMATIC_RECOMBINATION_OF_IMMUNE_RECEPTORS_BUILT_FROM_IMMUNOGLOBULIN_SUPERFAMILY_DOMAINS	GO_ADAPTIVE_IMMUNE_RESPONSE_BASED_ON_SOMATIC_RECOMBINATION_OF_IMMUNE_RECEPTORS_BUILT_FROM_IMMUNOGLOBULIN_SUPERFAMILY_DOMAINS		36	0.114091	0.822301	0.6917	0.760101	1	844	tags=47%, list=36%, signal=73%
GO_POSITIVE_REGULATION_OF_APOPTOTIC_SIGNALING_PATHWAY	GO_POSITIVE_REGULATION_OF_APOPTOTIC_SIGNALING_PATHWAY		22	0.146056	0.818392	0.686424	0.765283	1	940	tags=55%, list=40%, signal=90%
GO_REGULATION_OF_CARBOHYDRATE_BIOSYNTHETIC_PROCESS	GO_REGULATION_OF_CARBOHYDRATE_BIOSYNTHETIC_PROCESS		15	0.175254	0.810852	0.694	0.776094	1	1312	tags=73%, list=56%, signal=165%
GO_LIPOPROTEIN_METABOLIC_PROCESS	GO_LIPOPROTEIN_METABOLIC_PROCESS		17	0.161632	0.809642	0.678643	0.776807	1	1694	tags=88%, list=72%, signal=314%
GO_REGULATION_OF_FAT_CELL_DIFFERENTIATION	GO_REGULATION_OF_FAT_CELL_DIFFERENTIATION		18	0.163615	0.806417	0.705765	0.780702	1	1444	tags=78%, list=61%, signal=200%
GO_CELLULAR_RESPONSE_TO_INTERFERON_GAMMA	GO_CELLULAR_RESPONSE_TO_INTERFERON_GAMMA		25	0.137925	0.803851	0.709278	0.783514	1	1557	tags=80%, list=66%, signal=235%
GO_REGULATION_OF_SYMBIOSIS_ENCOMPASSING_MUTUALISM_THROUGH_PARASITISM	GO_REGULATION_OF_SYMBIOSIS_ENCOMPASSING_MUTUALISM_THROUGH_PARASITISM		21	0.145681	0.801471	0.673729	0.786246	1	2008	tags=100%, list=86%, signal=684%
GO_POSITIVE_REGULATION_OF_CELL_CYCLE_ARREST	GO_POSITIVE_REGULATION_OF_CELL_CYCLE_ARREST		16	0.172063	0.801049	0.705645	0.785754	1	1212	tags=69%, list=52%, signal=141%
GO_REGULATION_OF_MITOCHONDRION_ORGANIZATION	GO_REGULATION_OF_MITOCHONDRION_ORGANIZATION		27	0.129797	0.796777	0.708249	0.791273	1	1437	tags=74%, list=61%, signal=189%
GO_CELLULAR_RESPONSE_TO_INORGANIC_SUBSTANCE	GO_CELLULAR_RESPONSE_TO_INORGANIC_SUBSTANCE		24	0.137694	0.794323	0.732039	0.793978	1	1440	tags=75%, list=61%, signal=192%
GO_PEPTIDYL_LYSINE_MODIFICATION	GO_PEPTIDYL_LYSINE_MODIFICATION		17	0.162086	0.792307	0.719262	0.795785	1	588	tags=41%, list=25%, signal=55%
GO_PROTEIN_UBIQUITINATION	GO_PROTEIN_UBIQUITINATION		48	0.098587	0.792229	0.716243	0.794762	1	1680	tags=81%, list=72%, signal=280%
GO_NEGATIVE_REGULATION_OF_TRANSFERASE_ACTIVITY	GO_NEGATIVE_REGULATION_OF_TRANSFERASE_ACTIVITY		50	0.0963098	0.791173	0.748414	0.795259	1	576	tags=34%, list=25%, signal=44%
GO_CENTRAL_NERVOUS_SYSTEM_NEURON_DIFFERENTIATION	GO_CENTRAL_NERVOUS_SYSTEM_NEURON_DIFFERENTIATION		17	0.163146	0.789473	0.732484	0.796777	1	1138	tags=65%, list=48%, signal=125%
GO_TISSUE_REMODELING	GO_TISSUE_REMODELING		24	0.13712	0.787055	0.733981	0.799227	1	1050	tags=58%, list=45%, signal=104%
GO_ORGAN_MORPHOGENESIS	GO_ORGAN_MORPHOGENESIS		123	0.0626217	0.786368	0.722008	0.799171	1	1425	tags=67%, list=61%, signal=161%
GO_CELLULAR_RESPONSE_TO_ORGANIC_CYCLIC_COMPOUND	GO_CELLULAR_RESPONSE_TO_ORGANIC_CYCLIC_COMPOUND		75	0.0783927	0.786199	0.772727	0.798356	1	1167	tags=57%, list=50%, signal=110%
GO_NEGATIVE_REGULATION_OF_BINDING	GO_NEGATIVE_REGULATION_OF_BINDING		24	0.137694	0.786046	0.760479	0.797459	1	1440	tags=75%, list=61%, signal=192%
GO_I_KAPPAB_KINASE_NF_KAPPAB_SIGNALING	GO_I_KAPPAB_KINASE_NF_KAPPAB_SIGNALING		18	0.153362	0.784682	0.740883	0.798456	1	1207	tags=67%, list=51%, signal=136%
GO_POSITIVE_REGULATION_OF_PROTEIN_CATABOLIC_PROCESS	GO_POSITIVE_REGULATION_OF_PROTEIN_CATABOLIC_PROCESS		23	0.137541	0.784215	0.751938	0.798101	1	598	tags=39%, list=25%, signal=52%
GO_PLACENTA_DEVELOPMENT	GO_PLACENTA_DEVELOPMENT		16	0.162093	0.784083	0.725646	0.797188	1	1382	tags=75%, list=59%, signal=181%
GO_REGULATION_OF_ACUTE_INFLAMMATORY_RESPONSE	GO_REGULATION_OF_ACUTE_INFLAMMATORY_RESPONSE		23	0.138083	0.782482	0.730315	0.798518	1	903	tags=52%, list=38%, signal=84%
GO_POSITIVE_REGULATION_OF_GENE_EXPRESSION	GO_POSITIVE_REGULATION_OF_GENE_EXPRESSION		221	0.0466062	0.780612	0.745968	0.800177	1	2131	tags=95%, list=91%, signal=931%
GO_POSITIVE_REGULATION_OF_BIOSYNTHETIC_PROCESS	GO_POSITIVE_REGULATION_OF_BIOSYNTHETIC_PROCESS		238	0.0463141	0.780513	0.726916	0.799181	1	1756	tags=79%, list=75%, signal=282%
GO_RESPONSE_TO_KETONE	GO_RESPONSE_TO_KETONE		35	0.107628	0.763443	0.762781	0.823355	1	488	tags=31%, list=21%, signal=39%
GO_REGULATION_OF_GROWTH	GO_REGULATION_OF_GROWTH		108	0.0646495	0.759622	0.750499	0.827973	1	1463	tags=69%, list=62%, signal=173%
GO_CELL_CYCLE_ARREST	GO_CELL_CYCLE_ARREST		19	0.143387	0.756839	0.749499	0.830863	1	1148	tags=63%, list=49%, signal=123%
GO_PHOSPHOLIPID_BIOSYNTHETIC_PROCESS	GO_PHOSPHOLIPID_BIOSYNTHETIC_PROCESS		33	0.10913	0.756386	0.774704	0.830313	1	1454	tags=73%, list=62%, signal=188%
GO_ANATOMICAL_STRUCTURE_HOMEOSTASIS	GO_ANATOMICAL_STRUCTURE_HOMEOSTASIS		36	0.107266	0.755125	0.785714	0.830994	1	2099	tags=100%, list=89%, signal=929%
GO_POSITIVE_REGULATION_OF_CELL_PROJECTION_ORGANIZATION	GO_POSITIVE_REGULATION_OF_CELL_PROJECTION_ORGANIZATION		50	0.090792	0.751353	0.787097	0.835336	1	1387	tags=68%, list=59%, signal=163%
GO_BONE_DEVELOPMENT	GO_BONE_DEVELOPMENT		27	0.122249	0.74867	0.79089	0.838167	1	324	tags=26%, list=14%, signal=30%
GO_SIGNAL_TRANSDUCTION_IN_RESPONSE_TO_DNA_DAMAGE	GO_SIGNAL_TRANSDUCTION_IN_RESPONSE_TO_DNA_DAMAGE		17	0.151639	0.748177	0.785141	0.837728	1	198	tags=24%, list=8%, signal=26%
GO_REGULATION_OF_CELLULAR_RESPONSE_TO_TRANSFORMING_GROWTH_FACTOR_BETA_STIMULUS	GO_REGULATION_OF_CELLULAR_RESPONSE_TO_TRANSFORMING_GROWTH_FACTOR_BETA_STIMULUS		19	0.140878	0.744998	0.756871	0.841011	1	1401	tags=74%, list=60%, signal=181%
GO_ACTIVATION_OF_CYSTEINE_TYPE_ENDOPEPTIDASE_ACTIVITY	GO_ACTIVATION_OF_CYSTEINE_TYPE_ENDOPEPTIDASE_ACTIVITY		16	0.157483	0.744152	0.749522	0.841029	1	1246	tags=69%, list=53%, signal=145%
GO_REGULATION_OF_PROTEIN_CATABOLIC_PROCESS	GO_REGULATION_OF_PROTEIN_CATABOLIC_PROCESS		39	0.100665	0.742243	0.793372	0.842682	1	188	tags=18%, list=8%, signal=19%
GO_ACUTE_INFLAMMATORY_RESPONSE	GO_ACUTE_INFLAMMATORY_RESPONSE		17	0.152093	0.740633	0.76701	0.843657	1	1440	tags=76%, list=61%, signal=196%
GO_ARTERY_DEVELOPMENT	GO_ARTERY_DEVELOPMENT		17	0.148838	0.738936	0.808853	0.844921	1	757	tags=47%, list=32%, signal=69%
GO_POSITIVE_REGULATION_OF_HORMONE_SECRETION	GO_POSITIVE_REGULATION_OF_HORMONE_SECRETION		17	0.152093	0.738648	0.799189	0.844181	1	1440	tags=76%, list=61%, signal=196%
GO_ANTERIOR_POSTERIOR_PATTERN_SPECIFICATION	GO_ANTERIOR_POSTERIOR_PATTERN_SPECIFICATION		16	0.153195	0.730492	0.839583	0.853988	1	1256	tags=69%, list=53%, signal=147%
GO_TRANSMEMBRANE_RECEPTOR_PROTEIN_SERINE_THREONINE_KINASE_SIGNALING_PATHWAY	GO_TRANSMEMBRANE_RECEPTOR_PROTEIN_SERINE_THREONINE_KINASE_SIGNALING_PATHWAY		31	0.112451	0.72995	0.785992	0.853587	1	1632	tags=81%, list=70%, signal=261%
GO_REGULATION_OF_DEVELOPMENTAL_GROWTH	GO_REGULATION_OF_DEVELOPMENTAL_GROWTH		54	0.0855533	0.723651	0.816568	0.860826	1	368	tags=24%, list=16%, signal=28%
GO_NEGATIVE_REGULATION_OF_CELL_CYCLE	GO_NEGATIVE_REGULATION_OF_CELL_CYCLE		55	0.0807755	0.706157	0.825607	0.882474	1	198	tags=16%, list=8%, signal=17%
GO_TRANSFORMING_GROWTH_FACTOR_BETA_RECEPTOR_SIGNALING_PATHWAY	GO_TRANSFORMING_GROWTH_FACTOR_BETA_RECEPTOR_SIGNALING_PATHWAY		17	0.141469	0.704648	0.824242	0.883158	1	1741	tags=88%, list=74%, signal=339%
GO_REGULATION_OF_TYPE_I_INTERFERON_PRODUCTION	GO_REGULATION_OF_TYPE_I_INTERFERON_PRODUCTION		22	0.124248	0.700918	0.844991	0.88678	1	2058	tags=100%, list=88%, signal=802%
GO_RESPONSE_TO_TRANSFORMING_GROWTH_FACTOR_BETA	GO_RESPONSE_TO_TRANSFORMING_GROWTH_FACTOR_BETA		28	0.111453	0.700888	0.833656	0.885615	1	1166	tags=61%, list=50%, signal=119%
GO_ORGANELLE_DISASSEMBLY	GO_ORGANELLE_DISASSEMBLY		23	0.119065	0.699145	0.815631	0.88667	1	1866	tags=91%, list=79%, signal=440%
GO_NEGATIVE_REGULATION_OF_CELL_GROWTH	GO_NEGATIVE_REGULATION_OF_CELL_GROWTH		33	0.102049	0.69609	0.861789	0.889255	1	1755	tags=85%, list=75%, signal=331%
GO_REGULATION_OF_CELL_CYCLE_G1_S_PHASE_TRANSITION	GO_REGULATION_OF_CELL_CYCLE_G1_S_PHASE_TRANSITION		23	0.123422	0.691918	0.856581	0.893102	1	835	tags=48%, list=36%, signal=73%
GO_DETOXIFICATION	GO_DETOXIFICATION		18	0.135098	0.687422	0.87247	0.897334	1	1380	tags=72%, list=59%, signal=174%
GO_POSITIVE_REGULATION_OF_PHOSPHATIDYLINOSITOL_3_KINASE_SIGNALING	GO_POSITIVE_REGULATION_OF_PHOSPHATIDYLINOSITOL_3_KINASE_SIGNALING		17	0.137936	0.687215	0.880753	0.89639	1	1473	tags=76%, list=63%, signal=204%
GO_RESPONSE_TO_STARVATION	GO_RESPONSE_TO_STARVATION		33	0.103148	0.685528	0.869739	0.897232	1	1539	tags=76%, list=66%, signal=217%
GO_RESPONSE_TO_CORTICOSTEROID	GO_RESPONSE_TO_CORTICOSTEROID		32	0.10244	0.680487	0.856299	0.901848	1	1376	tags=69%, list=59%, signal=164%
GO_CELLULAR_RESPONSE_TO_STRESS	GO_CELLULAR_RESPONSE_TO_STRESS		198	0.0437162	0.678233	0.848368	0.903281	1	2170	tags=96%, list=92%, signal=1165%
GO_REGULATION_OF_DEFENSE_RESPONSE_TO_VIRUS_BY_HOST	GO_REGULATION_OF_DEFENSE_RESPONSE_TO_VIRUS_BY_HOST		16	0.141617	0.677548	0.875	0.902903	1	1870	tags=94%, list=80%, signal=457%
GO_NEGATIVE_REGULATION_OF_PROTEIN_SERINE_THREONINE_KINASE_ACTIVITY	GO_NEGATIVE_REGULATION_OF_PROTEIN_SERINE_THREONINE_KINASE_ACTIVITY		29	0.107656	0.675917	0.863014	0.903569	1	559	tags=34%, list=24%, signal=45%
GO_REGULATION_OF_PROTEIN_STABILITY	GO_REGULATION_OF_PROTEIN_STABILITY		26	0.110846	0.674724	0.87619	0.903709	1	735	tags=42%, list=31%, signal=61%
GO_REGULATION_OF_SMOOTH_MUSCLE_CELL_MIGRATION	GO_REGULATION_OF_SMOOTH_MUSCLE_CELL_MIGRATION		16	0.141081	0.665462	0.875	0.912788	1	1431	tags=75%, list=61%, signal=191%
GO_LOCOMOTORY_BEHAVIOR	GO_LOCOMOTORY_BEHAVIOR		16	0.138508	0.663145	0.880808	0.913969	1	1437	tags=75%, list=61%, signal=192%
GO_PROTEIN_CATABOLIC_PROCESS	GO_PROTEIN_CATABOLIC_PROCESS		49	0.078792	0.657849	0.898406	0.918336	1	1495	tags=71%, list=64%, signal=193%
GO_ORGANIC_ACID_TRANSPORT	GO_ORGANIC_ACID_TRANSPORT		49	0.0796619	0.656588	0.897683	0.918489	1	1493	tags=71%, list=64%, signal=192%
GO_POSITIVE_REGULATION_OF_TRANSMEMBRANE_RECEPTOR_PROTEIN_SERINE_THREONINE_KINASE_SIGNALING_PATHWAY	GO_POSITIVE_REGULATION_OF_TRANSMEMBRANE_RECEPTOR_PROTEIN_SERINE_THREONINE_KINASE_SIGNALING_PATHWAY		18	0.125894	0.651327	0.870968	0.922697	1	97	tags=17%, list=4%, signal=17%
GO_POSITIVE_REGULATION_OF_PROTEOLYSIS	GO_POSITIVE_REGULATION_OF_PROTEOLYSIS		44	0.0829782	0.647925	0.896624	0.924774	1	715	tags=39%, list=30%, signal=55%
GO_REGULATION_OF_TRANSMEMBRANE_RECEPTOR_PROTEIN_SERINE_THREONINE_KINASE_SIGNALING_PATHWAY	GO_REGULATION_OF_TRANSMEMBRANE_RECEPTOR_PROTEIN_SERINE_THREONINE_KINASE_SIGNALING_PATHWAY		37	0.0904137	0.641708	0.893971	0.929567	1	1440	tags=70%, list=61%, signal=179%
GO_INTRINSIC_APOPTOTIC_SIGNALING_PATHWAY	GO_INTRINSIC_APOPTOTIC_SIGNALING_PATHWAY		24	0.109509	0.63339	0.928854	0.936107	1	1212	tags=63%, list=52%, signal=128%
GO_NEPHRON_DEVELOPMENT	GO_NEPHRON_DEVELOPMENT		17	0.128852	0.633143	0.913725	0.935106	1	113	tags=18%, list=5%, signal=18%
GO_REGULATION_OF_CELL_CYCLE_ARREST	GO_REGULATION_OF_CELL_CYCLE_ARREST		20	0.116237	0.625492	0.924453	0.940634	1	198	tags=20%, list=8%, signal=22%
GO_CELLULAR_RESPONSE_TO_PEPTIDE	GO_CELLULAR_RESPONSE_TO_PEPTIDE		45	0.0806292	0.625195	0.927386	0.939689	1	1483	tags=71%, list=63%, signal=189%
GO_NUCLEOSIDE_DIPHOSPHATE_METABOLIC_PROCESS	GO_NUCLEOSIDE_DIPHOSPHATE_METABOLIC_PROCESS		18	0.118741	0.613371	0.915521	0.948598	1	1679	tags=83%, list=72%, signal=290%
GO_RESPONSE_TO_EXTRACELLULAR_STIMULUS	GO_RESPONSE_TO_EXTRACELLULAR_STIMULUS		84	0.0566633	0.602908	0.942197	0.955598	1	1464	tags=68%, list=62%, signal=174%
GO_NEGATIVE_REGULATION_OF_CELLULAR_PROTEIN_LOCALIZATION	GO_NEGATIVE_REGULATION_OF_CELLULAR_PROTEIN_LOCALIZATION		17	0.118858	0.594464	0.943137	0.960313	1	965	tags=53%, list=41%, signal=89%
GO_NEGATIVE_REGULATION_OF_GROWTH	GO_NEGATIVE_REGULATION_OF_GROWTH		45	0.0758045	0.593689	0.942553	0.959616	1	1755	tags=82%, list=75%, signal=319%
GO_REGULATION_OF_RESPONSE_TO_DNA_DAMAGE_STIMULUS	GO_REGULATION_OF_RESPONSE_TO_DNA_DAMAGE_STIMULUS		15	0.125075	0.58748	0.960474	0.962755	1	1116	tags=60%, list=48%, signal=114%
GO_CYTOSOLIC_TRANSPORT	GO_CYTOSOLIC_TRANSPORT		16	0.117603	0.574421	0.961014	0.969639	1	752	tags=44%, list=32%, signal=64%
GO_RESPONSE_TO_ACID_CHEMICAL	GO_RESPONSE_TO_ACID_CHEMICAL		71	0.0577421	0.571165	0.974609	0.970271	1	562	tags=30%, list=24%, signal=38%
GO_RESPONSE_TO_TOPOLOGICALLY_INCORRECT_PROTEIN	GO_RESPONSE_TO_TOPOLOGICALLY_INCORRECT_PROTEIN		18	0.11011	0.563643	0.968872	0.973226	1	786	tags=44%, list=33%, signal=66%
GO_RESPONSE_TO_GROWTH_FACTOR	GO_RESPONSE_TO_GROWTH_FACTOR		81	0.0548449	0.551147	0.964844	0.978578	1	1440	tags=67%, list=61%, signal=166%
GO_MACROMITOPHAGY	GO_MACROMITOPHAGY		17	0.10942	0.54344	0.980892	0.980827	1	987	tags=53%, list=42%, signal=91%
GO_POSITIVE_REGULATION_OF_NUCLEOCYTOPLASMIC_TRANSPORT	GO_POSITIVE_REGULATION_OF_NUCLEOCYTOPLASMIC_TRANSPORT		21	0.0986351	0.541151	0.971717	0.980549	1	1223	tags=62%, list=52%, signal=128%
GO_PEPTIDYL_TYROSINE_MODIFICATION	GO_PEPTIDYL_TYROSINE_MODIFICATION		38	0.0708134	0.520416	0.981891	0.987168	1	1133	tags=55%, list=48%, signal=105%
GO_FOREBRAIN_DEVELOPMENT	GO_FOREBRAIN_DEVELOPMENT		44	0.060685	0.484032	0.995652	0.994932	1	1300	tags=61%, list=55%, signal=135%
GO_ORGANIC_ACID_TRANSMEMBRANE_TRANSPORT	GO_ORGANIC_ACID_TRANSMEMBRANE_TRANSPORT		21	0.0878098	0.482802	0.993927	0.993875	1	1360	tags=67%, list=58%, signal=157%
GO_GLYCEROLIPID_BIOSYNTHETIC_PROCESS	GO_GLYCEROLIPID_BIOSYNTHETIC_PROCESS		34	0.0602217	0.410952	1	0.999228	1	1448	tags=68%, list=62%, signal=174%

## Sheet: WT vs DKO liver down GO
NAME	GS<br> follow link to MSigDB	GS DETAILS	SIZE	ES	NES	NOM p-val	FDR q-val	FWER p-val	RANK AT MAX	LEADING EDGE
GO_RNA_PROCESSING	GO_RNA_PROCESSING	Details ...	66	-0.491913	-4.57655	0	0	0	1013	tags=91%, list=43%, signal=155%
GO_NCRNA_METABOLIC_PROCESS	GO_NCRNA_METABOLIC_PROCESS	Details ...	37	-0.565357	-4.01764	0	0	0	979	tags=97%, list=42%, signal=164%
GO_RIBONUCLEOPROTEIN_COMPLEX_BIOGENESIS	GO_RIBONUCLEOPROTEIN_COMPLEX_BIOGENESIS	Details ...	31	-0.580283	-3.8599	0	0	0	853	tags=94%, list=36%, signal=145%
GO_NCRNA_PROCESSING	GO_NCRNA_PROCESSING	Details ...	27	-0.590263	-3.60618	0	0	0	979	tags=100%, list=42%, signal=170%
GO_MRNA_METABOLIC_PROCESS	GO_MRNA_METABOLIC_PROCESS	Details ...	40	-0.45169	-3.40603	0	0	0	1013	tags=88%, list=43%, signal=151%
GO_RIBOSOME_BIOGENESIS	GO_RIBOSOME_BIOGENESIS	Details ...	21	-0.594839	-3.30738	0	0	0	853	tags=95%, list=36%, signal=148%
GO_RRNA_METABOLIC_PROCESS	GO_RRNA_METABOLIC_PROCESS	Details ...	17	-0.641785	-3.18527	0	0	0	853	tags=100%, list=36%, signal=156%
GO_CELLULAR_AMIDE_METABOLIC_PROCESS	GO_CELLULAR_AMIDE_METABOLIC_PROCESS	Details ...	75	-0.315518	-3.16233	0	0	0	1037	tags=75%, list=44%, signal=129%
GO_RNA_SPLICING_VIA_TRANSESTERIFICATION_REACTIONS	GO_RNA_SPLICING_VIA_TRANSESTERIFICATION_REACTIONS	Details ...	22	-0.553545	-3.0986	0	0	0	848	tags=91%, list=36%, signal=141%
GO_PEPTIDE_METABOLIC_PROCESS	GO_PEPTIDE_METABOLIC_PROCESS	Details ...	47	-0.374786	-3.00479	0	0	0	1037	tags=81%, list=44%, signal=142%
GO_RNA_SPLICING	GO_RNA_SPLICING	Details ...	32	-0.442034	-2.94055	0	5.29e-05	0.001	885	tags=81%, list=38%, signal=129%
GO_ENERGY_DERIVATION_BY_OXIDATION_OF_ORGANIC_COMPOUNDS	GO_ENERGY_DERIVATION_BY_OXIDATION_OF_ORGANIC_COMPOUNDS	Details ...	23	-0.522468	-2.92858	0	4.85e-05	0.001	828	tags=87%, list=35%, signal=133%
GO_MRNA_PROCESSING	GO_MRNA_PROCESSING	Details ...	32	-0.422442	-2.88381	0	8.94e-05	0.002	857	tags=78%, list=36%, signal=121%
GO_CELLULAR_AMINO_ACID_CATABOLIC_PROCESS	GO_CELLULAR_AMINO_ACID_CATABOLIC_PROCESS	Details ...	19	-0.529095	-2.75292	0	0.000245	0.006	746	tags=84%, list=32%, signal=122%
GO_ALPHA_AMINO_ACID_CATABOLIC_PROCESS	GO_ALPHA_AMINO_ACID_CATABOLIC_PROCESS	Details ...	16	-0.56325	-2.71295	0	0.000499	0.013	742	tags=88%, list=32%, signal=127%
GO_ORGANONITROGEN_COMPOUND_METABOLIC_PROCESS	GO_ORGANONITROGEN_COMPOUND_METABOLIC_PROCESS	Details ...	241	-0.154998	-2.654	0	0.00094	0.026	1243	tags=67%, list=53%, signal=127%
GO_ORGANIC_ACID_METABOLIC_PROCESS	GO_ORGANIC_ACID_METABOLIC_PROCESS	Details ...	168	-0.172805	-2.52327	0	0.00274865	0.075	1553	tags=82%, list=66%, signal=225%
GO_AMIDE_BIOSYNTHETIC_PROCESS	GO_AMIDE_BIOSYNTHETIC_PROCESS	Details ...	34	-0.358508	-2.46744	0	0.00403168	0.115	1036	tags=79%, list=44%, signal=140%
GO_CELLULAR_MODIFIED_AMINO_ACID_METABOLIC_PROCESS	GO_CELLULAR_MODIFIED_AMINO_ACID_METABOLIC_PROCESS	Details ...	46	-0.29736	-2.43403	0.00375234	0.00475883	0.14	1103	tags=76%, list=47%, signal=141%
GO_SMALL_MOLECULE_METABOLIC_PROCESS	GO_SMALL_MOLECULE_METABOLIC_PROCESS	Details ...	276	-0.134051	-2.42921	0.00199203	0.00469274	0.146	1195	tags=63%, list=51%, signal=113%
GO_CELLULAR_AMINO_ACID_METABOLIC_PROCESS	GO_CELLULAR_AMINO_ACID_METABOLIC_PROCESS		49	-0.280397	-2.37378	0.00214592	0.00677989	0.212	746	tags=59%, list=32%, signal=85%
GO_ORGANIC_CYCLIC_COMPOUND_CATABOLIC_PROCESS	GO_ORGANIC_CYCLIC_COMPOUND_CATABOLIC_PROCESS		46	-0.290806	-2.34086	0	0.00841672	0.268	1016	tags=72%, list=43%, signal=124%
GO_GENERATION_OF_PRECURSOR_METABOLITES_AND_ENERGY	GO_GENERATION_OF_PRECURSOR_METABOLITES_AND_ENERGY		36	-0.319348	-2.27511	0.00203252	0.0124132	0.384	828	tags=67%, list=35%, signal=101%
GO_NUCLEIC_ACID_PHOSPHODIESTER_BOND_HYDROLYSIS	GO_NUCLEIC_ACID_PHOSPHODIESTER_BOND_HYDROLYSIS		18	-0.427992	-2.14214	0.0020284	0.0293363	0.713	830	tags=78%, list=35%, signal=119%
GO_SULFUR_COMPOUND_METABOLIC_PROCESS	GO_SULFUR_COMPOUND_METABOLIC_PROCESS		69	-0.22176	-2.14003	0.00408163	0.0285748	0.718	1129	tags=70%, list=48%, signal=130%
GO_ORGANIC_ACID_CATABOLIC_PROCESS	GO_ORGANIC_ACID_CATABOLIC_PROCESS		35	-0.306121	-2.11868	0.00192308	0.031255	0.768	903	tags=69%, list=38%, signal=110%
GO_RESPONSE_TO_CARBOHYDRATE	GO_RESPONSE_TO_CARBOHYDRATE		40	-0.282626	-2.10106	0.00952381	0.0334037	0.811	464	tags=48%, list=20%, signal=58%
GO_COENZYME_METABOLIC_PROCESS	GO_COENZYME_METABOLIC_PROCESS		49	-0.247703	-2.04614	0.00395257	0.045805	0.899	917	tags=63%, list=39%, signal=102%
GO_LIPID_HOMEOSTASIS	GO_LIPID_HOMEOSTASIS		26	-0.332836	-2.01617	0.00420168	0.0526003	0.924	944	tags=73%, list=40%, signal=121%
GO_ORGANONITROGEN_COMPOUND_BIOSYNTHETIC_PROCESS	GO_ORGANONITROGEN_COMPOUND_BIOSYNTHETIC_PROCESS		119	-0.161881	-2.00339	0.00617284	0.0547983	0.935	1120	tags=63%, list=48%, signal=114%
GO_ALPHA_AMINO_ACID_METABOLIC_PROCESS	GO_ALPHA_AMINO_ACID_METABOLIC_PROCESS		40	-0.263908	-1.95816	0.00209644	0.0696067	0.969	742	tags=58%, list=32%, signal=83%
GO_COFACTOR_METABOLIC_PROCESS	GO_COFACTOR_METABOLIC_PROCESS		56	-0.222326	-1.90095	0.00793651	0.0924214	0.993	917	tags=61%, list=39%, signal=97%
GO_COENZYME_BIOSYNTHETIC_PROCESS	GO_COENZYME_BIOSYNTHETIC_PROCESS		21	-0.343422	-1.8916	0.00826446	0.0951452	0.994	879	tags=71%, list=37%, signal=113%
GO_COFACTOR_BIOSYNTHETIC_PROCESS	GO_COFACTOR_BIOSYNTHETIC_PROCESS		23	-0.324899	-1.87569	0.00403226	0.100959	0.994	879	tags=70%, list=37%, signal=110%
GO_SINGLE_ORGANISM_BIOSYNTHETIC_PROCESS	GO_SINGLE_ORGANISM_BIOSYNTHETIC_PROCESS		194	-0.11446	-1.79871	0.0113208	0.148324	1	1110	tags=58%, list=47%, signal=100%
GO_RNA_LOCALIZATION	GO_RNA_LOCALIZATION		18	-0.356509	-1.78872	0.0189036	0.1522	1	1127	tags=83%, list=48%, signal=159%
GO_SMALL_MOLECULE_CATABOLIC_PROCESS	GO_SMALL_MOLECULE_CATABOLIC_PROCESS		57	-0.199637	-1.75498	0.0136986	0.176698	1	903	tags=58%, list=38%, signal=92%
GO_STEROID_METABOLIC_PROCESS	GO_STEROID_METABOLIC_PROCESS		45	-0.227221	-1.75404	0.0174419	0.172901	1	1617	tags=91%, list=69%, signal=287%
GO_NUCLEOBASE_CONTAINING_SMALL_MOLECULE_METABOLIC_PROCESS	GO_NUCLEOBASE_CONTAINING_SMALL_MOLECULE_METABOLIC_PROCESS		70	-0.17716	-1.7457	0.0213592	0.176369	1	1610	tags=86%, list=69%, signal=265%
GO_VESICLE_ORGANIZATION	GO_VESICLE_ORGANIZATION		19	-0.333981	-1.7372	0.0308008	0.18	1	1324	tags=89%, list=56%, signal=204%
GO_THIOESTER_METABOLIC_PROCESS	GO_THIOESTER_METABOLIC_PROCESS		18	-0.334669	-1.72917	0.018	0.182968	1	917	tags=72%, list=39%, signal=118%
GO_REGULATION_OF_FATTY_ACID_METABOLIC_PROCESS	GO_REGULATION_OF_FATTY_ACID_METABOLIC_PROCESS		16	-0.359455	-1.72288	0.0264766	0.184613	1	777	tags=69%, list=33%, signal=102%
GO_HEPATICOBILIARY_SYSTEM_DEVELOPMENT	GO_HEPATICOBILIARY_SYSTEM_DEVELOPMENT		23	-0.299093	-1.70268	0.0163265	0.199447	1	939	tags=70%, list=40%, signal=115%
GO_AMINE_METABOLIC_PROCESS	GO_AMINE_METABOLIC_PROCESS		29	-0.264457	-1.69357	0.0290698	0.204176	1	1088	tags=72%, list=46%, signal=133%
GO_TRANSCRIPTION_INITIATION_FROM_RNA_POLYMERASE_II_PROMOTER	GO_TRANSCRIPTION_INITIATION_FROM_RNA_POLYMERASE_II_PROMOTER		16	-0.350665	-1.69081	0.0271967	0.202592	1	1091	tags=81%, list=46%, signal=151%
GO_PROTEIN_ACTIVATION_CASCADE	GO_PROTEIN_ACTIVATION_CASCADE		18	-0.341345	-1.68675	0.0365854	0.202464	1	771	tags=67%, list=33%, signal=98%
GO_LIPID_METABOLIC_PROCESS	GO_LIPID_METABOLIC_PROCESS		198	-0.108875	-1.67702	0.0380762	0.207997	1	1605	tags=78%, list=68%, signal=227%
GO_CELLULAR_CATABOLIC_PROCESS	GO_CELLULAR_CATABOLIC_PROCESS		152	-0.121045	-1.67391	0.028169	0.206995	1	1110	tags=59%, list=47%, signal=104%
GO_MONOCARBOXYLIC_ACID_METABOLIC_PROCESS	GO_MONOCARBOXYLIC_ACID_METABOLIC_PROCESS		102	-0.139176	-1.66234	0.0255319	0.214727	1	1553	tags=79%, list=66%, signal=224%
GO_METHYLATION	GO_METHYLATION		23	-0.294287	-1.65258	0.042	0.220946	1	746	tags=61%, list=32%, signal=88%
GO_RESPONSE_TO_XENOBIOTIC_STIMULUS	GO_RESPONSE_TO_XENOBIOTIC_STIMULUS		20	-0.309192	-1.63918	0.0341151	0.230999	1	1277	tags=85%, list=54%, signal=185%
GO_ESTABLISHMENT_OF_PROTEIN_LOCALIZATION_TO_ORGANELLE	GO_ESTABLISHMENT_OF_PROTEIN_LOCALIZATION_TO_ORGANELLE		30	-0.247627	-1.63827	0.0331263	0.227528	1	1775	tags=100%, list=76%, signal=405%
GO_ORGANOPHOSPHATE_METABOLIC_PROCESS	GO_ORGANOPHOSPHATE_METABOLIC_PROCESS		132	-0.129308	-1.62773	0.0428016	0.234732	1	1262	tags=66%, list=54%, signal=134%
GO_WATER_SOLUBLE_VITAMIN_METABOLIC_PROCESS	GO_WATER_SOLUBLE_VITAMIN_METABOLIC_PROCESS		18	-0.317501	-1.62533	0.0454545	0.232966	1	957	tags=72%, list=41%, signal=121%
GO_OXIDOREDUCTION_COENZYME_METABOLIC_PROCESS	GO_OXIDOREDUCTION_COENZYME_METABOLIC_PROCESS		20	-0.294759	-1.61979	0.0361905	0.234908	1	1428	tags=90%, list=61%, signal=228%
GO_CARBOHYDRATE_BIOSYNTHETIC_PROCESS	GO_CARBOHYDRATE_BIOSYNTHETIC_PROCESS		18	-0.317597	-1.61538	0.0498008	0.235343	1	435	tags=50%, list=19%, signal=61%
GO_STEROID_BIOSYNTHETIC_PROCESS	GO_STEROID_BIOSYNTHETIC_PROCESS		18	-0.318646	-1.60723	0.0386179	0.240404	1	563	tags=56%, list=24%, signal=73%
GO_POSTTRANSCRIPTIONAL_REGULATION_OF_GENE_EXPRESSION	GO_POSTTRANSCRIPTIONAL_REGULATION_OF_GENE_EXPRESSION		43	-0.209433	-1.60626	0.0316832	0.237333	1	1211	tags=72%, list=52%, signal=146%
GO_MITOCHONDRION_ORGANIZATION	GO_MITOCHONDRION_ORGANIZATION		55	-0.184078	-1.60409	0.0408602	0.235941	1	1500	tags=82%, list=64%, signal=221%
GO_STRIATED_MUSCLE_CELL_DIFFERENTIATION	GO_STRIATED_MUSCLE_CELL_DIFFERENTIATION		19	-0.309688	-1.58291	0.0449679	0.256371	1	1257	tags=84%, list=54%, signal=180%
GO_NEGATIVE_REGULATION_OF_NITROGEN_COMPOUND_METABOLIC_PROCESS	GO_NEGATIVE_REGULATION_OF_NITROGEN_COMPOUND_METABOLIC_PROCESS		168	-0.10403	-1.54393	0.0654397	0.302109	1	1661	tags=80%, list=71%, signal=255%
GO_STEROL_HOMEOSTASIS	GO_STEROL_HOMEOSTASIS		17	-0.306483	-1.54383	0.0594059	0.297374	1	944	tags=71%, list=40%, signal=117%
GO_ORGANONITROGEN_COMPOUND_CATABOLIC_PROCESS	GO_ORGANONITROGEN_COMPOUND_CATABOLIC_PROCESS		56	-0.174863	-1.54206	0.0578842	0.295109	1	1487	tags=80%, list=63%, signal=214%
GO_GLUTAMINE_FAMILY_AMINO_ACID_METABOLIC_PROCESS	GO_GLUTAMINE_FAMILY_AMINO_ACID_METABOLIC_PROCESS		15	-0.323961	-1.53653	0.0588235	0.297652	1	654	tags=60%, list=28%, signal=83%
GO_REGULATION_OF_SODIUM_ION_TRANSPORT	GO_REGULATION_OF_SODIUM_ION_TRANSPORT		17	-0.308022	-1.53406	0.0467836	0.296104	1	1631	tags=100%, list=69%, signal=325%
GO_GLAND_DEVELOPMENT	GO_GLAND_DEVELOPMENT		65	-0.167122	-1.52757	0.0410678	0.299741	1	1245	tags=69%, list=53%, signal=143%
GO_HORMONE_METABOLIC_PROCESS	GO_HORMONE_METABOLIC_PROCESS		21	-0.282481	-1.52394	0.0685484	0.300333	1	909	tags=67%, list=39%, signal=108%
GO_DIGESTIVE_SYSTEM_DEVELOPMENT	GO_DIGESTIVE_SYSTEM_DEVELOPMENT		21	-0.281519	-1.50893	0.0729783	0.315966	1	464	tags=48%, list=20%, signal=59%
GO_DNA_TEMPLATED_TRANSCRIPTION_INITIATION	GO_DNA_TEMPLATED_TRANSCRIPTION_INITIATION		20	-0.28823	-1.50395	0.0704762	0.318045	1	1091	tags=75%, list=46%, signal=139%
GO_DICARBOXYLIC_ACID_METABOLIC_PROCESS	GO_DICARBOXYLIC_ACID_METABOLIC_PROCESS		23	-0.257373	-1.49488	0.0724947	0.326405	1	1036	tags=70%, list=44%, signal=123%
GO_AMINOGLYCAN_BIOSYNTHETIC_PROCESS	GO_AMINOGLYCAN_BIOSYNTHETIC_PROCESS		22	-0.268076	-1.49331	0.0726915	0.324185	1	1512	tags=91%, list=64%, signal=253%
GO_CARBOHYDRATE_DERIVATIVE_BIOSYNTHETIC_PROCESS	GO_CARBOHYDRATE_DERIVATIVE_BIOSYNTHETIC_PROCESS		74	-0.148185	-1.48761	0.0681363	0.328014	1	1663	tags=85%, list=71%, signal=283%
GO_CARBOHYDRATE_DERIVATIVE_METABOLIC_PROCESS	GO_CARBOHYDRATE_DERIVATIVE_METABOLIC_PROCESS		144	-0.108779	-1.48095	0.0582329	0.332888	1	1669	tags=81%, list=71%, signal=264%
GO_REGULATION_OF_AUTOPHAGY	GO_REGULATION_OF_AUTOPHAGY		26	-0.241834	-1.47344	0.0800781	0.338994	1	1065	tags=69%, list=45%, signal=125%
GO_REGULATION_OF_CELLULAR_KETONE_METABOLIC_PROCESS	GO_REGULATION_OF_CELLULAR_KETONE_METABOLIC_PROCESS		22	-0.262878	-1.44419	0.0918367	0.379199	1	777	tags=59%, list=33%, signal=87%
GO_PURINE_CONTAINING_COMPOUND_METABOLIC_PROCESS	GO_PURINE_CONTAINING_COMPOUND_METABOLIC_PROCESS		62	-0.157607	-1.44223	0.100616	0.377359	1	1610	tags=84%, list=69%, signal=260%
GO_MONOSACCHARIDE_METABOLIC_PROCESS	GO_MONOSACCHARIDE_METABOLIC_PROCESS		34	-0.213178	-1.4329	0.085595	0.387311	1	1027	tags=65%, list=44%, signal=113%
GO_MONOCARBOXYLIC_ACID_CATABOLIC_PROCESS	GO_MONOCARBOXYLIC_ACID_CATABOLIC_PROCESS		15	-0.299586	-1.43146	0.102249	0.384828	1	1337	tags=87%, list=57%, signal=200%
GO_NEUTRAL_LIPID_METABOLIC_PROCESS	GO_NEUTRAL_LIPID_METABOLIC_PROCESS		20	-0.266838	-1.41803	0.102362	0.401672	1	319	tags=40%, list=14%, signal=46%
GO_REGULATION_OF_CELLULAR_AMIDE_METABOLIC_PROCESS	GO_REGULATION_OF_CELLULAR_AMIDE_METABOLIC_PROCESS		35	-0.200556	-1.41411	0.11022	0.402951	1	1013	tags=63%, list=43%, signal=109%
GO_NUCLEAR_TRANSPORT	GO_NUCLEAR_TRANSPORT		38	-0.194987	-1.40677	0.109589	0.410202	1	1775	tags=95%, list=76%, signal=382%
GO_POSITIVE_REGULATION_OF_LIPID_BIOSYNTHETIC_PROCESS	GO_POSITIVE_REGULATION_OF_LIPID_BIOSYNTHETIC_PROCESS		16	-0.292131	-1.40165	0.117769	0.41374	1	347	tags=44%, list=15%, signal=51%
GO_TRANSCRIPTION_FROM_RNA_POLYMERASE_II_PROMOTER	GO_TRANSCRIPTION_FROM_RNA_POLYMERASE_II_PROMOTER		70	-0.143785	-1.39616	0.108108	0.41786	1	881	tags=51%, list=38%, signal=80%
GO_DEVELOPMENTAL_GROWTH	GO_DEVELOPMENTAL_GROWTH		52	-0.164634	-1.38847	0.105058	0.426372	1	1384	tags=75%, list=59%, signal=179%
GO_VITAMIN_METABOLIC_PROCESS	GO_VITAMIN_METABOLIC_PROCESS		23	-0.243142	-1.38122	0.128964	0.433846	1	967	tags=65%, list=41%, signal=110%
GO_PROTEIN_LOCALIZATION_TO_NUCLEUS	GO_PROTEIN_LOCALIZATION_TO_NUCLEUS		23	-0.23942	-1.38114	0.119433	0.428947	1	1384	tags=83%, list=59%, signal=199%
GO_RESPIRATORY_SYSTEM_DEVELOPMENT	GO_RESPIRATORY_SYSTEM_DEVELOPMENT		34	-0.197036	-1.37765	0.11245	0.430013	1	650	tags=47%, list=28%, signal=64%
GO_MUSCLE_TISSUE_DEVELOPMENT	GO_MUSCLE_TISSUE_DEVELOPMENT		36	-0.194108	-1.37576	0.124731	0.428825	1	1248	tags=72%, list=53%, signal=152%
GO_POSITIVE_REGULATION_OF_ENDOTHELIAL_CELL_PROLIFERATION	GO_POSITIVE_REGULATION_OF_ENDOTHELIAL_CELL_PROLIFERATION		16	-0.287521	-1.37327	0.107486	0.428203	1	1385	tags=88%, list=59%, signal=212%
GO_STEROL_METABOLIC_PROCESS	GO_STEROL_METABOLIC_PROCESS		25	-0.234249	-1.36981	0.141243	0.429261	1	1617	tags=92%, list=69%, signal=292%
GO_GLYCOSYL_COMPOUND_METABOLIC_PROCESS	GO_GLYCOSYL_COMPOUND_METABOLIC_PROCESS		47	-0.171415	-1.36941	0.131115	0.425209	1	1455	tags=79%, list=62%, signal=203%
GO_MUSCLE_STRUCTURE_DEVELOPMENT	GO_MUSCLE_STRUCTURE_DEVELOPMENT		55	-0.159727	-1.36346	0.126214	0.430687	1	1257	tags=69%, list=54%, signal=145%
GO_NEGATIVE_REGULATION_OF_TRANSCRIPTION_FROM_RNA_POLYMERASE_II_PROMOTER	GO_NEGATIVE_REGULATION_OF_TRANSCRIPTION_FROM_RNA_POLYMERASE_II_PROMOTER		93	-0.120087	-1.35092	0.132039	0.447732	1	1649	tags=82%, list=70%, signal=264%
GO_POSITIVE_REGULATION_OF_LIPID_METABOLIC_PROCESS	GO_POSITIVE_REGULATION_OF_LIPID_METABOLIC_PROCESS		28	-0.212315	-1.34888	0.129741	0.446584	1	347	tags=36%, list=15%, signal=41%
GO_ISOPRENOID_METABOLIC_PROCESS	GO_ISOPRENOID_METABOLIC_PROCESS		21	-0.240039	-1.34089	0.129159	0.456126	1	1455	tags=86%, list=62%, signal=223%
GO_REGULATION_OF_LIPASE_ACTIVITY	GO_REGULATION_OF_LIPASE_ACTIVITY		18	-0.250501	-1.33369	0.129707	0.464214	1	1374	tags=83%, list=59%, signal=199%
GO_CARBOHYDRATE_METABOLIC_PROCESS	GO_CARBOHYDRATE_METABOLIC_PROCESS		89	-0.121049	-1.32957	0.1417	0.467126	1	1416	tags=72%, list=60%, signal=174%
GO_OXIDATION_REDUCTION_PROCESS	GO_OXIDATION_REDUCTION_PROCESS		144	-0.0979028	-1.32553	0.160784	0.469461	1	1481	tags=72%, list=63%, signal=184%
GO_MUSCLE_ORGAN_DEVELOPMENT	GO_MUSCLE_ORGAN_DEVELOPMENT		30	-0.204861	-1.32441	0.148225	0.466659	1	1248	tags=73%, list=53%, signal=155%
GO_POSITIVE_REGULATION_OF_EPITHELIAL_CELL_PROLIFERATION	GO_POSITIVE_REGULATION_OF_EPITHELIAL_CELL_PROLIFERATION		31	-0.194398	-1.30533	0.146341	0.497385	1	308	tags=32%, list=13%, signal=37%
GO_GLYCOPROTEIN_METABOLIC_PROCESS	GO_GLYCOPROTEIN_METABOLIC_PROCESS		44	-0.170494	-1.30416	0.14898	0.494489	1	1636	tags=86%, list=70%, signal=279%
GO_REGULATION_OF_ORGAN_MORPHOGENESIS	GO_REGULATION_OF_ORGAN_MORPHOGENESIS		22	-0.23122	-1.30047	0.161736	0.496625	1	1491	tags=86%, list=64%, signal=234%
GO_SMALL_MOLECULE_BIOSYNTHETIC_PROCESS	GO_SMALL_MOLECULE_BIOSYNTHETIC_PROCESS		89	-0.118577	-1.29174	0.169072	0.508337	1	1105	tags=58%, list=47%, signal=106%
GO_INTRACELLULAR_PROTEIN_TRANSPORT	GO_INTRACELLULAR_PROTEIN_TRANSPORT		64	-0.138874	-1.29147	0.159774	0.504015	1	1775	tags=89%, list=76%, signal=355%
GO_MONOCARBOXYLIC_ACID_BIOSYNTHETIC_PROCESS	GO_MONOCARBOXYLIC_ACID_BIOSYNTHETIC_PROCESS		41	-0.171271	-1.28595	0.177551	0.509754	1	1553	tags=83%, list=66%, signal=241%
GO_REGULATION_OF_MULTICELLULAR_ORGANISM_GROWTH	GO_REGULATION_OF_MULTICELLULAR_ORGANISM_GROWTH		15	-0.272325	-1.28369	0.156977	0.509264	1	931	tags=67%, list=40%, signal=110%
GO_PROTEIN_IMPORT	GO_PROTEIN_IMPORT		19	-0.246458	-1.27973	0.194726	0.511751	1	1775	tags=100%, list=76%, signal=406%
GO_REGULATION_OF_DENDRITE_MORPHOGENESIS	GO_REGULATION_OF_DENDRITE_MORPHOGENESIS		16	-0.257933	-1.2745	0.201663	0.517131	1	1454	tags=88%, list=62%, signal=228%
GO_REGULATION_OF_RESPONSE_TO_EXTRACELLULAR_STIMULUS	GO_REGULATION_OF_RESPONSE_TO_EXTRACELLULAR_STIMULUS		16	-0.263401	-1.26143	0.205714	0.537814	1	1001	tags=69%, list=43%, signal=119%
GO_LIPID_CATABOLIC_PROCESS	GO_LIPID_CATABOLIC_PROCESS		47	-0.157083	-1.26092	0.164969	0.534074	1	289	tags=28%, list=12%, signal=31%
GO_INTRACELLULAR_RECEPTOR_SIGNALING_PATHWAY	GO_INTRACELLULAR_RECEPTOR_SIGNALING_PATHWAY		19	-0.241712	-1.26072	0.191532	0.529621	1	921	tags=63%, list=39%, signal=103%
GO_CIRCADIAN_RHYTHM	GO_CIRCADIAN_RHYTHM		23	-0.226255	-1.26015	0.194672	0.525853	1	700	tags=52%, list=30%, signal=74%
GO_REGULATION_OF_EPITHELIAL_CELL_DIFFERENTIATION	GO_REGULATION_OF_EPITHELIAL_CELL_DIFFERENTIATION		17	-0.258107	-1.25771	0.205029	0.525638	1	1333	tags=82%, list=57%, signal=189%
GO_REGULATION_OF_GLUCOSE_METABOLIC_PROCESS	GO_REGULATION_OF_GLUCOSE_METABOLIC_PROCESS		19	-0.239068	-1.25388	0.19619	0.52834	1	680	tags=53%, list=29%, signal=73%
GO_LIPID_PHOSPHORYLATION	GO_LIPID_PHOSPHORYLATION		18	-0.243586	-1.2391	0.211297	0.552599	1	1651	tags=94%, list=70%, signal=316%
GO_ORGANOPHOSPHATE_BIOSYNTHETIC_PROCESS	GO_ORGANOPHOSPHATE_BIOSYNTHETIC_PROCESS		60	-0.13715	-1.23749	0.198397	0.551006	1	1096	tags=60%, list=47%, signal=110%
GO_CELLULAR_LIPID_CATABOLIC_PROCESS	GO_CELLULAR_LIPID_CATABOLIC_PROCESS		33	-0.182944	-1.23611	0.193548	0.548883	1	289	tags=30%, list=12%, signal=34%
GO_POSITIVE_REGULATION_OF_TRANSCRIPTION_FROM_RNA_POLYMERASE_II_PROMOTER	GO_POSITIVE_REGULATION_OF_TRANSCRIPTION_FROM_RNA_POLYMERASE_II_PROMOTER		126	-0.0952524	-1.22561	0.198077	0.565479	1	1951	tags=92%, list=83%, signal=515%
GO_REGULATION_OF_ENDOTHELIAL_CELL_PROLIFERATION	GO_REGULATION_OF_ENDOTHELIAL_CELL_PROLIFERATION		21	-0.222072	-1.22409	0.215164	0.56381	1	1385	tags=81%, list=59%, signal=196%
GO_LIPID_LOCALIZATION	GO_LIPID_LOCALIZATION		49	-0.148716	-1.22313	0.213675	0.561201	1	1480	tags=78%, list=63%, signal=205%
GO_CELLULAR_RESPONSE_TO_CARBOHYDRATE_STIMULUS	GO_CELLULAR_RESPONSE_TO_CARBOHYDRATE_STIMULUS		20	-0.228608	-1.21698	0.222836	0.56937	1	408	tags=40%, list=17%, signal=48%
GO_REGULATION_OF_CATABOLIC_PROCESS	GO_REGULATION_OF_CATABOLIC_PROCESS		86	-0.113133	-1.21597	0.209205	0.566731	1	1001	tags=53%, list=43%, signal=90%
GO_GROWTH	GO_GROWTH		69	-0.124362	-1.2132	0.22549	0.567897	1	1385	tags=71%, list=59%, signal=168%
GO_REGULATION_OF_LIPID_METABOLIC_PROCESS	GO_REGULATION_OF_LIPID_METABOLIC_PROCESS		53	-0.138792	-1.20913	0.200401	0.571568	1	347	tags=28%, list=15%, signal=32%
GO_WNT_SIGNALING_PATHWAY	GO_WNT_SIGNALING_PATHWAY		32	-0.18302	-1.20598	0.226824	0.573324	1	1705	tags=91%, list=73%, signal=326%
GO_CARDIAC_MUSCLE_TISSUE_DEVELOPMENT	GO_CARDIAC_MUSCLE_TISSUE_DEVELOPMENT		22	-0.215548	-1.19684	0.228632	0.587913	1	1314	tags=77%, list=56%, signal=174%
GO_ESTABLISHMENT_OF_PROTEIN_LOCALIZATION_TO_MEMBRANE	GO_ESTABLISHMENT_OF_PROTEIN_LOCALIZATION_TO_MEMBRANE		30	-0.183003	-1.19492	0.240246	0.58724	1	1690	tags=90%, list=72%, signal=317%
GO_HEART_MORPHOGENESIS	GO_HEART_MORPHOGENESIS		29	-0.182005	-1.18551	0.271429	0.601882	1	1765	tags=93%, list=75%, signal=370%
GO_REGULATION_OF_HUMORAL_IMMUNE_RESPONSE	GO_REGULATION_OF_HUMORAL_IMMUNE_RESPONSE		15	-0.253465	-1.18217	0.241107	0.60404	1	975	tags=67%, list=42%, signal=113%
GO_REGULATION_OF_LIPID_BIOSYNTHETIC_PROCESS	GO_REGULATION_OF_LIPID_BIOSYNTHETIC_PROCESS		27	-0.189398	-1.17466	0.250988	0.615162	1	518	tags=41%, list=22%, signal=52%
GO_CHROMATIN_MODIFICATION	GO_CHROMATIN_MODIFICATION		42	-0.150436	-1.17366	0.253411	0.612547	1	884	tags=52%, list=38%, signal=83%
GO_CARBOHYDRATE_HOMEOSTASIS	GO_CARBOHYDRATE_HOMEOSTASIS		32	-0.172766	-1.17332	0.24477	0.608558	1	408	tags=34%, list=17%, signal=41%
GO_EMBRYONIC_ORGAN_DEVELOPMENT	GO_EMBRYONIC_ORGAN_DEVELOPMENT		49	-0.141685	-1.17199	0.247191	0.606662	1	1592	tags=82%, list=68%, signal=248%
GO_MACROMOLECULE_CATABOLIC_PROCESS	GO_MACROMOLECULE_CATABOLIC_PROCESS		82	-0.108755	-1.17098	0.248532	0.604218	1	1129	tags=59%, list=48%, signal=109%
GO_NUCLEOBASE_CONTAINING_COMPOUND_TRANSPORT	GO_NUCLEOBASE_CONTAINING_COMPOUND_TRANSPORT		17	-0.237565	-1.1707	0.249501	0.600355	1	1519	tags=88%, list=65%, signal=248%
GO_REGULATION_OF_HEART_CONTRACTION	GO_REGULATION_OF_HEART_CONTRACTION		31	-0.175881	-1.16936	0.264	0.598618	1	1790	tags=94%, list=76%, signal=388%
GO_MAMMARY_GLAND_DEVELOPMENT	GO_MAMMARY_GLAND_DEVELOPMENT		24	-0.20274	-1.16336	0.270661	0.606768	1	1780	tags=96%, list=76%, signal=392%
GO_SENSORY_PERCEPTION_OF_MECHANICAL_STIMULUS	GO_SENSORY_PERCEPTION_OF_MECHANICAL_STIMULUS		15	-0.24895	-1.15942	0.267223	0.610366	1	829	tags=60%, list=35%, signal=92%
GO_CELLULAR_MACROMOLECULAR_COMPLEX_ASSEMBLY	GO_CELLULAR_MACROMOLECULAR_COMPLEX_ASSEMBLY		67	-0.120751	-1.1549	0.274262	0.615178	1	847	tags=48%, list=36%, signal=73%
GO_RESPONSE_TO_FIBROBLAST_GROWTH_FACTOR	GO_RESPONSE_TO_FIBROBLAST_GROWTH_FACTOR		20	-0.216409	-1.15417	0.282474	0.612368	1	319	tags=35%, list=14%, signal=40%
GO_EPIDERMIS_DEVELOPMENT	GO_EPIDERMIS_DEVELOPMENT		32	-0.174169	-1.15114	0.282	0.614391	1	258	tags=28%, list=11%, signal=31%
GO_MYELOID_CELL_DIFFERENTIATION	GO_MYELOID_CELL_DIFFERENTIATION		46	-0.138537	-1.13823	0.267347	0.636878	1	1928	tags=96%, list=82%, signal=524%
GO_ORGANIC_ACID_BIOSYNTHETIC_PROCESS	GO_ORGANIC_ACID_BIOSYNTHETIC_PROCESS		58	-0.127978	-1.13812	0.26506	0.632682	1	720	tags=43%, list=31%, signal=61%
GO_IN_UTERO_EMBRYONIC_DEVELOPMENT	GO_IN_UTERO_EMBRYONIC_DEVELOPMENT		33	-0.167406	-1.13532	0.300613	0.634072	1	1748	tags=91%, list=74%, signal=351%
GO_MULTICELLULAR_ORGANISMAL_HOMEOSTASIS	GO_MULTICELLULAR_ORGANISMAL_HOMEOSTASIS		46	-0.141994	-1.13281	0.298137	0.634985	1	1869	tags=93%, list=80%, signal=449%
GO_SENSORY_PERCEPTION	GO_SENSORY_PERCEPTION		44	-0.144058	-1.1249	0.293388	0.647097	1	683	tags=43%, list=29%, signal=60%
GO_CARBOHYDRATE_TRANSPORT	GO_CARBOHYDRATE_TRANSPORT		18	-0.220267	-1.1211	0.298419	0.650716	1	140	tags=28%, list=6%, signal=29%
GO_CELLULAR_RESPONSE_TO_INSULIN_STIMULUS	GO_CELLULAR_RESPONSE_TO_INSULIN_STIMULUS		26	-0.186444	-1.11975	0.307843	0.649302	1	1013	tags=62%, list=43%, signal=107%
GO_FAT_CELL_DIFFERENTIATION	GO_FAT_CELL_DIFFERENTIATION		22	-0.201126	-1.11747	0.3125	0.649582	1	387	tags=36%, list=16%, signal=43%
GO_NUCLEOSIDE_PHOSPHATE_BIOSYNTHETIC_PROCESS	GO_NUCLEOSIDE_PHOSPHATE_BIOSYNTHETIC_PROCESS		23	-0.193287	-1.11574	0.281573	0.648815	1	1185	tags=70%, list=50%, signal=139%
GO_CONNECTIVE_TISSUE_DEVELOPMENT	GO_CONNECTIVE_TISSUE_DEVELOPMENT		35	-0.161201	-1.11225	0.313725	0.651865	1	299	tags=29%, list=13%, signal=32%
GO_EMBRYONIC_MORPHOGENESIS	GO_EMBRYONIC_MORPHOGENESIS		63	-0.11746	-1.11156	0.290456	0.64907	1	478	tags=32%, list=20%, signal=39%
GO_FATTY_ACID_METABOLIC_PROCESS	GO_FATTY_ACID_METABOLIC_PROCESS		57	-0.130304	-1.11077	0.317647	0.646541	1	1309	tags=68%, list=56%, signal=151%
GO_GLUCOSE_METABOLIC_PROCESS	GO_GLUCOSE_METABOLIC_PROCESS		23	-0.193604	-1.09767	0.343137	0.670169	1	878	tags=57%, list=37%, signal=89%
GO_CARDIAC_CHAMBER_DEVELOPMENT	GO_CARDIAC_CHAMBER_DEVELOPMENT		20	-0.20043	-1.08694	0.337945	0.688689	1	1765	tags=95%, list=75%, signal=379%
GO_NOTCH_SIGNALING_PATHWAY	GO_NOTCH_SIGNALING_PATHWAY		16	-0.225021	-1.08586	0.340726	0.686715	1	1384	tags=81%, list=59%, signal=197%
GO_REGULATION_OF_ORGANELLE_ASSEMBLY	GO_REGULATION_OF_ORGANELLE_ASSEMBLY		18	-0.209728	-1.08218	0.32449	0.69006	1	1469	tags=83%, list=63%, signal=221%
GO_REPRODUCTIVE_SYSTEM_DEVELOPMENT	GO_REPRODUCTIVE_SYSTEM_DEVELOPMENT		49	-0.127509	-1.07648	0.361266	0.698158	1	1385	tags=71%, list=59%, signal=171%
GO_NUCLEAR_IMPORT	GO_NUCLEAR_IMPORT		19	-0.202097	-1.06923	0.376164	0.709381	1	1384	tags=79%, list=59%, signal=191%
GO_FORMATION_OF_PRIMARY_GERM_LAYER	GO_FORMATION_OF_PRIMARY_GERM_LAYER		20	-0.19854	-1.05943	0.370019	0.726027	1	478	tags=40%, list=20%, signal=50%
GO_TUBE_MORPHOGENESIS	GO_TUBE_MORPHOGENESIS		52	-0.125302	-1.05809	0.367171	0.724475	1	1384	tags=71%, list=59%, signal=169%
GO_EMBRYONIC_ORGAN_MORPHOGENESIS	GO_EMBRYONIC_ORGAN_MORPHOGENESIS		34	-0.15199	-1.05382	0.363095	0.729212	1	478	tags=35%, list=20%, signal=44%
GO_CELL_FATE_COMMITMENT	GO_CELL_FATE_COMMITMENT		22	-0.186821	-1.04807	0.396414	0.737483	1	527	tags=41%, list=22%, signal=52%
GO_FC_EPSILON_RECEPTOR_SIGNALING_PATHWAY	GO_FC_EPSILON_RECEPTOR_SIGNALING_PATHWAY		16	-0.215266	-1.04612	0.397706	0.737232	1	1847	tags=100%, list=79%, signal=465%
GO_MUSCLE_CONTRACTION	GO_MUSCLE_CONTRACTION		33	-0.156476	-1.04563	0.373225	0.733881	1	1631	tags=85%, list=69%, signal=274%
GO_POSITIVE_REGULATION_OF_CATABOLIC_PROCESS	GO_POSITIVE_REGULATION_OF_CATABOLIC_PROCESS		43	-0.134712	-1.03609	0.390533	0.750558	1	1001	tags=56%, list=43%, signal=96%
GO_PROTEIN_HOMOOLIGOMERIZATION	GO_PROTEIN_HOMOOLIGOMERIZATION		34	-0.152296	-1.03512	0.410822	0.748193	1	1306	tags=71%, list=56%, signal=157%
GO_NEGATIVE_REGULATION_OF_GENE_EXPRESSION	GO_NEGATIVE_REGULATION_OF_GENE_EXPRESSION		175	-0.0696338	-1.032	0.384298	0.75057	1	1661	tags=77%, list=71%, signal=244%
GO_REGULATION_OF_DENDRITE_DEVELOPMENT	GO_REGULATION_OF_DENDRITE_DEVELOPMENT		22	-0.187368	-1.02854	0.396414	0.753654	1	1593	tags=86%, list=68%, signal=266%
GO_CELLULAR_CARBOHYDRATE_METABOLIC_PROCESS	GO_CELLULAR_CARBOHYDRATE_METABOLIC_PROCESS		31	-0.157782	-1.02523	0.412393	0.756479	1	1226	tags=68%, list=52%, signal=140%
GO_TERPENOID_METABOLIC_PROCESS	GO_TERPENOID_METABOLIC_PROCESS		17	-0.205769	-1.02436	0.409836	0.753871	1	1455	tags=82%, list=62%, signal=215%
GO_DEPHOSPHORYLATION	GO_DEPHOSPHORYLATION		45	-0.130053	-1.02151	0.419422	0.755809	1	1319	tags=69%, list=56%, signal=154%
GO_PROTEIN_TARGETING	GO_PROTEIN_TARGETING		32	-0.152796	-1.01957	0.412351	0.755793	1	1775	tags=91%, list=76%, signal=366%
GO_ORGANIC_HYDROXY_COMPOUND_METABOLIC_PROCESS	GO_ORGANIC_HYDROXY_COMPOUND_METABOLIC_PROCESS		83	-0.0969813	-1.01725	0.432	0.756724	1	1705	tags=82%, list=73%, signal=289%
GO_RESPONSE_TO_INSULIN	GO_RESPONSE_TO_INSULIN		35	-0.142548	-1.01196	0.444444	0.763613	1	1013	tags=57%, list=43%, signal=99%
GO_REGULATION_OF_EPITHELIAL_CELL_PROLIFERATION	GO_REGULATION_OF_EPITHELIAL_CELL_PROLIFERATION		42	-0.131685	-1.00895	0.425573	0.766097	1	480	tags=33%, list=20%, signal=41%
GO_REGULATION_OF_PROTEIN_MODIFICATION_BY_SMALL_PROTEIN_CONJUGATION_OR_REMOVAL	GO_REGULATION_OF_PROTEIN_MODIFICATION_BY_SMALL_PROTEIN_CONJUGATION_OR_REMOVAL		27	-0.16176	-1.00682	0.406427	0.766679	1	930	tags=56%, list=40%, signal=91%
GO_REGULATION_OF_BINDING	GO_REGULATION_OF_BINDING		46	-0.127243	-1.00555	0.433884	0.765174	1	1954	tags=96%, list=83%, signal=559%
GO_ENDODERM_FORMATION	GO_ENDODERM_FORMATION		15	-0.212687	-1.00549	0.434077	0.761019	1	444	tags=40%, list=19%, signal=49%
GO_EPITHELIAL_CELL_PROLIFERATION	GO_EPITHELIAL_CELL_PROLIFERATION		19	-0.193306	-1.0054	0.43662	0.756976	1	663	tags=47%, list=28%, signal=65%
GO_CATABOLIC_PROCESS	GO_CATABOLIC_PROCESS		224	-0.0605747	-1.00189	0.448133	0.760291	1	1539	tags=71%, list=66%, signal=186%
GO_HEXOSE_METABOLIC_PROCESS	GO_HEXOSE_METABOLIC_PROCESS		29	-0.157931	-1.00141	0.431174	0.757073	1	1416	tags=76%, list=60%, signal=189%
GO_HOMEOSTASIS_OF_NUMBER_OF_CELLS	GO_HOMEOSTASIS_OF_NUMBER_OF_CELLS		40	-0.135875	-1.00138	0.436399	0.753005	1	1918	tags=95%, list=82%, signal=510%
GO_PROTEIN_FOLDING	GO_PROTEIN_FOLDING		23	-0.176868	-1.00038	0.416495	0.751087	1	1019	tags=61%, list=43%, signal=106%
GO_REGULATION_OF_TRANSCRIPTION_FROM_RNA_POLYMERASE_II_PROMOTER	GO_REGULATION_OF_TRANSCRIPTION_FROM_RNA_POLYMERASE_II_PROMOTER		205	-0.0625861	-0.997611	0.418972	0.753018	1	1814	tags=83%, list=77%, signal=333%
GO_STRIATED_MUSCLE_CONTRACTION	GO_STRIATED_MUSCLE_CONTRACTION		16	-0.212264	-0.995762	0.442688	0.752905	1	1854	tags=100%, list=79%, signal=472%
GO_RESPONSE_TO_ESTRADIOL	GO_RESPONSE_TO_ESTRADIOL		25	-0.165062	-0.987208	0.469349	0.767031	1	275	tags=28%, list=12%, signal=31%
GO_REGULATION_OF_PHOSPHATIDYLINOSITOL_3_KINASE_SIGNALING	GO_REGULATION_OF_PHOSPHATIDYLINOSITOL_3_KINASE_SIGNALING		29	-0.153574	-0.976689	0.445693	0.785325	1	1669	tags=86%, list=71%, signal=294%
GO_TUBE_DEVELOPMENT	GO_TUBE_DEVELOPMENT		84	-0.0928824	-0.96815	0.472617	0.80004	1	1384	tags=68%, list=59%, signal=159%
GO_REGULATION_OF_MAP_KINASE_ACTIVITY	GO_REGULATION_OF_MAP_KINASE_ACTIVITY		66	-0.103073	-0.967865	0.470825	0.796432	1	335	tags=24%, list=14%, signal=27%
GO_POSITIVE_REGULATION_OF_BINDING	GO_POSITIVE_REGULATION_OF_BINDING		18	-0.192179	-0.967021	0.489109	0.793904	1	1249	tags=72%, list=53%, signal=153%
GO_RESPONSE_TO_LIGHT_STIMULUS	GO_RESPONSE_TO_LIGHT_STIMULUS		30	-0.148979	-0.965353	0.460446	0.793258	1	1221	tags=67%, list=52%, signal=137%
GO_MORPHOGENESIS_OF_A_BRANCHING_STRUCTURE	GO_MORPHOGENESIS_OF_A_BRANCHING_STRUCTURE		27	-0.153494	-0.964323	0.471624	0.791366	1	1384	tags=74%, list=59%, signal=178%
GO_PATTERN_SPECIFICATION_PROCESS	GO_PATTERN_SPECIFICATION_PROCESS		37	-0.133451	-0.962986	0.47619	0.790046	1	1406	tags=73%, list=60%, signal=179%
GO_CELLULAR_LIPID_METABOLIC_PROCESS	GO_CELLULAR_LIPID_METABOLIC_PROCESS		150	-0.0689354	-0.959334	0.471933	0.793708	1	1587	tags=74%, list=68%, signal=214%
GO_CELLULAR_COMPONENT_ASSEMBLY_INVOLVED_IN_MORPHOGENESIS	GO_CELLULAR_COMPONENT_ASSEMBLY_INVOLVED_IN_MORPHOGENESIS		20	-0.179725	-0.95932	0.476	0.789706	1	287	tags=30%, list=12%, signal=34%
GO_RESPONSE_TO_RETINOIC_ACID	GO_RESPONSE_TO_RETINOIC_ACID		18	-0.188269	-0.95845	0.464355	0.787656	1	345	tags=33%, list=15%, signal=39%
GO_PROTEIN_DEPHOSPHORYLATION	GO_PROTEIN_DEPHOSPHORYLATION		28	-0.154803	-0.956764	0.500975	0.787397	1	1319	tags=71%, list=56%, signal=161%
GO_BRANCHING_MORPHOGENESIS_OF_AN_EPITHELIAL_TUBE	GO_BRANCHING_MORPHOGENESIS_OF_AN_EPITHELIAL_TUBE		24	-0.162651	-0.955797	0.502119	0.785555	1	1384	tags=75%, list=59%, signal=181%
GO_RESPONSE_TO_PEPTIDE	GO_RESPONSE_TO_PEPTIDE		68	-0.0993808	-0.953769	0.486815	0.785794	1	1639	tags=79%, list=70%, signal=255%
GO_EYE_DEVELOPMENT	GO_EYE_DEVELOPMENT		45	-0.117537	-0.947993	0.482422	0.794031	1	1400	tags=71%, list=60%, signal=173%
GO_REGULATION_OF_GENE_EXPRESSION_EPIGENETIC	GO_REGULATION_OF_GENE_EXPRESSION_EPIGENETIC		19	-0.182098	-0.947423	0.50566	0.791358	1	1307	tags=74%, list=56%, signal=165%
GO_CELL_GROWTH	GO_CELL_GROWTH		26	-0.156629	-0.946013	0.501946	0.790266	1	1895	tags=96%, list=81%, signal=493%
GO_ETHANOLAMINE_CONTAINING_COMPOUND_METABOLIC_PROCESS	GO_ETHANOLAMINE_CONTAINING_COMPOUND_METABOLIC_PROCESS		15	-0.205029	-0.945432	0.512146	0.787707	1	1088	tags=67%, list=46%, signal=123%
GO_REGULATION_OF_HORMONE_LEVELS	GO_REGULATION_OF_HORMONE_LEVELS		65	-0.0996125	-0.944886	0.494071	0.784974	1	1363	tags=68%, list=58%, signal=157%
GO_UROGENITAL_SYSTEM_DEVELOPMENT	GO_UROGENITAL_SYSTEM_DEVELOPMENT		50	-0.112968	-0.943078	0.506876	0.78494	1	1385	tags=70%, list=59%, signal=167%
GO_TRANSMEMBRANE_TRANSPORT	GO_TRANSMEMBRANE_TRANSPORT		141	-0.0696559	-0.941691	0.500945	0.784104	1	1729	tags=80%, list=74%, signal=286%
GO_MYELOID_CELL_HOMEOSTASIS	GO_MYELOID_CELL_HOMEOSTASIS		18	-0.184979	-0.94086	0.509434	0.782032	1	1918	tags=100%, list=82%, signal=542%
GO_EMBRYO_DEVELOPMENT	GO_EMBRYO_DEVELOPMENT		104	-0.080351	-0.938822	0.515873	0.782351	1	498	tags=29%, list=21%, signal=35%
GO_REGULATION_OF_PROTEIN_MATURATION	GO_REGULATION_OF_PROTEIN_MATURATION		20	-0.173883	-0.938446	0.51503	0.779429	1	418	tags=35%, list=18%, signal=42%
GO_ENDODERM_DEVELOPMENT	GO_ENDODERM_DEVELOPMENT		19	-0.181216	-0.935459	0.530146	0.781829	1	444	tags=37%, list=19%, signal=45%
GO_RHYTHMIC_PROCESS	GO_RHYTHMIC_PROCESS		46	-0.117894	-0.934415	0.523614	0.78029	1	1363	tags=70%, list=58%, signal=163%
GO_CELLULAR_RESPONSE_TO_OXYGEN_LEVELS	GO_CELLULAR_RESPONSE_TO_OXYGEN_LEVELS		24	-0.157559	-0.933375	0.521298	0.778689	1	1885	tags=96%, list=80%, signal=481%
GO_POSITIVE_REGULATION_OF_MYELOID_CELL_DIFFERENTIATION	GO_POSITIVE_REGULATION_OF_MYELOID_CELL_DIFFERENTIATION		16	-0.196827	-0.929563	0.524272	0.782717	1	1890	tags=100%, list=80%, signal=509%
GO_COVALENT_CHROMATIN_MODIFICATION	GO_COVALENT_CHROMATIN_MODIFICATION		28	-0.149446	-0.929527	0.533742	0.779157	1	996	tags=57%, list=42%, signal=98%
GO_PURINE_CONTAINING_COMPOUND_BIOSYNTHETIC_PROCESS	GO_PURINE_CONTAINING_COMPOUND_BIOSYNTHETIC_PROCESS		16	-0.191038	-0.924662	0.517312	0.785017	1	1610	tags=88%, list=69%, signal=276%
GO_PEPTIDYL_AMINO_ACID_MODIFICATION	GO_PEPTIDYL_AMINO_ACID_MODIFICATION		111	-0.0755597	-0.923535	0.562118	0.783667	1	1355	tags=65%, list=58%, signal=146%
GO_REGULATION_OF_ENDOTHELIAL_CELL_MIGRATION	GO_REGULATION_OF_ENDOTHELIAL_CELL_MIGRATION		28	-0.14686	-0.921536	0.52008	0.783896	1	1589	tags=82%, list=68%, signal=251%
GO_EPIDERMAL_CELL_DIFFERENTIATION	GO_EPIDERMAL_CELL_DIFFERENTIATION		16	-0.187178	-0.918545	0.523711	0.786178	1	1032	tags=63%, list=44%, signal=111%
GO_REGULATION_OF_CELL_PROJECTION_ASSEMBLY	GO_REGULATION_OF_CELL_PROJECTION_ASSEMBLY		18	-0.182308	-0.917034	0.545643	0.785674	1	1272	tags=72%, list=54%, signal=156%
GO_REGULATION_OF_BLOOD_VESSEL_ENDOTHELIAL_CELL_MIGRATION	GO_REGULATION_OF_BLOOD_VESSEL_ENDOTHELIAL_CELL_MIGRATION		15	-0.19157	-0.911947	0.548757	0.792148	1	1589	tags=87%, list=68%, signal=266%
GO_ERYTHROCYTE_HOMEOSTASIS	GO_ERYTHROCYTE_HOMEOSTASIS		16	-0.18482	-0.905825	0.546875	0.800676	1	1918	tags=100%, list=82%, signal=542%
GO_CELL_CELL_ADHESION_VIA_PLASMA_MEMBRANE_ADHESION_MOLECULES	GO_CELL_CELL_ADHESION_VIA_PLASMA_MEMBRANE_ADHESION_MOLECULES		19	-0.169397	-0.892172	0.580271	0.823837	1	1213	tags=68%, list=52%, signal=140%
GO_SKIN_DEVELOPMENT	GO_SKIN_DEVELOPMENT		33	-0.130545	-0.889758	0.601942	0.824946	1	268	tags=24%, list=11%, signal=27%
GO_APPENDAGE_DEVELOPMENT	GO_APPENDAGE_DEVELOPMENT		15	-0.187312	-0.885892	0.586956	0.828856	1	1912	tags=100%, list=81%, signal=535%
GO_TELENCEPHALON_DEVELOPMENT	GO_TELENCEPHALON_DEVELOPMENT		31	-0.132903	-0.883116	0.586956	0.830669	1	299	tags=26%, list=13%, signal=29%
GO_PROTEIN_LOCALIZATION_TO_ORGANELLE	GO_PROTEIN_LOCALIZATION_TO_ORGANELLE		50	-0.106736	-0.882196	0.597656	0.828901	1	1775	tags=86%, list=76%, signal=345%
GO_NEURAL_TUBE_DEVELOPMENT	GO_NEURAL_TUBE_DEVELOPMENT		18	-0.178588	-0.881545	0.59879	0.82647	1	498	tags=39%, list=21%, signal=49%
GO_REGULATION_OF_MUSCLE_CELL_DIFFERENTIATION	GO_REGULATION_OF_MUSCLE_CELL_DIFFERENTIATION		20	-0.161942	-0.878431	0.591376	0.82906	1	1385	tags=75%, list=59%, signal=181%
GO_REGULATION_OF_CARBOHYDRATE_METABOLIC_PROCESS	GO_REGULATION_OF_CARBOHYDRATE_METABOLIC_PROCESS		28	-0.141071	-0.876816	0.619802	0.828553	1	680	tags=43%, list=29%, signal=60%
GO_POSITIVE_REGULATION_OF_NEURON_PROJECTION_DEVELOPMENT	GO_POSITIVE_REGULATION_OF_NEURON_PROJECTION_DEVELOPMENT		41	-0.116306	-0.874455	0.607214	0.829656	1	1508	tags=76%, list=64%, signal=208%
GO_REGULATION_OF_PROTEIN_BINDING	GO_REGULATION_OF_PROTEIN_BINDING		32	-0.131477	-0.874031	0.599251	0.826921	1	1751	tags=88%, list=75%, signal=339%
GO_ORGANIC_HYDROXY_COMPOUND_BIOSYNTHETIC_PROCESS	GO_ORGANIC_HYDROXY_COMPOUND_BIOSYNTHETIC_PROCESS		32	-0.131477	-0.871526	0.587174	0.828207	1	1164	tags=63%, list=50%, signal=122%
GO_ORGANOPHOSPHATE_ESTER_TRANSPORT	GO_ORGANOPHOSPHATE_ESTER_TRANSPORT		19	-0.162776	-0.870513	0.62768	0.826645	1	1352	tags=74%, list=58%, signal=172%
GO_NEGATIVE_REGULATION_OF_MAP_KINASE_ACTIVITY	GO_NEGATIVE_REGULATION_OF_MAP_KINASE_ACTIVITY		18	-0.17134	-0.869556	0.588477	0.824997	1	254	tags=28%, list=11%, signal=31%
GO_CELLULAR_MACROMOLECULE_LOCALIZATION	GO_CELLULAR_MACROMOLECULE_LOCALIZATION		118	-0.0700159	-0.869402	0.621242	0.821777	1	1775	tags=82%, list=76%, signal=320%
GO_REGIONALIZATION	GO_REGIONALIZATION		24	-0.152037	-0.867658	0.616183	0.821742	1	1213	tags=67%, list=52%, signal=137%
GO_POSITIVE_REGULATION_OF_EPITHELIAL_CELL_MIGRATION	GO_POSITIVE_REGULATION_OF_EPITHELIAL_CELL_MIGRATION		17	-0.176546	-0.863494	0.607214	0.826164	1	1385	tags=76%, list=59%, signal=185%
GO_HORMONE_MEDIATED_SIGNALING_PATHWAY	GO_HORMONE_MEDIATED_SIGNALING_PATHWAY		19	-0.163386	-0.862172	0.628846	0.825202	1	1227	tags=68%, list=52%, signal=142%
GO_INOSITOL_LIPID_MEDIATED_SIGNALING	GO_INOSITOL_LIPID_MEDIATED_SIGNALING		22	-0.150082	-0.854067	0.626223	0.837288	1	399	tags=32%, list=17%, signal=38%
GO_GLYCOSYLATION	GO_GLYCOSYLATION		29	-0.13289	-0.849014	0.638507	0.843253	1	1636	tags=83%, list=70%, signal=270%
GO_REGULATION_OF_LIPID_TRANSPORT	GO_REGULATION_OF_LIPID_TRANSPORT		16	-0.175708	-0.842411	0.666667	0.851964	1	325	tags=31%, list=14%, signal=36%
GO_ORGANOPHOSPHATE_CATABOLIC_PROCESS	GO_ORGANOPHOSPHATE_CATABOLIC_PROCESS		20	-0.155756	-0.842338	0.668651	0.848621	1	1869	tags=95%, list=80%, signal=462%
GO_REGULATION_OF_ANION_TRANSPORT	GO_REGULATION_OF_ANION_TRANSPORT		23	-0.145245	-0.841905	0.662162	0.845932	1	480	tags=35%, list=20%, signal=43%
GO_GASTRULATION	GO_GASTRULATION		23	-0.146106	-0.838125	0.660417	0.849505	1	478	tags=35%, list=20%, signal=43%
GO_CARDIAC_CHAMBER_MORPHOGENESIS	GO_CARDIAC_CHAMBER_MORPHOGENESIS		15	-0.183226	-0.836439	0.654369	0.849096	1	1765	tags=93%, list=75%, signal=373%
GO_RESPONSE_TO_INORGANIC_SUBSTANCE	GO_RESPONSE_TO_INORGANIC_SUBSTANCE		79	-0.0810037	-0.832827	0.648033	0.852116	1	1333	tags=65%, list=57%, signal=144%
GO_REGULATION_OF_STAT_CASCADE	GO_REGULATION_OF_STAT_CASCADE		18	-0.163758	-0.832483	0.665306	0.849291	1	1837	tags=94%, list=78%, signal=431%
GO_B_CELL_MEDIATED_IMMUNITY	GO_B_CELL_MEDIATED_IMMUNITY		18	-0.163805	-0.823101	0.679921	0.863068	1	402	tags=33%, list=17%, signal=40%
GO_SENSORY_ORGAN_DEVELOPMENT	GO_SENSORY_ORGAN_DEVELOPMENT		68	-0.0864809	-0.822578	0.678431	0.860532	1	598	tags=34%, list=25%, signal=44%
GO_PHOSPHATIDYLINOSITOL_METABOLIC_PROCESS	GO_PHOSPHATIDYLINOSITOL_METABOLIC_PROCESS		27	-0.132717	-0.819129	0.685654	0.863331	1	1954	tags=96%, list=83%, signal=567%
GO_HEART_DEVELOPMENT	GO_HEART_DEVELOPMENT		64	-0.087894	-0.817334	0.668627	0.863061	1	1708	tags=81%, list=73%, signal=290%
GO_MAINTENANCE_OF_LOCATION	GO_MAINTENANCE_OF_LOCATION		22	-0.142656	-0.810827	0.692469	0.871244	1	1697	tags=86%, list=72%, signal=309%
GO_RESPONSE_TO_CAMP	GO_RESPONSE_TO_CAMP		22	-0.143633	-0.805551	0.685771	0.876991	1	1588	tags=82%, list=68%, signal=250%
GO_REGULATION_OF_CIRCADIAN_RHYTHM	GO_REGULATION_OF_CIRCADIAN_RHYTHM		17	-0.159613	-0.798899	0.734653	0.8851	1	872	tags=53%, list=37%, signal=84%
GO_CELLULAR_RESPONSE_TO_HORMONE_STIMULUS	GO_CELLULAR_RESPONSE_TO_HORMONE_STIMULUS		83	-0.0769382	-0.79791	0.721627	0.883279	1	2005	tags=93%, list=85%, signal=613%
GO_AUTOPHAGY	GO_AUTOPHAGY		38	-0.109547	-0.79519	0.716867	0.884527	1	1787	tags=87%, list=76%, signal=358%
GO_POSITIVE_REGULATION_OF_PROTEIN_IMPORT	GO_POSITIVE_REGULATION_OF_PROTEIN_IMPORT		19	-0.149036	-0.790347	0.732422	0.889625	1	1384	tags=74%, list=59%, signal=178%
GO_IRON_ION_HOMEOSTASIS	GO_IRON_ION_HOMEOSTASIS		17	-0.163298	-0.790007	0.744722	0.886784	1	1554	tags=82%, list=66%, signal=242%
GO_REGULATION_OF_DNA_BINDING	GO_REGULATION_OF_DNA_BINDING		15	-0.16931	-0.788213	0.734021	0.886414	1	1954	tags=100%, list=83%, signal=592%
GO_REGULATION_OF_RECEPTOR_MEDIATED_ENDOCYTOSIS	GO_REGULATION_OF_RECEPTOR_MEDIATED_ENDOCYTOSIS		17	-0.160143	-0.788083	0.721774	0.883217	1	1147	tags=65%, list=49%, signal=126%
GO_MACROAUTOPHAGY	GO_MACROAUTOPHAGY		26	-0.132909	-0.785789	0.713427	0.8838	1	1047	tags=58%, list=45%, signal=103%
GO_TISSUE_HOMEOSTASIS	GO_TISSUE_HOMEOSTASIS		26	-0.128934	-0.782655	0.711281	0.885532	1	1869	tags=92%, list=80%, signal=447%
GO_SULFUR_COMPOUND_BIOSYNTHETIC_PROCESS	GO_SULFUR_COMPOUND_BIOSYNTHETIC_PROCESS		40	-0.104463	-0.781003	0.765835	0.884945	1	1110	tags=58%, list=47%, signal=107%
GO_FEMALE_SEX_DIFFERENTIATION	GO_FEMALE_SEX_DIFFERENTIATION		15	-0.167167	-0.778976	0.763747	0.885005	1	1959	tags=100%, list=83%, signal=600%
GO_NEGATIVE_REGULATION_OF_TRANSMEMBRANE_RECEPTOR_PROTEIN_SERINE_THREONINE_KINASE_SIGNALING_PATHWAY	GO_NEGATIVE_REGULATION_OF_TRANSMEMBRANE_RECEPTOR_PROTEIN_SERINE_THREONINE_KINASE_SIGNALING_PATHWAY		17	-0.154163	-0.777622	0.72619	0.883947	1	56	tags=18%, list=2%, signal=18%
GO_VESICLE_LOCALIZATION	GO_VESICLE_LOCALIZATION		17	-0.159714	-0.774623	0.734021	0.885577	1	1148	tags=65%, list=49%, signal=126%
GO_CARTILAGE_DEVELOPMENT	GO_CARTILAGE_DEVELOPMENT		19	-0.146799	-0.771012	0.749503	0.888099	1	277	tags=26%, list=12%, signal=30%
GO_RESPONSE_TO_NUTRIENT	GO_RESPONSE_TO_NUTRIENT		37	-0.107979	-0.770144	0.775829	0.886198	1	2036	tags=97%, list=87%, signal=721%
GO_FATTY_ACID_BIOSYNTHETIC_PROCESS	GO_FATTY_ACID_BIOSYNTHETIC_PROCESS		24	-0.132028	-0.768528	0.749027	0.885423	1	1553	tags=79%, list=66%, signal=231%
GO_INTRINSIC_APOPTOTIC_SIGNALING_PATHWAY_IN_RESPONSE_TO_DNA_DAMAGE	GO_INTRINSIC_APOPTOTIC_SIGNALING_PATHWAY_IN_RESPONSE_TO_DNA_DAMAGE		15	-0.163709	-0.76434	0.788703	0.888843	1	1654	tags=87%, list=70%, signal=291%
GO_SEX_DIFFERENTIATION	GO_SEX_DIFFERENTIATION		27	-0.12292	-0.759148	0.763527	0.893429	1	1368	tags=70%, list=58%, signal=167%
GO_DEVELOPMENT_OF_PRIMARY_SEXUAL_CHARACTERISTICS	GO_DEVELOPMENT_OF_PRIMARY_SEXUAL_CHARACTERISTICS		21	-0.13328	-0.756668	0.782353	0.894073	1	1368	tags=71%, list=58%, signal=170%
GO_MACROMOLECULE_METHYLATION	GO_MACROMOLECULE_METHYLATION		15	-0.16308	-0.754639	0.78308	0.893928	1	1812	tags=93%, list=77%, signal=406%
GO_RESPONSE_TO_METAL_ION	GO_RESPONSE_TO_METAL_ION		57	-0.0838674	-0.74863	0.776397	0.899852	1	1333	tags=65%, list=57%, signal=147%
GO_RESPONSE_TO_ORGANOPHOSPHORUS	GO_RESPONSE_TO_ORGANOPHOSPHORUS		26	-0.121215	-0.748494	0.796334	0.89679	1	1616	tags=81%, list=69%, signal=256%
GO_CELLULAR_RESPONSE_TO_STEROID_HORMONE_STIMULUS	GO_CELLULAR_RESPONSE_TO_STEROID_HORMONE_STIMULUS		28	-0.118842	-0.748195	0.780851	0.893994	1	480	tags=32%, list=20%, signal=40%
GO_ZYMOGEN_ACTIVATION	GO_ZYMOGEN_ACTIVATION		20	-0.13866	-0.740288	0.785714	0.902577	1	1674	tags=85%, list=71%, signal=294%
GO_PROTEIN_MATURATION	GO_PROTEIN_MATURATION		42	-0.0955272	-0.737778	0.792683	0.90287	1	1961	tags=93%, list=84%, signal=553%
GO_REGULATION_OF_CELLULAR_RESPONSE_TO_GROWTH_FACTOR_STIMULUS	GO_REGULATION_OF_CELLULAR_RESPONSE_TO_GROWTH_FACTOR_STIMULUS		39	-0.100099	-0.73695	0.780198	0.900817	1	1275	tags=64%, list=54%, signal=138%
GO_DNA_BIOSYNTHETIC_PROCESS	GO_DNA_BIOSYNTHETIC_PROCESS		15	-0.154193	-0.734562	0.812749	0.901017	1	737	tags=47%, list=31%, signal=68%
GO_GLAND_MORPHOGENESIS	GO_GLAND_MORPHOGENESIS		22	-0.127804	-0.722697	0.816162	0.914708	1	1945	tags=95%, list=83%, signal=551%
GO_CARBOHYDRATE_CATABOLIC_PROCESS	GO_CARBOHYDRATE_CATABOLIC_PROCESS		17	-0.145255	-0.722463	0.814732	0.911836	1	353	tags=29%, list=15%, signal=34%
GO_SENSORY_PERCEPTION_OF_LIGHT_STIMULUS	GO_SENSORY_PERCEPTION_OF_LIGHT_STIMULUS		16	-0.148049	-0.722085	0.812379	0.909239	1	683	tags=44%, list=29%, signal=61%
GO_EAR_DEVELOPMENT	GO_EAR_DEVELOPMENT		31	-0.109917	-0.721059	0.800416	0.907596	1	428	tags=29%, list=18%, signal=35%
GO_NEGATIVE_REGULATION_OF_KINASE_ACTIVITY	GO_NEGATIVE_REGULATION_OF_KINASE_ACTIVITY		43	-0.0940826	-0.714451	0.811088	0.913543	1	494	tags=30%, list=21%, signal=38%
GO_LIPID_BIOSYNTHETIC_PROCESS	GO_LIPID_BIOSYNTHETIC_PROCESS		87	-0.0678369	-0.711156	0.821285	0.914893	1	1305	tags=62%, list=56%, signal=135%
GO_DEVELOPMENTAL_GROWTH_INVOLVED_IN_MORPHOGENESIS	GO_DEVELOPMENTAL_GROWTH_INVOLVED_IN_MORPHOGENESIS		22	-0.127804	-0.710438	0.794466	0.912647	1	1945	tags=95%, list=83%, signal=551%
GO_POSITIVE_REGULATION_OF_PEPTIDASE_ACTIVITY	GO_POSITIVE_REGULATION_OF_PEPTIDASE_ACTIVITY		24	-0.12206	-0.707016	0.839323	0.913996	1	1674	tags=83%, list=71%, signal=287%
GO_RESPONSE_TO_ESTROGEN	GO_RESPONSE_TO_ESTROGEN		32	-0.1053	-0.70257	0.849594	0.916615	1	1885	tags=91%, list=80%, signal=453%
GO_SODIUM_ION_TRANSPORT	GO_SODIUM_ION_TRANSPORT		24	-0.121773	-0.702337	0.84787	0.913817	1	305	tags=25%, list=13%, signal=28%
GO_REGULATION_OF_RHO_PROTEIN_SIGNAL_TRANSDUCTION	GO_REGULATION_OF_RHO_PROTEIN_SIGNAL_TRANSDUCTION		24	-0.119693	-0.691912	0.84127	0.924026	1	799	tags=46%, list=34%, signal=69%
GO_SENSORY_ORGAN_MORPHOGENESIS	GO_SENSORY_ORGAN_MORPHOGENESIS		33	-0.101302	-0.690802	0.877193	0.922247	1	478	tags=30%, list=20%, signal=38%
GO_GLYCEROLIPID_METABOLIC_PROCESS	GO_GLYCEROLIPID_METABOLIC_PROCESS		59	-0.0750013	-0.686721	0.866126	0.924175	1	1262	tags=61%, list=54%, signal=129%
GO_RESPONSE_TO_TOXIC_SUBSTANCE	GO_RESPONSE_TO_TOXIC_SUBSTANCE		48	-0.0849275	-0.684945	0.872211	0.923126	1	197	tags=17%, list=8%, signal=18%
GO_SINGLE_ORGANISM_CATABOLIC_PROCESS	GO_SINGLE_ORGANISM_CATABOLIC_PROCESS		156	-0.0474336	-0.679716	0.867089	0.926182	1	1944	tags=87%, list=83%, signal=473%
GO_ORGANIC_HYDROXY_COMPOUND_TRANSPORT	GO_ORGANIC_HYDROXY_COMPOUND_TRANSPORT		31	-0.103401	-0.679297	0.867308	0.923616	1	1352	tags=68%, list=58%, signal=158%
GO_REGULATION_OF_WNT_SIGNALING_PATHWAY	GO_REGULATION_OF_WNT_SIGNALING_PATHWAY		26	-0.114722	-0.67851	0.847251	0.921469	1	1902	tags=92%, list=81%, signal=481%
GO_EMBRYO_DEVELOPMENT_ENDING_IN_BIRTH_OR_EGG_HATCHING	GO_EMBRYO_DEVELOPMENT_ENDING_IN_BIRTH_OR_EGG_HATCHING		57	-0.0763246	-0.672462	0.880903	0.925253	1	650	tags=35%, list=28%, signal=47%
GO_NEGATIVE_REGULATION_OF_CELLULAR_RESPONSE_TO_GROWTH_FACTOR_STIMULUS	GO_NEGATIVE_REGULATION_OF_CELLULAR_RESPONSE_TO_GROWTH_FACTOR_STIMULUS		21	-0.120511	-0.660887	0.883399	0.935051	1	56	tags=14%, list=2%, signal=15%
GO_MITOCHONDRIAL_TRANSPORT	GO_MITOCHONDRIAL_TRANSPORT		16	-0.133362	-0.655454	0.889105	0.937628	1	1451	tags=75%, list=62%, signal=195%
GO_STEROID_HORMONE_MEDIATED_SIGNALING_PATHWAY	GO_STEROID_HORMONE_MEDIATED_SIGNALING_PATHWAY		16	-0.132933	-0.648052	0.898438	0.942246	1	865	tags=50%, list=37%, signal=79%
GO_SYNAPTIC_SIGNALING	GO_SYNAPTIC_SIGNALING		21	-0.116131	-0.644958	0.90101	0.942207	1	178	tags=19%, list=8%, signal=20%
GO_GLYCEROPHOSPHOLIPID_METABOLIC_PROCESS	GO_GLYCEROPHOSPHOLIPID_METABOLIC_PROCESS		46	-0.0784573	-0.623556	0.92449	0.959285	1	1709	tags=80%, list=73%, signal=290%
GO_MORPHOGENESIS_OF_EMBRYONIC_EPITHELIUM	GO_MORPHOGENESIS_OF_EMBRYONIC_EPITHELIUM		15	-0.127618	-0.604303	0.955253	0.972105	1	799	tags=47%, list=34%, signal=70%
GO_RESPONSE_TO_PURINE_CONTAINING_COMPOUND	GO_RESPONSE_TO_PURINE_CONTAINING_COMPOUND		31	-0.0879753	-0.598184	0.948104	0.973575	1	1312	tags=65%, list=56%, signal=144%
GO_INNER_EAR_MORPHOGENESIS	GO_INNER_EAR_MORPHOGENESIS		15	-0.126189	-0.596306	0.933071	0.971759	1	1585	tags=80%, list=68%, signal=245%
GO_EAR_MORPHOGENESIS	GO_EAR_MORPHOGENESIS		15	-0.126189	-0.594883	0.948	0.969638	1	1585	tags=80%, list=68%, signal=245%
GO_TUBE_FORMATION	GO_TUBE_FORMATION		16	-0.124678	-0.592829	0.937751	0.967907	1	444	tags=31%, list=19%, signal=38%
GO_RESPONSE_TO_ENDOPLASMIC_RETICULUM_STRESS	GO_RESPONSE_TO_ENDOPLASMIC_RETICULUM_STRESS		25	-0.0933276	-0.556731	0.964215	0.987183	1	1193	tags=60%, list=51%, signal=121%
GO_POSITIVE_REGULATION_OF_PROTEIN_LOCALIZATION_TO_NUCLEUS	GO_POSITIVE_REGULATION_OF_PROTEIN_LOCALIZATION_TO_NUCLEUS		22	-0.0947393	-0.535177	0.97619	0.993751	1	421	tags=27%, list=18%, signal=33%
GO_RESPONSE_TO_CALCIUM_ION	GO_RESPONSE_TO_CALCIUM_ION		21	-0.0963431	-0.52742	0.983333	0.9934	1	2013	tags=95%, list=86%, signal=662%
GO_PHOSPHATIDYLINOSITOL_BIOSYNTHETIC_PROCESS	GO_PHOSPHATIDYLINOSITOL_BIOSYNTHETIC_PROCESS		16	-0.106454	-0.52618	0.984252	0.990682	1	1954	tags=94%, list=83%, signal=555%
GO_OSTEOBLAST_DIFFERENTIATION	GO_OSTEOBLAST_DIFFERENTIATION		30	-0.0803566	-0.509365	0.985597	0.99286	1	1067	tags=53%, list=45%, signal=97%
GO_REGULATION_OF_CHROMATIN_ORGANIZATION	GO_REGULATION_OF_CHROMATIN_ORGANIZATION		17	-0.102354	-0.501694	0.992233	0.991654	1	453	tags=29%, list=19%, signal=36%
GO_RESPONSE_TO_TRANSITION_METAL_NANOPARTICLE	GO_RESPONSE_TO_TRANSITION_METAL_NANOPARTICLE		30	-0.0760713	-0.492536	0.993789	0.990618	1	1390	tags=67%, list=59%, signal=161%

## Sheet: WT vs IKO liver up GO
NAME	GS<br> follow link to MSigDB	GS DETAILS	SIZE	ES	NES	NOM p-val	FDR q-val	FWER p-val	RANK AT MAX	LEADING EDGE
GO_IMMUNE_RESPONSE	GO_IMMUNE_RESPONSE	Details ...	54	0.280702	2.30043	0	0.0978947	0.102	254	tags=70%, list=45%, signal=115%
GO_SMALL_MOLECULE_CATABOLIC_PROCESS	GO_SMALL_MOLECULE_CATABOLIC_PROCESS	Details ...	15	0.476449	2.17954	0	0.113945	0.228	303	tags=100%, list=53%, signal=209%
GO_DEFENSE_RESPONSE	GO_DEFENSE_RESPONSE	Details ...	51	0.265846	2.14422	0.00198807	0.0947454	0.271	162	tags=53%, list=29%, signal=67%
GO_INNATE_IMMUNE_RESPONSE	GO_INNATE_IMMUNE_RESPONSE	Details ...	34	0.294283	2.00389	0	0.162998	0.505	159	tags=56%, list=28%, signal=73%
GO_LEUKOCYTE_ACTIVATION	GO_LEUKOCYTE_ACTIVATION	Details ...	18	0.396175	1.99588	0.00585938	0.138228	0.525	254	tags=83%, list=45%, signal=146%
GO_CATABOLIC_PROCESS	GO_CATABOLIC_PROCESS	Details ...	46	0.247726	1.90177	0.0116732	0.200994	0.727	326	tags=80%, list=57%, signal=174%
GO_LIPID_METABOLIC_PROCESS	GO_LIPID_METABOLIC_PROCESS	Details ...	50	0.223598	1.80855	0.026616	0.293833	0.894	337	tags=80%, list=59%, signal=180%
GO_CELLULAR_RESPONSE_TO_CYTOKINE_STIMULUS	GO_CELLULAR_RESPONSE_TO_CYTOKINE_STIMULUS	Details ...	39	0.256556	1.78188	0.0205761	0.293175	0.921	227	tags=64%, list=40%, signal=100%
GO_CELLULAR_CATABOLIC_PROCESS	GO_CELLULAR_CATABOLIC_PROCESS	Details ...	37	0.250433	1.72925	0.0338983	0.343152	0.962	326	tags=81%, list=57%, signal=178%
GO_LYMPHOCYTE_ACTIVATION	GO_LYMPHOCYTE_ACTIVATION	Details ...	15	0.359783	1.69289	0.0268595	0.375435	0.982	254	tags=80%, list=45%, signal=141%
GO_IMMUNE_SYSTEM_PROCESS	GO_IMMUNE_SYSTEM_PROCESS	Details ...	79	0.172442	1.6891	0.0255403	0.347305	0.983	245	tags=58%, list=43%, signal=88%
GO_OXIDATION_REDUCTION_PROCESS	GO_OXIDATION_REDUCTION_PROCESS	Details ...	39	0.231498	1.66345	0.0307692	0.363746	0.987	342	tags=82%, list=60%, signal=193%
GO_REGULATION_OF_CELL_CELL_ADHESION	GO_REGULATION_OF_CELL_CELL_ADHESION	Details ...	15	0.358333	1.64035	0.0320641	0.373751	0.992	217	tags=73%, list=38%, signal=116%
GO_ORGANOPHOSPHATE_METABOLIC_PROCESS	GO_ORGANOPHOSPHATE_METABOLIC_PROCESS	Details ...	28	0.267161	1.62024	0.0465587	0.383984	0.993	422	tags=100%, list=74%, signal=372%
GO_NEUROLOGICAL_SYSTEM_PROCESS	GO_NEUROLOGICAL_SYSTEM_PROCESS	Details ...	15	0.347101	1.60968	0.0383065	0.376579	0.995	72	tags=47%, list=13%, signal=52%
GO_RESPONSE_TO_CYTOKINE	GO_RESPONSE_TO_CYTOKINE	Details ...	49	0.199945	1.59314	0.0420168	0.379615	0.999	231	tags=59%, list=41%, signal=91%
GO_REGULATION_OF_CYTOKINE_PRODUCTION	GO_REGULATION_OF_CYTOKINE_PRODUCTION	Details ...	26	0.25423	1.51746	0.0531496	0.500879	1	254	tags=69%, list=45%, signal=120%
GO_PHOSPHATE_CONTAINING_COMPOUND_METABOLIC_PROCESS	GO_PHOSPHATE_CONTAINING_COMPOUND_METABOLIC_PROCESS	Details ...	70	0.161771	1.5064	0.059761	0.498378	1	437	tags=91%, list=77%, signal=350%
GO_REGULATION_OF_INNATE_IMMUNE_RESPONSE	GO_REGULATION_OF_INNATE_IMMUNE_RESPONSE	Details ...	23	0.261189	1.50249	0.083682	0.479614	1	276	tags=74%, list=49%, signal=138%
GO_IMMUNE_EFFECTOR_PROCESS	GO_IMMUNE_EFFECTOR_PROCESS	Details ...	21	0.274725	1.48042	0.0821643	0.504866	1	254	tags=71%, list=45%, signal=125%
GO_POSITIVE_REGULATION_OF_CYTOKINE_PRODUCTION	GO_POSITIVE_REGULATION_OF_CYTOKINE_PRODUCTION		16	0.308984	1.4802	0.0892495	0.481838	1	254	tags=75%, list=45%, signal=132%
GO_POSITIVE_REGULATION_OF_INNATE_IMMUNE_RESPONSE	GO_POSITIVE_REGULATION_OF_INNATE_IMMUNE_RESPONSE		15	0.319928	1.47335	0.0857143	0.47355	1	276	tags=80%, list=49%, signal=152%
GO_CYTOKINE_MEDIATED_SIGNALING_PATHWAY	GO_CYTOKINE_MEDIATED_SIGNALING_PATHWAY		27	0.244444	1.43069	0.090535	0.545373	1	245	tags=67%, list=43%, signal=112%
GO_MONOCARBOXYLIC_ACID_METABOLIC_PROCESS	GO_MONOCARBOXYLIC_ACID_METABOLIC_PROCESS		29	0.228048	1.42515	0.102	0.533823	1	326	tags=79%, list=57%, signal=177%
GO_DEFENSE_RESPONSE_TO_OTHER_ORGANISM	GO_DEFENSE_RESPONSE_TO_OTHER_ORGANISM		16	0.308984	1.42258	0.10978	0.517513	1	254	tags=75%, list=45%, signal=132%
GO_SINGLE_ORGANISM_CATABOLIC_PROCESS	GO_SINGLE_ORGANISM_CATABOLIC_PROCESS		31	0.217682	1.41008	0.0989691	0.523596	1	303	tags=74%, list=53%, signal=151%
GO_ADAPTIVE_IMMUNE_RESPONSE	GO_ADAPTIVE_IMMUNE_RESPONSE		15	0.305435	1.39287	0.0889328	0.540563	1	284	tags=80%, list=50%, signal=156%
GO_POSITIVE_REGULATION_OF_TRANSFERASE_ACTIVITY	GO_POSITIVE_REGULATION_OF_TRANSFERASE_ACTIVITY		21	0.249084	1.36387	0.128155	0.585853	1	214	tags=62%, list=38%, signal=96%
GO_CELL_ACTIVATION	GO_CELL_ACTIVATION		22	0.247373	1.34546	0.116327	0.607958	1	225	tags=64%, list=40%, signal=101%
GO_POSTTRANSCRIPTIONAL_REGULATION_OF_GENE_EXPRESSION	GO_POSTTRANSCRIPTIONAL_REGULATION_OF_GENE_EXPRESSION		17	0.273797	1.33912	0.122951	0.602869	1	282	tags=76%, list=50%, signal=148%
GO_ORGANIC_HYDROXY_COMPOUND_METABOLIC_PROCESS	GO_ORGANIC_HYDROXY_COMPOUND_METABOLIC_PROCESS		27	0.218519	1.30544	0.150198	0.665997	1	301	tags=74%, list=53%, signal=150%
GO_ALCOHOL_METABOLIC_PROCESS	GO_ALCOHOL_METABOLIC_PROCESS		17	0.256791	1.27032	0.178782	0.738629	1	258	tags=71%, list=46%, signal=126%
GO_NEGATIVE_REGULATION_OF_IMMUNE_SYSTEM_PROCESS	GO_NEGATIVE_REGULATION_OF_IMMUNE_SYSTEM_PROCESS		17	0.248342	1.23189	0.210421	0.82509	1	296	tags=76%, list=52%, signal=155%
GO_POSITIVE_REGULATION_OF_CELLULAR_COMPONENT_ORGANIZATION	GO_POSITIVE_REGULATION_OF_CELLULAR_COMPONENT_ORGANIZATION		40	0.171679	1.22457	0.211694	0.822146	1	433	tags=93%, list=76%, signal=364%
GO_ORGANIC_ACID_TRANSPORT	GO_ORGANIC_ACID_TRANSPORT		15	0.26558	1.22012	0.235067	0.810843	1	306	tags=80%, list=54%, signal=169%
GO_CELLULAR_LIPID_METABOLIC_PROCESS	GO_CELLULAR_LIPID_METABOLIC_PROCESS		34	0.17934	1.21987	0.230159	0.789105	1	337	tags=76%, list=59%, signal=177%
GO_REGULATION_OF_IMMUNE_SYSTEM_PROCESS	GO_REGULATION_OF_IMMUNE_SYSTEM_PROCESS		55	0.144318	1.21769	0.207171	0.773679	1	255	tags=58%, list=45%, signal=95%
GO_NEGATIVE_REGULATION_OF_MULTICELLULAR_ORGANISMAL_PROCESS	GO_NEGATIVE_REGULATION_OF_MULTICELLULAR_ORGANISMAL_PROCESS		38	0.172321	1.21706	0.225673	0.754605	1	445	tags=95%, list=78%, signal=411%
GO_REGULATION_OF_MULTICELLULAR_ORGANISMAL_DEVELOPMENT	GO_REGULATION_OF_MULTICELLULAR_ORGANISMAL_DEVELOPMENT		61	0.137238	1.21308	0.212724	0.746105	1	227	tags=52%, list=40%, signal=78%
GO_REGULATION_OF_GTPASE_ACTIVITY	GO_REGULATION_OF_GTPASE_ACTIVITY		18	0.235883	1.20587	0.211132	0.746923	1	216	tags=61%, list=38%, signal=96%
GO_REGULATION_OF_CELLULAR_LOCALIZATION	GO_REGULATION_OF_CELLULAR_LOCALIZATION		37	0.174248	1.20417	0.237548	0.733215	1	443	tags=95%, list=78%, signal=404%
GO_PHOSPHORYLATION	GO_PHOSPHORYLATION		46	0.157431	1.19283	0.237219	0.744344	1	447	tags=93%, list=79%, signal=406%
GO_ANION_TRANSPORT	GO_ANION_TRANSPORT		21	0.221612	1.18295	0.23913	0.751328	1	391	tags=90%, list=69%, signal=281%
GO_POSITIVE_REGULATION_OF_CATALYTIC_ACTIVITY	GO_POSITIVE_REGULATION_OF_CATALYTIC_ACTIVITY		48	0.150891	1.16826	0.234818	0.771469	1	216	tags=52%, list=38%, signal=77%
GO_REGULATION_OF_CELL_ACTIVATION	GO_REGULATION_OF_CELL_ACTIVATION		17	0.241818	1.15925	0.280769	0.777929	1	433	tags=100%, list=76%, signal=410%
GO_POSITIVE_REGULATION_OF_MOLECULAR_FUNCTION	GO_POSITIVE_REGULATION_OF_MOLECULAR_FUNCTION		56	0.13772	1.15746	0.272212	0.765403	1	445	tags=91%, list=78%, signal=381%
GO_POSITIVE_REGULATION_OF_CELLULAR_PROTEIN_LOCALIZATION	GO_POSITIVE_REGULATION_OF_CELLULAR_PROTEIN_LOCALIZATION		15	0.248188	1.15254	0.260606	0.760442	1	429	tags=100%, list=76%, signal=400%
GO_POSITIVE_REGULATION_OF_IMMUNE_SYSTEM_PROCESS	GO_POSITIVE_REGULATION_OF_IMMUNE_SYSTEM_PROCESS		42	0.157143	1.15057	0.246575	0.749996	1	254	tags=60%, list=45%, signal=100%
GO_NUCLEOBASE_CONTAINING_SMALL_MOLECULE_METABOLIC_PROCESS	GO_NUCLEOBASE_CONTAINING_SMALL_MOLECULE_METABOLIC_PROCESS		15	0.246377	1.14503	0.281496	0.749207	1	430	tags=100%, list=76%, signal=403%
GO_REGULATION_OF_CELLULAR_PROTEIN_LOCALIZATION	GO_REGULATION_OF_CELLULAR_PROTEIN_LOCALIZATION		22	0.204087	1.12941	0.3	0.773743	1	429	tags=95%, list=76%, signal=377%
GO_REGULATION_OF_ION_TRANSPORT	GO_REGULATION_OF_ION_TRANSPORT		16	0.241379	1.1221	0.307692	0.776956	1	433	tags=100%, list=76%, signal=411%
GO_REGULATION_OF_NERVOUS_SYSTEM_DEVELOPMENT	GO_REGULATION_OF_NERVOUS_SYSTEM_DEVELOPMENT		30	0.180819	1.11873	0.302658	0.769994	1	450	tags=97%, list=79%, signal=444%
GO_POSITIVE_REGULATION_OF_NERVOUS_SYSTEM_DEVELOPMENT	GO_POSITIVE_REGULATION_OF_NERVOUS_SYSTEM_DEVELOPMENT		15	0.25	1.11568	0.296537	0.762871	1	428	tags=100%, list=75%, signal=397%
GO_POSITIVE_REGULATION_OF_INTRACELLULAR_TRANSPORT	GO_POSITIVE_REGULATION_OF_INTRACELLULAR_TRANSPORT		15	0.240942	1.11021	0.304082	0.76214	1	433	tags=100%, list=76%, signal=412%
GO_ORGANONITROGEN_COMPOUND_METABOLIC_PROCESS	GO_ORGANONITROGEN_COMPOUND_METABOLIC_PROCESS		54	0.134503	1.11019	0.320611	0.74833	1	434	tags=89%, list=77%, signal=343%
GO_ORGANIC_ANION_TRANSPORT	GO_ORGANIC_ANION_TRANSPORT		19	0.21773	1.10141	0.344894	0.755824	1	387	tags=89%, list=68%, signal=272%
GO_REGULATION_OF_IMMUNE_RESPONSE	GO_REGULATION_OF_IMMUNE_RESPONSE		39	0.153409	1.09833	0.339216	0.749597	1	296	tags=67%, list=52%, signal=130%
GO_REGULATION_OF_INTRACELLULAR_TRANSPORT	GO_REGULATION_OF_INTRACELLULAR_TRANSPORT		22	0.196747	1.09165	0.339321	0.752597	1	433	tags=95%, list=76%, signal=388%
GO_SYSTEM_PROCESS	GO_SYSTEM_PROCESS		36	0.159134	1.08591	0.329193	0.752725	1	72	tags=28%, list=13%, signal=30%
GO_MITOTIC_CELL_CYCLE	GO_MITOTIC_CELL_CYCLE		17	0.218182	1.08182	0.34413	0.750683	1	446	tags=100%, list=79%, signal=455%
GO_POSITIVE_REGULATION_OF_MULTICELLULAR_ORGANISMAL_PROCESS	GO_POSITIVE_REGULATION_OF_MULTICELLULAR_ORGANISMAL_PROCESS		54	0.131579	1.05882	0.383234	0.791954	1	257	tags=57%, list=45%, signal=95%
GO_POSITIVE_REGULATION_OF_CELL_DEATH	GO_POSITIVE_REGULATION_OF_CELL_DEATH		27	0.172222	1.05776	0.349705	0.781835	1	179	tags=48%, list=32%, signal=67%
GO_REGULATION_OF_PROTEIN_LOCALIZATION	GO_REGULATION_OF_PROTEIN_LOCALIZATION		31	0.16123	1.05465	0.382643	0.777211	1	443	tags=94%, list=78%, signal=404%
GO_POSITIVE_REGULATION_OF_DEFENSE_RESPONSE	GO_POSITIVE_REGULATION_OF_DEFENSE_RESPONSE		19	0.202459	1.05049	0.380081	0.774105	1	276	tags=68%, list=49%, signal=129%
GO_SINGLE_ORGANISM_CELL_ADHESION	GO_SINGLE_ORGANISM_CELL_ADHESION		19	0.20121	1.04709	0.410359	0.769672	1	217	tags=58%, list=38%, signal=91%
GO_ESTABLISHMENT_OF_PROTEIN_LOCALIZATION	GO_ESTABLISHMENT_OF_PROTEIN_LOCALIZATION		26	0.172615	1.03165	0.397149	0.79428	1	429	tags=92%, list=76%, signal=362%
GO_POSITIVE_REGULATION_OF_IMMUNE_RESPONSE	GO_POSITIVE_REGULATION_OF_IMMUNE_RESPONSE		27	0.172222	1.02868	0.392713	0.789211	1	284	tags=67%, list=50%, signal=127%
GO_REGULATION_OF_CELL_DEVELOPMENT	GO_REGULATION_OF_CELL_DEVELOPMENT		33	0.152877	1.01055	0.409091	0.820379	1	450	tags=94%, list=79%, signal=429%
GO_CHROMOSOME_ORGANIZATION	GO_CHROMOSOME_ORGANIZATION		16	0.213589	1.01023	0.389328	0.809385	1	342	tags=81%, list=60%, signal=199%
GO_REGULATION_OF_ORGANELLE_ORGANIZATION	GO_REGULATION_OF_ORGANELLE_ORGANIZATION		27	0.168519	1.00426	0.411306	0.811903	1	433	tags=93%, list=76%, signal=373%
GO_RESPONSE_TO_OXIDATIVE_STRESS	GO_RESPONSE_TO_OXIDATIVE_STRESS		19	0.194487	1.00188	0.444223	0.806314	1	161	tags=47%, list=28%, signal=64%
GO_PROTEIN_PHOSPHORYLATION	GO_PROTEIN_PHOSPHORYLATION		38	0.140334	0.984302	0.455621	0.835934	1	447	tags=92%, list=79%, signal=406%
GO_TRANSMEMBRANE_RECEPTOR_PROTEIN_TYROSINE_KINASE_SIGNALING_PATHWAY	GO_TRANSMEMBRANE_RECEPTOR_PROTEIN_TYROSINE_KINASE_SIGNALING_PATHWAY		22	0.181151	0.97778	0.480493	0.839421	1	158	tags=45%, list=28%, signal=61%
GO_SKELETAL_SYSTEM_DEVELOPMENT	GO_SKELETAL_SYSTEM_DEVELOPMENT		15	0.208696	0.970302	0.490347	0.845053	1	413	tags=93%, list=73%, signal=335%
GO_REGULATION_OF_NEURON_PROJECTION_DEVELOPMENT	GO_REGULATION_OF_NEURON_PROJECTION_DEVELOPMENT		15	0.210145	0.966913	0.465209	0.841504	1	450	tags=100%, list=79%, signal=472%
GO_LIPID_BIOSYNTHETIC_PROCESS	GO_LIPID_BIOSYNTHETIC_PROCESS		27	0.159259	0.955511	0.479079	0.856596	1	417	tags=89%, list=74%, signal=320%
GO_REGULATION_OF_CELL_PROJECTION_ORGANIZATION	GO_REGULATION_OF_CELL_PROJECTION_ORGANIZATION		22	0.174312	0.948415	0.485417	0.861096	1	471	tags=100%, list=83%, signal=568%
GO_POSITIVE_REGULATION_OF_PROTEIN_MODIFICATION_PROCESS	GO_POSITIVE_REGULATION_OF_PROTEIN_MODIFICATION_PROCESS		31	0.14486	0.945598	0.5	0.856511	1	214	tags=52%, list=38%, signal=78%
GO_NEGATIVE_REGULATION_OF_GENE_EXPRESSION	GO_NEGATIVE_REGULATION_OF_GENE_EXPRESSION		55	0.113565	0.94003	0.512922	0.857531	1	446	tags=89%, list=79%, signal=377%
GO_SMALL_MOLECULE_METABOLIC_PROCESS	GO_SMALL_MOLECULE_METABOLIC_PROCESS		72	0.1	0.939192	0.510557	0.848376	1	422	tags=83%, list=74%, signal=284%
GO_ACTIVATION_OF_IMMUNE_RESPONSE	GO_ACTIVATION_OF_IMMUNE_RESPONSE		21	0.17033	0.923972	0.518293	0.871013	1	284	tags=67%, list=50%, signal=129%
GO_POSITIVE_REGULATION_OF_ESTABLISHMENT_OF_PROTEIN_LOCALIZATION	GO_POSITIVE_REGULATION_OF_ESTABLISHMENT_OF_PROTEIN_LOCALIZATION		17	0.188449	0.923783	0.560636	0.860795	1	429	tags=94%, list=76%, signal=375%
GO_POSITIVE_REGULATION_OF_HYDROLASE_ACTIVITY	GO_POSITIVE_REGULATION_OF_HYDROLASE_ACTIVITY		27	0.153704	0.923041	0.566866	0.852103	1	462	tags=96%, list=81%, signal=495%
GO_SIGNAL_TRANSDUCTION_BY_PROTEIN_PHOSPHORYLATION	GO_SIGNAL_TRANSDUCTION_BY_PROTEIN_PHOSPHORYLATION		18	0.178506	0.901768	0.588694	0.888695	1	216	tags=56%, list=38%, signal=87%
GO_REGULATION_OF_LIPID_METABOLIC_PROCESS	GO_REGULATION_OF_LIPID_METABOLIC_PROCESS		18	0.173953	0.885004	0.594697	0.913189	1	439	tags=94%, list=77%, signal=405%
GO_REGULATION_OF_CELLULAR_COMPONENT_BIOGENESIS	GO_REGULATION_OF_CELLULAR_COMPONENT_BIOGENESIS		26	0.146168	0.882736	0.588358	0.9074	1	138	tags=38%, list=24%, signal=49%
GO_CELLULAR_RESPONSE_TO_DNA_DAMAGE_STIMULUS	GO_CELLULAR_RESPONSE_TO_DNA_DAMAGE_STIMULUS		18	0.174863	0.874949	0.623047	0.91381	1	407	tags=89%, list=72%, signal=305%
GO_POSITIVE_REGULATION_OF_CELL_COMMUNICATION	GO_POSITIVE_REGULATION_OF_CELL_COMMUNICATION		57	0.10227	0.858708	0.632114	0.936942	1	106	tags=28%, list=19%, signal=31%
GO_LIPID_LOCALIZATION	GO_LIPID_LOCALIZATION		15	0.185145	0.856703	0.611222	0.930969	1	48	tags=27%, list=8%, signal=28%
GO_REGULATION_OF_SECRETION	GO_REGULATION_OF_SECRETION		19	0.165674	0.854731	0.623529	0.924696	1	326	tags=74%, list=57%, signal=168%
GO_POSITIVE_REGULATION_OF_CELL_DEVELOPMENT	GO_POSITIVE_REGULATION_OF_CELL_DEVELOPMENT		15	0.184058	0.847789	0.648077	0.928959	1	162	tags=47%, list=29%, signal=64%
GO_PROTEIN_LOCALIZATION	GO_PROTEIN_LOCALIZATION		34	0.124379	0.839865	0.652632	0.934946	1	433	tags=88%, list=76%, signal=351%
GO_REGULATION_OF_CYTOSKELETON_ORGANIZATION	GO_REGULATION_OF_CYTOSKELETON_ORGANIZATION		16	0.177064	0.839663	0.668712	0.925213	1	433	tags=94%, list=76%, signal=385%
GO_GLYCEROLIPID_METABOLIC_PROCESS	GO_GLYCEROLIPID_METABOLIC_PROCESS		16	0.177064	0.835417	0.693069	0.923335	1	433	tags=94%, list=76%, signal=385%
GO_REGULATION_OF_ANATOMICAL_STRUCTURE_MORPHOGENESIS	GO_REGULATION_OF_ANATOMICAL_STRUCTURE_MORPHOGENESIS		35	0.119549	0.831724	0.674227	0.920844	1	227	tags=51%, list=40%, signal=80%
GO_REGULATION_OF_HOMEOSTATIC_PROCESS	GO_REGULATION_OF_HOMEOSTATIC_PROCESS		15	0.172464	0.806194	0.703704	0.960805	1	433	tags=93%, list=76%, signal=384%
GO_NEGATIVE_REGULATION_OF_CELL_COMMUNICATION	GO_NEGATIVE_REGULATION_OF_CELL_COMMUNICATION		48	0.103324	0.802039	0.704082	0.958829	1	158	tags=38%, list=28%, signal=48%
GO_REGULATION_OF_HYDROLASE_ACTIVITY	GO_REGULATION_OF_HYDROLASE_ACTIVITY		42	0.106667	0.795711	0.716024	0.961076	1	132	tags=33%, list=23%, signal=40%
GO_IMMUNE_SYSTEM_DEVELOPMENT	GO_IMMUNE_SYSTEM_DEVELOPMENT		21	0.142857	0.792117	0.731225	0.957647	1	407	tags=86%, list=72%, signal=293%
GO_TUBE_DEVELOPMENT	GO_TUBE_DEVELOPMENT		21	0.14652	0.788845	0.691406	0.954451	1	405	tags=86%, list=71%, signal=289%
GO_CELLULAR_RESPONSE_TO_OXYGEN_CONTAINING_COMPOUND	GO_CELLULAR_RESPONSE_TO_OXYGEN_CONTAINING_COMPOUND		38	0.109641	0.788067	0.710204	0.946254	1	508	tags=100%, list=90%, signal=897%
GO_RESPONSE_TO_BIOTIC_STIMULUS	GO_RESPONSE_TO_BIOTIC_STIMULUS		42	0.105714	0.7873	0.724409	0.938191	1	254	tags=55%, list=45%, signal=92%
GO_POSITIVE_REGULATION_OF_KINASE_ACTIVITY	GO_POSITIVE_REGULATION_OF_KINASE_ACTIVITY		15	0.168478	0.785198	0.733202	0.932728	1	95	tags=33%, list=17%, signal=39%
GO_INTERSPECIES_INTERACTION_BETWEEN_ORGANISMS	GO_INTERSPECIES_INTERACTION_BETWEEN_ORGANISMS		23	0.13547	0.772762	0.776	0.945387	1	443	tags=91%, list=78%, signal=401%
GO_REGULATION_OF_EPITHELIAL_CELL_PROLIFERATION	GO_REGULATION_OF_EPITHELIAL_CELL_PROLIFERATION		16	0.165041	0.77119	0.736418	0.939071	1	227	tags=56%, list=40%, signal=91%
GO_HEAD_DEVELOPMENT	GO_HEAD_DEVELOPMENT		20	0.146801	0.767665	0.759152	0.935932	1	429	tags=90%, list=76%, signal=357%
GO_POSITIVE_REGULATION_OF_RESPONSE_TO_EXTERNAL_STIMULUS	GO_POSITIVE_REGULATION_OF_RESPONSE_TO_EXTERNAL_STIMULUS		15	0.166304	0.766616	0.750965	0.928806	1	134	tags=40%, list=24%, signal=51%
GO_REGULATION_OF_CATABOLIC_PROCESS	GO_REGULATION_OF_CATABOLIC_PROCESS		21	0.141026	0.764455	0.745059	0.924206	1	111	tags=33%, list=20%, signal=40%
GO_REGULATION_OF_TRANSPORT	GO_REGULATION_OF_TRANSPORT		53	0.0936055	0.755174	0.779528	0.930158	1	443	tags=87%, list=78%, signal=360%
GO_PROTEIN_CATABOLIC_PROCESS	GO_PROTEIN_CATABOLIC_PROCESS		15	0.16087	0.74026	0.785714	0.944885	1	326	tags=73%, list=57%, signal=168%
GO_CELL_CYCLE_PROCESS	GO_CELL_CYCLE_PROCESS		26	0.117517	0.699687	0.857143	0.995897	1	437	tags=88%, list=77%, signal=368%
GO_POSITIVE_REGULATION_OF_RESPONSE_TO_STIMULUS	GO_POSITIVE_REGULATION_OF_RESPONSE_TO_STIMULUS		75	0.0712196	0.693766	0.873518	0.99486	1	410	tags=79%, list=72%, signal=247%
GO_CELLULAR_MACROMOLECULAR_COMPLEX_ASSEMBLY	GO_CELLULAR_MACROMOLECULAR_COMPLEX_ASSEMBLY		15	0.148188	0.687733	0.850895	0.994028	1	144	tags=40%, list=25%, signal=52%
GO_NEGATIVE_REGULATION_OF_RESPONSE_TO_STIMULUS	GO_NEGATIVE_REGULATION_OF_RESPONSE_TO_STIMULUS		57	0.0783282	0.669784	0.875728	1	1	158	tags=35%, list=28%, signal=44%
GO_CELL_CELL_ADHESION	GO_CELL_CELL_ADHESION		25	0.112177	0.667482	0.866397	1	1	165	tags=40%, list=29%, signal=54%
GO_REGULATION_OF_INTRACELLULAR_SIGNAL_TRANSDUCTION	GO_REGULATION_OF_INTRACELLULAR_SIGNAL_TRANSDUCTION		65	0.0748084	0.665325	0.883197	0.995221	1	511	tags=97%, list=90%, signal=869%
GO_REGULATION_OF_DEFENSE_RESPONSE	GO_REGULATION_OF_DEFENSE_RESPONSE		34	0.0989957	0.665193	0.876209	0.98683	1	113	tags=29%, list=20%, signal=35%
GO_CELLULAR_RESPONSE_TO_ORGANIC_SUBSTANCE	GO_CELLULAR_RESPONSE_TO_ORGANIC_SUBSTANCE		90	0.0637317	0.665176	0.89	0.978498	1	523	tags=98%, list=92%, signal=1060%
GO_MACROMOLECULE_CATABOLIC_PROCESS	GO_MACROMOLECULE_CATABOLIC_PROCESS		17	0.133155	0.656982	0.890042	0.979409	1	326	tags=71%, list=57%, signal=161%
GO_REGULATION_OF_APOPTOTIC_SIGNALING_PATHWAY	GO_REGULATION_OF_APOPTOTIC_SIGNALING_PATHWAY		19	0.124664	0.649698	0.882353	0.979568	1	438	tags=89%, list=77%, signal=380%
GO_REGULATION_OF_CELL_MORPHOGENESIS	GO_REGULATION_OF_CELL_MORPHOGENESIS		15	0.141667	0.646178	0.884615	0.975001	1	450	tags=93%, list=79%, signal=440%
GO_RESPONSE_TO_TOXIC_SUBSTANCE	GO_RESPONSE_TO_TOXIC_SUBSTANCE		19	0.123127	0.629017	0.907975	0.983843	1	409	tags=84%, list=72%, signal=292%
GO_MULTICELLULAR_ORGANISM_REPRODUCTION	GO_MULTICELLULAR_ORGANISM_REPRODUCTION		27	0.103704	0.62375	0.903543	0.980934	1	195	tags=44%, list=34%, signal=65%
GO_ESTABLISHMENT_OF_LOCALIZATION_IN_CELL	GO_ESTABLISHMENT_OF_LOCALIZATION_IN_CELL		26	0.104578	0.619311	0.910021	0.97669	1	444	tags=88%, list=78%, signal=389%
GO_POSITIVE_REGULATION_OF_CELLULAR_COMPONENT_BIOGENESIS	GO_POSITIVE_REGULATION_OF_CELLULAR_COMPONENT_BIOGENESIS		16	0.125227	0.603598	0.947791	0.982256	1	497	tags=100%, list=88%, signal=787%
GO_POSITIVE_REGULATION_OF_PHOSPHORUS_METABOLIC_PROCESS	GO_POSITIVE_REGULATION_OF_PHOSPHORUS_METABOLIC_PROCESS		30	0.092365	0.59858	0.94274	0.978407	1	214	tags=47%, list=38%, signal=71%
GO_RESPONSE_TO_ABIOTIC_STIMULUS	GO_RESPONSE_TO_ABIOTIC_STIMULUS		49	0.0758411	0.597583	0.925926	0.971444	1	87	tags=22%, list=15%, signal=24%
GO_CELLULAR_AMIDE_METABOLIC_PROCESS	GO_CELLULAR_AMIDE_METABOLIC_PROCESS		15	0.124638	0.582226	0.957115	0.974588	1	346	tags=73%, list=61%, signal=183%
GO_REGULATION_OF_CELLULAR_RESPONSE_TO_STRESS	GO_REGULATION_OF_CELLULAR_RESPONSE_TO_STRESS		23	0.0993446	0.564749	0.967985	0.977536	1	438	tags=87%, list=77%, signal=367%
GO_POSITIVE_REGULATION_OF_TRANSPORT	GO_POSITIVE_REGULATION_OF_TRANSPORT		32	0.0830023	0.55122	0.96281	0.977256	1	433	tags=84%, list=76%, signal=337%
GO_ION_TRANSPORT	GO_ION_TRANSPORT		47	0.0610884	0.477216	0.998127	0.993272	1	112	tags=26%, list=20%, signal=29%

## Sheet: WT vs IKO liver down GO
NAME	GS<br> follow link to MSigDB	GS DETAILS	SIZE	ES	NES	NOM p-val	FDR q-val	FWER p-val	RANK AT MAX	LEADING EDGE
GO_RESPONSE_TO_TOPOLOGICALLY_INCORRECT_PROTEIN	GO_RESPONSE_TO_TOPOLOGICALLY_INCORRECT_PROTEIN	Details ...	17	-0.512086	-2.48076	0	0.0393096	0.034	253	tags=94%, list=45%, signal=165%
GO_NEGATIVE_REGULATION_OF_PHOSPHORYLATION	GO_NEGATIVE_REGULATION_OF_PHOSPHORYLATION	Details ...	16	-0.406193	-1.96139	0.0167364	0.528392	0.607	167	tags=69%, list=29%, signal=95%
GO_CYTOSKELETON_ORGANIZATION	GO_CYTOSKELETON_ORGANIZATION	Details ...	27	-0.307407	-1.84773	0.006	0.664008	0.832	318	tags=85%, list=56%, signal=185%
GO_NEGATIVE_REGULATION_OF_PHOSPHORUS_METABOLIC_PROCESS	GO_NEGATIVE_REGULATION_OF_PHOSPHORUS_METABOLIC_PROCESS	Details ...	18	-0.35428	-1.81289	0.0141129	0.608849	0.892	216	tags=72%, list=38%, signal=113%
GO_VASCULATURE_DEVELOPMENT	GO_VASCULATURE_DEVELOPMENT	Details ...	20	-0.332724	-1.76523	0.0178571	0.626176	0.944	386	tags=100%, list=68%, signal=302%
GO_RESPONSE_TO_WOUNDING	GO_RESPONSE_TO_WOUNDING	Details ...	23	-0.313379	-1.75343	0.029703	0.55734	0.953	151	tags=57%, list=27%, signal=74%
GO_CELLULAR_RESPONSE_TO_EXTERNAL_STIMULUS	GO_CELLULAR_RESPONSE_TO_EXTERNAL_STIMULUS	Details ...	15	-0.385145	-1.75144	0.0342052	0.482512	0.953	242	tags=80%, list=43%, signal=136%
GO_NEGATIVE_REGULATION_OF_MOLECULAR_FUNCTION	GO_NEGATIVE_REGULATION_OF_MOLECULAR_FUNCTION	Details ...	35	-0.252256	-1.73331	0.0211946	0.463999	0.971	207	tags=60%, list=37%, signal=89%
GO_TISSUE_DEVELOPMENT	GO_TISSUE_DEVELOPMENT	Details ...	56	-0.204256	-1.72177	0.0277778	0.432908	0.976	251	tags=63%, list=44%, signal=101%
GO_PEPTIDYL_AMINO_ACID_MODIFICATION	GO_PEPTIDYL_AMINO_ACID_MODIFICATION	Details ...	23	-0.297954	-1.69725	0.0238612	0.43847	0.984	258	tags=74%, list=46%, signal=130%
GO_REGULATION_OF_BODY_FLUID_LEVELS	GO_REGULATION_OF_BODY_FLUID_LEVELS	Details ...	22	-0.304254	-1.66855	0.031746	0.459657	0.992	196	tags=64%, list=35%, signal=93%
GO_WOUND_HEALING	GO_WOUND_HEALING	Details ...	18	-0.32969	-1.64796	0.0288462	0.468473	0.996	135	tags=56%, list=24%, signal=71%
GO_CIRCULATORY_SYSTEM_DEVELOPMENT	GO_CIRCULATORY_SYSTEM_DEVELOPMENT	Details ...	29	-0.265607	-1.64221	0.039548	0.445264	0.996	386	tags=93%, list=68%, signal=277%
GO_NEURON_DEVELOPMENT	GO_NEURON_DEVELOPMENT	Details ...	17	-0.313797	-1.55911	0.0531697	0.610421	0.999	262	tags=76%, list=46%, signal=138%
GO_BLOOD_VESSEL_MORPHOGENESIS	GO_BLOOD_VESSEL_MORPHOGENESIS	Details ...	16	-0.330309	-1.55725	0.0645756	0.575299	0.999	386	tags=100%, list=68%, signal=304%
GO_RESPONSE_TO_STEROID_HORMONE	GO_RESPONSE_TO_STEROID_HORMONE	Details ...	25	-0.26369	-1.54644	0.0640496	0.567372	1	289	tags=76%, list=51%, signal=148%
GO_MORPHOGENESIS_OF_AN_EPITHELIUM	GO_MORPHOGENESIS_OF_AN_EPITHELIUM	Details ...	16	-0.318058	-1.54209	0.0540541	0.543563	1	251	tags=75%, list=44%, signal=131%
GO_REGULATION_OF_PROTEOLYSIS	GO_REGULATION_OF_PROTEOLYSIS	Details ...	27	-0.253704	-1.5272	0.0526316	0.552684	1	242	tags=67%, list=43%, signal=111%
GO_NEGATIVE_REGULATION_OF_CATALYTIC_ACTIVITY	GO_NEGATIVE_REGULATION_OF_CATALYTIC_ACTIVITY	Details ...	25	-0.257934	-1.51968	0.0714286	0.540823	1	88	tags=40%, list=16%, signal=45%
GO_RESPONSE_TO_METAL_ION	GO_RESPONSE_TO_METAL_ION	Details ...	15	-0.321739	-1.51095	0.0660981	0.534851	1	277	tags=80%, list=49%, signal=152%
GO_CELL_CELL_SIGNALING	GO_CELL_CELL_SIGNALING		17	-0.307059	-1.50119	0.0721063	0.531794	1	199	tags=65%, list=35%, signal=97%
GO_REGULATION_OF_RESPONSE_TO_WOUNDING	GO_REGULATION_OF_RESPONSE_TO_WOUNDING		23	-0.267343	-1.49526	0.0669371	0.520126	1	250	tags=70%, list=44%, signal=119%
GO_CARBOHYDRATE_METABOLIC_PROCESS	GO_CARBOHYDRATE_METABOLIC_PROCESS		22	-0.264053	-1.49129	0.0654397	0.506725	1	321	tags=82%, list=57%, signal=181%
GO_RESPONSE_TO_HORMONE	GO_RESPONSE_TO_HORMONE		41	-0.199713	-1.48348	0.059761	0.502177	1	297	tags=71%, list=52%, signal=138%
GO_ORGANONITROGEN_COMPOUND_BIOSYNTHETIC_PROCESS	GO_ORGANONITROGEN_COMPOUND_BIOSYNTHETIC_PROCESS		28	-0.232375	-1.43963	0.0996169	0.578918	1	382	tags=89%, list=67%, signal=260%
GO_RESPONSE_TO_ALCOHOL	GO_RESPONSE_TO_ALCOHOL		24	-0.252762	-1.43577	0.0921569	0.566184	1	289	tags=75%, list=51%, signal=146%
GO_MOVEMENT_OF_CELL_OR_SUBCELLULAR_COMPONENT	GO_MOVEMENT_OF_CELL_OR_SUBCELLULAR_COMPONENT		38	-0.201472	-1.43366	0.102767	0.549803	1	163	tags=47%, list=29%, signal=62%
GO_NEGATIVE_REGULATION_OF_CELL_PROLIFERATION	GO_NEGATIVE_REGULATION_OF_CELL_PROLIFERATION		28	-0.230519	-1.41869	0.0924025	0.564592	1	221	tags=61%, list=39%, signal=95%
GO_REGULATION_OF_PEPTIDASE_ACTIVITY	GO_REGULATION_OF_PEPTIDASE_ACTIVITY		19	-0.277564	-1.41796	0.0964083	0.547155	1	207	tags=63%, list=37%, signal=96%
GO_CARBOHYDRATE_DERIVATIVE_BIOSYNTHETIC_PROCESS	GO_CARBOHYDRATE_DERIVATIVE_BIOSYNTHETIC_PROCESS		18	-0.281421	-1.41667	0.0977012	0.531594	1	382	tags=94%, list=67%, signal=280%
GO_TAXIS	GO_TAXIS		16	-0.293103	-1.4116	0.116	0.525463	1	123	tags=50%, list=22%, signal=62%
GO_RESPONSE_TO_EXTRACELLULAR_STIMULUS	GO_RESPONSE_TO_EXTRACELLULAR_STIMULUS		31	-0.216598	-1.41155	0.100189	0.509042	1	269	tags=68%, list=47%, signal=122%
GO_ANATOMICAL_STRUCTURE_FORMATION_INVOLVED_IN_MORPHOGENESIS	GO_ANATOMICAL_STRUCTURE_FORMATION_INVOLVED_IN_MORPHOGENESIS		26	-0.23603	-1.40405	0.106383	0.508613	1	135	tags=46%, list=24%, signal=58%
GO_RESPONSE_TO_EXTERNAL_STIMULUS	GO_RESPONSE_TO_EXTERNAL_STIMULUS		80	-0.139425	-1.38909	0.111562	0.523807	1	330	tags=70%, list=58%, signal=144%
GO_REGULATION_OF_GROWTH	GO_REGULATION_OF_GROWTH		20	-0.25585	-1.38161	0.111776	0.523758	1	343	tags=85%, list=60%, signal=208%
GO_NEGATIVE_REGULATION_OF_PROTEIN_METABOLIC_PROCESS	GO_NEGATIVE_REGULATION_OF_PROTEIN_METABOLIC_PROCESS		39	-0.189103	-1.37707	0.107943	0.518722	1	221	tags=56%, list=39%, signal=86%
GO_EXTRACELLULAR_STRUCTURE_ORGANIZATION	GO_EXTRACELLULAR_STRUCTURE_ORGANIZATION		15	-0.294565	-1.36402	0.131931	0.531664	1	292	tags=80%, list=51%, signal=161%
GO_NEURON_DIFFERENTIATION	GO_NEURON_DIFFERENTIATION		25	-0.229816	-1.34958	0.14611	0.54987	1	262	tags=68%, list=46%, signal=121%
GO_REGULATION_OF_RESPONSE_TO_EXTERNAL_STIMULUS	GO_REGULATION_OF_RESPONSE_TO_EXTERNAL_STIMULUS		33	-0.203098	-1.34743	0.129098	0.540119	1	219	tags=58%, list=39%, signal=88%
GO_ORGAN_MORPHOGENESIS	GO_ORGAN_MORPHOGENESIS		28	-0.217069	-1.33037	0.134078	0.561395	1	289	tags=71%, list=51%, signal=138%
GO_PROTEIN_COMPLEX_SUBUNIT_ORGANIZATION	GO_PROTEIN_COMPLEX_SUBUNIT_ORGANIZATION		38	-0.19212	-1.32443	0.146	0.562658	1	347	tags=79%, list=61%, signal=190%
GO_TISSUE_MORPHOGENESIS	GO_TISSUE_MORPHOGENESIS		21	-0.245421	-1.31074	0.163386	0.579623	1	272	tags=71%, list=48%, signal=132%
GO_REGULATION_OF_PROTEIN_SERINE_THREONINE_KINASE_ACTIVITY	GO_REGULATION_OF_PROTEIN_SERINE_THREONINE_KINASE_ACTIVITY		16	-0.271892	-1.30183	0.158915	0.587314	1	241	tags=69%, list=43%, signal=116%
GO_CELL_DEVELOPMENT	GO_CELL_DEVELOPMENT		36	-0.190678	-1.29914	0.171004	0.580056	1	262	tags=64%, list=46%, signal=111%
GO_METAL_ION_TRANSPORT	GO_METAL_ION_TRANSPORT		20	-0.242322	-1.29233	0.176125	0.581715	1	237	tags=65%, list=42%, signal=108%
GO_CELLULAR_CHEMICAL_HOMEOSTASIS	GO_CELLULAR_CHEMICAL_HOMEOSTASIS		18	-0.254098	-1.28684	0.156701	0.581084	1	145	tags=50%, list=26%, signal=65%
GO_RHYTHMIC_PROCESS	GO_RHYTHMIC_PROCESS		18	-0.258652	-1.28655	0.160643	0.569189	1	426	tags=100%, list=75%, signal=389%
GO_REGULATION_OF_TRANSCRIPTION_FROM_RNA_POLYMERASE_II_PROMOTER	GO_REGULATION_OF_TRANSCRIPTION_FROM_RNA_POLYMERASE_II_PROMOTER		61	-0.147735	-1.28566	0.19685	0.55914	1	391	tags=82%, list=69%, signal=236%
GO_TRANSCRIPTION_FROM_RNA_POLYMERASE_II_PROMOTER	GO_TRANSCRIPTION_FROM_RNA_POLYMERASE_II_PROMOTER		17	-0.26	-1.26711	0.176591	0.586696	1	425	tags=100%, list=75%, signal=387%
GO_REGULATION_OF_NEURON_DIFFERENTIATION	GO_REGULATION_OF_NEURON_DIFFERENTIATION		23	-0.223306	-1.26642	0.16499	0.57641	1	200	tags=57%, list=35%, signal=84%
GO_GLAND_DEVELOPMENT	GO_GLAND_DEVELOPMENT		21	-0.234432	-1.2646	0.195652	0.568976	1	251	tags=67%, list=44%, signal=115%
GO_EPITHELIUM_DEVELOPMENT	GO_EPITHELIUM_DEVELOPMENT		38	-0.176152	-1.25807	0.200787	0.571329	1	251	tags=61%, list=44%, signal=101%
GO_REGULATION_OF_MAPK_CASCADE	GO_REGULATION_OF_MAPK_CASCADE		21	-0.234432	-1.25797	0.193684	0.56091	1	251	tags=67%, list=44%, signal=115%
GO_CELLULAR_AMINO_ACID_METABOLIC_PROCESS	GO_CELLULAR_AMINO_ACID_METABOLIC_PROCESS		15	-0.273551	-1.25787	0.179916	0.550704	1	417	tags=100%, list=74%, signal=368%
GO_NEGATIVE_REGULATION_OF_CELLULAR_COMPONENT_ORGANIZATION	GO_NEGATIVE_REGULATION_OF_CELLULAR_COMPONENT_ORGANIZATION		24	-0.219153	-1.25611	0.210953	0.543373	1	260	tags=67%, list=46%, signal=118%
GO_CELLULAR_RESPONSE_TO_STRESS	GO_CELLULAR_RESPONSE_TO_STRESS		54	-0.150097	-1.25603	0.2	0.534006	1	281	tags=63%, list=50%, signal=113%
GO_REGULATION_OF_CELL_CYCLE	GO_REGULATION_OF_CELL_CYCLE		35	-0.183083	-1.2533	0.187008	0.52955	1	260	tags=63%, list=46%, signal=109%
GO_RESPONSE_TO_ORGANIC_CYCLIC_COMPOUND	GO_RESPONSE_TO_ORGANIC_CYCLIC_COMPOUND		46	-0.16006	-1.25162	0.2	0.52425	1	386	tags=83%, list=68%, signal=238%
GO_REGULATION_OF_KINASE_ACTIVITY	GO_REGULATION_OF_KINASE_ACTIVITY		25	-0.213063	-1.25155	0.18254	0.515511	1	135	tags=44%, list=24%, signal=55%
GO_CELLULAR_COMPONENT_MORPHOGENESIS	GO_CELLULAR_COMPONENT_MORPHOGENESIS		22	-0.222936	-1.22198	0.240987	0.562931	1	163	tags=50%, list=29%, signal=67%
GO_RESPONSE_TO_INORGANIC_SUBSTANCE	GO_RESPONSE_TO_INORGANIC_SUBSTANCE		20	-0.236837	-1.22032	0.202783	0.556719	1	240	tags=65%, list=42%, signal=109%
GO_CELL_DEATH	GO_CELL_DEATH		36	-0.178908	-1.21625	0.24031	0.555621	1	410	tags=89%, list=72%, signal=301%
GO_SINGLE_ORGANISM_BIOSYNTHETIC_PROCESS	GO_SINGLE_ORGANISM_BIOSYNTHETIC_PROCESS		56	-0.140166	-1.21236	0.194231	0.55495	1	385	tags=80%, list=68%, signal=226%
GO_CATION_TRANSPORT	GO_CATION_TRANSPORT		26	-0.20873	-1.20959	0.22869	0.551436	1	237	tags=62%, list=42%, signal=101%
GO_REPRODUCTION	GO_REPRODUCTION		40	-0.168501	-1.20862	0.227451	0.544903	1	139	tags=40%, list=25%, signal=49%
GO_EPITHELIAL_CELL_DIFFERENTIATION	GO_EPITHELIAL_CELL_DIFFERENTIATION		20	-0.229068	-1.19013	0.235756	0.572476	1	386	tags=90%, list=68%, signal=272%
GO_POSITIVE_REGULATION_OF_TRANSCRIPTION_FROM_RNA_POLYMERASE_II_PROMOTER	GO_POSITIVE_REGULATION_OF_TRANSCRIPTION_FROM_RNA_POLYMERASE_II_PROMOTER		35	-0.174436	-1.1896	0.238776	0.565047	1	378	tags=83%, list=67%, signal=233%
GO_NEGATIVE_REGULATION_OF_NITROGEN_COMPOUND_METABOLIC_PROCESS	GO_NEGATIVE_REGULATION_OF_NITROGEN_COMPOUND_METABOLIC_PROCESS		51	-0.149111	-1.18958	0.235417	0.556816	1	391	tags=82%, list=69%, signal=241%
GO_ACTIN_FILAMENT_BASED_PROCESS	GO_ACTIN_FILAMENT_BASED_PROCESS		18	-0.242259	-1.18481	0.244306	0.557995	1	309	tags=78%, list=54%, signal=166%
GO_GAMETE_GENERATION	GO_GAMETE_GENERATION		18	-0.234062	-1.16435	0.277895	0.590451	1	93	tags=39%, list=16%, signal=45%
GO_CELL_PROJECTION_ORGANIZATION	GO_CELL_PROJECTION_ORGANIZATION		21	-0.214286	-1.15991	0.256303	0.590657	1	262	tags=67%, list=46%, signal=119%
GO_RESPONSE_TO_ENDOGENOUS_STIMULUS	GO_RESPONSE_TO_ENDOGENOUS_STIMULUS		65	-0.130892	-1.15842	0.254403	0.585663	1	354	tags=74%, list=62%, signal=174%
GO_EMBRYONIC_ORGAN_DEVELOPMENT	GO_EMBRYONIC_ORGAN_DEVELOPMENT		19	-0.222532	-1.15739	0.270751	0.579757	1	267	tags=68%, list=47%, signal=125%
GO_REGULATION_OF_INFLAMMATORY_RESPONSE	GO_REGULATION_OF_INFLAMMATORY_RESPONSE		15	-0.252899	-1.15547	0.269231	0.575757	1	315	tags=80%, list=56%, signal=175%
GO_ORGANIC_ACID_METABOLIC_PROCESS	GO_ORGANIC_ACID_METABOLIC_PROCESS		51	-0.143981	-1.12747	0.310924	0.623067	1	427	tags=88%, list=75%, signal=325%
GO_NEGATIVE_REGULATION_OF_DEVELOPMENTAL_PROCESS	GO_NEGATIVE_REGULATION_OF_DEVELOPMENTAL_PROCESS		31	-0.177239	-1.12498	0.282946	0.619938	1	473	tags=100%, list=83%, signal=570%
GO_SEXUAL_REPRODUCTION	GO_SEXUAL_REPRODUCTION		19	-0.213312	-1.12454	0.301344	0.612613	1	93	tags=37%, list=16%, signal=43%
GO_CELL_PROLIFERATION	GO_CELL_PROLIFERATION		26	-0.182852	-1.1024	0.324597	0.649501	1	251	tags=62%, list=44%, signal=105%
GO_PROTEIN_COMPLEX_BIOGENESIS	GO_PROTEIN_COMPLEX_BIOGENESIS		27	-0.181481	-1.10148	0.291837	0.64321	1	260	tags=63%, list=46%, signal=111%
GO_NEGATIVE_REGULATION_OF_TRANSPORT	GO_NEGATIVE_REGULATION_OF_TRANSPORT		17	-0.225882	-1.09868	0.342967	0.641403	1	277	tags=71%, list=49%, signal=134%
GO_RESPONSE_TO_LIPID	GO_RESPONSE_TO_LIPID		47	-0.138912	-1.09241	0.338877	0.646658	1	351	tags=74%, list=62%, signal=179%
GO_POSITIVE_REGULATION_OF_INTRACELLULAR_SIGNAL_TRANSDUCTION	GO_POSITIVE_REGULATION_OF_INTRACELLULAR_SIGNAL_TRANSDUCTION		37	-0.153697	-1.08801	0.31643	0.64767	1	272	tags=62%, list=48%, signal=112%
GO_REGULATION_OF_CELL_PROLIFERATION	GO_REGULATION_OF_CELL_PROLIFERATION		55	-0.134091	-1.08698	0.328657	0.642171	1	221	tags=51%, list=39%, signal=75%
GO_FATTY_ACID_METABOLIC_PROCESS	GO_FATTY_ACID_METABOLIC_PROCESS		18	-0.218579	-1.08535	0.319608	0.637507	1	385	tags=89%, list=68%, signal=268%
GO_INTRACELLULAR_SIGNAL_TRANSDUCTION	GO_INTRACELLULAR_SIGNAL_TRANSDUCTION		55	-0.12919	-1.08461	0.365904	0.631367	1	440	tags=89%, list=78%, signal=359%
GO_NEGATIVE_REGULATION_OF_CELL_DIFFERENTIATION	GO_NEGATIVE_REGULATION_OF_CELL_DIFFERENTIATION		28	-0.176252	-1.0838	0.345865	0.625385	1	473	tags=100%, list=83%, signal=573%
GO_REGULATION_OF_CELL_DIFFERENTIATION	GO_REGULATION_OF_CELL_DIFFERENTIATION		61	-0.125769	-1.08099	0.357294	0.623504	1	430	tags=87%, list=76%, signal=321%
GO_RESPONSE_TO_OXYGEN_CONTAINING_COMPOUND	GO_RESPONSE_TO_OXYGEN_CONTAINING_COMPOUND		66	-0.11849	-1.07543	0.349057	0.627808	1	354	tags=73%, list=62%, signal=171%
GO_NEGATIVE_REGULATION_OF_CELL_DEVELOPMENT	GO_NEGATIVE_REGULATION_OF_CELL_DEVELOPMENT		16	-0.217672	-1.05675	0.372951	0.656482	1	200	tags=56%, list=35%, signal=84%
GO_RESPONSE_TO_NITROGEN_COMPOUND	GO_RESPONSE_TO_NITROGEN_COMPOUND		47	-0.133142	-1.04085	0.38171	0.681154	1	354	tags=74%, list=62%, signal=182%
GO_POSITIVE_REGULATION_OF_GENE_EXPRESSION	GO_POSITIVE_REGULATION_OF_GENE_EXPRESSION		53	-0.125138	-1.03939	0.409901	0.676395	1	386	tags=79%, list=68%, signal=225%
GO_EMBRYO_DEVELOPMENT	GO_EMBRYO_DEVELOPMENT		28	-0.164657	-1.02874	0.412955	0.690561	1	378	tags=82%, list=67%, signal=234%
GO_SULFUR_COMPOUND_METABOLIC_PROCESS	GO_SULFUR_COMPOUND_METABOLIC_PROCESS		17	-0.207273	-1.00462	0.433538	0.731831	1	454	tags=100%, list=80%, signal=487%
GO_POSITIVE_REGULATION_OF_DEVELOPMENTAL_PROCESS	GO_POSITIVE_REGULATION_OF_DEVELOPMENTAL_PROCESS		44	-0.130975	-0.990233	0.464355	0.753219	1	216	tags=50%, list=38%, signal=75%
GO_NEGATIVE_REGULATION_OF_INTRACELLULAR_SIGNAL_TRANSDUCTION	GO_NEGATIVE_REGULATION_OF_INTRACELLULAR_SIGNAL_TRANSDUCTION		24	-0.172882	-0.989819	0.492754	0.745869	1	167	tags=46%, list=29%, signal=62%
GO_POSITIVE_REGULATION_OF_PROTEIN_METABOLIC_PROCESS	GO_POSITIVE_REGULATION_OF_PROTEIN_METABOLIC_PROCESS		42	-0.132381	-0.986145	0.459016	0.745606	1	242	tags=55%, list=43%, signal=88%
GO_HOMEOSTATIC_PROCESS	GO_HOMEOSTATIC_PROCESS		46	-0.124385	-0.979665	0.447423	0.751323	1	269	tags=59%, list=47%, signal=103%
GO_CELLULAR_RESPONSE_TO_ENDOGENOUS_STIMULUS	GO_CELLULAR_RESPONSE_TO_ENDOGENOUS_STIMULUS		41	-0.129695	-0.976222	0.465649	0.75078	1	320	tags=68%, list=56%, signal=145%
GO_MEMBRANE_ORGANIZATION	GO_MEMBRANE_ORGANIZATION		17	-0.199786	-0.969051	0.47482	0.757966	1	258	tags=65%, list=46%, signal=115%
GO_POSITIVE_REGULATION_OF_CELL_PROLIFERATION	GO_POSITIVE_REGULATION_OF_CELL_PROLIFERATION		33	-0.145727	-0.956611	0.477733	0.775012	1	473	tags=97%, list=83%, signal=551%
GO_REGULATION_OF_PHOSPHORUS_METABOLIC_PROCESS	GO_REGULATION_OF_PHOSPHORUS_METABOLIC_PROCESS		47	-0.122422	-0.954125	0.493776	0.772069	1	251	tags=55%, list=44%, signal=91%
GO_RESPONSE_TO_GROWTH_FACTOR	GO_RESPONSE_TO_GROWTH_FACTOR		24	-0.167357	-0.951833	0.483431	0.76873	1	170	tags=46%, list=30%, signal=63%
GO_ENDOCYTOSIS	GO_ENDOCYTOSIS		18	-0.189435	-0.945438	0.494094	0.774574	1	23	tags=22%, list=4%, signal=22%
GO_BIOLOGICAL_ADHESION	GO_BIOLOGICAL_ADHESION		37	-0.135492	-0.944407	0.499006	0.769279	1	251	tags=57%, list=44%, signal=95%
GO_CELLULAR_RESPONSE_TO_HORMONE_STIMULUS	GO_CELLULAR_RESPONSE_TO_HORMONE_STIMULUS		25	-0.16524	-0.941812	0.509434	0.767165	1	297	tags=68%, list=52%, signal=137%
GO_REGULATION_OF_CELL_CYCLE_PROCESS	GO_REGULATION_OF_CELL_CYCLE_PROCESS		21	-0.172161	-0.936902	0.489919	0.769375	1	258	tags=62%, list=46%, signal=109%
GO_NEUROGENESIS	GO_NEUROGENESIS		46	-0.118626	-0.935594	0.507605	0.764842	1	272	tags=59%, list=48%, signal=104%
GO_RESPONSE_TO_DRUG	GO_RESPONSE_TO_DRUG		18	-0.185792	-0.934515	0.524752	0.759852	1	277	tags=67%, list=49%, signal=126%
GO_RESPONSE_TO_NUTRIENT	GO_RESPONSE_TO_NUTRIENT		17	-0.19016	-0.933821	0.513944	0.753856	1	330	tags=76%, list=58%, signal=177%
GO_SMALL_MOLECULE_BIOSYNTHETIC_PROCESS	GO_SMALL_MOLECULE_BIOSYNTHETIC_PROCESS		24	-0.162983	-0.92575	0.561587	0.763093	1	385	tags=83%, list=68%, signal=249%
GO_PROTEOLYSIS	GO_PROTEOLYSIS		33	-0.140279	-0.92372	0.529301	0.760484	1	390	tags=82%, list=69%, signal=247%
GO_LOCOMOTION	GO_LOCOMOTION		36	-0.129473	-0.908126	0.527311	0.784463	1	200	tags=47%, list=35%, signal=68%
GO_CELLULAR_MACROMOLECULE_LOCALIZATION	GO_CELLULAR_MACROMOLECULE_LOCALIZATION		21	-0.168498	-0.90643	0.576998	0.78054	1	422	tags=90%, list=74%, signal=341%
GO_POSITIVE_REGULATION_OF_LOCOMOTION	GO_POSITIVE_REGULATION_OF_LOCOMOTION		15	-0.194565	-0.894797	0.591182	0.795735	1	196	tags=53%, list=35%, signal=79%
GO_ENZYME_LINKED_RECEPTOR_PROTEIN_SIGNALING_PATHWAY	GO_ENZYME_LINKED_RECEPTOR_PROTEIN_SIGNALING_PATHWAY		29	-0.142418	-0.878742	0.590909	0.820383	1	159	tags=41%, list=28%, signal=55%
GO_ION_HOMEOSTASIS	GO_ION_HOMEOSTASIS		19	-0.172877	-0.875918	0.61	0.818445	1	145	tags=42%, list=26%, signal=55%
GO_EMBRYONIC_MORPHOGENESIS	GO_EMBRYONIC_MORPHOGENESIS		18	-0.173953	-0.874679	0.60835	0.813369	1	378	tags=83%, list=67%, signal=242%
GO_RESPONSE_TO_RADIATION	GO_RESPONSE_TO_RADIATION		23	-0.157289	-0.872097	0.603696	0.811077	1	88	tags=30%, list=16%, signal=35%
GO_CENTRAL_NERVOUS_SYSTEM_DEVELOPMENT	GO_CENTRAL_NERVOUS_SYSTEM_DEVELOPMENT		26	-0.148941	-0.868311	0.629032	0.811139	1	422	tags=88%, list=74%, signal=330%
GO_REGULATION_OF_CYTOPLASMIC_TRANSPORT	GO_REGULATION_OF_CYTOPLASMIC_TRANSPORT		16	-0.186139	-0.861286	0.666667	0.816712	1	430	tags=94%, list=76%, signal=377%
GO_REGULATION_OF_MITOTIC_CELL_CYCLE	GO_REGULATION_OF_MITOTIC_CELL_CYCLE		25	-0.149816	-0.859452	0.622984	0.813311	1	260	tags=60%, list=46%, signal=106%
GO_CELLULAR_HOMEOSTASIS	GO_CELLULAR_HOMEOSTASIS		23	-0.152813	-0.855582	0.6341	0.814109	1	263	tags=61%, list=46%, signal=109%
GO_NEGATIVE_REGULATION_OF_TRANSCRIPTION_FROM_RNA_POLYMERASE_II_PROMOTER	GO_NEGATIVE_REGULATION_OF_TRANSCRIPTION_FROM_RNA_POLYMERASE_II_PROMOTER		32	-0.132126	-0.85466	0.63189	0.809092	1	391	tags=81%, list=69%, signal=247%
GO_INFLAMMATORY_RESPONSE	GO_INFLAMMATORY_RESPONSE		21	-0.155678	-0.851607	0.624498	0.808157	1	78	tags=29%, list=14%, signal=32%
GO_CELLULAR_RESPONSE_TO_ORGANIC_CYCLIC_COMPOUND	GO_CELLULAR_RESPONSE_TO_ORGANIC_CYCLIC_COMPOUND		21	-0.157509	-0.850283	0.633803	0.804125	1	455	tags=95%, list=80%, signal=464%
GO_ORGANIC_ACID_BIOSYNTHETIC_PROCESS	GO_ORGANIC_ACID_BIOSYNTHETIC_PROCESS		18	-0.169399	-0.843767	0.636	0.809145	1	412	tags=89%, list=73%, signal=315%
GO_CELLULAR_RESPONSE_TO_PEPTIDE	GO_CELLULAR_RESPONSE_TO_PEPTIDE		15	-0.17971	-0.842309	0.654618	0.805044	1	242	tags=60%, list=43%, signal=102%
GO_CELL_MOTILITY	GO_CELL_MOTILITY		29	-0.134983	-0.837593	0.67551	0.80716	1	163	tags=41%, list=29%, signal=55%
GO_CELL_CYCLE	GO_CELL_CYCLE		30	-0.130726	-0.836008	0.664062	0.803397	1	271	tags=60%, list=48%, signal=109%
GO_MACROMOLECULAR_COMPLEX_ASSEMBLY	GO_MACROMOLECULAR_COMPLEX_ASSEMBLY		34	-0.121068	-0.830638	0.657563	0.80641	1	270	tags=59%, list=48%, signal=106%
GO_REGULATION_OF_TRANSFERASE_ACTIVITY	GO_REGULATION_OF_TRANSFERASE_ACTIVITY		31	-0.125361	-0.823694	0.67319	0.811949	1	135	tags=35%, list=24%, signal=44%
GO_NEGATIVE_REGULATION_OF_CELL_DEATH	GO_NEGATIVE_REGULATION_OF_CELL_DEATH		39	-0.116113	-0.821228	0.680233	0.809845	1	434	tags=87%, list=77%, signal=346%
GO_CHEMICAL_HOMEOSTASIS	GO_CHEMICAL_HOMEOSTASIS		34	-0.122944	-0.81486	0.679463	0.815067	1	269	tags=59%, list=47%, signal=105%
GO_DEVELOPMENTAL_PROCESS_INVOLVED_IN_REPRODUCTION	GO_DEVELOPMENTAL_PROCESS_INVOLVED_IN_REPRODUCTION		17	-0.162139	-0.802179	0.691406	0.829665	1	212	tags=53%, list=37%, signal=82%
GO_REGULATION_OF_CELL_DEATH	GO_REGULATION_OF_CELL_DEATH		67	-0.0853731	-0.799614	0.697959	0.82827	1	483	tags=93%, list=85%, signal=551%
GO_VESICLE_MEDIATED_TRANSPORT	GO_VESICLE_MEDIATED_TRANSPORT		26	-0.133727	-0.789534	0.736626	0.838156	1	343	tags=73%, list=60%, signal=176%
GO_ION_TRANSMEMBRANE_TRANSPORT	GO_ION_TRANSMEMBRANE_TRANSPORT		24	-0.138122	-0.787699	0.73922	0.835002	1	304	tags=67%, list=54%, signal=138%
GO_EMBRYO_DEVELOPMENT_ENDING_IN_BIRTH_OR_EGG_HATCHING	GO_EMBRYO_DEVELOPMENT_ENDING_IN_BIRTH_OR_EGG_HATCHING		18	-0.155738	-0.774471	0.740206	0.849655	1	262	tags=61%, list=46%, signal=110%
GO_ORGANIC_HYDROXY_COMPOUND_BIOSYNTHETIC_PROCESS	GO_ORGANIC_HYDROXY_COMPOUND_BIOSYNTHETIC_PROCESS		17	-0.153262	-0.764995	0.761079	0.858223	1	417	tags=88%, list=74%, signal=324%
GO_MULTI_ORGANISM_REPRODUCTIVE_PROCESS	GO_MULTI_ORGANISM_REPRODUCTIVE_PROCESS		29	-0.119728	-0.76096	0.773513	0.857694	1	93	tags=28%, list=16%, signal=31%
GO_CARBOHYDRATE_DERIVATIVE_METABOLIC_PROCESS	GO_CARBOHYDRATE_DERIVATIVE_METABOLIC_PROCESS		30	-0.121788	-0.755948	0.786539	0.859188	1	427	tags=87%, list=75%, signal=332%
GO_RESPONSE_TO_PEPTIDE	GO_RESPONSE_TO_PEPTIDE		24	-0.133057	-0.75383	0.761341	0.855688	1	354	tags=75%, list=62%, signal=191%
GO_REGULATION_OF_CELLULAR_COMPONENT_MOVEMENT	GO_REGULATION_OF_CELLULAR_COMPONENT_MOVEMENT		29	-0.11678	-0.734027	0.799189	0.87777	1	251	tags=55%, list=44%, signal=94%
GO_REGULATION_OF_RESPONSE_TO_STRESS	GO_REGULATION_OF_RESPONSE_TO_STRESS		58	-0.0835648	-0.729117	0.816116	0.878741	1	66	tags=19%, list=12%, signal=19%
GO_TRANSMEMBRANE_TRANSPORT	GO_TRANSMEMBRANE_TRANSPORT		33	-0.108274	-0.719627	0.836935	0.886159	1	304	tags=64%, list=54%, signal=129%
GO_CELLULAR_RESPONSE_TO_NITROGEN_COMPOUND	GO_CELLULAR_RESPONSE_TO_NITROGEN_COMPOUND		25	-0.122804	-0.713405	0.844898	0.888908	1	320	tags=68%, list=56%, signal=149%
GO_POSITIVE_REGULATION_OF_CELL_DIFFERENTIATION	GO_POSITIVE_REGULATION_OF_CELL_DIFFERENTIATION		34	-0.105397	-0.705654	0.809709	0.892655	1	245	tags=53%, list=43%, signal=88%
GO_NEGATIVE_REGULATION_OF_PROTEIN_MODIFICATION_PROCESS	GO_NEGATIVE_REGULATION_OF_PROTEIN_MODIFICATION_PROCESS		22	-0.125688	-0.69766	0.839583	0.896581	1	216	tags=50%, list=38%, signal=78%
GO_REGULATION_OF_PROTEIN_MODIFICATION_PROCESS	GO_REGULATION_OF_PROTEIN_MODIFICATION_PROCESS		49	-0.0816327	-0.649824	0.896	0.944897	1	167	tags=37%, list=29%, signal=48%
GO_PROTEIN_MODIFICATION_BY_SMALL_PROTEIN_CONJUGATION_OR_REMOVAL	GO_PROTEIN_MODIFICATION_BY_SMALL_PROTEIN_CONJUGATION_OR_REMOVAL		20	-0.12468	-0.649729	0.894309	0.938678	1	273	tags=60%, list=48%, signal=112%
GO_CELLULAR_RESPONSE_TO_LIPID	GO_CELLULAR_RESPONSE_TO_LIPID		18	-0.128415	-0.630923	0.89759	0.951027	1	403	tags=83%, list=71%, signal=279%
GO_PROTEIN_UBIQUITINATION	GO_PROTEIN_UBIQUITINATION		17	-0.122888	-0.620196	0.94012	0.954334	1	367	tags=76%, list=65%, signal=210%
GO_REGULATION_OF_CELL_ADHESION	GO_REGULATION_OF_CELL_ADHESION		27	-0.101852	-0.61137	0.923848	0.95551	1	450	tags=89%, list=79%, signal=410%
GO_POSITIVE_REGULATION_OF_BIOSYNTHETIC_PROCESS	GO_POSITIVE_REGULATION_OF_BIOSYNTHETIC_PROCESS		55	-0.0690696	-0.561425	0.973025	0.983786	1	378	tags=73%, list=67%, signal=197%
GO_REGULATION_OF_CELL_CYCLE_PHASE_TRANSITION	GO_REGULATION_OF_CELL_CYCLE_PHASE_TRANSITION		16	-0.115245	-0.544103	0.97451	0.986137	1	221	tags=50%, list=39%, signal=80%
GO_RESPONSE_TO_MOLECULE_OF_BACTERIAL_ORIGIN	GO_RESPONSE_TO_MOLECULE_OF_BACTERIAL_ORIGIN		26	-0.0810465	-0.475454	0.998039	0.999955	1	88	tags=23%, list=16%, signal=26%
GO_RESPONSE_TO_BACTERIUM	GO_RESPONSE_TO_BACTERIUM		32	-0.0744159	-0.474206	0.994152	0.993835	1	351	tags=69%, list=62%, signal=170%

## Sheet: WT vs SKO liver up GO
NAME	GS<br> follow link to MSigDB	GS DETAILS	SIZE	ES	NES	NOM p-val	FDR q-val	FWER p-val	RANK AT MAX	LEADING EDGE
GO_ORGANELLE_FISSION	GO_ORGANELLE_FISSION	Details ...	41	0.478311	3.59789	0	0	0	402	tags=80%, list=34%, signal=118%
GO_CELL_CYCLE_PROCESS	GO_CELL_CYCLE_PROCESS	Details ...	70	0.319281	3.05396	0	0.000547	0.001	418	tags=66%, list=36%, signal=96%
GO_CELL_CYCLE	GO_CELL_CYCLE	Details ...	81	0.292942	2.9914	0	0.000364	0.001	418	tags=63%, list=36%, signal=91%
GO_MITOTIC_NUCLEAR_DIVISION	GO_MITOTIC_NUCLEAR_DIVISION	Details ...	32	0.450252	2.97082	0	0.000273	0.001	402	tags=78%, list=34%, signal=116%
GO_SISTER_CHROMATID_SEGREGATION	GO_SISTER_CHROMATID_SEGREGATION	Details ...	16	0.610212	2.89473	0	0.000441	0.002	393	tags=94%, list=33%, signal=139%
GO_MITOTIC_CELL_CYCLE	GO_MITOTIC_CELL_CYCLE	Details ...	53	0.340043	2.85985	0	0.000544	0.003	526	tags=77%, list=45%, signal=134%
GO_CHROMOSOME_SEGREGATION	GO_CHROMOSOME_SEGREGATION	Details ...	21	0.531037	2.82607	0	0.000466	0.003	393	tags=86%, list=33%, signal=127%
GO_ORGANIC_HYDROXY_COMPOUND_BIOSYNTHETIC_PROCESS	GO_ORGANIC_HYDROXY_COMPOUND_BIOSYNTHETIC_PROCESS	Details ...	35	0.400276	2.76257	0	0.000544	0.004	650	tags=94%, list=55%, signal=205%
GO_NUCLEAR_CHROMOSOME_SEGREGATION	GO_NUCLEAR_CHROMOSOME_SEGREGATION	Details ...	17	0.554782	2.75345	0	0.000484	0.004	393	tags=88%, list=33%, signal=131%
GO_ORGANIC_HYDROXY_COMPOUND_METABOLIC_PROCESS	GO_ORGANIC_HYDROXY_COMPOUND_METABOLIC_PROCESS	Details ...	66	0.279373	2.6197	0	0.00130758	0.012	650	tags=82%, list=55%, signal=173%
GO_MICROTUBULE_BASED_PROCESS	GO_MICROTUBULE_BASED_PROCESS	Details ...	29	0.40012	2.51296	0	0.0049289	0.05	391	tags=72%, list=33%, signal=106%
GO_POSITIVE_REGULATION_OF_CELL_CYCLE_PROCESS	GO_POSITIVE_REGULATION_OF_CELL_CYCLE_PROCESS	Details ...	18	0.490965	2.50325	0	0.00460605	0.051	475	tags=89%, list=40%, signal=147%
GO_CELL_DIVISION	GO_CELL_DIVISION	Details ...	45	0.318886	2.50196	0	0.00425174	0.051	526	tags=76%, list=45%, signal=132%
GO_SMALL_MOLECULE_BIOSYNTHETIC_PROCESS	GO_SMALL_MOLECULE_BIOSYNTHETIC_PROCESS	Details ...	59	0.278133	2.45999	0.0019685	0.00538721	0.07	644	tags=81%, list=55%, signal=171%
GO_ALCOHOL_METABOLIC_PROCESS	GO_ALCOHOL_METABOLIC_PROCESS	Details ...	48	0.296033	2.37709	0	0.00869077	0.119	644	tags=83%, list=55%, signal=177%
GO_ALCOHOL_BIOSYNTHETIC_PROCESS	GO_ALCOHOL_BIOSYNTHETIC_PROCESS	Details ...	23	0.415253	2.33966	0	0.0102347	0.143	644	tags=96%, list=55%, signal=208%
GO_COFACTOR_METABOLIC_PROCESS	GO_COFACTOR_METABOLIC_PROCESS	Details ...	41	0.309969	2.32886	0	0.0107764	0.161	650	tags=85%, list=55%, signal=185%
GO_SMALL_MOLECULE_METABOLIC_PROCESS	GO_SMALL_MOLECULE_METABOLIC_PROCESS	Details ...	167	0.16333	2.29146	0.00197628	0.0141864	0.217	650	tags=69%, list=55%, signal=133%
GO_OXIDATION_REDUCTION_PROCESS	GO_OXIDATION_REDUCTION_PROCESS	Details ...	111	0.188808	2.19771	0	0.0258067	0.369	655	tags=73%, list=56%, signal=149%
GO_REGULATION_OF_MICROTUBULE_POLYMERIZATION_OR_DEPOLYMERIZATION	GO_REGULATION_OF_MICROTUBULE_POLYMERIZATION_OR_DEPOLYMERIZATION	Details ...	17	0.437135	2.16382	0.0019802	0.0311622	0.436	391	tags=76%, list=33%, signal=113%
GO_COENZYME_METABOLIC_PROCESS	GO_COENZYME_METABOLIC_PROCESS		34	0.307327	2.11903	0.00198413	0.0394874	0.534	650	tags=85%, list=55%, signal=186%
GO_MICROTUBULE_CYTOSKELETON_ORGANIZATION	GO_MICROTUBULE_CYTOSKELETON_ORGANIZATION		23	0.36898	2.11072	0	0.0396942	0.553	391	tags=70%, list=33%, signal=102%
GO_ESTABLISHMENT_OF_LOCALIZATION_IN_CELL	GO_ESTABLISHMENT_OF_LOCALIZATION_IN_CELL		69	0.222572	2.09695	0.00408998	0.0408603	0.573	859	tags=94%, list=73%, signal=330%
GO_COENZYME_BIOSYNTHETIC_PROCESS	GO_COENZYME_BIOSYNTHETIC_PROCESS		15	0.451251	2.08517	0.00191939	0.0419616	0.597	650	tags=100%, list=55%, signal=221%
GO_COFACTOR_BIOSYNTHETIC_PROCESS	GO_COFACTOR_BIOSYNTHETIC_PROCESS		19	0.399316	2.06509	0.00798403	0.0461239	0.651	650	tags=95%, list=55%, signal=209%
GO_AMMONIUM_ION_METABOLIC_PROCESS	GO_AMMONIUM_ION_METABOLIC_PROCESS		22	0.367424	2.03503	0	0.0537851	0.715	643	tags=91%, list=55%, signal=197%
GO_NEGATIVE_REGULATION_OF_PROTEIN_COMPLEX_DISASSEMBLY	GO_NEGATIVE_REGULATION_OF_PROTEIN_COMPLEX_DISASSEMBLY		18	0.394368	2.02055	0.002079	0.0558031	0.744	391	tags=72%, list=33%, signal=107%
GO_REGULATION_OF_MICROTUBULE_BASED_PROCESS	GO_REGULATION_OF_MICROTUBULE_BASED_PROCESS		20	0.372444	1.99768	0.01	0.0618711	0.789	391	tags=70%, list=33%, signal=103%
GO_CELL_CYCLE_PHASE_TRANSITION	GO_CELL_CYCLE_PHASE_TRANSITION		25	0.335283	1.96338	0.00767754	0.0730407	0.85	506	tags=76%, list=43%, signal=131%
GO_ORGANELLE_ASSEMBLY	GO_ORGANELLE_ASSEMBLY		28	0.31638	1.94985	0.00209205	0.076523	0.877	475	tags=71%, list=40%, signal=117%
GO_REGULATION_OF_PROTEIN_COMPLEX_DISASSEMBLY	GO_REGULATION_OF_PROTEIN_COMPLEX_DISASSEMBLY		19	0.356072	1.87784	0.0116054	0.111946	0.962	391	tags=68%, list=33%, signal=101%
GO_CHROMOSOME_ORGANIZATION	GO_CHROMOSOME_ORGANIZATION		41	0.245474	1.86538	0.00795229	0.116501	0.967	494	tags=66%, list=42%, signal=110%
GO_POSITIVE_REGULATION_OF_CELL_CYCLE	GO_POSITIVE_REGULATION_OF_CELL_CYCLE		26	0.303672	1.82588	0.0182927	0.142632	0.985	418	tags=65%, list=36%, signal=99%
GO_DNA_METABOLIC_PROCESS	GO_DNA_METABOLIC_PROCESS		24	0.311449	1.81687	0.0119284	0.145428	0.988	717	tags=92%, list=61%, signal=231%
GO_ORGANONITROGEN_COMPOUND_BIOSYNTHETIC_PROCESS	GO_ORGANONITROGEN_COMPOUND_BIOSYNTHETIC_PROCESS		75	0.183743	1.80628	0.0158416	0.149363	0.992	658	tags=73%, list=56%, signal=156%
GO_CELL_CYCLE_CHECKPOINT	GO_CELL_CYCLE_CHECKPOINT		16	0.372949	1.79883	0.0184049	0.151069	0.993	521	tags=81%, list=44%, signal=144%
GO_SULFUR_COMPOUND_BIOSYNTHETIC_PROCESS	GO_SULFUR_COMPOUND_BIOSYNTHETIC_PROCESS		28	0.289267	1.78951	0.0172084	0.154568	0.995	548	tags=75%, list=47%, signal=137%
GO_REGULATION_OF_CELL_CYCLE_PROCESS	GO_REGULATION_OF_CELL_CYCLE_PROCESS		34	0.268524	1.78408	0.0215686	0.155202	0.996	418	tags=62%, list=36%, signal=93%
GO_LIPID_METABOLIC_PROCESS	GO_LIPID_METABOLIC_PROCESS		122	0.141947	1.74951	0.00596422	0.18114	0.999	658	tags=69%, list=56%, signal=140%
GO_CELLULAR_COMPONENT_DISASSEMBLY	GO_CELLULAR_COMPONENT_DISASSEMBLY		33	0.263538	1.743	0.0235294	0.18184	0.999	730	tags=88%, list=62%, signal=226%
GO_REGULATION_OF_CYTOSKELETON_ORGANIZATION	GO_REGULATION_OF_CYTOSKELETON_ORGANIZATION		41	0.228231	1.7402	0.0239521	0.179946	0.999	399	tags=56%, list=34%, signal=82%
GO_STEROL_METABOLIC_PROCESS	GO_STEROL_METABOLIC_PROCESS		20	0.318458	1.73127	0.0291262	0.183948	0.999	512	tags=75%, list=44%, signal=131%
GO_SINGLE_ORGANISM_BIOSYNTHETIC_PROCESS	GO_SINGLE_ORGANISM_BIOSYNTHETIC_PROCESS		129	0.135759	1.70807	0.0248447	0.201792	1	658	tags=68%, list=56%, signal=138%
GO_NEGATIVE_REGULATION_OF_CELL_DEATH	GO_NEGATIVE_REGULATION_OF_CELL_DEATH		72	0.175136	1.70448	0.04	0.200553	1	393	tags=50%, list=33%, signal=71%
GO_LIPID_LOCALIZATION	GO_LIPID_LOCALIZATION		25	0.283064	1.66033	0.028169	0.245968	1	566	tags=76%, list=48%, signal=144%
GO_RESPONSE_TO_MECHANICAL_STIMULUS	GO_RESPONSE_TO_MECHANICAL_STIMULUS		20	0.299567	1.64062	0.042	0.264664	1	299	tags=55%, list=25%, signal=73%
GO_NEGATIVE_REGULATION_OF_CYTOSKELETON_ORGANIZATION	GO_NEGATIVE_REGULATION_OF_CYTOSKELETON_ORGANIZATION		25	0.271889	1.63664	0.045082	0.263791	1	391	tags=60%, list=33%, signal=88%
GO_CELLULAR_RESPONSE_TO_STRESS	GO_CELLULAR_RESPONSE_TO_STRESS		97	0.146206	1.63174	0.0327869	0.263929	1	483	tags=55%, list=41%, signal=85%
GO_COGNITION	GO_COGNITION		16	0.342617	1.6177	0.0489237	0.276428	1	336	tags=63%, list=29%, signal=86%
GO_ESTABLISHMENT_OF_PROTEIN_LOCALIZATION	GO_ESTABLISHMENT_OF_PROTEIN_LOCALIZATION		68	0.169211	1.59929	0.0480769	0.295221	1	865	tags=90%, list=74%, signal=321%
GO_NEGATIVE_REGULATION_OF_ORGANELLE_ORGANIZATION	GO_NEGATIVE_REGULATION_OF_ORGANELLE_ORGANIZATION		34	0.229876	1.56879	0.0379242	0.333672	1	393	tags=56%, list=33%, signal=82%
GO_FATTY_ACID_METABOLIC_PROCESS	GO_FATTY_ACID_METABOLIC_PROCESS		29	0.244662	1.55633	0.056	0.346904	1	569	tags=72%, list=48%, signal=137%
GO_CELLULAR_LIPID_METABOLIC_PROCESS	GO_CELLULAR_LIPID_METABOLIC_PROCESS		96	0.136982	1.54832	0.0656064	0.35363	1	634	tags=67%, list=54%, signal=133%
GO_CELL_DEATH	GO_CELL_DEATH		75	0.157489	1.54508	0.0654762	0.35238	1	906	tags=92%, list=77%, signal=377%
GO_REGULATION_OF_MITOTIC_CELL_CYCLE	GO_REGULATION_OF_MITOTIC_CELL_CYCLE		33	0.225188	1.54492	0.0609756	0.346148	1	418	tags=58%, list=36%, signal=87%
GO_CATABOLIC_PROCESS	GO_CATABOLIC_PROCESS		130	0.121338	1.53806	0.0526316	0.350636	1	658	tags=67%, list=56%, signal=135%
GO_INTERSPECIES_INTERACTION_BETWEEN_ORGANISMS	GO_INTERSPECIES_INTERACTION_BETWEEN_ORGANISMS		33	0.230101	1.53255	0.0590551	0.353317	1	697	tags=82%, list=59%, signal=196%
GO_INTRACELLULAR_PROTEIN_TRANSPORT	GO_INTRACELLULAR_PROTEIN_TRANSPORT		23	0.269255	1.53171	0.062753	0.348699	1	761	tags=91%, list=65%, signal=254%
GO_RESPONSE_TO_RADIATION	GO_RESPONSE_TO_RADIATION		28	0.245201	1.52161	0.0695825	0.358373	1	305	tags=50%, list=26%, signal=66%
GO_MODULATION_OF_SYNAPTIC_TRANSMISSION	GO_MODULATION_OF_SYNAPTIC_TRANSMISSION		19	0.289269	1.51636	0.0711382	0.360926	1	221	tags=47%, list=19%, signal=57%
GO_REGULATION_OF_ORGANELLE_ORGANIZATION	GO_REGULATION_OF_ORGANELLE_ORGANIZATION		73	0.155164	1.51403	0.0714286	0.358784	1	970	tags=97%, list=83%, signal=525%
GO_STEROID_METABOLIC_PROCESS	GO_STEROID_METABOLIC_PROCESS		32	0.226084	1.49388	0.0820734	0.385744	1	658	tags=78%, list=56%, signal=173%
GO_NEGATIVE_REGULATION_OF_APOPTOTIC_SIGNALING_PATHWAY	GO_NEGATIVE_REGULATION_OF_APOPTOTIC_SIGNALING_PATHWAY		18	0.298827	1.48729	0.0764463	0.391358	1	371	tags=61%, list=32%, signal=88%
GO_NEGATIVE_REGULATION_OF_DEFENSE_RESPONSE	GO_NEGATIVE_REGULATION_OF_DEFENSE_RESPONSE		15	0.308772	1.47898	0.0725806	0.399553	1	189	tags=47%, list=16%, signal=55%
GO_CELLULAR_RESPONSE_TO_DNA_DAMAGE_STIMULUS	GO_CELLULAR_RESPONSE_TO_DNA_DAMAGE_STIMULUS		30	0.227739	1.46964	0.076	0.408557	1	482	tags=63%, list=41%, signal=105%
GO_POSITIVE_REGULATION_OF_MITOTIC_CELL_CYCLE	GO_POSITIVE_REGULATION_OF_MITOTIC_CELL_CYCLE		15	0.31159	1.45962	0.0877863	0.420149	1	264	tags=53%, list=22%, signal=68%
GO_MACROAUTOPHAGY	GO_MACROAUTOPHAGY		17	0.297219	1.45726	0.0730769	0.417581	1	691	tags=88%, list=59%, signal=211%
GO_DNA_CONFORMATION_CHANGE	GO_DNA_CONFORMATION_CHANGE		16	0.310125	1.45703	0.0729167	0.411665	1	447	tags=69%, list=38%, signal=110%
GO_REGULATION_OF_NUCLEOTIDE_METABOLIC_PROCESS	GO_REGULATION_OF_NUCLEOTIDE_METABOLIC_PROCESS		18	0.288927	1.44533	0.0801603	0.42639	1	839	tags=100%, list=71%, signal=345%
GO_LIPID_BIOSYNTHETIC_PROCESS	GO_LIPID_BIOSYNTHETIC_PROCESS		60	0.163704	1.43203	0.111984	0.444425	1	658	tags=72%, list=56%, signal=155%
GO_RESPONSE_TO_OXYGEN_LEVELS	GO_RESPONSE_TO_OXYGEN_LEVELS		32	0.212894	1.42442	0.0901961	0.452521	1	563	tags=69%, list=48%, signal=128%
GO_RESPONSE_TO_TUMOR_NECROSIS_FACTOR	GO_RESPONSE_TO_TUMOR_NECROSIS_FACTOR		15	0.304976	1.41508	0.109053	0.464257	1	663	tags=87%, list=56%, signal=197%
GO_PHOSPHATE_CONTAINING_COMPOUND_METABOLIC_PROCESS	GO_PHOSPHATE_CONTAINING_COMPOUND_METABOLIC_PROCESS		150	0.105065	1.40855	0.0998004	0.470563	1	768	tags=75%, list=65%, signal=188%
GO_AUTOPHAGY	GO_AUTOPHAGY		20	0.265078	1.40825	0.103734	0.464727	1	691	tags=85%, list=59%, signal=203%
GO_RESPONSE_TO_ABIOTIC_STIMULUS	GO_RESPONSE_TO_ABIOTIC_STIMULUS		78	0.14002	1.40617	0.10495	0.462261	1	568	tags=62%, list=48%, signal=111%
GO_REGULATION_OF_CHROMOSOME_ORGANIZATION	GO_REGULATION_OF_CHROMOSOME_ORGANIZATION		16	0.290155	1.4004	0.101215	0.466574	1	837	tags=100%, list=71%, signal=344%
GO_NEGATIVE_REGULATION_OF_MITOTIC_CELL_CYCLE	GO_NEGATIVE_REGULATION_OF_MITOTIC_CELL_CYCLE		16	0.285946	1.39258	0.0959184	0.475915	1	475	tags=69%, list=40%, signal=114%
GO_MEMBRANE_ORGANIZATION	GO_MEMBRANE_ORGANIZATION		55	0.16375	1.38874	0.110638	0.477064	1	819	tags=85%, list=70%, signal=269%
GO_PHOSPHOLIPID_METABOLIC_PROCESS	GO_PHOSPHOLIPID_METABOLIC_PROCESS		42	0.180717	1.38759	0.10998	0.473211	1	633	tags=71%, list=54%, signal=149%
GO_AMINE_METABOLIC_PROCESS	GO_AMINE_METABOLIC_PROCESS		17	0.279018	1.38401	0.11332	0.474708	1	643	tags=82%, list=55%, signal=179%
GO_PROTEIN_MODIFICATION_BY_SMALL_PROTEIN_CONJUGATION_OR_REMOVAL	GO_PROTEIN_MODIFICATION_BY_SMALL_PROTEIN_CONJUGATION_OR_REMOVAL		37	0.193634	1.37843	0.113462	0.479281	1	699	tags=78%, list=60%, signal=188%
GO_CELLULAR_CHEMICAL_HOMEOSTASIS	GO_CELLULAR_CHEMICAL_HOMEOSTASIS		43	0.184031	1.37331	0.138943	0.483267	1	255	tags=40%, list=22%, signal=49%
GO_ORGANELLE_DISASSEMBLY	GO_ORGANELLE_DISASSEMBLY		16	0.289508	1.3684	0.0993915	0.486964	1	691	tags=88%, list=59%, signal=210%
GO_NEGATIVE_REGULATION_OF_CELL_CYCLE_PROCESS	GO_NEGATIVE_REGULATION_OF_CELL_CYCLE_PROCESS		16	0.285946	1.36586	0.118026	0.4861	1	475	tags=69%, list=40%, signal=114%
GO_CELLULAR_RESPONSE_TO_OXYGEN_LEVELS	GO_CELLULAR_RESPONSE_TO_OXYGEN_LEVELS		16	0.284542	1.36575	0.121849	0.480506	1	550	tags=75%, list=47%, signal=139%
GO_CELLULAR_HOMEOSTASIS	GO_CELLULAR_HOMEOSTASIS		51	0.166204	1.36162	0.111111	0.483951	1	572	tags=65%, list=49%, signal=121%
GO_NUCLEOBASE_CONTAINING_SMALL_MOLECULE_METABOLIC_PROCESS	GO_NUCLEOBASE_CONTAINING_SMALL_MOLECULE_METABOLIC_PROCESS		35	0.195309	1.35009	0.120858	0.500951	1	917	tags=97%, list=78%, signal=431%
GO_MITOCHONDRION_ORGANIZATION	GO_MITOCHONDRION_ORGANIZATION		32	0.20567	1.34526	0.148008	0.505297	1	718	tags=81%, list=61%, signal=203%
GO_POSITIVE_REGULATION_OF_ORGANELLE_ORGANIZATION	GO_POSITIVE_REGULATION_OF_ORGANELLE_ORGANIZATION		37	0.19197	1.33737	0.122951	0.515463	1	923	tags=97%, list=79%, signal=441%
GO_ORGANOPHOSPHATE_METABOLIC_PROCESS	GO_ORGANOPHOSPHATE_METABOLIC_PROCESS		78	0.133867	1.33477	0.143434	0.514325	1	650	tags=68%, list=55%, signal=142%
GO_REGULATION_OF_CELL_CYCLE_PHASE_TRANSITION	GO_REGULATION_OF_CELL_CYCLE_PHASE_TRANSITION		20	0.248787	1.32641	0.144161	0.525586	1	475	tags=65%, list=40%, signal=107%
GO_ORGANIC_ACID_BIOSYNTHETIC_PROCESS	GO_ORGANIC_ACID_BIOSYNTHETIC_PROCESS		29	0.209306	1.31827	0.145038	0.53674	1	569	tags=69%, list=48%, signal=131%
GO_REGULATION_OF_NEURON_DEATH	GO_REGULATION_OF_NEURON_DEATH		21	0.238673	1.3104	0.166333	0.547233	1	786	tags=90%, list=67%, signal=269%
GO_SULFUR_COMPOUND_METABOLIC_PROCESS	GO_SULFUR_COMPOUND_METABOLIC_PROCESS		48	0.163928	1.30962	0.154	0.543086	1	646	tags=71%, list=55%, signal=151%
GO_ORGANONITROGEN_COMPOUND_METABOLIC_PROCESS	GO_ORGANONITROGEN_COMPOUND_METABOLIC_PROCESS		145	0.0991991	1.30514	0.155303	0.546552	1	658	tags=65%, list=56%, signal=129%
GO_NITROGEN_COMPOUND_TRANSPORT	GO_NITROGEN_COMPOUND_TRANSPORT		34	0.187203	1.29986	0.141079	0.551693	1	856	tags=91%, list=73%, signal=327%
GO_MONOCARBOXYLIC_ACID_METABOLIC_PROCESS	GO_MONOCARBOXYLIC_ACID_METABOLIC_PROCESS		56	0.146467	1.29331	0.161224	0.559782	1	569	tags=63%, list=48%, signal=115%
GO_POSITIVE_REGULATION_OF_CELLULAR_COMPONENT_BIOGENESIS	GO_POSITIVE_REGULATION_OF_CELLULAR_COMPONENT_BIOGENESIS		32	0.190182	1.29009	0.172764	0.560552	1	112	tags=28%, list=10%, signal=30%
GO_ANION_TRANSPORT	GO_ANION_TRANSPORT		42	0.170789	1.28988	0.142276	0.555248	1	197	tags=33%, list=17%, signal=39%
GO_MULTI_ORGANISM_REPRODUCTIVE_PROCESS	GO_MULTI_ORGANISM_REPRODUCTIVE_PROCESS		41	0.170366	1.28648	0.176238	0.557267	1	665	tags=73%, list=57%, signal=163%
GO_REGULATION_OF_CELLULAR_PROTEIN_CATABOLIC_PROCESS	GO_REGULATION_OF_CELLULAR_PROTEIN_CATABOLIC_PROCESS		17	0.261884	1.28192	0.197674	0.561637	1	870	tags=100%, list=74%, signal=381%
GO_POSITIVE_REGULATION_OF_CELLULAR_PROTEIN_LOCALIZATION	GO_POSITIVE_REGULATION_OF_CELLULAR_PROTEIN_LOCALIZATION		24	0.223768	1.2747	0.176923	0.571627	1	720	tags=83%, list=61%, signal=211%
GO_REGULATION_OF_CELL_DEATH	GO_REGULATION_OF_CELL_DEATH		122	0.104111	1.27226	0.178645	0.571606	1	948	tags=90%, list=81%, signal=420%
GO_PROTEIN_COMPLEX_SUBUNIT_ORGANIZATION	GO_PROTEIN_COMPLEX_SUBUNIT_ORGANIZATION		95	0.111507	1.26758	0.169261	0.576146	1	373	tags=42%, list=32%, signal=57%
GO_INORGANIC_ION_TRANSMEMBRANE_TRANSPORT	GO_INORGANIC_ION_TRANSMEMBRANE_TRANSPORT		32	0.19051	1.26695	0.177062	0.572047	1	185	tags=34%, list=16%, signal=40%
GO_REGULATION_OF_CELL_DIVISION	GO_REGULATION_OF_CELL_DIVISION		26	0.207451	1.26354	0.188755	0.573789	1	393	tags=54%, list=33%, signal=79%
GO_REGULATION_OF_PROTEIN_MODIFICATION_BY_SMALL_PROTEIN_CONJUGATION_OR_REMOVAL	GO_REGULATION_OF_PROTEIN_MODIFICATION_BY_SMALL_PROTEIN_CONJUGATION_OR_REMOVAL		17	0.256342	1.25839	0.186583	0.579699	1	393	tags=59%, list=33%, signal=87%
GO_ION_TRANSPORT	GO_ION_TRANSPORT		86	0.119143	1.25735	0.168699	0.576538	1	197	tags=28%, list=17%, signal=31%
GO_RESPONSE_TO_TEMPERATURE_STIMULUS	GO_RESPONSE_TO_TEMPERATURE_STIMULUS		18	0.251922	1.25497	0.208577	0.576472	1	360	tags=56%, list=31%, signal=79%
GO_NEGATIVE_REGULATION_OF_NEURON_APOPTOTIC_PROCESS	GO_NEGATIVE_REGULATION_OF_NEURON_APOPTOTIC_PROCESS		16	0.255073	1.25049	0.186992	0.580183	1	364	tags=56%, list=31%, signal=80%
GO_REGULATION_OF_CYSTEINE_TYPE_ENDOPEPTIDASE_ACTIVITY	GO_REGULATION_OF_CYSTEINE_TYPE_ENDOPEPTIDASE_ACTIVITY		15	0.264423	1.24788	0.206122	0.580154	1	710	tags=87%, list=60%, signal=216%
GO_REGULATION_OF_I_KAPPAB_KINASE_NF_KAPPAB_SIGNALING	GO_REGULATION_OF_I_KAPPAB_KINASE_NF_KAPPAB_SIGNALING		24	0.214203	1.24378	0.199219	0.58307	1	731	tags=83%, list=62%, signal=216%
GO_ORGANIC_ACID_TRANSPORT	GO_ORGANIC_ACID_TRANSPORT		27	0.206465	1.24209	0.198459	0.581459	1	197	tags=37%, list=17%, signal=43%
GO_STEROID_BIOSYNTHETIC_PROCESS	GO_STEROID_BIOSYNTHETIC_PROCESS		22	0.227588	1.24095	0.207243	0.578617	1	644	tags=77%, list=55%, signal=168%
GO_DIVALENT_INORGANIC_CATION_HOMEOSTASIS	GO_DIVALENT_INORGANIC_CATION_HOMEOSTASIS		18	0.245867	1.23646	0.216162	0.583401	1	367	tags=56%, list=31%, signal=80%
GO_NEGATIVE_REGULATION_OF_RESPONSE_TO_WOUNDING	GO_NEGATIVE_REGULATION_OF_RESPONSE_TO_WOUNDING		18	0.24308	1.23491	0.206693	0.581738	1	305	tags=50%, list=26%, signal=67%
GO_CELLULAR_CARBOHYDRATE_METABOLIC_PROCESS	GO_CELLULAR_CARBOHYDRATE_METABOLIC_PROCESS		19	0.233949	1.23254	0.184762	0.581645	1	841	tags=95%, list=72%, signal=329%
GO_POSITIVE_REGULATION_OF_CATALYTIC_ACTIVITY	GO_POSITIVE_REGULATION_OF_CATALYTIC_ACTIVITY		94	0.111111	1.2322	0.192469	0.577401	1	466	tags=50%, list=40%, signal=76%
GO_ENDOMEMBRANE_SYSTEM_ORGANIZATION	GO_ENDOMEMBRANE_SYSTEM_ORGANIZATION		32	0.184654	1.22558	0.221416	0.586181	1	742	tags=81%, list=63%, signal=215%
GO_NEGATIVE_REGULATION_OF_RESPONSE_TO_EXTERNAL_STIMULUS	GO_NEGATIVE_REGULATION_OF_RESPONSE_TO_EXTERNAL_STIMULUS		26	0.205441	1.2212	0.206061	0.590635	1	305	tags=46%, list=26%, signal=61%
GO_CELLULAR_RESPONSE_TO_LIPID	GO_CELLULAR_RESPONSE_TO_LIPID		36	0.172134	1.21907	0.226695	0.590679	1	651	tags=72%, list=55%, signal=157%
GO_CELLULAR_CATABOLIC_PROCESS	GO_CELLULAR_CATABOLIC_PROCESS		90	0.114084	1.21735	0.213389	0.589225	1	658	tags=67%, list=56%, signal=140%
GO_REGULATION_OF_MULTI_ORGANISM_PROCESS	GO_REGULATION_OF_MULTI_ORGANISM_PROCESS		30	0.184965	1.21388	0.220339	0.591164	1	844	tags=90%, list=72%, signal=312%
GO_REGULATION_OF_CELLULAR_COMPONENT_SIZE	GO_REGULATION_OF_CELLULAR_COMPONENT_SIZE		26	0.200549	1.21306	0.202627	0.587764	1	130	tags=31%, list=11%, signal=34%
GO_REGULATION_OF_SYMBIOSIS_ENCOMPASSING_MUTUALISM_THROUGH_PARASITISM	GO_REGULATION_OF_SYMBIOSIS_ENCOMPASSING_MUTUALISM_THROUGH_PARASITISM		15	0.257751	1.21235	0.223507	0.584675	1	796	tags=93%, list=68%, signal=286%
GO_NEGATIVE_REGULATION_OF_CELLULAR_COMPONENT_ORGANIZATION	GO_NEGATIVE_REGULATION_OF_CELLULAR_COMPONENT_ORGANIZATION		58	0.136664	1.20881	0.230315	0.587387	1	393	tags=47%, list=33%, signal=67%
GO_ORGANIC_ANION_TRANSPORT	GO_ORGANIC_ANION_TRANSPORT		33	0.181579	1.20407	0.223124	0.592615	1	112	tags=27%, list=10%, signal=29%
GO_REGULATION_OF_METAL_ION_TRANSPORT	GO_REGULATION_OF_METAL_ION_TRANSPORT		18	0.235582	1.20342	0.207585	0.5893	1	705	tags=83%, list=60%, signal=205%
GO_SMALL_GTPASE_MEDIATED_SIGNAL_TRANSDUCTION	GO_SMALL_GTPASE_MEDIATED_SIGNAL_TRANSDUCTION		16	0.251727	1.20075	0.229572	0.590208	1	588	tags=75%, list=50%, signal=148%
GO_PROTEIN_LOCALIZATION_TO_ORGANELLE	GO_PROTEIN_LOCALIZATION_TO_ORGANELLE		20	0.221231	1.19505	0.239089	0.597668	1	859	tags=95%, list=73%, signal=348%
GO_NEUROLOGICAL_SYSTEM_PROCESS	GO_NEUROLOGICAL_SYSTEM_PROCESS		41	0.159559	1.19087	0.260038	0.602043	1	305	tags=41%, list=26%, signal=54%
GO_AGING	GO_AGING		26	0.193246	1.18354	0.256311	0.612878	1	906	tags=96%, list=77%, signal=412%
GO_CELLULAR_RESPONSE_TO_ABIOTIC_STIMULUS	GO_CELLULAR_RESPONSE_TO_ABIOTIC_STIMULUS		16	0.247086	1.18162	0.237817	0.612168	1	520	tags=69%, list=44%, signal=122%
GO_REGULATION_OF_PROTEIN_LOCALIZATION	GO_REGULATION_OF_PROTEIN_LOCALIZATION		63	0.127941	1.17525	0.272921	0.620776	1	360	tags=43%, list=31%, signal=58%
GO_CYTOSKELETON_ORGANIZATION	GO_CYTOSKELETON_ORGANIZATION		63	0.129584	1.17516	0.240426	0.616354	1	265	tags=35%, list=23%, signal=43%
GO_NEGATIVE_REGULATION_OF_NEURON_DEATH	GO_NEGATIVE_REGULATION_OF_NEURON_DEATH		17	0.240073	1.16438	0.281496	0.633904	1	619	tags=76%, list=53%, signal=159%
GO_REGULATION_OF_PEPTIDE_TRANSPORT	GO_REGULATION_OF_PEPTIDE_TRANSPORT		20	0.216638	1.15847	0.271484	0.641757	1	336	tags=50%, list=29%, signal=69%
GO_RESPONSE_TO_ESTROGEN	GO_RESPONSE_TO_ESTROGEN		26	0.191102	1.15501	0.260776	0.644659	1	773	tags=85%, list=66%, signal=242%
GO_DIVALENT_INORGANIC_CATION_TRANSPORT	GO_DIVALENT_INORGANIC_CATION_TRANSPORT		16	0.238666	1.14501	0.296146	0.661483	1	383	tags=56%, list=33%, signal=82%
GO_SEXUAL_REPRODUCTION	GO_SEXUAL_REPRODUCTION		30	0.174359	1.14282	0.3125	0.661285	1	230	tags=37%, list=20%, signal=44%
GO_REGULATION_OF_CATABOLIC_PROCESS	GO_REGULATION_OF_CATABOLIC_PROCESS		42	0.151102	1.14275	0.294574	0.656776	1	974	tags=98%, list=83%, signal=553%
GO_RESPONSE_TO_DRUG	GO_RESPONSE_TO_DRUG		45	0.147938	1.14085	0.282306	0.656097	1	719	tags=76%, list=61%, signal=187%
GO_CELLULAR_HORMONE_METABOLIC_PROCESS	GO_CELLULAR_HORMONE_METABOLIC_PROCESS		15	0.24176	1.1394	0.297087	0.654955	1	658	tags=80%, list=56%, signal=180%
GO_ORGANOPHOSPHATE_BIOSYNTHETIC_PROCESS	GO_ORGANOPHOSPHATE_BIOSYNTHETIC_PROCESS		46	0.146893	1.13886	0.272374	0.651609	1	650	tags=70%, list=55%, signal=150%
GO_MALE_GAMETE_GENERATION	GO_MALE_GAMETE_GENERATION		20	0.211092	1.13716	0.280164	0.650646	1	225	tags=40%, list=19%, signal=49%
GO_PLASMA_MEMBRANE_ORGANIZATION	GO_PLASMA_MEMBRANE_ORGANIZATION		16	0.238666	1.13545	0.288889	0.649469	1	383	tags=56%, list=33%, signal=82%
GO_CELL_MOTILITY	GO_CELL_MOTILITY		57	0.129828	1.13532	0.295455	0.645226	1	925	tags=91%, list=79%, signal=409%
GO_POSITIVE_REGULATION_OF_CATABOLIC_PROCESS	GO_POSITIVE_REGULATION_OF_CATABOLIC_PROCESS		26	0.185272	1.13242	0.298479	0.647094	1	870	tags=92%, list=74%, signal=349%
GO_RESPONSE_TO_LIPID	GO_RESPONSE_TO_LIPID		83	0.10734	1.12928	0.298539	0.649464	1	773	tags=76%, list=66%, signal=207%
GO_POSITIVE_REGULATION_OF_INTRACELLULAR_TRANSPORT	GO_POSITIVE_REGULATION_OF_INTRACELLULAR_TRANSPORT		28	0.175767	1.12921	0.281746	0.645269	1	720	tags=79%, list=61%, signal=198%
GO_ORGANIC_ACID_METABOLIC_PROCESS	GO_ORGANIC_ACID_METABOLIC_PROCESS		96	0.103374	1.12639	0.269547	0.646891	1	658	tags=66%, list=56%, signal=137%
GO_ISOPRENOID_METABOLIC_PROCESS	GO_ISOPRENOID_METABOLIC_PROCESS		20	0.212738	1.11982	0.320158	0.656368	1	634	tags=75%, list=54%, signal=160%
GO_RESPONSE_TO_TOXIC_SUBSTANCE	GO_RESPONSE_TO_TOXIC_SUBSTANCE		35	0.160291	1.11964	0.29666	0.652473	1	655	tags=71%, list=56%, signal=157%
GO_REGULATION_OF_NEURON_APOPTOTIC_PROCESS	GO_REGULATION_OF_NEURON_APOPTOTIC_PROCESS		18	0.221934	1.1194	0.33	0.648777	1	786	tags=89%, list=67%, signal=265%
GO_CELLULAR_RESPONSE_TO_BIOTIC_STIMULUS	GO_CELLULAR_RESPONSE_TO_BIOTIC_STIMULUS		18	0.219915	1.11627	0.301486	0.651125	1	397	tags=56%, list=34%, signal=83%
GO_REGULATION_OF_CELL_CYCLE	GO_REGULATION_OF_CELL_CYCLE		62	0.122476	1.11341	0.30814	0.653063	1	393	tags=45%, list=33%, signal=64%
GO_ORGANELLE_LOCALIZATION	GO_ORGANELLE_LOCALIZATION		23	0.191969	1.10613	0.350806	0.663799	1	901	tags=96%, list=77%, signal=403%
GO_RESPONSE_TO_LIGHT_STIMULUS	GO_RESPONSE_TO_LIGHT_STIMULUS		18	0.214821	1.10442	0.317121	0.663096	1	142	tags=33%, list=12%, signal=37%
GO_REPRODUCTION	GO_REPRODUCTION		75	0.110355	1.10181	0.321154	0.664609	1	723	tags=72%, list=62%, signal=175%
GO_PHOSPHOLIPID_BIOSYNTHETIC_PROCESS	GO_PHOSPHOLIPID_BIOSYNTHETIC_PROCESS		28	0.178509	1.09592	0.338742	0.673046	1	633	tags=71%, list=54%, signal=151%
GO_RESPONSE_TO_XENOBIOTIC_STIMULUS	GO_RESPONSE_TO_XENOBIOTIC_STIMULUS		16	0.232189	1.09501	0.34898	0.671066	1	684	tags=81%, list=58%, signal=192%
GO_POSITIVE_REGULATION_OF_CELLULAR_COMPONENT_ORGANIZATION	GO_POSITIVE_REGULATION_OF_CELLULAR_COMPONENT_ORGANIZATION		78	0.107711	1.0873	0.335953	0.683853	1	483	tags=51%, list=41%, signal=81%
GO_GLYCOSYL_COMPOUND_METABOLIC_PROCESS	GO_GLYCOSYL_COMPOUND_METABOLIC_PROCESS		21	0.200058	1.08276	0.31643	0.689108	1	551	tags=67%, list=47%, signal=123%
GO_ENDOCYTOSIS	GO_ENDOCYTOSIS		35	0.153919	1.08052	0.37475	0.68928	1	461	tags=54%, list=39%, signal=87%
GO_CHROMATIN_MODIFICATION	GO_CHROMATIN_MODIFICATION		17	0.221719	1.07296	0.364729	0.70146	1	364	tags=53%, list=31%, signal=76%
GO_POSITIVE_REGULATION_OF_PROTEIN_CATABOLIC_PROCESS	GO_POSITIVE_REGULATION_OF_PROTEIN_CATABOLIC_PROCESS		16	0.222582	1.06696	0.334677	0.7104	1	475	tags=63%, list=40%, signal=104%
GO_NEGATIVE_REGULATION_OF_CELL_CYCLE	GO_NEGATIVE_REGULATION_OF_CELL_CYCLE		31	0.163548	1.06649	0.348269	0.707215	1	418	tags=52%, list=36%, signal=78%
GO_GAMETE_GENERATION	GO_GAMETE_GENERATION		24	0.186304	1.06605	0.353755	0.704016	1	225	tags=38%, list=19%, signal=45%
GO_SECRETION_BY_CELL	GO_SECRETION_BY_CELL		35	0.151712	1.0617	0.342308	0.709332	1	61	tags=20%, list=5%, signal=20%
GO_PEPTIDE_METABOLIC_PROCESS	GO_PEPTIDE_METABOLIC_PROCESS		30	0.160664	1.05129	0.376754	0.727803	1	637	tags=70%, list=54%, signal=149%
GO_POSITIVE_REGULATION_OF_MOLECULAR_FUNCTION	GO_POSITIVE_REGULATION_OF_MOLECULAR_FUNCTION		111	0.0880137	1.04989	0.378882	0.726471	1	466	tags=48%, list=40%, signal=72%
GO_REGULATION_OF_CELLULAR_LOCALIZATION	GO_REGULATION_OF_CELLULAR_LOCALIZATION		92	0.0962589	1.0495	0.376278	0.723201	1	367	tags=40%, list=31%, signal=54%
GO_POSITIVE_REGULATION_OF_PROTEOLYSIS	GO_POSITIVE_REGULATION_OF_PROTEOLYSIS		24	0.181594	1.0402	0.400786	0.73911	1	475	tags=58%, list=40%, signal=96%
GO_REGULATION_OF_PEPTIDE_SECRETION	GO_REGULATION_OF_PEPTIDE_SECRETION		16	0.215889	1.0385	0.373673	0.738547	1	336	tags=50%, list=29%, signal=69%
GO_LEUKOCYTE_ACTIVATION	GO_LEUKOCYTE_ACTIVATION		21	0.189444	1.03749	0.400802	0.736531	1	116	tags=29%, list=10%, signal=31%
GO_ACTIVATION_OF_PROTEIN_KINASE_ACTIVITY	GO_ACTIVATION_OF_PROTEIN_KINASE_ACTIVITY		23	0.183697	1.03673	0.403326	0.733965	1	298	tags=43%, list=25%, signal=57%
GO_PROTEIN_LOCALIZATION	GO_PROTEIN_LOCALIZATION		96	0.094639	1.03244	0.403727	0.739286	1	912	tags=86%, list=78%, signal=356%
GO_NUCLEOSIDE_MONOPHOSPHATE_METABOLIC_PROCESS	GO_NUCLEOSIDE_MONOPHOSPHATE_METABOLIC_PROCESS		15	0.22088	1.02276	0.413306	0.756437	1	917	tags=100%, list=78%, signal=451%
GO_ESTABLISHMENT_OF_PROTEIN_LOCALIZATION_TO_MEMBRANE	GO_ESTABLISHMENT_OF_PROTEIN_LOCALIZATION_TO_MEMBRANE		18	0.203576	1.02052	0.417012	0.756878	1	742	tags=83%, list=63%, signal=223%
GO_VESICLE_MEDIATED_TRANSPORT	GO_VESICLE_MEDIATED_TRANSPORT		73	0.103206	1.01609	0.423529	0.762212	1	400	tags=44%, list=34%, signal=62%
GO_METAL_ION_TRANSPORT	GO_METAL_ION_TRANSPORT		40	0.135979	1.01288	0.407332	0.765035	1	197	tags=30%, list=17%, signal=35%
GO_CELLULAR_RESPONSE_TO_OXYGEN_CONTAINING_COMPOUND	GO_CELLULAR_RESPONSE_TO_OXYGEN_CONTAINING_COMPOUND		71	0.103891	1.00992	0.422018	0.767011	1	397	tags=44%, list=34%, signal=62%
GO_ORGANIC_HYDROXY_COMPOUND_TRANSPORT	GO_ORGANIC_HYDROXY_COMPOUND_TRANSPORT		16	0.208765	1.00477	0.415479	0.774214	1	491	tags=63%, list=42%, signal=106%
GO_POSITIVE_REGULATION_OF_TRANSFERASE_ACTIVITY	GO_POSITIVE_REGULATION_OF_TRANSFERASE_ACTIVITY		44	0.129807	1.00227	0.440574	0.77556	1	466	tags=52%, list=40%, signal=83%
GO_NEGATIVE_REGULATION_OF_PROTEIN_MODIFICATION_PROCESS	GO_NEGATIVE_REGULATION_OF_PROTEIN_MODIFICATION_PROCESS		51	0.122361	1.00141	0.408284	0.773295	1	345	tags=41%, list=29%, signal=56%
GO_REGULATION_OF_REACTIVE_OXYGEN_SPECIES_METABOLIC_PROCESS	GO_REGULATION_OF_REACTIVE_OXYGEN_SPECIES_METABOLIC_PROCESS		16	0.210708	0.999893	0.42126	0.772614	1	342	tags=50%, list=29%, signal=70%
GO_APOPTOTIC_SIGNALING_PATHWAY	GO_APOPTOTIC_SIGNALING_PATHWAY		22	0.178346	0.998635	0.457317	0.771499	1	594	tags=68%, list=51%, signal=135%
GO_GOLGI_VESICLE_TRANSPORT	GO_GOLGI_VESICLE_TRANSPORT		15	0.215473	0.997194	0.416667	0.770724	1	845	tags=93%, list=72%, signal=329%
GO_POSITIVE_REGULATION_OF_I_KAPPAB_KINASE_NF_KAPPAB_SIGNALING	GO_POSITIVE_REGULATION_OF_I_KAPPAB_KINASE_NF_KAPPAB_SIGNALING		17	0.202959	0.995872	0.453094	0.769385	1	731	tags=82%, list=62%, signal=215%
GO_NUCLEOSIDE_PHOSPHATE_BIOSYNTHETIC_PROCESS	GO_NUCLEOSIDE_PHOSPHATE_BIOSYNTHETIC_PROCESS		15	0.22088	0.984914	0.463918	0.789584	1	917	tags=100%, list=78%, signal=451%
GO_ION_HOMEOSTASIS	GO_ION_HOMEOSTASIS		42	0.129438	0.978807	0.45738	0.798802	1	719	tags=74%, list=61%, signal=184%
GO_LIPID_HOMEOSTASIS	GO_LIPID_HOMEOSTASIS		16	0.204771	0.97868	0.465753	0.794913	1	569	tags=69%, list=48%, signal=132%
GO_REGULATION_OF_CELLULAR_PROTEIN_LOCALIZATION	GO_REGULATION_OF_CELLULAR_PROTEIN_LOCALIZATION		39	0.133898	0.977163	0.48374	0.793901	1	720	tags=74%, list=61%, signal=186%
GO_POSITIVE_REGULATION_OF_ESTABLISHMENT_OF_PROTEIN_LOCALIZATION	GO_POSITIVE_REGULATION_OF_ESTABLISHMENT_OF_PROTEIN_LOCALIZATION		33	0.143202	0.973742	0.494	0.797157	1	725	tags=76%, list=62%, signal=193%
GO_LEUKOCYTE_DIFFERENTIATION	GO_LEUKOCYTE_DIFFERENTIATION		22	0.176373	0.97231	0.443798	0.796101	1	116	tags=27%, list=10%, signal=30%
GO_REGULATION_OF_CELLULAR_COMPONENT_BIOGENESIS	GO_REGULATION_OF_CELLULAR_COMPONENT_BIOGENESIS		51	0.116041	0.972141	0.474806	0.792373	1	237	tags=31%, list=20%, signal=38%
GO_PROTEIN_LOCALIZATION_TO_CELL_PERIPHERY	GO_PROTEIN_LOCALIZATION_TO_CELL_PERIPHERY		15	0.208916	0.971013	0.475149	0.790721	1	383	tags=53%, list=33%, signal=78%
GO_REGULATION_OF_PHOSPHORUS_METABOLIC_PROCESS	GO_REGULATION_OF_PHOSPHORUS_METABOLIC_PROCESS		130	0.07598	0.967455	0.458159	0.794319	1	308	tags=33%, list=26%, signal=40%
GO_RESPONSE_TO_OXYGEN_CONTAINING_COMPOUND	GO_RESPONSE_TO_OXYGEN_CONTAINING_COMPOUND		128	0.0755109	0.964063	0.470942	0.797687	1	773	tags=73%, list=66%, signal=190%
GO_REGULATION_OF_HOMOTYPIC_CELL_CELL_ADHESION	GO_REGULATION_OF_HOMOTYPIC_CELL_CELL_ADHESION		15	0.205292	0.962744	0.512097	0.796261	1	622	tags=73%, list=53%, signal=154%
GO_REGULATION_OF_CELLULAR_RESPONSE_TO_STRESS	GO_REGULATION_OF_CELLULAR_RESPONSE_TO_STRESS		36	0.135667	0.956539	0.487179	0.806158	1	986	tags=97%, list=84%, signal=589%
GO_CATION_TRANSPORT	GO_CATION_TRANSPORT		51	0.113369	0.956372	0.477228	0.802562	1	240	tags=31%, list=20%, signal=38%
GO_MONOCARBOXYLIC_ACID_BIOSYNTHETIC_PROCESS	GO_MONOCARBOXYLIC_ACID_BIOSYNTHETIC_PROCESS		18	0.183968	0.954457	0.478	0.802782	1	569	tags=67%, list=48%, signal=127%
GO_SYNAPTIC_SIGNALING	GO_SYNAPTIC_SIGNALING		18	0.186275	0.944831	0.528827	0.819575	1	175	tags=33%, list=15%, signal=39%
GO_CELLULAR_RESPONSE_TO_STEROID_HORMONE_STIMULUS	GO_CELLULAR_RESPONSE_TO_STEROID_HORMONE_STIMULUS		16	0.197323	0.944341	0.496109	0.816728	1	651	tags=75%, list=55%, signal=166%
GO_PROTEIN_OLIGOMERIZATION	GO_PROTEIN_OLIGOMERIZATION		29	0.149164	0.944214	0.52621	0.812997	1	314	tags=41%, list=27%, signal=55%
GO_NEGATIVE_REGULATION_OF_IMMUNE_SYSTEM_PROCESS	GO_NEGATIVE_REGULATION_OF_IMMUNE_SYSTEM_PROCESS		21	0.171767	0.943033	0.534749	0.811537	1	360	tags=48%, list=31%, signal=67%
GO_CARBOHYDRATE_HOMEOSTASIS	GO_CARBOHYDRATE_HOMEOSTASIS		21	0.170198	0.942678	0.521127	0.808463	1	250	tags=38%, list=21%, signal=48%
GO_PROTEIN_UBIQUITINATION	GO_PROTEIN_UBIQUITINATION		29	0.150881	0.94186	0.508806	0.806405	1	393	tags=48%, list=33%, signal=71%
GO_POSITIVE_REGULATION_OF_PHOSPHORUS_METABOLIC_PROCESS	GO_POSITIVE_REGULATION_OF_PHOSPHORUS_METABOLIC_PROCESS		80	0.0931444	0.931858	0.53629	0.823435	1	308	tags=35%, list=26%, signal=44%
GO_REGULATED_EXOCYTOSIS	GO_REGULATED_EXOCYTOSIS		24	0.158768	0.929218	0.541339	0.825336	1	61	tags=21%, list=5%, signal=22%
GO_MULTICELLULAR_ORGANISM_REPRODUCTION	GO_MULTICELLULAR_ORGANISM_REPRODUCTION		38	0.127409	0.92511	0.524096	0.830179	1	225	tags=32%, list=19%, signal=38%
GO_DICARBOXYLIC_ACID_METABOLIC_PROCESS	GO_DICARBOXYLIC_ACID_METABOLIC_PROCESS		18	0.185217	0.916367	0.514852	0.844237	1	698	tags=78%, list=59%, signal=189%
GO_REGULATION_OF_TRANSMEMBRANE_TRANSPORT	GO_REGULATION_OF_TRANSMEMBRANE_TRANSPORT		24	0.156159	0.915931	0.553903	0.841274	1	651	tags=71%, list=55%, signal=156%
GO_POSITIVE_REGULATION_OF_BIOSYNTHETIC_PROCESS	GO_POSITIVE_REGULATION_OF_BIOSYNTHETIC_PROCESS		104	0.0800503	0.906283	0.568317	0.857563	1	839	tags=79%, list=71%, signal=252%
GO_CHROMATIN_ORGANIZATION	GO_CHROMATIN_ORGANIZATION		22	0.161301	0.904361	0.578125	0.85778	1	667	tags=73%, list=57%, signal=165%
GO_RESPONSE_TO_WOUNDING	GO_RESPONSE_TO_WOUNDING		45	0.117134	0.904339	0.568862	0.853886	1	232	tags=31%, list=20%, signal=37%
GO_REGULATION_OF_SEQUENCE_SPECIFIC_DNA_BINDING_TRANSCRIPTION_FACTOR_ACTIVITY	GO_REGULATION_OF_SEQUENCE_SPECIFIC_DNA_BINDING_TRANSCRIPTION_FACTOR_ACTIVITY		24	0.157754	0.902125	0.575697	0.854603	1	747	tags=79%, list=64%, signal=213%
GO_RESPONSE_TO_HORMONE	GO_RESPONSE_TO_HORMONE		78	0.0909835	0.900793	0.556436	0.853221	1	697	tags=68%, list=59%, signal=156%
GO_REGULATION_OF_RESPONSE_TO_CYTOKINE_STIMULUS	GO_REGULATION_OF_RESPONSE_TO_CYTOKINE_STIMULUS		16	0.18696	0.898105	0.572025	0.855281	1	663	tags=75%, list=56%, signal=170%
GO_LOCOMOTION	GO_LOCOMOTION		77	0.0870852	0.895407	0.568273	0.85673	1	925	tags=87%, list=79%, signal=383%
GO_REGULATION_OF_CELL_ACTIVATION	GO_REGULATION_OF_CELL_ACTIVATION		23	0.15359	0.888649	0.580198	0.867073	1	741	tags=78%, list=63%, signal=208%
GO_CELLULAR_RESPONSE_TO_ACID_CHEMICAL	GO_CELLULAR_RESPONSE_TO_ACID_CHEMICAL		18	0.17599	0.882095	0.589354	0.876707	1	513	tags=61%, list=44%, signal=107%
GO_NEGATIVE_REGULATION_OF_CATALYTIC_ACTIVITY	GO_NEGATIVE_REGULATION_OF_CATALYTIC_ACTIVITY		71	0.0925261	0.878549	0.605058	0.87992	1	393	tags=42%, list=33%, signal=60%
GO_POSITIVE_REGULATION_OF_CYTOKINE_PRODUCTION	GO_POSITIVE_REGULATION_OF_CYTOKINE_PRODUCTION		27	0.140463	0.873238	0.619329	0.886428	1	751	tags=78%, list=64%, signal=211%
GO_LYMPHOCYTE_ACTIVATION	GO_LYMPHOCYTE_ACTIVATION		19	0.166188	0.869995	0.584906	0.889063	1	116	tags=26%, list=10%, signal=29%
GO_NEGATIVE_REGULATION_OF_LOCOMOTION	GO_NEGATIVE_REGULATION_OF_LOCOMOTION		21	0.160699	0.869549	0.591716	0.886052	1	820	tags=86%, list=70%, signal=279%
GO_PROTEIN_COMPLEX_BIOGENESIS	GO_PROTEIN_COMPLEX_BIOGENESIS		71	0.090649	0.867743	0.603622	0.88583	1	362	tags=39%, list=31%, signal=54%
GO_EXOCYTOSIS	GO_EXOCYTOSIS		26	0.142656	0.863553	0.628099	0.890442	1	61	tags=19%, list=5%, signal=20%
GO_RESPONSE_TO_ALCOHOL	GO_RESPONSE_TO_ALCOHOL		36	0.121461	0.860592	0.61477	0.892722	1	513	tags=56%, list=44%, signal=96%
GO_RESPONSE_TO_ORGANIC_CYCLIC_COMPOUND	GO_RESPONSE_TO_ORGANIC_CYCLIC_COMPOUND		87	0.0824583	0.851987	0.612284	0.90599	1	773	tags=74%, list=66%, signal=199%
GO_SECRETION	GO_SECRETION		44	0.110418	0.849294	0.62549	0.90749	1	61	tags=16%, list=5%, signal=16%
GO_POSITIVE_REGULATION_OF_DEVELOPMENTAL_GROWTH	GO_POSITIVE_REGULATION_OF_DEVELOPMENTAL_GROWTH		15	0.181938	0.846872	0.648703	0.908373	1	336	tags=47%, list=29%, signal=65%
GO_REGULATION_OF_VESICLE_MEDIATED_TRANSPORT	GO_REGULATION_OF_VESICLE_MEDIATED_TRANSPORT		38	0.117355	0.843902	0.655303	0.910536	1	947	tags=92%, list=81%, signal=461%
GO_REGULATION_OF_HOMEOSTATIC_PROCESS	GO_REGULATION_OF_HOMEOSTATIC_PROCESS		36	0.120435	0.840728	0.64257	0.912923	1	612	tags=64%, list=52%, signal=129%
GO_VITAMIN_METABOLIC_PROCESS	GO_VITAMIN_METABOLIC_PROCESS		15	0.181133	0.840252	0.668663	0.909959	1	650	tags=73%, list=55%, signal=162%
GO_POSITIVE_REGULATION_OF_PROTEIN_METABOLIC_PROCESS	GO_POSITIVE_REGULATION_OF_PROTEIN_METABOLIC_PROCESS		101	0.0747511	0.836635	0.657948	0.913072	1	314	tags=34%, list=27%, signal=42%
GO_HEXOSE_METABOLIC_PROCESS	GO_HEXOSE_METABOLIC_PROCESS		19	0.160583	0.835172	0.669941	0.912116	1	555	tags=63%, list=47%, signal=118%
GO_PLATELET_DEGRANULATION	GO_PLATELET_DEGRANULATION		19	0.16031	0.831724	0.656379	0.91511	1	61	tags=21%, list=5%, signal=22%
GO_SINGLE_ORGANISM_CATABOLIC_PROCESS	GO_SINGLE_ORGANISM_CATABOLIC_PROCESS		92	0.0756851	0.829054	0.65261	0.916592	1	670	tags=64%, list=57%, signal=138%
GO_POSITIVE_REGULATION_OF_CELL_ACTIVATION	GO_POSITIVE_REGULATION_OF_CELL_ACTIVATION		15	0.178775	0.826942	0.679283	0.916747	1	731	tags=80%, list=62%, signal=209%
GO_RESPONSE_TO_ACID_CHEMICAL	GO_RESPONSE_TO_ACID_CHEMICAL		35	0.117471	0.825611	0.669941	0.915454	1	100	tags=20%, list=9%, signal=21%
GO_MOVEMENT_OF_CELL_OR_SUBCELLULAR_COMPONENT	GO_MOVEMENT_OF_CELL_OR_SUBCELLULAR_COMPONENT		81	0.0810319	0.82446	0.675732	0.913945	1	925	tags=86%, list=79%, signal=379%
GO_NEGATIVE_REGULATION_OF_PROTEOLYSIS	GO_NEGATIVE_REGULATION_OF_PROTEOLYSIS		33	0.122381	0.823599	0.679921	0.911912	1	393	tags=45%, list=33%, signal=66%
GO_REGULATION_OF_SMALL_GTPASE_MEDIATED_SIGNAL_TRANSDUCTION	GO_REGULATION_OF_SMALL_GTPASE_MEDIATED_SIGNAL_TRANSDUCTION		20	0.153293	0.822381	0.669388	0.91041	1	820	tags=85%, list=70%, signal=277%
GO_ORGAN_REGENERATION	GO_ORGAN_REGENERATION		17	0.164574	0.817237	0.700382	0.916557	1	292	tags=41%, list=25%, signal=54%
GO_SINGLE_ORGANISM_CELLULAR_LOCALIZATION	GO_SINGLE_ORGANISM_CELLULAR_LOCALIZATION		45	0.10558	0.816304	0.688755	0.914597	1	819	tags=80%, list=70%, signal=254%
GO_REGULATION_OF_PROTEIN_TARGETING	GO_REGULATION_OF_PROTEIN_TARGETING		16	0.175302	0.815625	0.7	0.912214	1	383	tags=50%, list=33%, signal=73%
GO_PROTEIN_CATABOLIC_PROCESS	GO_PROTEIN_CATABOLIC_PROCESS		27	0.131357	0.810871	0.718163	0.917247	1	631	tags=67%, list=54%, signal=141%
GO_REGULATION_OF_CARBOHYDRATE_METABOLIC_PROCESS	GO_REGULATION_OF_CARBOHYDRATE_METABOLIC_PROCESS		15	0.178142	0.808716	0.697897	0.917524	1	810	tags=87%, list=69%, signal=276%
GO_REGENERATION	GO_REGENERATION		20	0.153033	0.803722	0.713992	0.923245	1	292	tags=40%, list=25%, signal=52%
GO_RESPONSE_TO_TOPOLOGICALLY_INCORRECT_PROTEIN	GO_RESPONSE_TO_TOPOLOGICALLY_INCORRECT_PROTEIN		16	0.163428	0.799776	0.697266	0.92666	1	250	tags=38%, list=21%, signal=47%
GO_MACROMOLECULAR_COMPLEX_ASSEMBLY	GO_MACROMOLECULAR_COMPLEX_ASSEMBLY		79	0.0790012	0.799512	0.718391	0.923393	1	819	tags=77%, list=70%, signal=238%
GO_REGULATION_OF_APOPTOTIC_SIGNALING_PATHWAY	GO_REGULATION_OF_APOPTOTIC_SIGNALING_PATHWAY		30	0.120513	0.797964	0.725738	0.922638	1	996	tags=97%, list=85%, signal=621%
GO_NEGATIVE_REGULATION_OF_TRANSFERASE_ACTIVITY	GO_NEGATIVE_REGULATION_OF_TRANSFERASE_ACTIVITY		36	0.112283	0.7975	0.726337	0.919985	1	393	tags=44%, list=33%, signal=65%
GO_REGULATION_OF_PROTEIN_CATABOLIC_PROCESS	GO_REGULATION_OF_PROTEIN_CATABOLIC_PROCESS		25	0.134099	0.791345	0.728778	0.927385	1	925	tags=92%, list=79%, signal=425%
GO_REGULATION_OF_ANATOMICAL_STRUCTURE_SIZE	GO_REGULATION_OF_ANATOMICAL_STRUCTURE_SIZE		44	0.101448	0.789233	0.72	0.927595	1	1005	tags=95%, list=86%, signal=638%
GO_REGULATION_OF_INTRACELLULAR_PROTEIN_TRANSPORT	GO_REGULATION_OF_INTRACELLULAR_PROTEIN_TRANSPORT		24	0.133986	0.788777	0.731161	0.924968	1	383	tags=46%, list=33%, signal=67%
GO_CELLULAR_AMIDE_METABOLIC_PROCESS	GO_CELLULAR_AMIDE_METABOLIC_PROCESS		44	0.101891	0.786712	0.737864	0.925045	1	711	tags=70%, list=61%, signal=172%
GO_RESPONSE_TO_STARVATION	GO_RESPONSE_TO_STARVATION		18	0.157343	0.785687	0.72179	0.923145	1	665	tags=72%, list=57%, signal=164%
GO_SINGLE_ORGANISM_BEHAVIOR	GO_SINGLE_ORGANISM_BEHAVIOR		19	0.15074	0.785519	0.731161	0.919898	1	381	tags=47%, list=32%, signal=69%
GO_REGULATION_OF_STRESS_ACTIVATED_PROTEIN_KINASE_SIGNALING_CASCADE	GO_REGULATION_OF_STRESS_ACTIVATED_PROTEIN_KINASE_SIGNALING_CASCADE		15	0.172563	0.783818	0.724753	0.919373	1	973	tags=100%, list=83%, signal=577%
GO_DEFENSE_RESPONSE_TO_OTHER_ORGANISM	GO_DEFENSE_RESPONSE_TO_OTHER_ORGANISM		28	0.125904	0.783191	0.750988	0.916851	1	861	tags=86%, list=73%, signal=314%
GO_REGULATION_OF_NEURON_PROJECTION_DEVELOPMENT	GO_REGULATION_OF_NEURON_PROJECTION_DEVELOPMENT		28	0.124969	0.782893	0.738431	0.913892	1	904	tags=89%, list=77%, signal=379%
GO_HOMEOSTATIC_PROCESS	GO_HOMEOSTATIC_PROCESS		107	0.0670146	0.779198	0.750491	0.916782	1	904	tags=83%, list=77%, signal=329%
GO_CHEMICAL_HOMEOSTASIS	GO_CHEMICAL_HOMEOSTASIS		79	0.0753252	0.772192	0.766529	0.924971	1	719	tags=68%, list=61%, signal=165%
GO_PURINE_CONTAINING_COMPOUND_METABOLIC_PROCESS	GO_PURINE_CONTAINING_COMPOUND_METABOLIC_PROCESS		29	0.121578	0.771759	0.745631	0.922224	1	548	tags=59%, list=47%, signal=107%
GO_CELLULAR_RESPONSE_TO_PEPTIDE	GO_CELLULAR_RESPONSE_TO_PEPTIDE		28	0.122663	0.769389	0.750487	0.922809	1	697	tags=71%, list=59%, signal=172%
GO_NEGATIVE_REGULATION_OF_ESTABLISHMENT_OF_PROTEIN_LOCALIZATION	GO_NEGATIVE_REGULATION_OF_ESTABLISHMENT_OF_PROTEIN_LOCALIZATION		19	0.149009	0.769133	0.727811	0.919861	1	383	tags=47%, list=33%, signal=69%
GO_REGULATION_OF_NERVOUS_SYSTEM_DEVELOPMENT	GO_REGULATION_OF_NERVOUS_SYSTEM_DEVELOPMENT		44	0.100764	0.764608	0.759296	0.923803	1	232	tags=30%, list=20%, signal=35%
GO_REGULATION_OF_PEPTIDASE_ACTIVITY	GO_REGULATION_OF_PEPTIDASE_ACTIVITY		34	0.111352	0.761361	0.775758	0.92597	1	390	tags=44%, list=33%, signal=64%
GO_ORGANIC_CYCLIC_COMPOUND_CATABOLIC_PROCESS	GO_ORGANIC_CYCLIC_COMPOUND_CATABOLIC_PROCESS		26	0.121013	0.753966	0.786561	0.934608	1	718	tags=73%, list=61%, signal=184%
GO_BEHAVIOR	GO_BEHAVIOR		27	0.123188	0.750565	0.780822	0.936616	1	336	tags=41%, list=29%, signal=56%
GO_PROTEIN_AUTOPHOSPHORYLATION	GO_PROTEIN_AUTOPHOSPHORYLATION		21	0.137116	0.74976	0.776618	0.934504	1	959	tags=95%, list=82%, signal=511%
GO_REGULATION_OF_PROTEIN_COMPLEX_ASSEMBLY	GO_REGULATION_OF_PROTEIN_COMPLEX_ASSEMBLY		22	0.133523	0.749099	0.752066	0.932189	1	112	tags=23%, list=10%, signal=25%
GO_REGULATION_OF_MUSCLE_SYSTEM_PROCESS	GO_REGULATION_OF_MUSCLE_SYSTEM_PROCESS		15	0.161691	0.747363	0.782158	0.931561	1	516	tags=60%, list=44%, signal=106%
GO_RECEPTOR_MEDIATED_ENDOCYTOSIS	GO_RECEPTOR_MEDIATED_ENDOCYTOSIS		16	0.160622	0.74709	0.778905	0.928596	1	400	tags=50%, list=34%, signal=75%
GO_RESPONSE_TO_EXTRACELLULAR_STIMULUS	GO_RESPONSE_TO_EXTRACELLULAR_STIMULUS		51	0.0913345	0.747028	0.780933	0.92538	1	564	tags=57%, list=48%, signal=105%
GO_REGULATION_OF_TRANSFERASE_ACTIVITY	GO_REGULATION_OF_TRANSFERASE_ACTIVITY		75	0.0749166	0.745538	0.803059	0.92426	1	308	tags=33%, list=26%, signal=42%
GO_POSITIVE_REGULATION_OF_MAPK_CASCADE	GO_POSITIVE_REGULATION_OF_MAPK_CASCADE		43	0.0946065	0.738082	0.802062	0.932315	1	1066	tags=100%, list=91%, signal=1047%
GO_CELLULAR_RESPONSE_TO_EXTERNAL_STIMULUS	GO_CELLULAR_RESPONSE_TO_EXTERNAL_STIMULUS		26	0.118936	0.736986	0.822086	0.930613	1	314	tags=38%, list=27%, signal=51%
GO_MONOVALENT_INORGANIC_CATION_TRANSPORT	GO_MONOVALENT_INORGANIC_CATION_TRANSPORT		22	0.130129	0.735519	0.823293	0.929418	1	276	tags=36%, list=24%, signal=47%
GO_POSITIVE_REGULATION_OF_PROTEIN_MODIFICATION_PROCESS	GO_POSITIVE_REGULATION_OF_PROTEIN_MODIFICATION_PROCESS		79	0.0706665	0.731779	0.819127	0.931382	1	308	tags=33%, list=26%, signal=42%
GO_AMIDE_BIOSYNTHETIC_PROCESS	GO_AMIDE_BIOSYNTHETIC_PROCESS		16	0.15544	0.72972	0.807771	0.931099	1	993	tags=100%, list=85%, signal=640%
GO_REGULATION_OF_PROTEIN_SECRETION	GO_REGULATION_OF_PROTEIN_SECRETION		27	0.12012	0.728083	0.806773	0.930178	1	383	tags=44%, list=33%, signal=64%
GO_REGULATION_OF_PROTEOLYSIS	GO_REGULATION_OF_PROTEOLYSIS		61	0.0799935	0.725385	0.818182	0.930921	1	930	tags=87%, list=79%, signal=396%
GO_MACROMOLECULE_CATABOLIC_PROCESS	GO_MACROMOLECULE_CATABOLIC_PROCESS		38	0.0963677	0.719564	0.838966	0.936462	1	631	tags=63%, list=54%, signal=132%
GO_REGULATION_OF_INTRACELLULAR_SIGNAL_TRANSDUCTION	GO_REGULATION_OF_INTRACELLULAR_SIGNAL_TRANSDUCTION		136	0.0541341	0.714006	0.833663	0.941159	1	314	tags=32%, list=27%, signal=38%
GO_CELLULAR_RESPONSE_TO_EXTRACELLULAR_STIMULUS	GO_CELLULAR_RESPONSE_TO_EXTRACELLULAR_STIMULUS		21	0.130384	0.706507	0.828571	0.948115	1	240	tags=33%, list=20%, signal=41%
GO_PHOSPHORYLATION	GO_PHOSPHORYLATION		83	0.0667565	0.698998	0.854839	0.955165	1	888	tags=82%, list=76%, signal=313%
GO_POSITIVE_REGULATION_OF_RESPONSE_TO_WOUNDING	GO_POSITIVE_REGULATION_OF_RESPONSE_TO_WOUNDING		15	0.150992	0.697961	0.840081	0.953227	1	998	tags=100%, list=85%, signal=659%
GO_NEUTRAL_LIPID_METABOLIC_PROCESS	GO_NEUTRAL_LIPID_METABOLIC_PROCESS		15	0.148059	0.697584	0.846465	0.95051	1	297	tags=40%, list=25%, signal=53%
GO_POSITIVE_REGULATION_OF_CELL_CELL_ADHESION	GO_POSITIVE_REGULATION_OF_CELL_CELL_ADHESION		17	0.139509	0.694112	0.83691	0.95172	1	321	tags=41%, list=27%, signal=56%
GO_BIOLOGICAL_ADHESION	GO_BIOLOGICAL_ADHESION		61	0.0772097	0.687502	0.870334	0.956735	1	221	tags=26%, list=19%, signal=31%
GO_RESPONSE_TO_EXTERNAL_STIMULUS	GO_RESPONSE_TO_EXTERNAL_STIMULUS		141	0.052165	0.685267	0.874532	0.95626	1	861	tags=78%, list=73%, signal=257%
GO_REGULATION_OF_ACTIN_FILAMENT_BASED_PROCESS	GO_REGULATION_OF_ACTIN_FILAMENT_BASED_PROCESS		24	0.116159	0.673703	0.834331	0.967581	1	110	tags=21%, list=9%, signal=23%
GO_CELLULAR_MACROMOLECULAR_COMPLEX_ASSEMBLY	GO_CELLULAR_MACROMOLECULAR_COMPLEX_ASSEMBLY		31	0.102503	0.672959	0.881048	0.965348	1	715	tags=71%, list=61%, signal=177%
GO_CELLULAR_RESPONSE_TO_OXIDATIVE_STRESS	GO_CELLULAR_RESPONSE_TO_OXIDATIVE_STRESS		15	0.144492	0.668327	0.853565	0.967993	1	849	tags=87%, list=72%, signal=309%
GO_NEGATIVE_REGULATION_OF_PEPTIDASE_ACTIVITY	GO_NEGATIVE_REGULATION_OF_PEPTIDASE_ACTIVITY		25	0.109278	0.662465	0.910021	0.971491	1	390	tags=44%, list=33%, signal=64%
GO_POSITIVE_REGULATION_OF_NERVOUS_SYSTEM_DEVELOPMENT	GO_POSITIVE_REGULATION_OF_NERVOUS_SYSTEM_DEVELOPMENT		29	0.10637	0.661742	0.873984	0.969081	1	363	tags=41%, list=31%, signal=58%
GO_RESPONSE_TO_NITROGEN_COMPOUND	GO_RESPONSE_TO_NITROGEN_COMPOUND		76	0.0659093	0.659323	0.888889	0.968607	1	699	tags=66%, list=60%, signal=152%
GO_INFLAMMATORY_RESPONSE	GO_INFLAMMATORY_RESPONSE		32	0.0993871	0.657257	0.881838	0.96752	1	766	tags=75%, list=65%, signal=210%
GO_RESPONSE_TO_INSULIN	GO_RESPONSE_TO_INSULIN		21	0.121918	0.654847	0.88694	0.966902	1	697	tags=71%, list=59%, signal=173%
GO_CELLULAR_RESPONSE_TO_ORGANIC_CYCLIC_COMPOUND	GO_CELLULAR_RESPONSE_TO_ORGANIC_CYCLIC_COMPOUND		43	0.0867107	0.652081	0.905462	0.966723	1	720	tags=70%, list=61%, signal=174%
GO_REGULATION_OF_PROTEIN_LOCALIZATION_TO_NUCLEUS	GO_REGULATION_OF_PROTEIN_LOCALIZATION_TO_NUCLEUS		15	0.141386	0.648732	0.91018	0.967018	1	383	tags=47%, list=33%, signal=68%
GO_CELL_PART_MORPHOGENESIS	GO_CELL_PART_MORPHOGENESIS		33	0.0953443	0.648141	0.91	0.964461	1	495	tags=52%, list=42%, signal=87%
GO_DEVELOPMENTAL_MATURATION	GO_DEVELOPMENTAL_MATURATION		16	0.135255	0.645445	0.904863	0.964142	1	356	tags=44%, list=30%, signal=62%
GO_POSITIVE_REGULATION_OF_ION_TRANSPORT	GO_POSITIVE_REGULATION_OF_ION_TRANSPORT		20	0.120797	0.640055	0.896686	0.96663	1	564	tags=60%, list=48%, signal=114%
GO_REGULATION_OF_EXTRINSIC_APOPTOTIC_SIGNALING_PATHWAY	GO_REGULATION_OF_EXTRINSIC_APOPTOTIC_SIGNALING_PATHWAY		18	0.129566	0.639298	0.884849	0.964219	1	371	tags=44%, list=32%, signal=64%
GO_REGULATION_OF_ION_TRANSPORT	GO_REGULATION_OF_ION_TRANSPORT		37	0.0891155	0.633231	0.917339	0.9669	1	564	tags=57%, list=48%, signal=106%
GO_CELLULAR_RESPONSE_TO_NITROGEN_COMPOUND	GO_CELLULAR_RESPONSE_TO_NITROGEN_COMPOUND		48	0.0793739	0.625554	0.929412	0.97078	1	570	tags=56%, list=49%, signal=105%
GO_CELLULAR_RESPONSE_TO_STARVATION	GO_CELLULAR_RESPONSE_TO_STARVATION		15	0.134426	0.624936	0.913793	0.96825	1	78	tags=20%, list=7%, signal=21%
GO_RESPONSE_TO_REACTIVE_OXYGEN_SPECIES	GO_RESPONSE_TO_REACTIVE_OXYGEN_SPECIES		21	0.11469	0.622896	0.922929	0.966875	1	314	tags=38%, list=27%, signal=51%
GO_CELLULAR_RESPONSE_TO_INORGANIC_SUBSTANCE	GO_CELLULAR_RESPONSE_TO_INORGANIC_SUBSTANCE		18	0.119858	0.618438	0.919325	0.967764	1	904	tags=89%, list=77%, signal=381%
GO_REGULATION_OF_HORMONE_SECRETION	GO_REGULATION_OF_HORMONE_SECRETION		20	0.114905	0.612047	0.917339	0.969908	1	336	tags=40%, list=29%, signal=55%
GO_MUSCLE_CELL_DIFFERENTIATION	GO_MUSCLE_CELL_DIFFERENTIATION		16	0.125756	0.594257	0.928	0.980602	1	367	tags=44%, list=31%, signal=63%
GO_RESPONSE_TO_PEPTIDE	GO_RESPONSE_TO_PEPTIDE		37	0.0837672	0.587545	0.956612	0.982223	1	697	tags=68%, list=59%, signal=161%
GO_REGULATION_OF_INNATE_IMMUNE_RESPONSE	GO_REGULATION_OF_INNATE_IMMUNE_RESPONSE		20	0.110312	0.582866	0.972112	0.982315	1	400	tags=45%, list=34%, signal=67%
GO_CELLULAR_MODIFIED_AMINO_ACID_METABOLIC_PROCESS	GO_CELLULAR_MODIFIED_AMINO_ACID_METABOLIC_PROCESS		32	0.0847198	0.568797	0.973896	0.988341	1	636	tags=63%, list=54%, signal=133%
GO_NEURON_PROJECTION_GUIDANCE	GO_NEURON_PROJECTION_GUIDANCE		16	0.119171	0.566685	0.966068	0.986413	1	448	tags=50%, list=38%, signal=80%
GO_CELLULAR_RESPONSE_TO_INSULIN_STIMULUS	GO_CELLULAR_RESPONSE_TO_INSULIN_STIMULUS		20	0.107279	0.564344	0.966926	0.984649	1	697	tags=70%, list=59%, signal=169%
GO_PROTEIN_PHOSPHORYLATION	GO_PROTEIN_PHOSPHORYLATION		63	0.061849	0.550393	0.974409	0.988814	1	98	tags=14%, list=8%, signal=15%
GO_REGULATION_OF_IMMUNE_SYSTEM_PROCESS	GO_REGULATION_OF_IMMUNE_SYSTEM_PROCESS		91	0.0515865	0.545801	0.977778	0.987918	1	743	tags=68%, list=63%, signal=171%
GO_RESPONSE_TO_ENDOGENOUS_STIMULUS	GO_RESPONSE_TO_ENDOGENOUS_STIMULUS		126	0.0433176	0.538477	0.98062	0.988047	1	699	tags=63%, list=60%, signal=140%
GO_REGULATION_OF_LIPID_METABOLIC_PROCESS	GO_REGULATION_OF_LIPID_METABOLIC_PROCESS		27	0.0842133	0.519423	0.982387	0.992023	1	859	tags=81%, list=73%, signal=297%
GO_ANATOMICAL_STRUCTURE_HOMEOSTASIS	GO_ANATOMICAL_STRUCTURE_HOMEOSTASIS		18	0.103422	0.518354	0.986248	0.989344	1	336	tags=39%, list=29%, signal=54%
GO_PROTEIN_LOCALIZATION_TO_MEMBRANE	GO_PROTEIN_LOCALIZATION_TO_MEMBRANE		27	0.081178	0.491368	0.99211	0.993479	1	819	tags=78%, list=70%, signal=251%
GO_REGULATION_OF_CYTOKINE_PRODUCTION	GO_REGULATION_OF_CYTOKINE_PRODUCTION		37	0.0685541	0.472064	0.989754	0.994028	1	397	tags=41%, list=34%, signal=59%

## Sheet: WT vs SKO liver down GO
NAME	GS<br> follow link to MSigDB	GS DETAILS	SIZE	ES	NES	NOM p-val	FDR q-val	FWER p-val	RANK AT MAX	LEADING EDGE
GO_PROTEIN_ACTIVATION_CASCADE	GO_PROTEIN_ACTIVATION_CASCADE	Details ...	16	-0.56304	-2.70247	0	0.00750204	0.008	523	tags=100%, list=45%, signal=178%
GO_TISSUE_MORPHOGENESIS	GO_TISSUE_MORPHOGENESIS	Details ...	36	-0.337336	-2.41444	0	0.0452736	0.093	465	tags=72%, list=40%, signal=116%
GO_UROGENITAL_SYSTEM_DEVELOPMENT	GO_UROGENITAL_SYSTEM_DEVELOPMENT	Details ...	27	-0.353579	-2.19221	0.00200401	0.145696	0.374	639	tags=89%, list=54%, signal=191%
GO_TUBE_MORPHOGENESIS	GO_TUBE_MORPHOGENESIS	Details ...	24	-0.362174	-2.09353	0.00193424	0.208669	0.602	465	tags=75%, list=40%, signal=122%
GO_RESPIRATORY_SYSTEM_DEVELOPMENT	GO_RESPIRATORY_SYSTEM_DEVELOPMENT	Details ...	15	-0.44176	-2.06227	0.00601202	0.203963	0.669	663	tags=100%, list=56%, signal=227%
GO_ORGAN_MORPHOGENESIS	GO_ORGAN_MORPHOGENESIS	Details ...	63	-0.220136	-2.04597	0.00211416	0.189539	0.709	595	tags=71%, list=51%, signal=137%
GO_IMMUNE_SYSTEM_PROCESS	GO_IMMUNE_SYSTEM_PROCESS	Details ...	127	-0.160662	-2.01028	0.00380952	0.200431	0.785	674	tags=72%, list=57%, signal=150%
GO_ADAPTIVE_IMMUNE_RESPONSE	GO_ADAPTIVE_IMMUNE_RESPONSE	Details ...	21	-0.371536	-2.00704	0.00793651	0.179534	0.791	523	tags=81%, list=45%, signal=143%
GO_HUMORAL_IMMUNE_RESPONSE	GO_HUMORAL_IMMUNE_RESPONSE	Details ...	18	-0.394752	-1.97789	0.00798403	0.188537	0.832	523	tags=83%, list=45%, signal=148%
GO_NEGATIVE_REGULATION_OF_NITROGEN_COMPOUND_METABOLIC_PROCESS	GO_NEGATIVE_REGULATION_OF_NITROGEN_COMPOUND_METABOLIC_PROCESS	Details ...	84	-0.189624	-1.97032	0.00773694	0.177633	0.85	563	tags=65%, list=48%, signal=117%
GO_MORPHOGENESIS_OF_AN_EPITHELIUM	GO_MORPHOGENESIS_OF_AN_EPITHELIUM	Details ...	27	-0.315735	-1.95057	0.0113422	0.180201	0.885	465	tags=70%, list=40%, signal=114%
GO_MYELOID_CELL_DIFFERENTIATION	GO_MYELOID_CELL_DIFFERENTIATION	Details ...	18	-0.374183	-1.94937	0.0059761	0.16648	0.886	612	tags=89%, list=52%, signal=183%
GO_TUBE_DEVELOPMENT	GO_TUBE_DEVELOPMENT	Details ...	37	-0.269985	-1.94848	0.0123457	0.154303	0.887	519	tags=70%, list=44%, signal=122%
GO_NEGATIVE_REGULATION_OF_GENE_EXPRESSION	GO_NEGATIVE_REGULATION_OF_GENE_EXPRESSION	Details ...	90	-0.1795	-1.93775	0.00808081	0.153308	0.902	563	tags=64%, list=48%, signal=114%
GO_INNATE_IMMUNE_RESPONSE	GO_INNATE_IMMUNE_RESPONSE	Details ...	42	-0.245162	-1.86903	0.0123203	0.215052	0.967	590	tags=74%, list=50%, signal=143%
GO_HEART_DEVELOPMENT	GO_HEART_DEVELOPMENT	Details ...	36	-0.257567	-1.79069	0.015873	0.304253	0.997	621	tags=78%, list=53%, signal=160%
GO_POSITIVE_REGULATION_OF_EPITHELIAL_CELL_PROLIFERATION	GO_POSITIVE_REGULATION_OF_EPITHELIAL_CELL_PROLIFERATION	Details ...	21	-0.324867	-1.78662	0.0241935	0.291773	0.997	465	tags=71%, list=40%, signal=116%
GO_PEPTIDYL_TYROSINE_MODIFICATION	GO_PEPTIDYL_TYROSINE_MODIFICATION	Details ...	20	-0.336742	-1.77649	0.0204499	0.290134	0.998	669	tags=90%, list=57%, signal=206%
GO_REGULATION_OF_ANATOMICAL_STRUCTURE_MORPHOGENESIS	GO_REGULATION_OF_ANATOMICAL_STRUCTURE_MORPHOGENESIS	Details ...	75	-0.179302	-1.76181	0.0172745	0.295918	0.999	524	tags=61%, list=45%, signal=104%
GO_RESPONSE_TO_CAMP	GO_RESPONSE_TO_CAMP	Details ...	15	-0.375094	-1.75158	0.0179283	0.296498	0.999	662	tags=93%, list=56%, signal=211%
GO_IMMUNE_SYSTEM_DEVELOPMENT	GO_IMMUNE_SYSTEM_DEVELOPMENT		45	-0.221376	-1.70957	0.024	0.35033	1	612	tags=73%, list=52%, signal=147%
GO_IMMUNE_EFFECTOR_PROCESS	GO_IMMUNE_EFFECTOR_PROCESS		32	-0.255254	-1.69036	0.0217391	0.368762	1	590	tags=75%, list=50%, signal=147%
GO_REGULATION_OF_CELL_MORPHOGENESIS	GO_REGULATION_OF_CELL_MORPHOGENESIS		39	-0.228781	-1.685	0.0180361	0.361501	1	524	tags=67%, list=45%, signal=116%
GO_IMMUNE_RESPONSE	GO_IMMUNE_RESPONSE		70	-0.176656	-1.68137	0.0161943	0.352509	1	611	tags=69%, list=52%, signal=134%
GO_REGULATION_OF_PHOSPHATIDYLINOSITOL_3_KINASE_SIGNALING	GO_REGULATION_OF_PHOSPHATIDYLINOSITOL_3_KINASE_SIGNALING		16	-0.355354	-1.6779	0.023301	0.345262	1	470	tags=75%, list=40%, signal=123%
GO_POSITIVE_REGULATION_OF_SECRETION	GO_POSITIVE_REGULATION_OF_SECRETION		31	-0.253634	-1.65916	0.0392562	0.365602	1	620	tags=77%, list=53%, signal=160%
GO_REGULATION_OF_CELL_MORPHOGENESIS_INVOLVED_IN_DIFFERENTIATION	GO_REGULATION_OF_CELL_MORPHOGENESIS_INVOLVED_IN_DIFFERENTIATION		27	-0.264297	-1.61069	0.0433925	0.446502	1	524	tags=70%, list=45%, signal=124%
GO_REGULATION_OF_ERK1_AND_ERK2_CASCADE	GO_REGULATION_OF_ERK1_AND_ERK2_CASCADE		39	-0.223314	-1.60027	0.0575397	0.451795	1	470	tags=62%, list=40%, signal=99%
GO_EPITHELIAL_CELL_DEVELOPMENT	GO_EPITHELIAL_CELL_DEVELOPMENT		15	-0.338625	-1.59353	0.0350877	0.449621	1	626	tags=87%, list=53%, signal=183%
GO_EMBRYONIC_ORGAN_DEVELOPMENT	GO_EMBRYONIC_ORGAN_DEVELOPMENT		32	-0.236208	-1.57702	0.0361446	0.469519	1	465	tags=63%, list=40%, signal=101%
GO_REPRODUCTIVE_SYSTEM_DEVELOPMENT	GO_REPRODUCTIVE_SYSTEM_DEVELOPMENT		33	-0.227711	-1.55068	0.0451866	0.512738	1	595	tags=73%, list=51%, signal=143%
GO_OSSIFICATION	GO_OSSIFICATION		22	-0.278488	-1.54904	0.0606654	0.500148	1	534	tags=73%, list=45%, signal=131%
GO_RESPONSE_TO_CYTOKINE	GO_RESPONSE_TO_CYTOKINE		51	-0.184118	-1.54147	0.043299	0.503584	1	692	tags=76%, list=59%, signal=178%
GO_RESPONSE_TO_ORGANOPHOSPHORUS	GO_RESPONSE_TO_ORGANOPHOSPHORUS		19	-0.288175	-1.5395	0.0497018	0.493276	1	595	tags=79%, list=51%, signal=157%
GO_CELL_DEVELOPMENT	GO_CELL_DEVELOPMENT		86	-0.14413	-1.52611	0.0669291	0.509483	1	595	tags=64%, list=51%, signal=120%
GO_GLYCOPROTEIN_METABOLIC_PROCESS	GO_GLYCOPROTEIN_METABOLIC_PROCESS		22	-0.273043	-1.50976	0.0736196	0.534795	1	647	tags=82%, list=55%, signal=179%
GO_CELLULAR_RESPONSE_TO_CYTOKINE_STIMULUS	GO_CELLULAR_RESPONSE_TO_CYTOKINE_STIMULUS		44	-0.191311	-1.50437	0.0706107	0.532456	1	692	tags=77%, list=59%, signal=181%
GO_EMBRYO_DEVELOPMENT	GO_EMBRYO_DEVELOPMENT		58	-0.170653	-1.50253	0.0688976	0.522698	1	519	tags=60%, list=44%, signal=103%
GO_ANATOMICAL_STRUCTURE_FORMATION_INVOLVED_IN_MORPHOGENESIS	GO_ANATOMICAL_STRUCTURE_FORMATION_INVOLVED_IN_MORPHOGENESIS		69	-0.165204	-1.50147	0.0764588	0.511402	1	465	tags=55%, list=40%, signal=86%
GO_RESPONSE_TO_CALCIUM_ION	GO_RESPONSE_TO_CALCIUM_ION		16	-0.310773	-1.49946	0.0665323	0.503211	1	595	tags=81%, list=51%, signal=162%
GO_NEGATIVE_REGULATION_OF_TRANSCRIPTION_FROM_RNA_POLYMERASE_II_PROMOTER	GO_NEGATIVE_REGULATION_OF_TRANSCRIPTION_FROM_RNA_POLYMERASE_II_PROMOTER		47	-0.188412	-1.49945	0.0698152	0.490982	1	563	tags=66%, list=48%, signal=122%
GO_REGULATION_OF_RESPONSE_TO_STRESS	GO_REGULATION_OF_RESPONSE_TO_STRESS		97	-0.132757	-1.4982	0.0737052	0.481963	1	560	tags=60%, list=48%, signal=105%
GO_EMBRYONIC_MORPHOGENESIS	GO_EMBRYONIC_MORPHOGENESIS		29	-0.23379	-1.48807	0.0848485	0.491257	1	462	tags=62%, list=39%, signal=100%
GO_CELL_CELL_SIGNALING	GO_CELL_CELL_SIGNALING		37	-0.208491	-1.48078	0.0569106	0.495594	1	462	tags=59%, list=39%, signal=95%
GO_CIRCULATORY_SYSTEM_DEVELOPMENT	GO_CIRCULATORY_SYSTEM_DEVELOPMENT		66	-0.158599	-1.4788	0.0753564	0.489163	1	519	tags=59%, list=44%, signal=100%
GO_REGULATION_OF_CELLULAR_RESPONSE_TO_GROWTH_FACTOR_STIMULUS	GO_REGULATION_OF_CELLULAR_RESPONSE_TO_GROWTH_FACTOR_STIMULUS		23	-0.258716	-1.47064	0.0641283	0.495584	1	622	tags=78%, list=53%, signal=163%
GO_REGULATION_OF_RESPONSE_TO_EXTERNAL_STIMULUS	GO_REGULATION_OF_RESPONSE_TO_EXTERNAL_STIMULUS		77	-0.143662	-1.45415	0.0729167	0.518666	1	560	tags=61%, list=48%, signal=109%
GO_REGULATION_OF_EPITHELIAL_CELL_PROLIFERATION	GO_REGULATION_OF_EPITHELIAL_CELL_PROLIFERATION		25	-0.250096	-1.4403	0.0843621	0.538259	1	465	tags=64%, list=40%, signal=104%
GO_POSITIVE_REGULATION_OF_PROTEIN_SERINE_THREONINE_KINASE_ACTIVITY	GO_POSITIVE_REGULATION_OF_PROTEIN_SERINE_THREONINE_KINASE_ACTIVITY		19	-0.273502	-1.41998	0.0947581	0.575047	1	303	tags=53%, list=26%, signal=70%
GO_REGULATION_OF_MAP_KINASE_ACTIVITY	GO_REGULATION_OF_MAP_KINASE_ACTIVITY		32	-0.217437	-1.38977	0.120316	0.638261	1	303	tags=47%, list=26%, signal=61%
GO_POSITIVE_REGULATION_OF_IMMUNE_RESPONSE	GO_POSITIVE_REGULATION_OF_IMMUNE_RESPONSE		36	-0.198838	-1.38299	0.123364	0.643989	1	590	tags=69%, list=50%, signal=135%
GO_REGULATION_OF_GTPASE_ACTIVITY	GO_REGULATION_OF_GTPASE_ACTIVITY		35	-0.200928	-1.37748	0.114919	0.645467	1	443	tags=57%, list=38%, signal=89%
GO_NEGATIVE_REGULATION_OF_MAP_KINASE_ACTIVITY	GO_NEGATIVE_REGULATION_OF_MAP_KINASE_ACTIVITY		15	-0.285706	-1.37058	0.118852	0.651727	1	296	tags=53%, list=25%, signal=70%
GO_GLAND_DEVELOPMENT	GO_GLAND_DEVELOPMENT		37	-0.192351	-1.36516	0.118367	0.654637	1	639	tags=73%, list=54%, signal=155%
GO_DEFENSE_RESPONSE	GO_DEFENSE_RESPONSE		86	-0.128505	-1.36268	0.118257	0.64973	1	612	tags=64%, list=52%, signal=124%
GO_BLOOD_VESSEL_MORPHOGENESIS	GO_BLOOD_VESSEL_MORPHOGENESIS		35	-0.194858	-1.36172	0.12326	0.640715	1	517	tags=63%, list=44%, signal=109%
GO_HORMONE_METABOLIC_PROCESS	GO_HORMONE_METABOLIC_PROCESS		23	-0.23711	-1.36041	0.123288	0.632447	1	800	tags=91%, list=68%, signal=281%
GO_POSITIVE_REGULATION_OF_ERK1_AND_ERK2_CASCADE	GO_POSITIVE_REGULATION_OF_ERK1_AND_ERK2_CASCADE		26	-0.220785	-1.35938	0.143403	0.623977	1	470	tags=62%, list=40%, signal=100%
GO_ACTIVATION_OF_IMMUNE_RESPONSE	GO_ACTIVATION_OF_IMMUNE_RESPONSE		33	-0.200914	-1.35811	0.137097	0.616419	1	590	tags=70%, list=50%, signal=136%
GO_CYTOKINE_MEDIATED_SIGNALING_PATHWAY	GO_CYTOKINE_MEDIATED_SIGNALING_PATHWAY		31	-0.20639	-1.35762	0.130977	0.607621	1	674	tags=77%, list=57%, signal=177%
GO_ANGIOGENESIS	GO_ANGIOGENESIS		31	-0.206079	-1.35397	0.139165	0.606269	1	485	tags=61%, list=41%, signal=102%
GO_SENSORY_ORGAN_DEVELOPMENT	GO_SENSORY_ORGAN_DEVELOPMENT		33	-0.197275	-1.35219	0.126482	0.60041	1	523	tags=64%, list=45%, signal=112%
GO_MULTICELLULAR_ORGANISMAL_HOMEOSTASIS	GO_MULTICELLULAR_ORGANISMAL_HOMEOSTASIS		22	-0.241398	-1.35071	0.126984	0.594453	1	470	tags=64%, list=40%, signal=104%
GO_NEURON_DIFFERENTIATION	GO_NEURON_DIFFERENTIATION		54	-0.156911	-1.34449	0.113173	0.599725	1	434	tags=52%, list=37%, signal=78%
GO_CELL_MORPHOGENESIS_INVOLVED_IN_DIFFERENTIATION	GO_CELL_MORPHOGENESIS_INVOLVED_IN_DIFFERENTIATION		37	-0.18579	-1.3332	0.146091	0.616767	1	583	tags=68%, list=50%, signal=130%
GO_HEMOSTASIS	GO_HEMOSTASIS		24	-0.230217	-1.3229	0.157282	0.632009	1	470	tags=63%, list=40%, signal=102%
GO_VASCULATURE_DEVELOPMENT	GO_VASCULATURE_DEVELOPMENT		41	-0.174628	-1.32171	0.157143	0.625326	1	519	tags=61%, list=44%, signal=105%
GO_HEAD_DEVELOPMENT	GO_HEAD_DEVELOPMENT		44	-0.170636	-1.31276	0.152439	0.636817	1	662	tags=73%, list=56%, signal=161%
GO_DEVELOPMENTAL_GROWTH	GO_DEVELOPMENTAL_GROWTH		27	-0.213794	-1.28716	0.164948	0.691906	1	408	tags=56%, list=35%, signal=83%
GO_SKIN_DEVELOPMENT	GO_SKIN_DEVELOPMENT		17	-0.262698	-1.28688	0.153696	0.682702	1	802	tags=94%, list=68%, signal=293%
GO_RESPONSE_TO_ESTRADIOL	GO_RESPONSE_TO_ESTRADIOL		17	-0.266206	-1.28555	0.195777	0.676169	1	867	tags=100%, list=74%, signal=377%
GO_REGIONALIZATION	GO_REGIONALIZATION		15	-0.277538	-1.2825	0.174538	0.674017	1	462	tags=67%, list=39%, signal=109%
GO_NEGATIVE_REGULATION_OF_CELL_DIFFERENTIATION	GO_NEGATIVE_REGULATION_OF_CELL_DIFFERENTIATION		39	-0.176799	-1.28077	0.175197	0.668864	1	583	tags=67%, list=50%, signal=128%
GO_REGULATION_OF_BODY_FLUID_LEVELS	GO_REGULATION_OF_BODY_FLUID_LEVELS		45	-0.163665	-1.27266	0.18107	0.680796	1	338	tags=44%, list=29%, signal=60%
GO_EPITHELIUM_DEVELOPMENT	GO_EPITHELIUM_DEVELOPMENT		71	-0.130017	-1.26196	0.1611	0.698521	1	519	tags=56%, list=44%, signal=95%
GO_REGULATION_OF_CELL_SUBSTRATE_ADHESION	GO_REGULATION_OF_CELL_SUBSTRATE_ADHESION		19	-0.240237	-1.25681	0.202783	0.702301	1	465	tags=63%, list=40%, signal=103%
GO_REGULATION_OF_EPITHELIAL_CELL_MIGRATION	GO_REGULATION_OF_EPITHELIAL_CELL_MIGRATION		15	-0.27495	-1.25657	0.199203	0.693803	1	465	tags=67%, list=40%, signal=109%
GO_CELLULAR_AMINO_ACID_METABOLIC_PROCESS	GO_CELLULAR_AMINO_ACID_METABOLIC_PROCESS		28	-0.204562	-1.24831	0.184411	0.706136	1	689	tags=79%, list=59%, signal=186%
GO_POSITIVE_REGULATION_OF_GENE_EXPRESSION	GO_POSITIVE_REGULATION_OF_GENE_EXPRESSION		98	-0.112302	-1.24656	0.192308	0.701596	1	563	tags=58%, list=48%, signal=102%
GO_ACTIN_FILAMENT_ORGANIZATION	GO_ACTIN_FILAMENT_ORGANIZATION		16	-0.260794	-1.23883	0.20082	0.713349	1	286	tags=50%, list=24%, signal=65%
GO_RESPONSE_TO_INORGANIC_SUBSTANCE	GO_RESPONSE_TO_INORGANIC_SUBSTANCE		46	-0.156684	-1.23419	0.187621	0.717278	1	692	tags=74%, list=59%, signal=173%
GO_EYE_DEVELOPMENT	GO_EYE_DEVELOPMENT		19	-0.240237	-1.2336	0.199616	0.710103	1	465	tags=63%, list=40%, signal=103%
GO_CELL_FATE_COMMITMENT	GO_CELL_FATE_COMMITMENT		15	-0.261145	-1.2319	0.193858	0.705641	1	481	tags=67%, list=41%, signal=111%
GO_NEGATIVE_REGULATION_OF_DEVELOPMENTAL_PROCESS	GO_NEGATIVE_REGULATION_OF_DEVELOPMENTAL_PROCESS		59	-0.138421	-1.22418	0.208748	0.716617	1	563	tags=61%, list=48%, signal=111%
GO_PATTERN_SPECIFICATION_PROCESS	GO_PATTERN_SPECIFICATION_PROCESS		19	-0.240237	-1.22285	0.223577	0.711281	1	465	tags=63%, list=40%, signal=103%
GO_DEVELOPMENTAL_PROCESS_INVOLVED_IN_REPRODUCTION	GO_DEVELOPMENTAL_PROCESS_INVOLVED_IN_REPRODUCTION		39	-0.166226	-1.21423	0.231884	0.724143	1	595	tags=67%, list=51%, signal=131%
GO_ION_TRANSMEMBRANE_TRANSPORT	GO_ION_TRANSMEMBRANE_TRANSPORT		55	-0.142286	-1.20846	0.223849	0.731024	1	226	tags=33%, list=19%, signal=39%
GO_RESPONSE_TO_METAL_ION	GO_RESPONSE_TO_METAL_ION		35	-0.17035	-1.19536	0.235169	0.756579	1	612	tags=69%, list=52%, signal=139%
GO_REGULATION_OF_SECRETION	GO_REGULATION_OF_SECRETION		53	-0.138825	-1.19498	0.230769	0.749023	1	377	tags=45%, list=32%, signal=64%
GO_POSITIVE_REGULATION_OF_CELL_MORPHOGENESIS_INVOLVED_IN_DIFFERENTIATION	GO_POSITIVE_REGULATION_OF_CELL_MORPHOGENESIS_INVOLVED_IN_DIFFERENTIATION		16	-0.249676	-1.18667	0.261663	0.762033	1	519	tags=69%, list=44%, signal=122%
GO_BONE_DEVELOPMENT	GO_BONE_DEVELOPMENT		19	-0.230166	-1.17646	0.23855	0.780031	1	662	tags=79%, list=56%, signal=178%
GO_RESPONSE_TO_GROWTH_FACTOR	GO_RESPONSE_TO_GROWTH_FACTOR		54	-0.140146	-1.17592	0.230916	0.773078	1	518	tags=57%, list=44%, signal=98%
GO_POSITIVE_REGULATION_OF_RESPONSE_TO_STIMULUS	GO_POSITIVE_REGULATION_OF_RESPONSE_TO_STIMULUS		145	-0.0897356	-1.17268	0.265136	0.772912	1	524	tags=52%, list=45%, signal=83%
GO_HOMEOSTASIS_OF_NUMBER_OF_CELLS	GO_HOMEOSTASIS_OF_NUMBER_OF_CELLS		17	-0.230515	-1.17219	0.25	0.765957	1	563	tags=71%, list=48%, signal=134%
GO_NEGATIVE_REGULATION_OF_CELL_COMMUNICATION	GO_NEGATIVE_REGULATION_OF_CELL_COMMUNICATION		94	-0.108826	-1.17107	0.252485	0.760716	1	433	tags=47%, list=37%, signal=68%
GO_EAR_DEVELOPMENT	GO_EAR_DEVELOPMENT		16	-0.246222	-1.16536	0.27	0.767386	1	523	tags=69%, list=45%, signal=122%
GO_RESPONSE_TO_VIRUS	GO_RESPONSE_TO_VIRUS		17	-0.236565	-1.16275	0.270541	0.766043	1	556	tags=71%, list=47%, signal=132%
GO_WNT_SIGNALING_PATHWAY	GO_WNT_SIGNALING_PATHWAY		15	-0.253379	-1.15868	0.258317	0.768544	1	490	tags=67%, list=42%, signal=113%
GO_REGULATION_OF_RESPONSE_TO_WOUNDING	GO_REGULATION_OF_RESPONSE_TO_WOUNDING		46	-0.147202	-1.15152	0.262195	0.779564	1	473	tags=54%, list=40%, signal=87%
GO_NEGATIVE_REGULATION_OF_PROTEIN_SERINE_THREONINE_KINASE_ACTIVITY	GO_NEGATIVE_REGULATION_OF_PROTEIN_SERINE_THREONINE_KINASE_ACTIVITY		18	-0.232699	-1.15065	0.26839	0.773756	1	319	tags=50%, list=27%, signal=68%
GO_ENZYME_LINKED_RECEPTOR_PROTEIN_SIGNALING_PATHWAY	GO_ENZYME_LINKED_RECEPTOR_PROTEIN_SIGNALING_PATHWAY		60	-0.133094	-1.14972	0.311765	0.768392	1	518	tags=57%, list=44%, signal=96%
GO_REGULATION_OF_SYSTEM_PROCESS	GO_REGULATION_OF_SYSTEM_PROCESS		40	-0.153395	-1.14361	0.281553	0.776663	1	326	tags=43%, list=28%, signal=57%
GO_RESPONSE_TO_CARBOHYDRATE	GO_RESPONSE_TO_CARBOHYDRATE		23	-0.199486	-1.14286	0.290323	0.770942	1	486	tags=61%, list=41%, signal=102%
GO_CELL_SUBSTRATE_ADHESION	GO_CELL_SUBSTRATE_ADHESION		17	-0.231176	-1.1402	0.291985	0.769952	1	286	tags=47%, list=24%, signal=61%
GO_GROWTH	GO_GROWTH		34	-0.168473	-1.1357	0.297189	0.774093	1	465	tags=56%, list=40%, signal=90%
GO_RESPONSE_TO_TRANSFORMING_GROWTH_FACTOR_BETA	GO_RESPONSE_TO_TRANSFORMING_GROWTH_FACTOR_BETA		17	-0.233921	-1.13514	0.283702	0.768289	1	490	tags=65%, list=42%, signal=109%
GO_IN_UTERO_EMBRYONIC_DEVELOPMENT	GO_IN_UTERO_EMBRYONIC_DEVELOPMENT		20	-0.212392	-1.13488	0.273834	0.761738	1	519	tags=65%, list=44%, signal=115%
GO_RNA_PROCESSING	GO_RNA_PROCESSING		15	-0.240495	-1.12048	0.325349	0.792273	1	818	tags=93%, list=70%, signal=304%
GO_TISSUE_DEVELOPMENT	GO_TISSUE_DEVELOPMENT		108	-0.09532	-1.11562	0.30426	0.797404	1	519	tags=53%, list=44%, signal=86%
GO_REGULATION_OF_PROTEIN_SERINE_THREONINE_KINASE_ACTIVITY	GO_REGULATION_OF_PROTEIN_SERINE_THREONINE_KINASE_ACTIVITY		41	-0.148968	-1.11436	0.285714	0.793512	1	319	tags=41%, list=27%, signal=55%
GO_TRANSMEMBRANE_RECEPTOR_PROTEIN_TYROSINE_KINASE_SIGNALING_PATHWAY	GO_TRANSMEMBRANE_RECEPTOR_PROTEIN_TYROSINE_KINASE_SIGNALING_PATHWAY		44	-0.143765	-1.11407	0.282258	0.787129	1	639	tags=68%, list=54%, signal=144%
GO_EPITHELIAL_CELL_DIFFERENTIATION	GO_EPITHELIAL_CELL_DIFFERENTIATION		41	-0.149355	-1.10837	0.330612	0.794156	1	519	tags=59%, list=44%, signal=101%
GO_G_PROTEIN_COUPLED_RECEPTOR_SIGNALING_PATHWAY	GO_G_PROTEIN_COUPLED_RECEPTOR_SIGNALING_PATHWAY		29	-0.177082	-1.1055	0.298969	0.794226	1	365	tags=48%, list=31%, signal=68%
GO_REGULATION_OF_CELL_DIFFERENTIATION	GO_REGULATION_OF_CELL_DIFFERENTIATION		98	-0.100277	-1.10321	0.334008	0.793235	1	540	tags=55%, list=46%, signal=94%
GO_CENTRAL_NERVOUS_SYSTEM_DEVELOPMENT	GO_CENTRAL_NERVOUS_SYSTEM_DEVELOPMENT		51	-0.130603	-1.10169	0.329341	0.790674	1	637	tags=67%, list=54%, signal=139%
GO_SENSORY_ORGAN_MORPHOGENESIS	GO_SENSORY_ORGAN_MORPHOGENESIS		16	-0.232945	-1.10008	0.322709	0.787604	1	465	tags=63%, list=40%, signal=102%
GO_REGULATION_OF_WNT_SIGNALING_PATHWAY	GO_REGULATION_OF_WNT_SIGNALING_PATHWAY		15	-0.240035	-1.10001	0.305668	0.781086	1	662	tags=80%, list=56%, signal=181%
GO_CELLULAR_LIPID_CATABOLIC_PROCESS	GO_CELLULAR_LIPID_CATABOLIC_PROCESS		20	-0.207279	-1.09788	0.343254	0.779473	1	701	tags=80%, list=60%, signal=195%
GO_REGULATION_OF_HEMOPOIESIS	GO_REGULATION_OF_HEMOPOIESIS		15	-0.234628	-1.09664	0.345631	0.775911	1	590	tags=73%, list=50%, signal=146%
GO_HEPATICOBILIARY_SYSTEM_DEVELOPMENT	GO_HEPATICOBILIARY_SYSTEM_DEVELOPMENT		17	-0.220855	-1.09645	0.314563	0.769769	1	367	tags=53%, list=31%, signal=76%
GO_REGULATION_OF_CELLULAR_COMPONENT_MOVEMENT	GO_REGULATION_OF_CELLULAR_COMPONENT_MOVEMENT		67	-0.114509	-1.09164	0.332689	0.775427	1	470	tags=51%, list=40%, signal=80%
GO_POSITIVE_REGULATION_OF_TRANSCRIPTION_FROM_RNA_POLYMERASE_II_PROMOTER	GO_POSITIVE_REGULATION_OF_TRANSCRIPTION_FROM_RNA_POLYMERASE_II_PROMOTER		57	-0.123796	-1.09132	0.346723	0.769802	1	563	tags=60%, list=48%, signal=109%
GO_REGULATION_OF_TRANSMEMBRANE_RECEPTOR_PROTEIN_SERINE_THREONINE_KINASE_SIGNALING_PATHWAY	GO_REGULATION_OF_TRANSMEMBRANE_RECEPTOR_PROTEIN_SERINE_THREONINE_KINASE_SIGNALING_PATHWAY		17	-0.220855	-1.08705	0.344262	0.773875	1	367	tags=53%, list=31%, signal=76%
GO_REGULATION_OF_MULTICELLULAR_ORGANISMAL_DEVELOPMENT	GO_REGULATION_OF_MULTICELLULAR_ORGANISMAL_DEVELOPMENT		106	-0.0944986	-1.08181	0.36255	0.780371	1	476	tags=49%, list=41%, signal=75%
GO_GLYCEROPHOSPHOLIPID_METABOLIC_PROCESS	GO_GLYCEROPHOSPHOLIPID_METABOLIC_PROCESS		29	-0.166481	-1.08033	0.35534	0.777645	1	701	tags=76%, list=60%, signal=184%
GO_NEGATIVE_REGULATION_OF_MAPK_CASCADE	GO_NEGATIVE_REGULATION_OF_MAPK_CASCADE		23	-0.187172	-1.0663	0.357294	0.805502	1	296	tags=43%, list=25%, signal=57%
GO_MUSCLE_CONTRACTION	GO_MUSCLE_CONTRACTION		15	-0.230371	-1.0657	0.342857	0.800731	1	908	tags=100%, list=77%, signal=436%
GO_PROTEIN_DEPHOSPHORYLATION	GO_PROTEIN_DEPHOSPHORYLATION		16	-0.220315	-1.06155	0.365269	0.804736	1	553	tags=69%, list=47%, signal=128%
GO_REGULATION_OF_TRANSCRIPTION_FROM_RNA_POLYMERASE_II_PROMOTER	GO_REGULATION_OF_TRANSCRIPTION_FROM_RNA_POLYMERASE_II_PROMOTER		101	-0.0937134	-1.05408	0.384289	0.817263	1	563	tags=56%, list=48%, signal=99%
GO_NEUROGENESIS	GO_NEUROGENESIS		88	-0.100703	-1.05325	0.394942	0.813002	1	532	tags=55%, list=45%, signal=92%
GO_ALPHA_AMINO_ACID_METABOLIC_PROCESS	GO_ALPHA_AMINO_ACID_METABOLIC_PROCESS		25	-0.177755	-1.04564	0.360845	0.82572	1	689	tags=76%, list=59%, signal=180%
GO_MUSCLE_STRUCTURE_DEVELOPMENT	GO_MUSCLE_STRUCTURE_DEVELOPMENT		25	-0.177824	-1.04083	0.395257	0.831329	1	595	tags=68%, list=51%, signal=135%
GO_EPIDERMIS_DEVELOPMENT	GO_EPIDERMIS_DEVELOPMENT		17	-0.207738	-1.04026	0.411992	0.826539	1	175	tags=35%, list=15%, signal=41%
GO_RESPONSE_TO_PURINE_CONTAINING_COMPOUND	GO_RESPONSE_TO_PURINE_CONTAINING_COMPOUND		22	-0.187658	-1.03947	0.395303	0.82227	1	692	tags=77%, list=59%, signal=185%
GO_ANION_TRANSMEMBRANE_TRANSPORT	GO_ANION_TRANSMEMBRANE_TRANSPORT		23	-0.187096	-1.0352	0.431174	0.826614	1	194	tags=35%, list=17%, signal=41%
GO_POSITIVE_REGULATION_OF_CELL_ADHESION	GO_POSITIVE_REGULATION_OF_CELL_ADHESION		29	-0.160458	-1.03098	0.4	0.830873	1	465	tags=55%, list=40%, signal=89%
GO_EMBRYO_DEVELOPMENT_ENDING_IN_BIRTH_OR_EGG_HATCHING	GO_EMBRYO_DEVELOPMENT_ENDING_IN_BIRTH_OR_EGG_HATCHING		32	-0.156797	-1.02905	0.407708	0.829217	1	519	tags=59%, list=44%, signal=104%
GO_POSITIVE_REGULATION_OF_LOCOMOTION	GO_POSITIVE_REGULATION_OF_LOCOMOTION		40	-0.139374	-1.01958	0.404175	0.846574	1	518	tags=58%, list=44%, signal=99%
GO_ACTIN_FILAMENT_BASED_PROCESS	GO_ACTIN_FILAMENT_BASED_PROCESS		36	-0.144259	-1.0182	0.413793	0.843752	1	326	tags=42%, list=28%, signal=56%
GO_NEGATIVE_REGULATION_OF_KINASE_ACTIVITY	GO_NEGATIVE_REGULATION_OF_KINASE_ACTIVITY		29	-0.160036	-1.00966	0.449799	0.85825	1	425	tags=52%, list=36%, signal=79%
GO_EMBRYONIC_ORGAN_MORPHOGENESIS	GO_EMBRYONIC_ORGAN_MORPHOGENESIS		17	-0.198434	-1.00684	0.427992	0.858907	1	462	tags=59%, list=39%, signal=96%
GO_REGULATION_OF_PROTEIN_BINDING	GO_REGULATION_OF_PROTEIN_BINDING		18	-0.205786	-1.00639	0.428287	0.853931	1	611	tags=72%, list=52%, signal=148%
GO_TRANSCRIPTION_FROM_RNA_POLYMERASE_II_PROMOTER	GO_TRANSCRIPTION_FROM_RNA_POLYMERASE_II_PROMOTER		29	-0.158681	-1.00462	0.439068	0.852229	1	548	tags=62%, list=47%, signal=114%
GO_GLYCEROLIPID_METABOLIC_PROCESS	GO_GLYCEROLIPID_METABOLIC_PROCESS		37	-0.137821	-1.00166	0.438224	0.853863	1	701	tags=73%, list=60%, signal=175%
GO_GLUCOSE_METABOLIC_PROCESS	GO_GLUCOSE_METABOLIC_PROCESS		15	-0.21415	-1.00048	0.459959	0.850749	1	692	tags=80%, list=59%, signal=192%
GO_REGULATION_OF_MAPK_CASCADE	GO_REGULATION_OF_MAPK_CASCADE		70	-0.106884	-0.998061	0.436709	0.850697	1	470	tags=50%, list=40%, signal=78%
GO_POSITIVE_REGULATION_OF_RESPONSE_TO_EXTERNAL_STIMULUS	GO_POSITIVE_REGULATION_OF_RESPONSE_TO_EXTERNAL_STIMULUS		23	-0.177237	-0.997442	0.436893	0.846472	1	971	tags=100%, list=83%, signal=567%
GO_MUSCLE_SYSTEM_PROCESS	GO_MUSCLE_SYSTEM_PROCESS		21	-0.183083	-0.994636	0.44294	0.847567	1	908	tags=95%, list=77%, signal=413%
GO_REGULATION_OF_INTRACELLULAR_TRANSPORT	GO_REGULATION_OF_INTRACELLULAR_TRANSPORT		45	-0.126425	-0.994277	0.437137	0.84271	1	954	tags=93%, list=81%, signal=479%
GO_LIPID_CATABOLIC_PROCESS	GO_LIPID_CATABOLIC_PROCESS		30	-0.154779	-0.993601	0.456175	0.83867	1	724	tags=77%, list=62%, signal=195%
GO_NEGATIVE_REGULATION_OF_RESPONSE_TO_STIMULUS	GO_NEGATIVE_REGULATION_OF_RESPONSE_TO_STIMULUS		101	-0.0874388	-0.993447	0.440789	0.833524	1	407	tags=43%, list=35%, signal=60%
GO_REGULATION_OF_KINASE_ACTIVITY	GO_REGULATION_OF_KINASE_ACTIVITY		64	-0.110135	-0.986206	0.470135	0.844719	1	319	tags=38%, list=27%, signal=49%
GO_LIPID_MODIFICATION	GO_LIPID_MODIFICATION		23	-0.170098	-0.984692	0.456075	0.842736	1	724	tags=78%, list=62%, signal=200%
GO_CIRCADIAN_RHYTHM	GO_CIRCADIAN_RHYTHM		21	-0.176475	-0.982	0.456612	0.843716	1	692	tags=76%, list=59%, signal=182%
GO_REGULATION_OF_BINDING	GO_REGULATION_OF_BINDING		24	-0.168841	-0.98146	0.452525	0.839562	1	883	tags=92%, list=75%, signal=362%
GO_SENSORY_PERCEPTION	GO_SENSORY_PERCEPTION		27	-0.158029	-0.976645	0.471888	0.845254	1	385	tags=48%, list=33%, signal=70%
GO_TRANSMEMBRANE_TRANSPORT	GO_TRANSMEMBRANE_TRANSPORT		72	-0.100474	-0.976304	0.445135	0.840553	1	249	tags=31%, list=21%, signal=36%
GO_POSITIVE_REGULATION_OF_PROTEIN_SECRETION	GO_POSITIVE_REGULATION_OF_PROTEIN_SECRETION		15	-0.208743	-0.970878	0.467197	0.848092	1	620	tags=73%, list=53%, signal=153%
GO_REGULATION_OF_INFLAMMATORY_RESPONSE	GO_REGULATION_OF_INFLAMMATORY_RESPONSE		31	-0.150312	-0.970406	0.457256	0.843877	1	473	tags=55%, list=40%, signal=89%
GO_CARBOHYDRATE_DERIVATIVE_BIOSYNTHETIC_PROCESS	GO_CARBOHYDRATE_DERIVATIVE_BIOSYNTHETIC_PROCESS		46	-0.121608	-0.967586	0.472617	0.845076	1	655	tags=67%, list=56%, signal=146%
GO_NEGATIVE_REGULATION_OF_SECRETION	GO_NEGATIVE_REGULATION_OF_SECRETION		19	-0.182411	-0.964987	0.464762	0.845965	1	470	tags=58%, list=40%, signal=95%
GO_REGULATION_OF_CELL_ADHESION	GO_REGULATION_OF_CELL_ADHESION		45	-0.1205	-0.960676	0.488	0.850518	1	465	tags=51%, list=40%, signal=81%
GO_POSITIVE_REGULATION_OF_KINASE_ACTIVITY	GO_POSITIVE_REGULATION_OF_KINASE_ACTIVITY		36	-0.135813	-0.956363	0.499006	0.854794	1	303	tags=39%, list=26%, signal=51%
GO_CONNECTIVE_TISSUE_DEVELOPMENT	GO_CONNECTIVE_TISSUE_DEVELOPMENT		16	-0.196351	-0.956294	0.495935	0.849785	1	434	tags=56%, list=37%, signal=88%
GO_CELL_ACTIVATION	GO_CELL_ACTIVATION		36	-0.132347	-0.955946	0.487179	0.845501	1	470	tags=53%, list=40%, signal=85%
GO_RESPONSE_TO_NUTRIENT	GO_RESPONSE_TO_NUTRIENT		27	-0.154768	-0.953659	0.502846	0.845347	1	954	tags=96%, list=81%, signal=502%
GO_CIRCULATORY_SYSTEM_PROCESS	GO_CIRCULATORY_SYSTEM_PROCESS		39	-0.130035	-0.952064	0.493042	0.843796	1	907	tags=90%, list=77%, signal=381%
GO_NEGATIVE_REGULATION_OF_PROTEIN_METABOLIC_PROCESS	GO_NEGATIVE_REGULATION_OF_PROTEIN_METABOLIC_PROCESS		89	-0.0895045	-0.943087	0.529528	0.858565	1	326	tags=36%, list=28%, signal=46%
GO_POSITIVE_REGULATION_OF_CELL_COMMUNICATION	GO_POSITIVE_REGULATION_OF_CELL_COMMUNICATION		113	-0.0791956	-0.936039	0.524008	0.869469	1	478	tags=48%, list=41%, signal=73%
GO_RESPONSE_TO_STEROID_HORMONE	GO_RESPONSE_TO_STEROID_HORMONE		44	-0.119429	-0.931508	0.521154	0.874678	1	960	tags=93%, list=82%, signal=492%
GO_NEGATIVE_REGULATION_OF_GROWTH	GO_NEGATIVE_REGULATION_OF_GROWTH		20	-0.171404	-0.927594	0.505133	0.878479	1	625	tags=70%, list=53%, signal=147%
GO_VASCULAR_PROCESS_IN_CIRCULATORY_SYSTEM	GO_VASCULAR_PROCESS_IN_CIRCULATORY_SYSTEM		23	-0.164998	-0.927115	0.515528	0.874434	1	883	tags=91%, list=75%, signal=361%
GO_SIGNAL_TRANSDUCTION_BY_PROTEIN_PHOSPHORYLATION	GO_SIGNAL_TRANSDUCTION_BY_PROTEIN_PHOSPHORYLATION		26	-0.153176	-0.926632	0.563894	0.870573	1	954	tags=96%, list=81%, signal=502%
GO_NEGATIVE_REGULATION_OF_HYDROLASE_ACTIVITY	GO_NEGATIVE_REGULATION_OF_HYDROLASE_ACTIVITY		33	-0.137545	-0.918014	0.539216	0.884902	1	520	tags=58%, list=44%, signal=100%
GO_CELL_CELL_ADHESION	GO_CELL_CELL_ADHESION		36	-0.131273	-0.917862	0.538	0.880221	1	406	tags=47%, list=35%, signal=70%
GO_REGULATION_OF_DEVELOPMENTAL_GROWTH	GO_REGULATION_OF_DEVELOPMENTAL_GROWTH		28	-0.143917	-0.914596	0.537525	0.88236	1	465	tags=54%, list=40%, signal=87%
GO_REGULATION_OF_CELL_DEVELOPMENT	GO_REGULATION_OF_CELL_DEVELOPMENT		55	-0.104883	-0.909587	0.558468	0.888388	1	524	tags=55%, list=45%, signal=94%
GO_REGULATION_OF_CELL_PROLIFERATION	GO_REGULATION_OF_CELL_PROLIFERATION		109	-0.0764957	-0.899815	0.558416	0.904577	1	555	tags=54%, list=47%, signal=93%
GO_REGULATION_OF_CELL_PROJECTION_ORGANIZATION	GO_REGULATION_OF_CELL_PROJECTION_ORGANIZATION		40	-0.123721	-0.89794	0.564356	0.903669	1	389	tags=45%, list=33%, signal=65%
GO_RESPONSE_TO_BACTERIUM	GO_RESPONSE_TO_BACTERIUM		37	-0.127766	-0.894488	0.591549	0.905959	1	998	tags=97%, list=85%, signal=629%
GO_CELLULAR_RESPONSE_TO_ORGANIC_SUBSTANCE	GO_CELLULAR_RESPONSE_TO_ORGANIC_SUBSTANCE		147	-0.0680471	-0.892732	0.596708	0.905023	1	586	tags=56%, list=50%, signal=97%
GO_CELLULAR_COMPONENT_MORPHOGENESIS	GO_CELLULAR_COMPONENT_MORPHOGENESIS		57	-0.103206	-0.885721	0.557769	0.914538	1	586	tags=60%, list=50%, signal=113%
GO_RHYTHMIC_PROCESS	GO_RHYTHMIC_PROCESS		31	-0.134225	-0.882049	0.607143	0.917729	1	605	tags=65%, list=52%, signal=130%
GO_GENERATION_OF_PRECURSOR_METABOLITES_AND_ENERGY	GO_GENERATION_OF_PRECURSOR_METABOLITES_AND_ENERGY		21	-0.160864	-0.878406	0.587669	0.920539	1	710	tags=76%, list=60%, signal=189%
GO_REGULATION_OF_PROTEIN_MODIFICATION_PROCESS	GO_REGULATION_OF_PROTEIN_MODIFICATION_PROCESS		126	-0.0713074	-0.878249	0.603448	0.915987	1	476	tags=47%, list=41%, signal=70%
GO_CELLULAR_PROTEIN_COMPLEX_ASSEMBLY	GO_CELLULAR_PROTEIN_COMPLEX_ASSEMBLY		17	-0.177538	-0.875435	0.605108	0.917048	1	279	tags=41%, list=24%, signal=53%
GO_POSITIVE_REGULATION_OF_LIPID_METABOLIC_PROCESS	GO_POSITIVE_REGULATION_OF_LIPID_METABOLIC_PROCESS		17	-0.178708	-0.871836	0.618147	0.91976	1	692	tags=76%, list=59%, signal=184%
GO_ORGANONITROGEN_COMPOUND_CATABOLIC_PROCESS	GO_ORGANONITROGEN_COMPOUND_CATABOLIC_PROCESS		34	-0.126522	-0.871012	0.596774	0.916591	1	720	tags=74%, list=61%, signal=185%
GO_LEUKOCYTE_MIGRATION	GO_LEUKOCYTE_MIGRATION		16	-0.179188	-0.867085	0.580972	0.920393	1	674	tags=75%, list=57%, signal=174%
GO_SEX_DIFFERENTIATION	GO_SEX_DIFFERENTIATION		16	-0.184046	-0.866252	0.628	0.917281	1	595	tags=69%, list=51%, signal=138%
GO_POSITIVE_REGULATION_OF_DEVELOPMENTAL_PROCESS	GO_POSITIVE_REGULATION_OF_DEVELOPMENTAL_PROCESS		90	-0.0809758	-0.860575	0.62572	0.924425	1	435	tags=44%, list=37%, signal=65%
GO_RESPONSE_TO_ENDOPLASMIC_RETICULUM_STRESS	GO_RESPONSE_TO_ENDOPLASMIC_RETICULUM_STRESS		17	-0.171641	-0.854958	0.653527	0.93112	1	493	tags=59%, list=42%, signal=100%
GO_POSITIVE_REGULATION_OF_MULTICELLULAR_ORGANISMAL_PROCESS	GO_POSITIVE_REGULATION_OF_MULTICELLULAR_ORGANISMAL_PROCESS		115	-0.0720204	-0.854928	0.662028	0.926382	1	476	tags=47%, list=41%, signal=71%
GO_RESPONSE_TO_BIOTIC_STIMULUS	GO_RESPONSE_TO_BIOTIC_STIMULUS		63	-0.0922235	-0.849078	0.675097	0.933781	1	998	tags=94%, list=85%, signal=591%
GO_NEURON_DEVELOPMENT	GO_NEURON_DEVELOPMENT		42	-0.111349	-0.848239	0.664609	0.930667	1	434	tags=48%, list=37%, signal=73%
GO_REGULATION_OF_GROWTH	GO_REGULATION_OF_GROWTH		55	-0.0977009	-0.840248	0.661597	0.942397	1	468	tags=49%, list=40%, signal=78%
GO_INTRACELLULAR_SIGNAL_TRANSDUCTION	GO_INTRACELLULAR_SIGNAL_TRANSDUCTION		106	-0.07132	-0.835302	0.644033	0.947614	1	977	tags=90%, list=83%, signal=486%
GO_NEGATIVE_REGULATION_OF_CELL_DEVELOPMENT	GO_NEGATIVE_REGULATION_OF_CELL_DEVELOPMENT		20	-0.157192	-0.835086	0.642715	0.943285	1	524	tags=60%, list=45%, signal=107%
GO_CARBOHYDRATE_DERIVATIVE_METABOLIC_PROCESS	GO_CARBOHYDRATE_DERIVATIVE_METABOLIC_PROCESS		77	-0.0809291	-0.833757	0.667343	0.941184	1	949	tags=88%, list=81%, signal=431%
GO_PEPTIDYL_AMINO_ACID_MODIFICATION	GO_PEPTIDYL_AMINO_ACID_MODIFICATION		42	-0.109456	-0.833286	0.654649	0.937477	1	520	tags=55%, list=44%, signal=95%
GO_POSITIVE_REGULATION_OF_GROWTH	GO_POSITIVE_REGULATION_OF_GROWTH		18	-0.162822	-0.828886	0.661323	0.941575	1	465	tags=56%, list=40%, signal=91%
GO_REGULATION_OF_IMMUNE_RESPONSE	GO_REGULATION_OF_IMMUNE_RESPONSE		51	-0.0976551	-0.818707	0.724696	0.95691	1	674	tags=67%, list=57%, signal=150%
GO_REGULATION_OF_HYDROLASE_ACTIVITY	GO_REGULATION_OF_HYDROLASE_ACTIVITY		78	-0.0801984	-0.812733	0.698381	0.963697	1	470	tags=47%, list=40%, signal=74%
GO_FOREBRAIN_DEVELOPMENT	GO_FOREBRAIN_DEVELOPMENT		24	-0.13942	-0.810849	0.700197	0.962539	1	819	tags=83%, list=70%, signal=270%
GO_GLYCEROLIPID_BIOSYNTHETIC_PROCESS	GO_GLYCEROLIPID_BIOSYNTHETIC_PROCESS		23	-0.143089	-0.81059	0.68323	0.958312	1	653	tags=70%, list=56%, signal=154%
GO_MONOSACCHARIDE_METABOLIC_PROCESS	GO_MONOSACCHARIDE_METABOLIC_PROCESS		22	-0.141335	-0.801475	0.706897	0.971368	1	692	tags=73%, list=59%, signal=174%
GO_SKELETAL_SYSTEM_DEVELOPMENT	GO_SKELETAL_SYSTEM_DEVELOPMENT		34	-0.117234	-0.8014	0.709163	0.966827	1	627	tags=65%, list=53%, signal=135%
GO_ORGANIC_ACID_CATABOLIC_PROCESS	GO_ORGANIC_ACID_CATABOLIC_PROCESS		26	-0.135017	-0.799799	0.681188	0.965282	1	1020	tags=100%, list=87%, signal=745%
GO_TELENCEPHALON_DEVELOPMENT	GO_TELENCEPHALON_DEVELOPMENT		15	-0.173138	-0.794244	0.71124	0.971219	1	583	tags=67%, list=50%, signal=131%
GO_POSITIVE_REGULATION_OF_CELL_PROLIFERATION	GO_POSITIVE_REGULATION_OF_CELL_PROLIFERATION		65	-0.085746	-0.791973	0.728713	0.970813	1	520	tags=52%, list=44%, signal=89%
GO_CELL_JUNCTION_ORGANIZATION	GO_CELL_JUNCTION_ORGANIZATION		15	-0.169111	-0.790174	0.73055	0.969615	1	979	tags=100%, list=83%, signal=594%
GO_RESPONSE_TO_MOLECULE_OF_BACTERIAL_ORIGIN	GO_RESPONSE_TO_MOLECULE_OF_BACTERIAL_ORIGIN		31	-0.121723	-0.787089	0.710417	0.970714	1	998	tags=97%, list=85%, signal=628%
GO_REGULATION_OF_NEURON_DIFFERENTIATION	GO_REGULATION_OF_NEURON_DIFFERENTIATION		36	-0.113552	-0.784829	0.722892	0.970377	1	524	tags=56%, list=45%, signal=97%
GO_POSITIVE_REGULATION_OF_INTRACELLULAR_SIGNAL_TRANSDUCTION	GO_POSITIVE_REGULATION_OF_INTRACELLULAR_SIGNAL_TRANSDUCTION		76	-0.0793308	-0.783293	0.756335	0.968722	1	470	tags=47%, list=40%, signal=74%
GO_NEGATIVE_REGULATION_OF_PHOSPHORUS_METABOLIC_PROCESS	GO_NEGATIVE_REGULATION_OF_PHOSPHORUS_METABOLIC_PROCESS		48	-0.0946196	-0.777411	0.743028	0.974964	1	457	tags=48%, list=39%, signal=75%
GO_POSITIVE_REGULATION_OF_CELL_DEATH	GO_POSITIVE_REGULATION_OF_CELL_DEATH		52	-0.0936857	-0.775914	0.727273	0.97292	1	957	tags=90%, list=82%, signal=467%
GO_REGULATION_OF_IMMUNE_EFFECTOR_PROCESS	GO_REGULATION_OF_IMMUNE_EFFECTOR_PROCESS		28	-0.126278	-0.770967	0.758416	0.977192	1	611	tags=64%, list=52%, signal=131%
GO_NEURON_PROJECTION_DEVELOPMENT	GO_NEURON_PROJECTION_DEVELOPMENT		33	-0.114041	-0.768258	0.77439	0.977412	1	867	tags=85%, list=74%, signal=315%
GO_RESPONSE_TO_CORTICOSTEROID	GO_RESPONSE_TO_CORTICOSTEROID		20	-0.140641	-0.766571	0.766129	0.975982	1	954	tags=95%, list=81%, signal=498%
GO_CELLULAR_MACROMOLECULE_LOCALIZATION	GO_CELLULAR_MACROMOLECULE_LOCALIZATION		59	-0.0876643	-0.763618	0.736308	0.976567	1	540	tags=54%, list=46%, signal=95%
GO_AMEBOIDAL_TYPE_CELL_MIGRATION	GO_AMEBOIDAL_TYPE_CELL_MIGRATION		15	-0.162554	-0.755951	0.745968	0.985082	1	517	tags=60%, list=44%, signal=106%
GO_POSITIVE_REGULATION_OF_HOMEOSTATIC_PROCESS	GO_POSITIVE_REGULATION_OF_HOMEOSTATIC_PROCESS		15	-0.163244	-0.753026	0.757143	0.985587	1	751	tags=80%, list=64%, signal=219%
GO_NEGATIVE_REGULATION_OF_PHOSPHORYLATION	GO_NEGATIVE_REGULATION_OF_PHOSPHORYLATION		43	-0.100837	-0.750172	0.796371	0.9861	1	433	tags=47%, list=37%, signal=71%
GO_POSITIVE_REGULATION_OF_CELL_PROJECTION_ORGANIZATION	GO_POSITIVE_REGULATION_OF_CELL_PROJECTION_ORGANIZATION		24	-0.130507	-0.748763	0.782	0.984068	1	389	tags=46%, list=33%, signal=67%
GO_REGULATION_OF_WOUND_HEALING	GO_REGULATION_OF_WOUND_HEALING		16	-0.155656	-0.73739	0.783439	0.998759	1	261	tags=38%, list=22%, signal=48%
GO_TERPENOID_METABOLIC_PROCESS	GO_TERPENOID_METABOLIC_PROCESS		15	-0.155939	-0.735106	0.801217	0.997934	1	916	tags=93%, list=78%, signal=419%
GO_REGULATION_OF_CELL_GROWTH	GO_REGULATION_OF_CELL_GROWTH		32	-0.110004	-0.73207	0.794466	0.998571	1	389	tags=44%, list=33%, signal=64%
GO_WOUND_HEALING	GO_WOUND_HEALING		35	-0.105406	-0.731451	0.790698	0.995119	1	317	tags=37%, list=27%, signal=49%
GO_CELL_PROLIFERATION	GO_CELL_PROLIFERATION		51	-0.0868472	-0.729486	0.815353	0.993881	1	525	tags=53%, list=45%, signal=92%
GO_NEGATIVE_REGULATION_OF_MULTICELLULAR_ORGANISMAL_PROCESS	GO_NEGATIVE_REGULATION_OF_MULTICELLULAR_ORGANISMAL_PROCESS		64	-0.0784347	-0.723282	0.84263	0.999275	1	611	tags=59%, list=52%, signal=117%
GO_AMINOGLYCAN_METABOLIC_PROCESS	GO_AMINOGLYCAN_METABOLIC_PROCESS		16	-0.151123	-0.721666	0.788423	0.997481	1	413	tags=50%, list=35%, signal=76%
GO_SINGLE_ORGANISM_CELL_ADHESION	GO_SINGLE_ORGANISM_CELL_ADHESION		31	-0.108656	-0.71279	0.82846	1	1	407	tags=45%, list=35%, signal=67%
GO_CELLULAR_RESPONSE_TO_ENDOGENOUS_STIMULUS	GO_CELLULAR_RESPONSE_TO_ENDOGENOUS_STIMULUS		86	-0.0666681	-0.699824	0.832298	1	1	338	tags=35%, list=29%, signal=45%
GO_PROTEIN_MATURATION	GO_PROTEIN_MATURATION		19	-0.135247	-0.699061	0.85	1	1	957	tags=95%, list=82%, signal=504%
GO_NEGATIVE_REGULATION_OF_TRANSPORT	GO_NEGATIVE_REGULATION_OF_TRANSPORT		34	-0.103509	-0.696831	0.860279	1	1	470	tags=50%, list=40%, signal=81%
GO_REGULATION_OF_DEFENSE_RESPONSE	GO_REGULATION_OF_DEFENSE_RESPONSE		58	-0.0795019	-0.693607	0.867063	1	1	560	tags=55%, list=48%, signal=100%
GO_REGULATION_OF_TRANSPORT	GO_REGULATION_OF_TRANSPORT		118	-0.0552132	-0.688777	0.841667	1	1	470	tags=45%, list=40%, signal=67%
GO_POSITIVE_REGULATION_OF_CELL_DEVELOPMENT	GO_POSITIVE_REGULATION_OF_CELL_DEVELOPMENT		36	-0.0984183	-0.686966	0.853465	1	1	476	tags=50%, list=41%, signal=82%
GO_SYSTEM_PROCESS	GO_SYSTEM_PROCESS		96	-0.0639108	-0.683394	0.862903	1	1	140	tags=18%, list=12%, signal=18%
GO_CELLULAR_RESPONSE_TO_HORMONE_STIMULUS	GO_CELLULAR_RESPONSE_TO_HORMONE_STIMULUS		48	-0.0834443	-0.676266	0.895372	1	1	812	tags=77%, list=69%, signal=240%
GO_REGULATION_OF_CYTOPLASMIC_TRANSPORT	GO_REGULATION_OF_CYTOPLASMIC_TRANSPORT		31	-0.101826	-0.674975	0.875	1	1	945	tags=90%, list=80%, signal=451%
GO_CARBOHYDRATE_METABOLIC_PROCESS	GO_CARBOHYDRATE_METABOLIC_PROCESS		56	-0.0783925	-0.673889	0.857988	1	1	710	tags=68%, list=60%, signal=164%
GO_RESPONSE_TO_KETONE	GO_RESPONSE_TO_KETONE		16	-0.14076	-0.673371	0.867816	1	1	425	tags=50%, list=36%, signal=77%
GO_SECOND_MESSENGER_MEDIATED_SIGNALING	GO_SECOND_MESSENGER_MEDIATED_SIGNALING		17	-0.138136	-0.672469	0.870707	1	1	808	tags=82%, list=69%, signal=260%
GO_POSITIVE_REGULATION_OF_CYTOPLASMIC_TRANSPORT	GO_POSITIVE_REGULATION_OF_CYTOPLASMIC_TRANSPORT		17	-0.139102	-0.672147	0.857438	1	1	945	tags=94%, list=80%, signal=476%
GO_POSITIVE_REGULATION_OF_HYDROLASE_ACTIVITY	GO_POSITIVE_REGULATION_OF_HYDROLASE_ACTIVITY		48	-0.0830743	-0.664188	0.89022	1	1	470	tags=48%, list=40%, signal=77%
GO_NEGATIVE_REGULATION_OF_CELL_ADHESION	GO_NEGATIVE_REGULATION_OF_CELL_ADHESION		18	-0.130527	-0.663429	0.89391	1	1	111	tags=22%, list=9%, signal=24%
GO_REGULATION_OF_NUCLEOCYTOPLASMIC_TRANSPORT	GO_REGULATION_OF_NUCLEOCYTOPLASMIC_TRANSPORT		15	-0.146793	-0.660845	0.884462	1	1	457	tags=53%, list=39%, signal=86%
GO_DEPHOSPHORYLATION	GO_DEPHOSPHORYLATION		25	-0.11262	-0.660445	0.887776	1	1	576	tags=60%, list=49%, signal=115%
GO_NEGATIVE_REGULATION_OF_BINDING	GO_NEGATIVE_REGULATION_OF_BINDING		16	-0.136982	-0.654609	0.90856	1	1	943	tags=94%, list=80%, signal=470%
GO_REGULATION_OF_ION_HOMEOSTASIS	GO_REGULATION_OF_ION_HOMEOSTASIS		18	-0.128508	-0.654103	0.911877	1	1	309	tags=39%, list=26%, signal=52%
GO_REGULATION_OF_BLOOD_PRESSURE	GO_REGULATION_OF_BLOOD_PRESSURE		17	-0.131883	-0.651928	0.9182	1	1	539	tags=59%, list=46%, signal=107%
GO_POSITIVE_REGULATION_OF_DEFENSE_RESPONSE	GO_POSITIVE_REGULATION_OF_DEFENSE_RESPONSE		22	-0.11774	-0.651001	0.879592	1	1	986	tags=95%, list=84%, signal=585%
GO_NEGATIVE_REGULATION_OF_MOLECULAR_FUNCTION	GO_NEGATIVE_REGULATION_OF_MOLECULAR_FUNCTION		94	-0.0579393	-0.644684	0.912955	1	1	438	tags=43%, list=37%, signal=62%
GO_REGULATION_OF_BLOOD_CIRCULATION	GO_REGULATION_OF_BLOOD_CIRCULATION		22	-0.114504	-0.642794	0.906667	1	1	883	tags=86%, list=75%, signal=342%
GO_POSITIVE_REGULATION_OF_TRANSPORT	GO_POSITIVE_REGULATION_OF_TRANSPORT		72	-0.0673775	-0.642046	0.896282	0.998509	1	954	tags=88%, list=81%, signal=438%
GO_POSITIVE_REGULATION_OF_IMMUNE_SYSTEM_PROCESS	GO_POSITIVE_REGULATION_OF_IMMUNE_SYSTEM_PROCESS		63	-0.0682782	-0.636478	0.912698	1	1	596	tags=57%, list=51%, signal=110%
GO_REGULATION_OF_VASCULATURE_DEVELOPMENT	GO_REGULATION_OF_VASCULATURE_DEVELOPMENT		28	-0.102904	-0.636396	0.904471	0.996455	1	512	tags=54%, list=44%, signal=93%
GO_POSITIVE_REGULATION_OF_CELL_DIFFERENTIATION	GO_POSITIVE_REGULATION_OF_CELL_DIFFERENTIATION		62	-0.070376	-0.634584	0.930636	0.994338	1	434	tags=44%, list=37%, signal=65%
GO_EXTRACELLULAR_STRUCTURE_ORGANIZATION	GO_EXTRACELLULAR_STRUCTURE_ORGANIZATION		24	-0.105507	-0.627098	0.915289	0.997616	1	271	tags=33%, list=23%, signal=42%
GO_NEGATIVE_REGULATION_OF_NERVOUS_SYSTEM_DEVELOPMENT	GO_NEGATIVE_REGULATION_OF_NERVOUS_SYSTEM_DEVELOPMENT		16	-0.131045	-0.624802	0.921371	0.995846	1	583	tags=63%, list=50%, signal=122%
GO_NEGATIVE_REGULATION_OF_INTRACELLULAR_SIGNAL_TRANSDUCTION	GO_NEGATIVE_REGULATION_OF_INTRACELLULAR_SIGNAL_TRANSDUCTION		38	-0.0862213	-0.622941	0.919075	0.993815	1	212	tags=26%, list=18%, signal=31%
GO_REGULATION_OF_CELL_CELL_ADHESION	GO_REGULATION_OF_CELL_CELL_ADHESION		24	-0.107609	-0.620617	0.927734	0.992093	1	611	tags=63%, list=52%, signal=128%
GO_NEURON_PROJECTION_MORPHOGENESIS	GO_NEURON_PROJECTION_MORPHOGENESIS		27	-0.0988408	-0.61627	0.959227	0.99214	1	192	tags=26%, list=16%, signal=30%
GO_REGULATION_OF_HORMONE_LEVELS	GO_REGULATION_OF_HORMONE_LEVELS		45	-0.0779647	-0.610065	0.941973	0.993411	1	800	tags=76%, list=68%, signal=228%
GO_RESPONSE_TO_OXIDATIVE_STRESS	GO_RESPONSE_TO_OXIDATIVE_STRESS		39	-0.0835197	-0.609765	0.936255	0.989881	1	1020	tags=95%, list=87%, signal=699%
GO_REGULATION_OF_MEMBRANE_POTENTIAL	GO_REGULATION_OF_MEMBRANE_POTENTIAL		27	-0.097646	-0.609546	0.933586	0.986344	1	1063	tags=100%, list=91%, signal=1033%
GO_NEGATIVE_REGULATION_OF_CELL_PROLIFERATION	GO_NEGATIVE_REGULATION_OF_CELL_PROLIFERATION		45	-0.0761539	-0.606205	0.930586	0.985356	1	202	tags=24%, list=17%, signal=28%
GO_POSITIVE_REGULATION_OF_NEURON_DIFFERENTIATION	GO_POSITIVE_REGULATION_OF_NEURON_DIFFERENTIATION		22	-0.106771	-0.598153	0.933194	0.987829	1	465	tags=50%, list=40%, signal=81%
GO_SMALL_MOLECULE_CATABOLIC_PROCESS	GO_SMALL_MOLECULE_CATABOLIC_PROCESS		38	-0.0820515	-0.592687	0.94375	0.988224	1	1020	tags=95%, list=87%, signal=699%
GO_CELL_MORPHOGENESIS_INVOLVED_IN_NEURON_DIFFERENTIATION	GO_CELL_MORPHOGENESIS_INVOLVED_IN_NEURON_DIFFERENTIATION		27	-0.0988408	-0.590973	0.920078	0.985837	1	192	tags=26%, list=16%, signal=30%
GO_PROTEOLYSIS	GO_PROTEOLYSIS		65	-0.0614414	-0.581569	0.960825	0.988705	1	854	tags=78%, list=73%, signal=272%
GO_REGULATION_OF_CHEMOTAXIS	GO_REGULATION_OF_CHEMOTAXIS		20	-0.106586	-0.575604	0.962672	0.988803	1	465	tags=50%, list=40%, signal=81%
GO_POSITIVE_REGULATION_OF_VASCULATURE_DEVELOPMENT	GO_POSITIVE_REGULATION_OF_VASCULATURE_DEVELOPMENT		16	-0.119819	-0.56974	0.942748	0.988736	1	596	tags=63%, list=51%, signal=125%
GO_REGULATION_OF_ENDOCYTOSIS	GO_REGULATION_OF_ENDOCYTOSIS		17	-0.106411	-0.538839	0.975952	1	1	16	tags=12%, list=1%, signal=12%
GO_REGULATION_OF_PEPTIDYL_TYROSINE_PHOSPHORYLATION	GO_REGULATION_OF_PEPTIDYL_TYROSINE_PHOSPHORYLATION		18	-0.106401	-0.538664	0.96578	0.997049	1	465	tags=50%, list=40%, signal=82%
GO_CELL_PROJECTION_ORGANIZATION	GO_CELL_PROJECTION_ORGANIZATION		47	-0.0636222	-0.50888	0.991886	1	1	279	tags=30%, list=24%, signal=38%
GO_CARBOHYDRATE_DERIVATIVE_CATABOLIC_PROCESS	GO_CARBOHYDRATE_DERIVATIVE_CATABOLIC_PROCESS		16	-0.102979	-0.490774	0.989733	1	1	909	tags=88%, list=77%, signal=382%
GO_TAXIS	GO_TAXIS		30	-0.0748834	-0.482453	0.982456	1	1	111	tags=17%, list=9%, signal=18%
GO_POSITIVE_REGULATION_OF_NEURON_PROJECTION_DEVELOPMENT	GO_POSITIVE_REGULATION_OF_NEURON_PROJECTION_DEVELOPMENT		19	-0.0920483	-0.478988	0.995885	1	1	389	tags=42%, list=33%, signal=62%
GO_RESPONSE_TO_TRANSITION_METAL_NANOPARTICLE	GO_RESPONSE_TO_TRANSITION_METAL_NANOPARTICLE		16	-0.099525	-0.478738	0.992322	0.996574	1	326	tags=38%, list=28%, signal=51%
GO_PROTEIN_HOMOOLIGOMERIZATION	GO_PROTEIN_HOMOOLIGOMERIZATION		18	-0.0927528	-0.470736	0.993976	0.994432	1	546	tags=56%, list=47%, signal=102%

## Sheet: WT vs DKO liver down cp
NAME	GS<br> follow link to MSigDB	GS DETAILS	SIZE	ES	NES	NOM p-val	FDR q-val	FWER p-val	RANK AT MAX	LEADING EDGE
REACTOME_METABOLISM_OF_AMINO_ACIDS_AND_DERIVATIVES	REACTOME_METABOLISM_OF_AMINO_ACIDS_AND_DERIVATIVES	Details ...	34	-0.334613	-2.29803	0	0.0269495	0.056	746	tags=65%, list=32%, signal=93%
REACTOME_TRANSCRIPTION	REACTOME_TRANSCRIPTION	Details ...	15	-0.442092	-2.05221	0	0.0616581	0.222	848	tags=80%, list=36%, signal=124%
KEGG_TIGHT_JUNCTION	KEGG_TIGHT_JUNCTION	Details ...	15	-0.32939	-1.54602	0.0568807	0.631437	0.985	1424	tags=93%, list=61%, signal=236%
REACTOME_METABOLISM_OF_CARBOHYDRATES	REACTOME_METABOLISM_OF_CARBOHYDRATES	Details ...	47	-0.190065	-1.5188	0.0695825	0.531223	0.993	1512	tags=83%, list=64%, signal=228%
REACTOME_FATTY_ACID_TRIACYLGLYCEROL_AND_KETONE_BODY_METABOLISM	REACTOME_FATTY_ACID_TRIACYLGLYCEROL_AND_KETONE_BODY_METABOLISM	Details ...	30	-0.220075	-1.45286	0.0764706	0.566218	0.999	1291	tags=77%, list=55%, signal=168%
REACTOME_METABOLISM_OF_LIPIDS_AND_LIPOPROTEINS	REACTOME_METABOLISM_OF_LIPIDS_AND_LIPOPROTEINS	Details ...	83	-0.137275	-1.44032	0.0875	0.498888	0.999	1444	tags=75%, list=61%, signal=187%
REACTOME_METABOLISM_OF_PROTEINS	REACTOME_METABOLISM_OF_PROTEINS	Details ...	34	-0.20062	-1.3909	0.104628	0.526504	1	987	tags=62%, list=42%, signal=105%
KEGG_COMPLEMENT_AND_COAGULATION_CASCADES	KEGG_COMPLEMENT_AND_COAGULATION_CASCADES	Details ...	23	-0.239626	-1.34712	0.117769	0.551843	1	771	tags=57%, list=33%, signal=83%
REACTOME_INTEGRATION_OF_ENERGY_METABOLISM	REACTOME_INTEGRATION_OF_ENERGY_METABOLISM	Details ...	20	-0.239347	-1.27994	0.177043	0.636328	1	1557	tags=90%, list=66%, signal=265%
REACTOME_AMINO_ACID_AND_OLIGOPEPTIDE_SLC_TRANSPORTERS	REACTOME_AMINO_ACID_AND_OLIGOPEPTIDE_SLC_TRANSPORTERS	Details ...	16	-0.269726	-1.27039	0.176	0.594192	1	1720	tags=100%, list=73%, signal=371%
REACTOME_TRIF_MEDIATED_TLR3_SIGNALING	REACTOME_TRIF_MEDIATED_TLR3_SIGNALING	Details ...	19	-0.243136	-1.26817	0.181263	0.545013	1	1412	tags=84%, list=60%, signal=210%
REACTOME_BIOLOGICAL_OXIDATIONS	REACTOME_BIOLOGICAL_OXIDATIONS	Details ...	25	-0.203685	-1.1934	0.228846	0.654493	1	1688	tags=92%, list=72%, signal=324%
REACTOME_TRANSPORT_OF_INORGANIC_CATIONS_ANIONS_AND_AMINO_ACIDS_OLIGOPEPTIDES	REACTOME_TRANSPORT_OF_INORGANIC_CATIONS_ANIONS_AND_AMINO_ACIDS_OLIGOPEPTIDES	Details ...	20	-0.219759	-1.16033	0.275093	0.675822	1	1720	tags=95%, list=73%, signal=352%
KEGG_RENAL_CELL_CARCINOMA	KEGG_RENAL_CELL_CARCINOMA	Details ...	17	-0.232468	-1.1324	0.308316	0.688085	1	1669	tags=94%, list=71%, signal=323%
REACTOME_APOPTOSIS	REACTOME_APOPTOSIS	Details ...	17	-0.223686	-1.10282	0.33195	0.705276	1	1137	tags=71%, list=48%, signal=136%
REACTOME_SLC_MEDIATED_TRANSMEMBRANE_TRANSPORT	REACTOME_SLC_MEDIATED_TRANSMEMBRANE_TRANSPORT	Details ...	50	-0.13067	-1.09636	0.348337	0.675641	1	1720	tags=86%, list=73%, signal=315%
KEGG_INSULIN_SIGNALING_PATHWAY	KEGG_INSULIN_SIGNALING_PATHWAY	Details ...	30	-0.157521	-1.03036	0.382937	0.780537	1	1436	tags=77%, list=61%, signal=195%
REACTOME_TRAF6_MEDIATED_INDUCTION_OF_NFKB_AND_MAP_KINASES_UPON_TLR7_8_OR_9_ACTIVATION	REACTOME_TRAF6_MEDIATED_INDUCTION_OF_NFKB_AND_MAP_KINASES_UPON_TLR7_8_OR_9_ACTIVATION	Details ...	17	-0.199662	-1.00175	0.415094	0.80199	1	1193	tags=71%, list=51%, signal=142%
REACTOME_NEURONAL_SYSTEM	REACTOME_NEURONAL_SYSTEM	Details ...	28	-0.158805	-0.988689	0.447853	0.788939	1	1729	tags=89%, list=74%, signal=335%
KEGG_PURINE_METABOLISM	KEGG_PURINE_METABOLISM	Details ...	26	-0.152786	-0.914977	0.555992	0.909281	1	1633	tags=85%, list=70%, signal=275%
REACTOME_CELL_CELL_COMMUNICATION	REACTOME_CELL_CELL_COMMUNICATION		19	-0.170866	-0.902621	0.571717	0.892538	1	1086	tags=63%, list=46%, signal=117%
REACTOME_TRANSMISSION_ACROSS_CHEMICAL_SYNAPSES	REACTOME_TRANSMISSION_ACROSS_CHEMICAL_SYNAPSES		18	-0.174726	-0.87473	0.617284	0.909509	1	1681	tags=89%, list=72%, signal=311%
REACTOME_MYD88_MAL_CASCADE_INITIATED_ON_PLASMA_MEMBRANE	REACTOME_MYD88_MAL_CASCADE_INITIATED_ON_PLASMA_MEMBRANE		21	-0.160435	-0.872291	0.592213	0.875281	1	1193	tags=67%, list=51%, signal=134%
REACTOME_GLYCEROPHOSPHOLIPID_BIOSYNTHESIS	REACTOME_GLYCEROPHOSPHOLIPID_BIOSYNTHESIS		17	-0.170061	-0.837865	0.676289	0.906924	1	1262	tags=71%, list=54%, signal=152%
REACTOME_NFKB_AND_MAP_KINASES_ACTIVATION_MEDIATED_BY_TLR4_SIGNALING_REPERTOIRE	REACTOME_NFKB_AND_MAP_KINASES_ACTIVATION_MEDIATED_BY_TLR4_SIGNALING_REPERTOIRE		18	-0.160229	-0.825896	0.697286	0.892471	1	1193	tags=67%, list=51%, signal=134%
REACTOME_HIV_INFECTION	REACTOME_HIV_INFECTION		16	-0.168525	-0.82487	0.682171	0.85983	1	1956	tags=100%, list=83%, signal=595%
REACTOME_ACTIVATED_TLR4_SIGNALLING	REACTOME_ACTIVATED_TLR4_SIGNALLING		25	-0.133758	-0.8073	0.703633	0.857889	1	1193	tags=64%, list=51%, signal=129%
REACTOME_CYTOKINE_SIGNALING_IN_IMMUNE_SYSTEM	REACTOME_CYTOKINE_SIGNALING_IN_IMMUNE_SYSTEM		48	-0.0998188	-0.798528	0.697095	0.841628	1	1777	tags=85%, list=76%, signal=344%
REACTOME_POST_TRANSLATIONAL_PROTEIN_MODIFICATION	REACTOME_POST_TRANSLATIONAL_PROTEIN_MODIFICATION		21	-0.137066	-0.760003	0.742574	0.874438	1	1471	tags=76%, list=63%, signal=202%
KEGG_GLUTATHIONE_METABOLISM	KEGG_GLUTATHIONE_METABOLISM		19	-0.141918	-0.750049	0.792079	0.860246	1	1277	tags=68%, list=54%, signal=149%
REACTOME_INTERFERON_SIGNALING	REACTOME_INTERFERON_SIGNALING		23	-0.126657	-0.747539	0.789264	0.836293	1	1442	tags=74%, list=61%, signal=190%
ST_INTEGRIN_SIGNALING_PATHWAY	ST_INTEGRIN_SIGNALING_PATHWAY		15	-0.151736	-0.705823	0.820202	0.864677	1	1995	tags=100%, list=85%, signal=661%
KEGG_NOD_LIKE_RECEPTOR_SIGNALING_PATHWAY	KEGG_NOD_LIKE_RECEPTOR_SIGNALING_PATHWAY		16	-0.114172	-0.551902	0.961014	0.970703	1	762	tags=44%, list=32%, signal=64%

## Sheet: WT vs DKO liver up cp
NAME	GS<br> follow link to MSigDB	GS DETAILS	SIZE	ES	NES	NOM p-val	FDR q-val	FWER p-val	RANK AT MAX	LEADING EDGE
NABA_MATRISOME	NABA_MATRISOME	Details ...	183	0.242931	3.69092	0	0	0	1295	tags=78%, list=55%, signal=160%
REACTOME_CLASS_A1_RHODOPSIN_LIKE_RECEPTORS	REACTOME_CLASS_A1_RHODOPSIN_LIKE_RECEPTORS	Details ...	34	0.417688	2.8973	0	0	0	828	tags=76%, list=35%, signal=116%
REACTOME_CELL_CYCLE	REACTOME_CELL_CYCLE	Details ...	45	0.352632	2.79573	0	0	0	1274	tags=89%, list=54%, signal=191%
NABA_MATRISOME_ASSOCIATED	NABA_MATRISOME_ASSOCIATED	Details ...	120	0.214991	2.70211	0	0	0	694	tags=50%, list=30%, signal=67%
NABA_CORE_MATRISOME	NABA_CORE_MATRISOME	Details ...	63	0.297287	2.65832	0	0	0	1295	tags=84%, list=55%, signal=183%
REACTOME_CELL_CYCLE_MITOTIC	REACTOME_CELL_CYCLE_MITOTIC	Details ...	39	0.360407	2.65521	0	0	0	1274	tags=90%, list=54%, signal=193%
KEGG_FC_GAMMA_R_MEDIATED_PHAGOCYTOSIS	KEGG_FC_GAMMA_R_MEDIATED_PHAGOCYTOSIS	Details ...	26	0.410853	2.50837	0	0.00140118	0.007	1393	tags=100%, list=59%, signal=243%
KEGG_CHEMOKINE_SIGNALING_PATHWAY	KEGG_CHEMOKINE_SIGNALING_PATHWAY	Details ...	38	0.348098	2.50709	0	0.00122604	0.007	925	tags=74%, list=39%, signal=120%
REACTOME_DNA_REPLICATION	REACTOME_DNA_REPLICATION	Details ...	29	0.392871	2.49604	0	0.00124787	0.008	1274	tags=93%, list=54%, signal=201%
REACTOME_GPCR_LIGAND_BINDING	REACTOME_GPCR_LIGAND_BINDING	Details ...	40	0.338865	2.48267	0.00199203	0.00126336	0.009	567	tags=58%, list=24%, signal=75%
REACTOME_MITOTIC_PROMETAPHASE	REACTOME_MITOTIC_PROMETAPHASE	Details ...	15	0.533591	2.4773	0	0.00114851	0.009	476	tags=73%, list=20%, signal=91%
REACTOME_MITOTIC_M_M_G1_PHASES	REACTOME_MITOTIC_M_M_G1_PHASES	Details ...	27	0.387365	2.40041	0	0.00222955	0.018	1274	tags=93%, list=54%, signal=200%
REACTOME_PEPTIDE_LIGAND_BINDING_RECEPTORS	REACTOME_PEPTIDE_LIGAND_BINDING_RECEPTORS	Details ...	21	0.428592	2.37826	0	0.00285544	0.025	567	tags=67%, list=24%, signal=87%
REACTOME_ADAPTIVE_IMMUNE_SYSTEM	REACTOME_ADAPTIVE_IMMUNE_SYSTEM	Details ...	68	0.237384	2.31134	0	0.0043746	0.041	1495	tags=87%, list=64%, signal=232%
REACTOME_SIGNALING_BY_GPCR	REACTOME_SIGNALING_BY_GPCR	Details ...	76	0.220047	2.27238	0	0.00555282	0.055	982	tags=63%, list=42%, signal=105%
REACTOME_HEMOSTASIS	REACTOME_HEMOSTASIS	Details ...	83	0.212782	2.21525	0.00199203	0.00973473	0.099	1469	tags=83%, list=63%, signal=214%
REACTOME_AXON_GUIDANCE	REACTOME_AXON_GUIDANCE	Details ...	44	0.281763	2.17189	0.00203666	0.0118162	0.126	1431	tags=89%, list=61%, signal=223%
NABA_ECM_GLYCOPROTEINS	NABA_ECM_GLYCOPROTEINS	Details ...	41	0.292207	2.16802	0.01	0.0114905	0.129	1272	tags=83%, list=54%, signal=178%
KEGG_CYTOKINE_CYTOKINE_RECEPTOR_INTERACTION	KEGG_CYTOKINE_CYTOKINE_RECEPTOR_INTERACTION	Details ...	52	0.253417	2.14932	0	0.0117461	0.138	1133	tags=73%, list=48%, signal=138%
REACTOME_GPCR_DOWNSTREAM_SIGNALING	REACTOME_GPCR_DOWNSTREAM_SIGNALING	Details ...	64	0.235278	2.11892	0.00197628	0.0131401	0.163	1296	tags=78%, list=55%, signal=170%
KEGG_CELL_CYCLE	KEGG_CELL_CYCLE		19	0.407652	2.06853	0.00561798	0.0166422	0.215	1274	tags=95%, list=54%, signal=205%
REACTOME_SIGNALING_BY_PDGF	REACTOME_SIGNALING_BY_PDGF		27	0.335663	2.06416	0.00403226	0.0162459	0.219	1394	tags=93%, list=59%, signal=225%
PID_INTEGRIN1_PATHWAY	PID_INTEGRIN1_PATHWAY		28	0.335714	2.04615	0.00394477	0.0172939	0.24	1065	tags=79%, list=45%, signal=142%
PID_SYNDECAN_1_PATHWAY	PID_SYNDECAN_1_PATHWAY		18	0.398093	2.03707	0.00393701	0.0176346	0.253	1289	tags=94%, list=55%, signal=208%
REACTOME_G_ALPHA_I_SIGNALLING_EVENTS	REACTOME_G_ALPHA_I_SIGNALLING_EVENTS		23	0.340421	1.99449	0.00804829	0.0214788	0.313	943	tags=74%, list=40%, signal=122%
REACTOME_IMMUNE_SYSTEM	REACTOME_IMMUNE_SYSTEM		155	0.139835	1.98486	0.0020284	0.0221785	0.329	1495	tags=77%, list=64%, signal=197%
KEGG_ECM_RECEPTOR_INTERACTION	KEGG_ECM_RECEPTOR_INTERACTION		27	0.318429	1.97167	0.00195312	0.0232137	0.355	1434	tags=93%, list=61%, signal=235%
NABA_SECRETED_FACTORS	NABA_SECRETED_FACTORS		43	0.247682	1.95108	0.00212314	0.0253757	0.389	684	tags=53%, list=29%, signal=74%
KEGG_FOCAL_ADHESION	KEGG_FOCAL_ADHESION		47	0.243446	1.94647	0.0125523	0.0252177	0.397	1587	tags=91%, list=68%, signal=277%
KEGG_HEMATOPOIETIC_CELL_LINEAGE	KEGG_HEMATOPOIETIC_CELL_LINEAGE		20	0.353694	1.86663	0.00400802	0.0389978	0.551	1054	tags=80%, list=45%, signal=144%
KEGG_NATURAL_KILLER_CELL_MEDIATED_CYTOTOXICITY	KEGG_NATURAL_KILLER_CELL_MEDIATED_CYTOTOXICITY		22	0.341202	1.86377	0.0163265	0.0386239	0.559	913	tags=73%, list=39%, signal=118%
NABA_ECM_AFFILIATED	NABA_ECM_AFFILIATED		32	0.277958	1.86047	0.00795229	0.0383595	0.565	676	tags=56%, list=29%, signal=78%
KEGG_LEUKOCYTE_TRANSENDOTHELIAL_MIGRATION	KEGG_LEUKOCYTE_TRANSENDOTHELIAL_MIGRATION		35	0.261886	1.82793	0.0181087	0.0438231	0.627	1540	tags=91%, list=66%, signal=262%
REACTOME_INTEGRIN_CELL_SURFACE_INTERACTIONS	REACTOME_INTEGRIN_CELL_SURFACE_INTERACTIONS		25	0.306965	1.81738	0.0161943	0.0444784	0.643	1540	tags=96%, list=66%, signal=276%
KEGG_ERBB_SIGNALING_PATHWAY	KEGG_ERBB_SIGNALING_PATHWAY		16	0.363315	1.79089	0.0204082	0.0506032	0.702	1353	tags=94%, list=58%, signal=220%
REACTOME_PLATELET_ACTIVATION_SIGNALING_AND_AGGREGATION	REACTOME_PLATELET_ACTIVATION_SIGNALING_AND_AGGREGATION		43	0.23166	1.79083	0.0160643	0.0491976	0.702	1540	tags=88%, list=66%, signal=252%
PID_AURORA_B_PATHWAY	PID_AURORA_B_PATHWAY		16	0.372427	1.78916	0.0204499	0.0483198	0.705	598	tags=63%, list=25%, signal=83%
KEGG_REGULATION_OF_ACTIN_CYTOSKELETON	KEGG_REGULATION_OF_ACTIN_CYTOSKELETON		42	0.238137	1.78506	0.0118812	0.0480887	0.714	1127	tags=71%, list=48%, signal=135%
PID_CXCR4_PATHWAY	PID_CXCR4_PATHWAY		23	0.309416	1.76931	0.0190476	0.0508638	0.74	913	tags=70%, list=39%, signal=113%
REACTOME_CELL_SURFACE_INTERACTIONS_AT_THE_VASCULAR_WALL	REACTOME_CELL_SURFACE_INTERACTIONS_AT_THE_VASCULAR_WALL		19	0.332083	1.73047	0.0290135	0.0598439	0.817	1450	tags=95%, list=62%, signal=246%
KEGG_FC_EPSILON_RI_SIGNALING_PATHWAY	KEGG_FC_EPSILON_RI_SIGNALING_PATHWAY		19	0.334343	1.72666	0.0313725	0.0593771	0.823	1074	tags=79%, list=46%, signal=144%
KEGG_GLIOMA	KEGG_GLIOMA		16	0.345733	1.68052	0.0303644	0.0719328	0.88	1394	tags=94%, list=59%, signal=229%
KEGG_CELL_ADHESION_MOLECULES_CAMS	KEGG_CELL_ADHESION_MOLECULES_CAMS		30	0.25105	1.63688	0.0393701	0.0878875	0.931	1452	tags=87%, list=62%, signal=224%
REACTOME_DEVELOPMENTAL_BIOLOGY	REACTOME_DEVELOPMENTAL_BIOLOGY		62	0.175006	1.61	0.0349794	0.0983031	0.953	1341	tags=74%, list=57%, signal=168%
KEGG_T_CELL_RECEPTOR_SIGNALING_PATHWAY	KEGG_T_CELL_RECEPTOR_SIGNALING_PATHWAY		17	0.325561	1.60413	0.0444874	0.0994797	0.957	1450	tags=94%, list=62%, signal=244%
KEGG_DILATED_CARDIOMYOPATHY	KEGG_DILATED_CARDIOMYOPATHY		16	0.328581	1.58584	0.0565657	0.106688	0.969	1434	tags=94%, list=61%, signal=239%
REACTOME_COLLAGEN_FORMATION	REACTOME_COLLAGEN_FORMATION		19	0.295089	1.58261	0.0483559	0.105439	0.971	1289	tags=84%, list=55%, signal=185%
KEGG_B_CELL_RECEPTOR_SIGNALING_PATHWAY	KEGG_B_CELL_RECEPTOR_SIGNALING_PATHWAY		17	0.315694	1.57853	0.0615079	0.105311	0.971	1473	tags=94%, list=63%, signal=251%
PID_RAC1_PATHWAY	PID_RAC1_PATHWAY		16	0.3244	1.5618	0.0549898	0.110903	0.98	710	tags=63%, list=30%, signal=89%
KEGG_NEUROTROPHIN_SIGNALING_PATHWAY	KEGG_NEUROTROPHIN_SIGNALING_PATHWAY		21	0.286799	1.55874	0.0517928	0.110074	0.982	1456	tags=90%, list=62%, signal=236%
NABA_COLLAGENS	NABA_COLLAGENS		16	0.32783	1.54317	0.0470348	0.116382	0.986	1289	tags=88%, list=55%, signal=193%
KEGG_LYSOSOME	KEGG_LYSOSOME		18	0.299809	1.5208	0.0631579	0.125736	0.989	1518	tags=94%, list=65%, signal=265%
KEGG_GAP_JUNCTION	KEGG_GAP_JUNCTION		18	0.297043	1.51554	0.0726915	0.126146	0.99	1394	tags=89%, list=59%, signal=217%
PID_IL4_2PATHWAY	PID_IL4_2PATHWAY		15	0.314531	1.50024	0.0507099	0.131976	0.995	674	tags=60%, list=29%, signal=84%
NABA_ECM_REGULATORS	NABA_ECM_REGULATORS		45	0.186887	1.49525	0.0923695	0.132793	0.996	1447	tags=80%, list=62%, signal=204%
PID_AVB3_INTEGRIN_PATHWAY	PID_AVB3_INTEGRIN_PATHWAY		20	0.280412	1.48651	0.0692308	0.135543	0.997	1342	tags=85%, list=57%, signal=197%
REACTOME_SIGNALING_BY_RHO_GTPASES	REACTOME_SIGNALING_BY_RHO_GTPASES		28	0.236145	1.48476	0.0794574	0.134052	0.997	1296	tags=79%, list=55%, signal=173%
KEGG_LEISHMANIA_INFECTION	KEGG_LEISHMANIA_INFECTION		15	0.317388	1.48374	0.077381	0.132506	0.997	1450	tags=93%, list=62%, signal=242%
PID_P73PATHWAY	PID_P73PATHWAY		15	0.317274	1.48199	0.0744467	0.131318	0.997	198	tags=40%, list=8%, signal=43%
REACTOME_PHOSPHOLIPID_METABOLISM	REACTOME_PHOSPHOLIPID_METABOLISM		35	0.213353	1.48049	0.0836576	0.130042	0.997	1451	tags=83%, list=62%, signal=214%
REACTOME_RESPONSE_TO_ELEVATED_PLATELET_CYTOSOLIC_CA2_	REACTOME_RESPONSE_TO_ELEVATED_PLATELET_CYTOSOLIC_CA2_		21	0.26789	1.47921	0.0821643	0.128584	0.997	1500	tags=90%, list=64%, signal=248%
REACTOME_G1_S_TRANSITION	REACTOME_G1_S_TRANSITION		15	0.325732	1.47777	0.0815109	0.127181	0.998	1274	tags=87%, list=54%, signal=188%
PID_INTEGRIN3_PATHWAY	PID_INTEGRIN3_PATHWAY		17	0.292376	1.4604	0.090535	0.135467	0.998	1113	tags=76%, list=47%, signal=144%
PID_TCR_PATHWAY	PID_TCR_PATHWAY		20	0.276289	1.45467	0.0816733	0.136783	0.999	1469	tags=90%, list=63%, signal=238%
PID_PDGFRB_PATHWAY	PID_PDGFRB_PATHWAY		22	0.255179	1.40217	0.115619	0.167768	1	1540	tags=91%, list=66%, signal=262%
REACTOME_EXTRACELLULAR_MATRIX_ORGANIZATION	REACTOME_EXTRACELLULAR_MATRIX_ORGANIZATION		24	0.244765	1.39176	0.104723	0.172215	1	1289	tags=79%, list=55%, signal=174%
PID_AMB2_NEUTROPHILS_PATHWAY	PID_AMB2_NEUTROPHILS_PATHWAY		16	0.283984	1.37991	0.121145	0.178039	1	1538	tags=94%, list=66%, signal=270%
PID_FCER1_PATHWAY	PID_FCER1_PATHWAY		19	0.265214	1.37875	0.111111	0.176427	1	1235	tags=79%, list=53%, signal=165%
KEGG_NEUROACTIVE_LIGAND_RECEPTOR_INTERACTION	KEGG_NEUROACTIVE_LIGAND_RECEPTOR_INTERACTION		26	0.226363	1.34115	0.136546	0.201351	1	828	tags=58%, list=35%, signal=88%
REACTOME_SIGNALLING_BY_NGF	REACTOME_SIGNALLING_BY_NGF		29	0.2019	1.32362	0.144068	0.21197	1	1393	tags=79%, list=59%, signal=193%
REACTOME_GLYCOSAMINOGLYCAN_METABOLISM	REACTOME_GLYCOSAMINOGLYCAN_METABOLISM		21	0.237113	1.31917	0.146067	0.212515	1	1348	tags=81%, list=57%, signal=188%
REACTOME_MITOTIC_G1_G1_S_PHASES	REACTOME_MITOTIC_G1_G1_S_PHASES		16	0.271334	1.31393	0.171937	0.213796	1	1274	tags=81%, list=54%, signal=176%
REACTOME_G_ALPHA_Q_SIGNALLING_EVENTS	REACTOME_G_ALPHA_Q_SIGNALLING_EVENTS		20	0.233333	1.26893	0.183299	0.251082	1	982	tags=65%, list=42%, signal=111%
KEGG_MAPK_SIGNALING_PATHWAY	KEGG_MAPK_SIGNALING_PATHWAY		54	0.141997	1.23108	0.230916	0.284719	1	1456	tags=76%, list=62%, signal=195%
REACTOME_GASTRIN_CREB_SIGNALLING_PATHWAY_VIA_PKC_AND_MAPK	REACTOME_GASTRIN_CREB_SIGNALLING_PATHWAY_VIA_PKC_AND_MAPK		24	0.208477	1.21692	0.218437	0.294703	1	982	tags=63%, list=42%, signal=106%
REACTOME_TRANSMEMBRANE_TRANSPORT_OF_SMALL_MOLECULES	REACTOME_TRANSMEMBRANE_TRANSPORT_OF_SMALL_MOLECULES		72	0.123902	1.19464	0.218557	0.313932	1	1478	tags=75%, list=63%, signal=196%
KEGG_ARACHIDONIC_ACID_METABOLISM	KEGG_ARACHIDONIC_ACID_METABOLISM		15	0.251293	1.18166	0.258264	0.323198	1	665	tags=53%, list=28%, signal=74%
REACTOME_G_ALPHA1213_SIGNALLING_EVENTS	REACTOME_G_ALPHA1213_SIGNALLING_EVENTS		15	0.249207	1.17533	0.267465	0.325897	1	1296	tags=80%, list=55%, signal=177%
KEGG_JAK_STAT_SIGNALING_PATHWAY	KEGG_JAK_STAT_SIGNALING_PATHWAY		28	0.191379	1.17328	0.248988	0.323537	1	1316	tags=75%, list=56%, signal=169%
REACTOME_NGF_SIGNALLING_VIA_TRKA_FROM_THE_PLASMA_MEMBRANE	REACTOME_NGF_SIGNALLING_VIA_TRKA_FROM_THE_PLASMA_MEMBRANE		17	0.231509	1.16272	0.280083	0.331476	1	1393	tags=82%, list=59%, signal=201%
KEGG_ENDOCYTOSIS	KEGG_ENDOCYTOSIS		24	0.195711	1.13988	0.274468	0.354091	1	1403	tags=79%, list=60%, signal=195%
KEGG_AXON_GUIDANCE	KEGG_AXON_GUIDANCE		25	0.180181	1.07429	0.356108	0.432418	1	1271	tags=72%, list=54%, signal=155%
REACTOME_INTERFERON_GAMMA_SIGNALING	REACTOME_INTERFERON_GAMMA_SIGNALING		18	0.209299	1.06474	0.374494	0.440638	1	1468	tags=83%, list=63%, signal=221%
REACTOME_SIGNALING_BY_THE_B_CELL_RECEPTOR_BCR	REACTOME_SIGNALING_BY_THE_B_CELL_RECEPTOR_BCR		18	0.207153	1.05038	0.364729	0.454537	1	1473	tags=83%, list=63%, signal=222%
KEGG_MELANOMA	KEGG_MELANOMA		15	0.218117	1.02894	0.401174	0.47866	1	1212	tags=73%, list=52%, signal=151%
PID_P53_DOWNSTREAM_PATHWAY	PID_P53_DOWNSTREAM_PATHWAY		30	0.151999	1.00437	0.438492	0.506798	1	1212	tags=67%, list=52%, signal=136%
KEGG_GNRH_SIGNALING_PATHWAY	KEGG_GNRH_SIGNALING_PATHWAY		15	0.20763	0.987777	0.428846	0.52451	1	1393	tags=80%, list=59%, signal=195%
REACTOME_DIABETES_PATHWAYS	REACTOME_DIABETES_PATHWAYS		15	0.210573	0.95903	0.475806	0.562533	1	760	tags=53%, list=32%, signal=78%
KEGG_DRUG_METABOLISM_CYTOCHROME_P450	KEGG_DRUG_METABOLISM_CYTOCHROME_P450		15	0.199914	0.93695	0.504098	0.589389	1	1411	tags=80%, list=60%, signal=199%
KEGG_CALCIUM_SIGNALING_PATHWAY	KEGG_CALCIUM_SIGNALING_PATHWAY		24	0.157487	0.909846	0.565476	0.624742	1	1394	tags=75%, list=59%, signal=183%
REACTOME_SIGNALING_BY_ILS	REACTOME_SIGNALING_BY_ILS		25	0.14972	0.901492	0.562628	0.630424	1	1060	tags=60%, list=45%, signal=108%
KEGG_TOLL_LIKE_RECEPTOR_SIGNALING_PATHWAY	KEGG_TOLL_LIKE_RECEPTOR_SIGNALING_PATHWAY		26	0.145697	0.887387	0.626531	0.645521	1	925	tags=54%, list=39%, signal=88%
REACTOME_SEMAPHORIN_INTERACTIONS	REACTOME_SEMAPHORIN_INTERACTIONS		15	0.191342	0.887228	0.584314	0.638881	1	1431	tags=80%, list=61%, signal=204%
REACTOME_CLASS_I_MHC_MEDIATED_ANTIGEN_PROCESSING_PRESENTATION	REACTOME_CLASS_I_MHC_MEDIATED_ANTIGEN_PROCESSING_PRESENTATION		22	0.157782	0.860734	0.637236	0.67279	1	1980	tags=100%, list=84%, signal=632%
REACTOME_TRANSPORT_OF_GLUCOSE_AND_OTHER_SUGARS_BILE_SALTS_AND_ORGANIC_ACIDS_METAL_IONS_AND_AMINE_COMPOUNDS	REACTOME_TRANSPORT_OF_GLUCOSE_AND_OTHER_SUGARS_BILE_SALTS_AND_ORGANIC_ACIDS_METAL_IONS_AND_AMINE_COMPOUNDS		20	0.158076	0.84439	0.653527	0.689362	1	1392	tags=75%, list=59%, signal=183%
REACTOME_INNATE_IMMUNE_SYSTEM	REACTOME_INNATE_IMMUNE_SYSTEM		61	0.0847341	0.773485	0.74031	0.789108	1	806	tags=43%, list=34%, signal=63%
REACTOME_TOLL_RECEPTOR_CASCADES	REACTOME_TOLL_RECEPTOR_CASCADES		37	0.106752	0.754883	0.794872	0.80656	1	1783	tags=86%, list=76%, signal=354%
KEGG_PATHWAYS_IN_CANCER	KEGG_PATHWAYS_IN_CANCER		55	0.0848194	0.720842	0.83871	0.843961	1	1256	tags=62%, list=53%, signal=130%
KEGG_APOPTOSIS	KEGG_APOPTOSIS		18	0.134716	0.68235	0.857434	0.881709	1	1120	tags=61%, list=48%, signal=116%
KEGG_SYSTEMIC_LUPUS_ERYTHEMATOSUS	KEGG_SYSTEMIC_LUPUS_ERYTHEMATOSUS		16	0.140759	0.681057	0.859213	0.874633	1	698	tags=44%, list=30%, signal=62%
PID_HIF1_TFPATHWAY	PID_HIF1_TFPATHWAY		18	0.123033	0.638962	0.898833	0.908358	1	495	tags=33%, list=21%, signal=42%

## Sheet: WT vs IKO liver up cp
NAME	GS<br> follow link to MSigDB	GS DETAILS	SIZE	ES	NES	NOM p-val	FDR q-val	FWER p-val	RANK AT MAX	LEADING EDGE
REACTOME_INTERFERON_SIGNALING	REACTOME_INTERFERON_SIGNALING	Details ...	17	0.401711	1.98609	0.0040404	0.0254345	0.028	245	tags=82%, list=43%, signal=141%
REACTOME_IMMUNE_SYSTEM	REACTOME_IMMUNE_SYSTEM	Details ...	46	0.237587	1.84709	0.0183299	0.0341647	0.062	245	tags=65%, list=43%, signal=106%
REACTOME_CYTOKINE_SIGNALING_IN_IMMUNE_SYSTEM	REACTOME_CYTOKINE_SIGNALING_IN_IMMUNE_SYSTEM	Details ...	23	0.320652	1.81271	0.00996016	0.0267764	0.073	219	tags=70%, list=39%, signal=109%
REACTOME_ADAPTIVE_IMMUNE_SYSTEM	REACTOME_ADAPTIVE_IMMUNE_SYSTEM	Details ...	19	0.222244	1.19323	0.219466	0.296443	0.733	295	tags=74%, list=52%, signal=148%
REACTOME_BIOLOGICAL_OXIDATIONS	REACTOME_BIOLOGICAL_OXIDATIONS	Details ...	16	0.241833	1.15224	0.263889	0.270567	0.783	291	tags=75%, list=51%, signal=150%

## Sheet: WT vs IKO liver down cp
NAME	GS<br> follow link to MSigDB	GS DETAILS	SIZE	ES	NES	NOM p-val	FDR q-val	FWER p-val	RANK AT MAX	LEADING EDGE
NABA_MATRISOME	NABA_MATRISOME	Details ...	37	-0.244263	-1.72523	0.0242424	0.112222	0.112	224	tags=62%, list=40%, signal=96%
KEGG_MAPK_SIGNALING_PATHWAY	KEGG_MAPK_SIGNALING_PATHWAY	Details ...	15	-0.276449	-1.29029	0.179704	0.420148	0.584	113	tags=47%, list=20%, signal=57%
NABA_MATRISOME_ASSOCIATED	NABA_MATRISOME_ASSOCIATED	Details ...	24	-0.198895	-1.13336	0.304979	0.489775	0.779	82	tags=33%, list=14%, signal=37%
REACTOME_METABOLISM_OF_LIPIDS_AND_LIPOPROTEINS	REACTOME_METABOLISM_OF_LIPIDS_AND_LIPOPROTEINS	Details ...	20	-0.152834	-0.783111	0.713402	0.914294	0.992	371	tags=80%, list=65%, signal=223%
REACTOME_INNATE_IMMUNE_SYSTEM	REACTOME_INNATE_IMMUNE_SYSTEM	Details ...	16	-0.153017	-0.725847	0.786822	0.805708	0.995	23	tags=19%, list=4%, signal=19%

[truncated: 14 more sheets: WT vs SKO liver up cp, WT vs SKO liver down cp, WT vs DKO hepatocyte up go, WT vs DKO hepatocyte down go, WT vs IKO hepatocyte up go, WT vs IKO hepatocyte down go, WT vs SKO hepatocyte up go, WT vs SKO hepatocyte down go, WT vs DKO hepatocyte up cp, WT vs DKO hepatocyte down cp, WT vs IKO hepatocyte up cp, WT vs IKO hepatocyte down cp, WT vs SKO hepatocyte up cp, WT vs SKO hepatocyte down cp]
